# Supplementary material for: Oscillometric blood pressure by age and height for non overweight children and adolescents in Lubumbashi, Democratic Republic of Congo
Source: BMC Cardiovasc Disord. 2018 Jan 19;18:9. doi: 10.1186/s12872-018-0741-4 (PMC5775618; doi:10.1186/s12872-018-0741-4)
Supplement: Additional file 1: — Data on Oscillometric Blood Pressure for Non Overweight Children and Adolescents in Lubumbashi. Tabular datasets of this study is presented as an Excel spreadsheet. (XLSX 2513 kb) [file 12872_2018_741_MOESM1_ESM.xlsx]

## Sheet: FICHIER 3_17 ans TOUS SUJETS
Oscillometric Blood Pressure For Non Overweight Children And Adolescents In Lubumbashi
Nnumberfich	Nnameandpostname	Nsex	x_sex	Nameschool	Nform	Ncongolesenationality	Nresidence	Dateofbirth	Birthweight	Diabtesmetillus	Knideydisesases	Highpressureblood	Others	Ifotherswhat	NVotreenfantprendildesmedicaments	NSipriselequeloulesquelles	Father	Mother	EvaluationDate	Age_child	DecimalAge	x_DecimalAge	Templocale	Weight1	Weight2	Means_Weight	Height1	Height2	Means_Height	TT1	TT2	TT_moy	BMI	SBP1	SBP2	SBP3	SBP12	SBP13	SBP23	DBP1	DBP2	DBP3	DBP12	DBP13	DBP23	MBP1	MBP2	MBP3	FC1
1	ON	F	0	LES BOURGEONS	3	1	KAMPEMBA	2008-10-16	#NULL!	0	0	0	0		2		0	0	2014-03-24	5	5.8	2	27	17.4	17.4	17.4	107	107	107	52.6	52.6	52.6	15.1978	99	98	88	98.5	93.5	93	61	60	51	60.5	56	55.5	78	74	66	95
2	MK	M	1	LES BOURGEONS	3	1	KAMPEMBA	2008-05-04	3500	0	0	0	0		2		0	0	2014-03-24	5	6	2	27	18.2	18.1	18.15	109	109	109	51.1	51.1	51.1	15.2765	98	101	103	99.5	100.5	102	44	62	57	53	50.5	59.5	62	82	80	91
3	DB	M	1	LES BOURGEONS	3	1	KAMPEMBA	2009-01-05	3800	0	0	0	0		2		0	0	2014-03-24	5	5.1	2	27	17.8	17.8	17.8	111	111	111	53	53	53	14.4469	100	96	100	98	100	98	53	58	69	55.5	61	63.5	78	80	80	93
4	AK	F	0	LES BOURGEONS	3	1	KAMPEMBA	2009-10-14	3700	0	0	0	0		2		0	0	2014-03-24	4	4.8	2	27	14.8	14.9	14.85	96.8	96.6	96.7	49.8	49.6	49.7	15.8808	100	94	95	97	97.5	94.5	56	58	52	57	54	55	71	71	73	80
5	Mx	F	0	LES BOURGEONS	3	1	KAMPEMBA	2008-02-12	3600	0	0	0	0		2		0	0	2014-03-24	6	6.1	2	27	20.3	20.3	20.3	112	112	112	58	58	58	16.183	92	97	93	94.5	92.5	95	47	56	65	51.5	56	60.5	66	69	72	101
6	BK	F	0	LES BOURGEONS	3	1	KAMPEMBA	2009-01-06	3200	0	0	0	0		2		0	0	2014-03-24	5	5.1	2	27	18.6	18.6	18.6	109.9	109.9	109.9	57	57	57	15.3999	109	106	108	107.5	108.5	107	61	73	55	67	58	64	83	86	80	91
7	SM	F	0	LES BOURGEONS	3	1	KAMPEMBA	2009-04-05	3150	0	0	0	0		2		0	0	2014-03-24	4	5	2	27	14.3	14.2	14.25	97.5	97.4	97.45	47.4	47.3	47.35	15.0055	103	99	99	101	101	99	60	58	57	59	58.5	57.5	81	75	72	88
8	KK	F	0	LES BOURGEONS	3	1	KAMPEMBA	2009-09-22	#NULL!	0	0	0	0		2		0	0	2014-03-24	4	4.8	2	28	15.2	15.2	15.2	95.3	95.5	95.4	49.8	49.7	49.75	16.7012	93	97	97	95	95	97	56	53	63	54.5	59.5	58	70	72	77	88
9	YK	M	1	LES BOURGEONS	1	1	KAMPEMBA	2010-08-10	#NULL!	0	0	0	0		2		0	0	2014-03-24	3	3.9	2	28	15.5	15.6	15.55	96.5	96.3	96.4	50.2	50.3	50.25	16.7331	86	87	86	86.5	86	86.5	58	44	43	51	50.5	43.5	65	64	66	91
10	KN	F	0	LES BOURGEONS	2	1	KAMPEMBA	2009-08-01	#NULL!	0	0	0	0		2		1	1	2014-03-24	4	4.9	2	28	17	17.1	17.05	106.6	106.7	106.65	52.5	52.4	52.45	14.99	93	92	96	92.5	94.5	94	59	65	48	62	53.5	56.5	72	73	66	120
11	AF	M	1	LES BOURGEONS	3	1	KAMPEMBA	2009-03-07	3200	0	0	0	0		2		0	0	2014-03-24	5	5	2	28	19.5	19.5	19.5	108.6	108	108.3	56.4	56.2	56.3	16.6256	107	107	112	107	109.5	109.5	67	67	75	67	71	71	92	92	89	95
12	KR	M	1	LES BOURGEONS	1	1	KAMPEMBA	2010-07-04	3700	0	0	0	0		2		0	0	2014-03-24	3	3.9	2	28	16	16.1	16.05	96.7	96.5	96.6	51.8	51.7	51.75	17.1997	103	107	109	105	106	108	63	62	69	62.5	66	65.5	81	78	81	100
13	KD	M	1	LES BOURGEONS	3	1	ANNEXE	2009-03-07	3500	0	0	0	0		2		0	0	2014-03-24	5	5	2	28	17	17	17	102	102.1	102.05	47.5	47.3	47.4	16.3239	95	92	94	93.5	94.5	93	61	62	62	61.5	61.5	62	70	74	73	105
14	VL	M	1	LES BOURGEONS	2	1	KAMPEMBA	2009-10-11	4200	0	0	0	0		2		0	0	2014-03-24	4	4.8	2	28	18.2	18.2	18.2	106.2	106.1	106.15	50.5	50.5	50.5	16.1522	88	93	103	90.5	95.5	98	65	67	66	66	65.5	66.5	72	74	85	104
15	MM	M	1	LES BOURGEONS	3	1	KAMPEMBA	2008-05-21	2800	0	0	0	0		2		0	1	2014-03-24	5	5.9	2	28	17.6	17.5	17.55	106.9	106.7	106.8	49.5	49.5	49.5	15.3863	101	115	109	108	105	112	74	63	60	68.5	67	61.5	82	79	77	139
16	MM	M	1	LES BOURGEONS	1	1	LUBUMBASHI	2010-05-17	3600	0	0	0	0		2		0	0	2014-03-24	3	4	2	28	15	15	15	92.3	92.2	92.25	49	49	49	17.6262	96	101	106	98.5	101	103.5	65	63	64	64	64.5	63.5	79	79	75	118
17	LK	M	1	LES BOURGEONS	3	1	KAMPEMBA	2008-07-31	4500	0	0	0	0		2		0	0	2014-03-25	5	5.9	2	27	16.7	16.7	16.7	105.3	105.4	105.35	50.1	50.1	50.1	15.0469	106	105	107	105.5	106.5	106	65	51	59	58	62	55	79	81	79	127
18	TB	F	0	LES BOURGEONS	2	1	KAMPEMBA	2009-03-31	3000	0	0	0	0		2		0	0	2014-03-25	4	5	2	27	16.4	16.4	16.4	106.8	106.7	106.75	50.1	50.1	50.1	14.3916	98	99	97	98.5	97.5	98	65	60	53	62.5	59	56.5	76	74	69	118
19	AL	F	0	LES BOURGEONS	1	1	KAMPEMBA	2010-07-22	3500	0	0	0	0		2		0	1	2014-03-25	3	3.9	2	27	15.3	15.3	15.3	100.5	100.3	100.4	51.1	51.1	51.1	15.1783	78	86	85	82	81.5	85.5	46	52	46	49	46	49	61	65	62	87
20	LL	F	0	LES BOURGEONS	3	1	KAMPEMBA	2009-03-25	3800	0	0	0	0		2		0	0	2014-03-25	5	5	2	28	20.3	20.2	20.25	109.9	109.8	109.85	58	58	58	16.7813	98	107	102	102.5	100	104.5	57	61	65	59	61	63	70	80	79	85
21	AK	F	0	LES BOURGEONS	3	1	KAMPEMBA	2009-03-15	2800	0	0	0	0		2		0	0	2014-03-25	5	5	2	28	19	19	19	112	112	112	48.1	48.1	48.1	15.1467	109	112	111	110.5	110	111.5	72	70	69	71	70.5	69.5	89	84	84	122
23	LS	M	1	LES BOURGEONS	3	1	KAMPEMBA	2009-02-01	3050	0	0	0	0		2		0	0	2014-03-27	5	5.1	2	27	17.6	17.6	17.6	108.8	109	108.9	55.1	55.1	55.1	14.8408	92	85	91	88.5	91.5	88	54	44	50	49	52	47	68	62	62	84
24	KM	M	1	LES BOURGEONS	3	1	KAMPEMBA	2008-08-30	2900	0	0	0	0		2		0	0	2014-03-27	5	5.8	2	27	19.9	19.8	19.85	110.9	110.8	110.85	52.1	52.1	52.1	16.1543	90	88	86	89	88	87	48	53	46	50.5	47	49.5	68	66	62	95
25	M	M	1	LES BOURGEONS	9	1	LUBUMBASHI	2002-08-18	#NULL!	0	0	0	0		2		0	0	2014-03-18	11	11.8	4	27	37.9	38	37.95	150	150.4	150.2	59.5	60	59.75	16.8218	104	103	104	103.5	104	103.5	71	59	58	65	64.5	58.5	85	78	78	78
26	MK	M	1	LES BOURGEONS	9	1	KAMPEMBA	2003-01-28	3750	0	0	0	0		2		0	0	2014-03-18	11	11	4	27	37.6	37.3	37.45	155	155.4	155.2	59.5	59.5	59.5	15.5478	118	127	105	122.5	111.5	116	72	72	72	72	72	72	91	92	82	77
27	NK	M	1	LES BOURGEONS	9	1	KAMPEMBA	2001-07-07	#NULL!	0	0	0	0		2		0	0	2014-03-17	12	12.9	4	27	35	35.5	35.25	140.9	141	140.95	54	54	54	17.7431	105	105	101	105	103	103	75	67	58	71	66.5	62.5	83	80	77	89
28	ON	M	1	LES BOURGEONS	9	1	KAMPEMBA	2000-10-05	#NULL!	0	0	0	0		2		0	0	2014-03-17	13	13.8	4	27	41.1	41.1	41.1	152.3	152.2	152.25	61	61	61	17.7308	126	114	110	120	118	112	75	73	70	74	72.5	71.5	94	93	93	100
29	YM	M	1	LES BOURGEONS	9	1	LUBUMBASHI	2002-09-09	3580	0	0	0	0		2		0	0	2014-03-17	11	11.8	4	27	35.1	35.2	35.15	148	148	148	58	58	58	16.0473	115	106	102	110.5	108.5	104	62	60	57	61	59.5	58.5	81	78	73	94
30	DM	M	1	LES BOURGEONS	9	1	KAMPEMBA	2001-08-21	2000	0	0	0	0		2		0	0	2014-03-17	12	12.8	4	26	40.5	40.5	40.5	162	162	162	60	60	60	15.4321	115	101	109	108	112	105	66	62	53	64	59.5	57.5	87	78	73	85
31	MK	M	1	LES BOURGEONS	8	1	KAMPEMBA	2003-01-30	3500	0	0	0	0		2		0	0	2014-03-17	11	11	4	26	32.1	32.1	32.1	149	149	149	57	57	57	14.4588	99	96	89	97.5	94	92.5	69	52	60	60.5	64.5	56	76	70	72	93
32	MK	M	1	LES BOURGEONS	9	1	KAMPEMBA	2001-03-15	#NULL!	0	0	0	0		2		0	0	2014-03-17	13	13	4	27	42	42	42	152	151.5	151.75	62	62.1	62.05	18.2386	104	103	104	103.5	104	103.5	71	59	58	65	64.5	58.5	85	78	72	79
33	KK	F	0	LES BOURGEONS	9	1	ANNEXE	2002-10-14	3500	0	0	0	0		2		0	0	2014-03-17	11	11.8	4	27	44	44	44	153.7	153.9	153.8	63	62.9	62.95	18.6012	115	110	109	112.5	112	109.5	69	63	66	66	67.5	64.5	88	82	79	84
34	MK	F	0	LES BOURGEONS	9	1	KAMPEMBA	2002-09-30	3400	0	0	0	0		2		0	0	2014-03-17	11	11.8	4	27	37	37	37	154	154	154	60.6	61	60.8	15.6013	103	100	96	101.5	99.5	98	69	57	56	63	62.5	56.5	84	78	73	74
35	NN	F	0	LES BOURGEONS	9	1	KAMPEMBA	2001-09-10	3600	0	0	0	0		2		0	0	2014-03-17	12	12.8	4	27	47.5	47.5	47.5	160.2	160	160.1	63.5	63	63.25	18.5315	103	100	98	101.5	100.5	99	62	61	58	61.5	60	59.5	73	71	72	83
36	NI	M	1	LES BOURGEONS	8	1	KAMPEMBA	2004-03-23	3000	0	0	0	0		2		0	0	2014-03-17	9	10	3	27	29.1	29.1	29.1	138.4	138.4	138.4	57	57	57	15.1922	97	93	93	95	95	93	52	56	51	54	51.5	53.5	71	71	68	76
37	M	F	0	LES BOURGEONS	8	1	KAMPEMBA	2003-09-02	2000	0	0	0	0		2		0	0	2014-03-17	10	10.9	3	27	29	29	29	132	131.8	131.9	55.2	55.4	55.3	16.669	104	103	104	103.5	104	103.5	71	59	58	65	64.5	58.5	86	78	78	80
38	LN	M	1	LES BOURGEONS	8	1	KAMPEMBA	2004-04-11	#NULL!	0	0	0	0		2		0	0	2014-03-17	9	10	3	27	29	29	29	132	131.6	131.8	55	55.3	55.15	16.6943	111	111	107	111	109	109	77	75	70	76	73.5	72.5	93	86	82	80
39	Kx	F	0	LES BOURGEONS	8	1	KAMPEMBA	2002-04-07	#NULL!	0	0	0	0		2		0	0	2014-03-17	11	12	4	27	36	36	36	153	153.2	153.1	61	61	61	15.3586	107	101	105	104	106	103	67	56	62	61.5	64.5	59	80	76	81	80
40	SK	F	0	LES BOURGEONS	8	1	LUBUMBASHI	2003-03-26	4250	0	0	0	0		2		0	0	2014-03-18	10	11	4	27	29.7	29.7	29.7	137	137	137	57	57.4	57.2	15.824	119	114	109	116.5	114	111.5	67	57	67	62	67	62	86	84	81	94
41	MM	M	1	LES BOURGEONS	8	1	KAMPEMBA	2003-05-16	2800	0	0	0	0		2		0	0	2014-03-17	10	10.9	3	27	32	32	32	143	143	143	60	60	60	15.6487	113	103	102	108	107.5	102.5	61	68	55	64.5	58	61.5	82	83	77	83
42	LL	M	1	LES BOURGEONS	8	1	KAMPEMBA	2003-06-29	#NULL!	0	0	0	0		2		0	0	2014-03-17	10	10.9	3	27	31	31	31	140	140	140	56	56	56	15.8163	100	110	119	105	109.5	114.5	62	69	67	65.5	64.5	68	68	82	85	91
43	L	F	0	LES BOURGEONS	8	1	KAMPEMBA	2004-05-19	#NULL!	0	0	0	0		2		0	0	2014-03-17	9	9.9	3	27	28.7	28.7	28.7	136	136	136	54.4	54.4	54.4	15.5169	102	97	95	99.5	98.5	96	58	58	52	58	55	55	77	71	64	81
44	KO	M	1	LES BOURGEONS	8	1	KAMPEMBA	2002-02-28	#NULL!	0	0	0	0		2		0	0	2014-03-17	12	12	4	27	38.9	38.8	38.85	152.7	152.8	152.75	63	62.7	62.85	16.6506	96	93	95	94.5	95.5	94	57	51	52	54	54.5	51.5	71	70	71	71
45	MM	F	0	LES BOURGEONS	8	1	KAMPEMBA	2004-03-05	#NULL!	0	0	0	0		2		0	0	2014-03-17	10	10	3	27	29	29.2	29.1	132	131.8	131.9	55	55.6	55.3	16.7264	96	94	94	95	95	94	58	62	54	60	56	58	74	70	67	98
46	NK	M	1	LES BOURGEONS	8	1	LUBUMBASHI	2003-01-28	#NULL!	0	0	0	0		2		0	0	2014-03-17	11	11	4	27	36	35.8	35.9	148.1	148.3	148.2	61	61	61	16.3455	117	116	97	116.5	107	106.5	74	101	73	87.5	73.5	87	93	106	80	104
47	MN	F	0	LES BOURGEONS	8	1	KAMPEMBA	2005-05-01	3800	0	0	0	0		2		0	0	2014-03-17	8	9	3	27	27	27	27	132	132	132	52	51.8	51.9	15.4959	95	91	88	93	91.5	89.5	56	38	51	47	53.5	44.5	75	59	67	88
48	E	F	0	LES BOURGEONS	8	1	KAMPEMBA	2004-03-08	#NULL!	0	0	0	0		2		0	0	2014-03-17	10	10	3	27	32	32	32	135	135	135	57	57	57	17.5583	101	96	100	98.5	100.5	98	65	71	51	68	58	61	79	77	75	92
49	Tx	F	0	LES BOURGEONS	8	1	KAMPEMBA	2001-10-11	2900	0	0	0	0		2		0	0	2014-03-18	12	12.8	4	27	42.9	42.9	42.9	153	152.8	152.9	62.8	62.8	62.8	18.3503	120	117	120	118.5	120	118.5	66	66	62	66	64	64	93	87	87	102
50	KH	M	1	LES BOURGEONS	8	1	KAMPEMBA	2001-08-11	3850	0	0	0	0		2		0	0	2014-03-18	12	12.9	4	27	38	38	38	146.9	147	146.95	60	60	60	17.5972	108	110	113	109	110.5	111.5	77	62	70	69.5	73.5	66	84	79	83	80
51	FK	M	1	LES BOURGEONS	8	1	KAMPEMBA	2005-08-06	2500	0	0	0	0		2		0	0	2014-03-18	8	8.9	3	27	27	27	27	129	129	129	51	51	51	16.225	97	97	95	97	96	96	66	62	58	64	62	60	77	76	73	81
52	Kx	F	0	LES BOURGEONS	8	1	KAMPEMBA	2004-03-17	#NULL!	0	0	0	0		2		0	0	2014-03-18	10	10	3	27	30	30	30	135	135	135	54	54	54	16.4609	123	117	106	120	114.5	111.5	68	68	64	68	66	66	100	86	80	100
53	BM	F	0	LES BOURGEONS	8	1	LUBUMBASHI	2003-08-04	3400	0	0	0	0		2		0	0	2014-03-18	10	10.9	3	27	31	31	31	137	137	137	59.8	59.8	59.8	16.5166	118	102	108	110	113	105	58	61	57	59.5	57.5	59	79	79	75	110
54	MM	M	1	LES BOURGEONS	8	1	KAMPEMBA	2002-10-10	2800	0	0	0	0		2		0	0	2014-03-18	11	11.8	4	27	34	33	33.5	154	154	154	57	57	57	14.1255	113	121	116	117	114.5	118.5	65	71	63	68	64	67	82	87	83	99
55	Kx	M	1	LES BOURGEONS	8	1	KAMPEMBA	2003-04-16	#NULL!	0	0	0	0		2		0	0	2014-03-18	10	11	4	27	34	34	34	141	141	141	60	60.5	60.25	17.1018	108	119	111	113.5	109.5	115	68	61	71	64.5	69.5	66	83	80	91	73
56	DJ	M	1	LES BOURGEONS	8	1	LUBUMBASHI	2003-07-31	#NULL!	0	0	0	0		2		0	0	2014-03-18	10	10.8	3	27	30	30	30	132	131.9	131.95	62	62	62	17.2307	96	96	98	96	97	97	52	49	56	50.5	54	52.5	74	74	72	68
57	MM	M	1	LES BOURGEONS	8	1	LUBUMBASHI	2004-07-19	3000	0	0	0	0		2		0	0	2014-03-18	9	9.9	3	27	27	27.4	27.2	131	131	131	54	53.7	53.85	15.8499	120	126	121	123	120.5	123.5	65	90	53	77.5	59	71.5	86	99	92	86
58	MT	F	0	LES BOURGEONS	8	1	KAMPEMBA	2003-11-17	#NULL!	0	0	0	0		2		0	0	2014-03-18	10	10.8	3	27	28	28	28	130	130	130	55	55.1	55.05	16.568	101	102	99	101.5	100	100.5	61	67	60	64	60.5	63.5	75	80	77	77
59	TM	F	0	LES BOURGEONS	8	1	KAMPEMBA	2003-07-10	#NULL!	0	0	0	0		2		0	0	2014-03-18	10	10.9	3	27	27	27.4	27.2	133	132.9	132.95	53	53.2	53.1	15.3884	120	119	111	119.5	115.5	115	70	74	69	72	69.5	71.5	88	91	86	98
60	BB	M	1	LES BOURGEONS	8	1	KAMPEMBA	2002-04-05	3500	0	0	0	0		2		0	0	2014-03-18	11	12	4	27	34	34	34	149	149	149	58	58	58	15.3146	109	110	103	109.5	106	106.5	69	65	62	67	65.5	63.5	80	80	76	71
61	KN	M	1	LES BOURGEONS	9	1	KAMPEMBA	2003-05-06	3300	0	0	0	0		2		0	0	2014-03-18	10	11	4	29	32	32	32	143	143	143	59	59	59	15.6487	104	117	115	110.5	109.5	116	72	69	62	70.5	67	65.5	87	88	80	82
62	MT	M	1	LES BOURGEONS	9	1	KAMPEMBA	2002-03-01	#NULL!	0	0	0	0		2		0	0	2014-03-18	12	12	4	28	41	41	41	153	153	153	65	65	65	17.5146	120	134	129	127	124.5	131.5	69	70	67	69.5	68	68.5	93	92	88	74
63	Rx	M	1	LES BOURGEONS	9	1	KAMPEMBA	2002-01-01	#NULL!	0	0	0	0		2		0	0	2014-03-18	12	12.1	4	28	37	37	37	146	145.7	145.85	60	60	60	17.3936	112	108	102	110	107	105	57	60	69	58.5	63	64.5	79	78	81	60
64	MP	M	1	LES BOURGEONS	9	1	KAMPEMBA	2003-03-27	4000	0	0	0	0		2		0	0	2014-03-18	10	11	4	28	28	28	28	135	135	135	56	56	56	15.3635	111	106	107	108.5	109	106.5	75	75	65	75	70	70	85	84	81	81
65	Mx	M	1	LES BOURGEONS	9	1	KAMPEMBA	2002-07-17	#NULL!	0	0	0	0		2		0	0	2014-03-18	11	11.9	4	28	34	34	34	150	150	150	61.1	61.1	61.1	15.1111	108	103	103	105.5	105.5	103	63	69	62	66	62.5	65.5	87	79	79	83
66	KM	F	0	LES BOURGEONS	9	1	KAMPEMBA	2003-02-08	2800	0	0	0	0		2		0	0	2014-03-18	11	11.1	4	27	31	31	31	145	145	145	55	55	55	14.7444	92	92	90	92	91	91	65	62	60	63.5	62.5	61	76	79	74	77
67	KM	M	1	LES BOURGEONS	9	1	KAMPEMBA	2003-05-13	2800	0	0	0	0		2		0	0	2014-03-18	10	11	4	28	32	32	32	140	140	140	59	59	59	16.3265	93	98	97	95.5	95	97.5	69	58	53	63.5	61	55.5	80	76	70	68
68	KN	F	0	LES BOURGEONS	9	1	KAMPEMBA	2003-05-13	2800	0	0	0	0		2		0	0	2014-03-18	10	11	4	28	28.7	28.7	28.7	137	137	137	57	57.2	57.1	15.2912	105	106	107	105.5	106	106.5	58	62	54	60	56	58	77	77	75	80
69	NF	F	0	LES BOURGEONS	9	1	KAMPEMBA	2003-03-13	#NULL!	0	0	0	0		2		0	0	2014-03-18	11	11	4	28	34	34	34	149	149	149	58	58.4	58.2	15.3146	119	127	127	123	123	127	66	72	65	69	65.5	68.5	87	92	96	61
70	BS	M	1	LES BOURGEONS	8	1	KAMPEMBA	2002-01-07	3800	0	0	0	0		2		0	0	2014-03-19	12	12.1	4	27	36	36	36	150.6	150.6	150.6	60	60	60	15.8728	96	105	105	100.5	100.5	105	65	76	66	70.5	65.5	71	82	84	78	67
71	KM	M	1	LES BOURGEONS	8	1	ANNEXE	2005-03-17	3000	0	0	0	0		2		0	0	2014-03-19	9	9	3	27	24.9	24.9	24.9	137	137	137	54	54	54	13.2666	108	112	109	110	108.5	110.5	74	75	71	74.5	72.5	73	89	86	87	88
72	AM	M	1	LES BOURGEONS	8	1	KAMPEMBA	2003-02-01	#NULL!	0	0	0	0		2		0	0	2014-03-19	11	11.1	4	27	36	36	36	153	153	153	62	62	62	15.3787	102	108	107	105	104.5	107.5	68	66	64	67	66	65	85	83	81	93
73	KN	F	0	LES BOURGEONS	8	1	KAMPEMBA	2004-05-22	2800	0	0	0	0		2		0	0	2014-03-19	9	9.9	3	27	27	27	27	128	128	128	51	51.2	51.1	16.4795	93	93	93	93	93	93	57	50	57	53.5	57	53.5	74	74	69	96
74	MM	F	0	LES BOURGEONS	8	1	RUASHI	2003-10-10	2800	0	0	0	0		2		0	0	2014-03-19	10	10.8	3	27	30	30.2	30.1	133	133.1	133.05	55	55.3	55.15	17.0034	105	105	105	105	105	105	64	59	64	61.5	64	61.5	79	80	79	78
75	KS	F	0	LES BOURGEONS	8	1	KAMPEMBA	2003-05-10	3100	0	0	0	0		2		0	0	2014-03-19	10	11	4	27	28.1	28.1	28.1	133	132.8	132.9	55	55.2	55.1	15.9095	93	92	86	92.5	89.5	89	50	51	57	50.5	53.5	54	68	66	68	80
76	TK	M	1	LES BOURGEONS	7	1	KAMPEMBA	2004-09-15	3970	0	0	0	0		2		0	0	2014-03-19	9	9.8	3	28	26.4	26.4	26.4	129	129	129	52	52.1	52.05	15.8644	101	97	97	99	99	97	69	67	58	68	63.5	62.5	81	77	73	89
77	SM	F	0	LES BOURGEONS	7	1	KAMPEMBA	2004-04-29	2960	0	0	0	0		2		0	1	2014-03-19	9	9.9	3	27	30.1	30	30.05	131	130.5	130.75	53	53	53	17.5777	119	123	121	121	120	122	78	73	74	75.5	76	73.5	92	90	93	102
78	ZM	F	0	LES BOURGEONS	7	1	KAMPEMBA	2004-08-01	#NULL!	0	0	0	0		2		0	0	2014-03-19	9	9.9	3	27	26.1	26	26.05	128.3	128.3	128.3	50	50	50	15.8254	101	105	96	103	98.5	100.5	60	70	65	65	62.5	67.5	79	82	75	97
79	KK	F	0	LES BOURGEONS	7	1	KAMPEMBA	2004-08-25	#NULL!	0	0	0	0		2		0	0	2014-03-19	9	9.8	3	27	28.3	28.2	28.25	131.7	132	131.85	54	53.8	53.9	16.2502	110	119	122	114.5	116	120.5	67	71	71	69	69	71	88	92	94	86
80	KM	F	0	LES BOURGEONS	7	1	KAMPEMBA	2005-04-06	3100	0	0	0	0		2		0	0	2014-03-19	8	9	3	27	29	28	28.5	132	132	132	56	56	56	16.3567	102	97	107	99.5	104.5	102	69	55	78	62	73.5	66.5	84	74	84	79
81	MK	M	1	LES BOURGEONS	7	1	KAMPEMBA	2005-12-22	3500	0	0	0	0		2		0	0	2014-03-19	8	8.7	3	28	22	22	22	126.5	126.5	126.5	51	51	51	13.7481	113	116	114	114.5	113.5	115	67	75	73	71	70	74	90	96	93	88
82	NM	F	0	LES BOURGEONS	7	1	KAMPEMBA	2004-12-01	3000	0	0	0	0		2		0	0	2014-03-19	9	9.8	3	28	28	28	28	131	131	131	53	53	53	16.3161	109	109	109	109	109	109	60	66	59	63	59.5	62.5	82	84	75	90
83	MM	F	0	LES BOURGEONS	8	1	KAMPEMBA	2002-05-20	3500	0	0	0	0		2		0	0	2014-03-19	11	11.9	4	28	31.6	31.6	31.6	146.9	147	146.95	58	58	58	14.6335	109	106	119	107.5	114	112.5	59	59	52	59	55.5	55.5	87	77	89	96
84	MM	M	1	LES BOURGEONS	8	1	KAMPEMBA	2003-07-20	4300	0	0	0	0		2		0	0	2014-03-19	10	10.9	3	28	29	29	29	131	131.4	131.2	56	56	56	16.8473	91	96	96	93.5	93.5	96	64	66	66	65	65	66	77	78	80	98
85	AR	F	0	LES BOURGEONS	9	1	KAMPEMBA	2003-11-08	3300	0	0	0	0		2		0	0	2014-03-19	10	10.8	3	28	32	32	32	136	136	136	57	57	57	17.301	106	120	105	113	105.5	112.5	71	62	68	66.5	69.5	65	84	83	88	81
86	KB	F	0	LES BOURGEONS	9	1	KAMPEMBA	2002-06-02	#NULL!	0	0	0	0		2		0	0	2014-03-19	11	12	4	28	30	31	30.5	146	146	146	58	58	58	14.3085	112	94	108	103	110	101	55	73	56	64	55.5	64.5	75	82	71	70
87	FK	F	0	LES BOURGEONS	9	1	KAMPEMBA	2003-04-04	2890	0	0	0	0		2		0	0	2014-03-19	10	11	4	28	27.6	27.6	27.6	132	132	132	53	53	53	15.8402	109	113	102	111	105.5	107.5	65	71	58	68	61.5	64.5	81	85	77	92
88	KK	M	1	LES BOURGEONS	9	1	KAMPEMBA	2001-03-01	#NULL!	0	0	0	0		2		0	0	2014-03-19	13	13	4	28	40.7	40.7	40.7	152	151.8	151.9	63	63	63	17.6392	111	110	110	110.5	110.5	110	67	71	65	69	66	68	89	85	84	86
89	AL	M	1	LES BOURGEONS	7	1	KAMPEMBA	2004-02-17	3000	0	0	0	0		2		0	0	2014-03-19	10	10	3	28	27	27	27	135.4	135.4	135.4	56.7	56.7	56.7	14.7274	115	126	116	120.5	115.5	121	73	85	67	79	70	76	97	98	89	90
90	ST	M	1	LES BOURGEONS	7	1	KAMPEMBA	2004-01-30	3700	0	0	0	0		2		0	0	2014-03-19	10	10	3	28	29.7	29.7	29.7	136	135.9	135.95	57	57.1	57.05	16.0693	117	130	122	123.5	119.5	126	77	69	72	73	74.5	70.5	104	90	98	114
91	MS	M	1	LES BOURGEONS	7	1	KAMPEMBA	2003-03-27	3300	0	0	0	0		2		0	0	2014-03-19	10	11	4	28	31	31	31	145	145	145	54.3	54.2	54.25	14.7444	100	99	100	99.5	100	99.5	66	60	63	63	64.5	61.5	80	77	75	95
92	NN	M	1	LES BOURGEONS	7	1	KAMPEMBA	2004-03-22	#NULL!	0	0	0	0		2		0	0	2014-03-19	9	10	3	28	27.7	27.7	27.7	139	139	139	51	51	51	14.3367	116	113	114	114.5	115	113.5	71	73	71	72	71	72	89	88	86	115
93	TM	F	0	LES BOURGEONS	7	1	KAMPEMBA	2005-02-10	3300	0	0	0	0		2		0	0	2014-03-19	9	9.1	3	30	29	29	29	140	140	140	56	56.1	56.05	14.7959	101	110	100	105.5	100.5	105	65	68	67	66.5	66	67.5	82	81	85	103
94	MM	F	0	LES BOURGEONS	7	1	KAMPEMBA	2004-12-02	3200	0	0	0	0		2		0	0	2014-03-19	9	9.8	3	29	32	32	32	142	142	142	60	60	60	15.8699	107	100	100	103.5	103.5	100	70	74	58	72	64	66	87	82	78	90
95	AN	F	0	LES BOURGEONS	7	1	KAMPEMBA	2004-02-22	3500	0	0	0	0		2		0	0	2014-03-19	10	10	3	29	28	28	28	132	132	132	53	53	53	16.0698	99	95	96	97	97.5	95.5	64	53	66	58.5	65	59.5	76	72	76	107
96	MM	F	0	LES BOURGEONS	7	1	KAMPEMBA	2005-08-06	2700	0	0	0	0		2		0	0	2014-03-19	8	8.9	3	30	25.3	25.3	25.3	123	123	123	48	48	48	16.7229	112	120	112	116	112	116	67	64	59	65.5	63	61.5	85	85	75	104
97	IN	F	0	LES BOURGEONS	7	1	KAMPEMBA	2004-07-16	3800	0	0	0	0		2		1	0	2014-03-19	9	9.9	3	30	28	28	28	130	130	130	52	52	52	16.568	95	91	103	93	99	97	78	63	67	70.5	72.5	65	83	77	84	100
98	KK	M	1	LES BOURGEONS	7	1	KAMPEMBA	2004-07-16	3000	0	0	0	0		2		1	0	2014-03-19	9	9.9	3	28	29	29	29	131.2	131.2	131.2	54	54	54	16.8473	108	117	128	112.5	118	122.5	72	69	74	70.5	73	71.5	88	87	92	103
99	AB	M	1	LES BOURGEONS	7	1	KAMPEMBA	2004-11-23	3600	0	0	0	0		2		0	0	2014-03-19	9	9.7	3	28	26	26	26	129	129	129	51	51	51	15.6241	97	90	94	93.5	95.5	92	64	79	67	71.5	65.5	73	80	81	79	100
100	MN	F	0	LES BOURGEONS	7	1	KAMPEMBA	2004-06-13	#NULL!	0	0	0	0		2		0	0	2014-03-19	9	9.9	3	29	26	26	26	129	129	129	51.1	51.2	51.15	15.6241	112	120	122	116	117	121	92	74	85	83	88.5	79.5	102	90	97	110
101	KL	F	0	LES BOURGEONS	7	1	KAMPEMBA	2005-03-20	3350	0	0	0	0		2		0	0	2014-03-19	8	9	3	28	26.7	26.7	26.7	126	126.3	126.15	50	50	50	16.7779	103	104	98	103.5	100.5	101	71	67	68	69	69.5	67.5	90	85	79	118
102	KN	M	1	LES BOURGEONS	7	1	KAMPEMBA	2003-10-03	4800	0	0	0	0		2		0	0	2014-03-19	10	10.8	3	28	28.1	28.1	28.1	129	129	129	53.7	53.7	53.7	16.886	109	124	126	116.5	117.5	125	66	84	78	75	72	81	92	99	103	80
103	MB	M	1	LES BOURGEONS	9	1	KAMPEMBA	2002-12-23	3300	0	0	0	0		2		0	0	2014-03-21	11	11.7	4	27	34.3	34.3	34.3	148	148	148	57	57.2	57.1	15.6592	120	117	111	118.5	115.5	114	75	72	68	73.5	71.5	70	109	90	84	97
104	FB	F	0	LES BOURGEONS	7	1	LUBUMBASHI	2003-10-11	3000	0	0	0	0		2		0	1	2014-03-21	10	10.8	3	26	29	28.9	28.95	138	138	138	57	57.1	57.05	15.2016	102	99	102	100.5	102	100.5	56	51	47	53.5	51.5	49	69	73	67	74
105	MM	F	0	LES BOURGEONS	7	1	KAMPEMBA	2005-03-11	2600	0	0	0	0		2		0	0	2014-03-21	9	9	3	27	26.1	26.1	26.1	126.2	126.2	126.2	51.1	50.9	51	16.3878	102	121	108	111.5	105	114.5	77	78	68	77.5	72.5	73	88	93	85	92
106	MM	M	1	LES BOURGEONS	7	1	KAMPEMBA	2004-08-30	3500	0	0	0	1	DREPANOCYTAIRE	1	ACIDE FOLIQUE	0	0	2014-03-21	9	9.8	3	27	27	27	27	137	137	137	50	50	50	14.3854	117	114	98	115.5	107.5	106	65	76	59	70.5	62	67.5	85	89	81	103
107	KB	M	1	LES BOURGEONS	7	1	KAMPEMBA	2004-04-24	#NULL!	0	0	0	0		2		0	0	2014-03-21	9	10	3	27	30.1	30.1	30.1	132	131.8	131.9	50.8	50.9	50.85	17.3012	109	108	109	108.5	109	108.5	69	71	69	70	69	70	82	83	81	102
612	KG	M	1	GABRIELLA	8	1	KAMPEMBA	2004-01-14	3250	0	0	0	0		2		0	0	2014-04-22	10	10.1	3	27	30.9	30.9	30.9	143.2	143.2	143.2	55.8	55.8	55.8	15.0686	108	123	120	115.5	114	121.5	67	74	78	70.5	72.5	76	89	92	97	78
613	KV	M	1	GABRIELLA	8	1	KAMPEMBA	2003-10-10	3500	0	0	0	0		2		0	0	2014-04-22	10	10.9	3	27	44.3	44.3	44.3	145	145.2	145.1	75	74.8	74.9	21.0411	101	88	95	94.5	98	91.5	65	67	78	66	71.5	72.5	77	74	89	72
614	TE	M	1	GABRIELLA	8	1	KAMPEMBA	2002-05-05	3500	0	0	0	0		2		0	0	2014-04-22	11	12	4	27	35.3	35.3	35.3	153.7	153.7	153.7	61.2	61.2	61.2	14.9426	113	121	121	117	117	121	69	67	68	68	68.5	67.5	91	86	89	87
615	SM	M	1	GABRIELLA	8	1	KAMPEMBA	2001-07-06	4200	0	0	0	0		2		0	0	2014-04-22	12	13	4	27	42.7	42.7	42.7	157.1	157.1	157.1	64.2	64	64.1	17.3012	110	112	119	111	114.5	115.5	71	85	68	78	69.5	76.5	91	93	85	59
616	MM	M	1	GABRIELLA	8	1	KAMPEMBA	2001-02-09	#NULL!	0	0	0	0		2		0	0	2014-04-22	13	13.1	4	27	33.6	33.6	33.6	143.2	143.5	143.35	55.3	53.3	54.3	16.351	108	111	116	109.5	112	113.5	73	73	84	73	78.5	78.5	86	86	93	75
617	NN	F	0	GABRIELLA	8	1	KAMPEMBA	2003-05-24	3100	0	0	0	0		2		0	0	2014-04-22	10	11	4	27	41	40.8	40.9	153.1	153.1	153.1	63.1	62.9	63	17.4491	111	128	136	119.5	123.5	132	91	75	67	83	79	71	99	94	93	92
618	MM	M	1	GABRIELLA	8	1	KAMPEMBA	2002-05-02	#NULL!	0	0	0	0		2		0	0	2014-04-22	11	12	4	27	43.6	43.6	43.6	158.3	158.5	158.4	64.2	64.2	64.2	17.3771	87	101	96	94	91.5	98.5	65	66	58	65.5	61.5	62	74	93	73	80
619	BB	F	0	GABRIELLA	8	1	KAMPEMBA	2003-10-18	2700	0	0	0	0		2		0	0	2014-04-22	10	10.8	3	27	28.5	28.5	28.5	143.5	143.5	143.5	53.2	53.2	53.2	13.8402	102	95	95	98.5	98.5	95	68	63	63	65.5	65.5	63	83	73	74	89
620	KP	M	1	GABRIELLA	8	1	KAMPEMBA	2003-07-02	4500	0	0	0	0		2		0	0	2014-04-22	10	11	4	24	30.6	30.6	30.6	139.7	139.7	139.7	58.2	58.2	58.2	15.6794	118	108	121	113	119.5	114.5	75	71	66	73	70.5	68.5	87	85	80	90
621	KM	F	0	GABRIELLA	8	1	KAMPEMBA	2003-01-31	3200	0	0	0	0		2		0	0	2014-04-22	11	11.1	4	26	35.5	35.5	35.5	154.2	154.2	154.2	63.3	63.3	63.3	14.93	132	126	129	129	130.5	127.5	77	90	77	83.5	77	83.5	95	101	95	99
622	KK	M	1	GABRIELLA	8	1	KAMPEMBA	2003-04-13	4800	0	0	0	0		2		0	0	2014-04-22	11	11	4	26	34.6	36.6	35.6	139.2	139.4	139.3	62.3	62.3	62.3	18.3463	107	113	104	110	105.5	108.5	75	79	83	77	79	81	87	89	93	64
623	KM	F	0	GABRIELLA	8	1	KAMPEMBA	2002-03-30	#NULL!	0	0	0	0		2		0	0	2014-04-22	12	12	4	26	44.7	44.7	44.7	150.2	150.2	150.2	66.2	66.2	66.2	19.8138	120	111	113	115.5	116.5	112	75	74	65	74.5	70	69.5	98	89	86	78
624	KN	M	1	GABRIELLA	9	1	KAMPEMBA	2002-07-02	3750	0	0	0	0		2		0	0	2014-04-22	11	12	4	24	34.8	34.1	34.45	153.3	153.3	153.3	60.2	60.2	60.2	14.659	101	100	99	100.5	100	99.5	77	76	68	76.5	72.5	72	85	86	81	69
625	MK	F	0	GABRIELLA	9	1	KAMPEMBA	2002-12-10	2800	0	0	0	0		2		0	0	2014-04-22	11	11.8	4	23	45.7	45.7	45.7	163.6	163.4	163.5	66.1	66.4	66.25	17.0955	117	110	107	113.5	112	108.5	66	74	74	70	70	74	85	63	84	68
626	RK	M	1	GABRIELLA	9	1	KAMPEMBA	2000-04-13	5800	0	0	0	0		2		0	0	2014-04-22	14	14	5	23	52.3	52.3	52.3	165.1	165.1	165.1	69	69	69	19.187	117	130	115	123.5	116	122.5	72	75	77	73.5	74.5	76	95	96	94	86
627	MP	M	1	GABRIELLA	9	1	KAMPEMBA	2003-01-04	3100	0	0	0	0		2		0	0	2014-04-22	11	11.1	4	23	31.8	31.8	31.8	143.7	143.7	143.7	59.3	59.1	59.2	15.3997	107	102	100	104.5	103.5	101	76	65	68	70.5	72	66.5	85	82	79	75
628	MA	M	1	GABRIELLA	9	1	KAMPEMBA	1999-06-06	3800	0	0	0	0		2		0	0	2014-04-22	14	15	5	23	56.7	56.7	56.7	154.7	154.8	154.75	73	73.2	73.1	23.6767	128	121	125	124.5	126.5	123	80	66	58	73	69	62	97	88	92	54
629	MI	M	1	GABRIELLA	9	1	KAMPEMBA	2002-08-19	#NULL!	0	0	0	0		2		0	0	2014-04-22	11	11.9	4	24	34.6	34.6	34.6	150.6	150.6	150.6	57.2	57.1	57.15	15.2555	108	113	114	110.5	111	113.5	88	80	80	84	84	80	96	98	92	83
630	BJ	F	0	GABRIELLA	6	1	KAMPEMBA	2005-06-03	3000	0	0	0	0		2		0	0	2014-04-22	8	9	3	27	35.7	35.7	35.7	158.5	158.5	158.5	62.1	62.2	62.15	14.2105	121	120	120	120.5	120.5	120	93	71	68	82	80.5	69.5	103	91	87	84
631	LW	F	0	GABRIELLA	9	1	KAMPEMBA	2002-05-28	3250	0	0	0	0		2		0	0	2014-04-21	11	12	4	27	36.8	36.8	36.8	155.3	155.3	155.3	63.2	62	62.6	15.2583	120	124	116	122	118	120	78	68	68	73	73	68	93	90	96	69
632	MK	M	1	GABRIELLA	9	1	KAMPEMBA	2002-07-20	3500	0	0	0	0		2		1	0	2014-04-21	11	11.9	4	28	30	30	30	145.8	145.8	145.8	60.1	60.1	60.1	14.1126	96	103	106	99.5	101	104.5	62	63	71	62.5	66.5	67	82	82	84	79
633	MW	F	0	GABRIELLA	9	1	KAMPEMBA	2001-03-02	3000	0	0	0	0		2		0	0	2014-04-21	13	13.1	4	28	34.4	34.3	34.35	148.4	148.4	148.4	62.2	62	62.1	15.5976	96	99	104	97.5	100	101.5	68	43	58	55.5	63	50.5	77	76	76	63
634	NK	M	1	GABRIELLA	9	1	KAMPEMBA	2002-08-02	2800	0	0	0	0		2		0	0	2014-04-21	11	11.9	4	26	55.2	55.2	55.2	169.8	169.8	169.8	74.1	74.1	74.1	19.1454	111	117	125	114	118	121	71	72	63	71.5	67	67.5	96	89	63	74
635	NM	M	1	GABRIELLA	7	1	LUBUMBASHI	2004-09-28	#NULL!	0	0	0	0		2		0	0	2014-04-23	9	9.8	3	28	29.4	29.4	29.4	139.7	139.7	139.7	54.6	54.6	54.6	15.0645	106	101	93	103.5	99.5	97	67	58	65	62.5	66	61.5	83	76	76	80
636	KM	F	0	GABRIELLA	7	1	KAMPEMBA	2005-10-13	3800	0	0	0	0		2		0	0	2014-04-23	8	8.8	3	27	31.2	31.2	31.2	139.7	139.7	139.7	60.1	60.1	60.1	15.9868	118	115	113	116.5	115.5	114	77	72	76	74.5	76.5	74	92	90	92	106
637	NJ	F	0	GABRIELLA	7	1	KAMPEMBA	2000-12-19	3100	0	0	0	0		2		0	0	2014-04-23	13	13.8	4	27	45.7	45.7	45.7	157	157	157	69.3	69.4	69.35	18.5403	100	105	108	102.5	104	106.5	70	63	64	66.5	67	63.5	81	83	79	78
638	JA	M	1	GABRIELLA	7	1	KAMPEMBA	2004-12-04	4150	0	0	0	0		2		0	1	2014-04-23	9	9.8	3	28	34.4	34.5	34.45	144.7	144.7	144.7	62.3	62.3	62.3	16.4533	98	106	106	102	102	106	66	63	58	64.5	62	60.5	77	81	77	90
639	NK	F	0	GABRIELLA	7	1	LUBUMBASHI	2005-07-27	2800	0	0	0	0		2		0	0	2014-04-23	8	8.9	3	28	35.6	35.6	35.6	145.2	145.4	145.3	68.1	68.1	68.1	16.8624	102	103	111	102.5	106.5	107	77	63	79	70	78	71	91	83	100	89
640	LN	M	1	GABRIELLA	10	1	KAMPEMBA	2001-02-03	3200	0	0	0	0		2		0	0	2014-04-23	13	13.1	4	27	36.9	36.9	36.9	155.5	155.5	155.5	61.3	61.3	61.3	15.2604	121	120	106	120.5	113.5	113	67	66	69	66.5	68	67.5	86	82	89	81
641	SA	M	1	GABRIELLA	7	1	KAMPEMBA	2003-07-10	4500	0	0	0	0		2		0	0	2014-04-23	10	10.9	3	27	30.6	30.6	30.6	141.5	141.5	141.5	58.5	58.6	58.55	15.283	95	99	97	97	96	98	62	67	61	64.5	61.5	64	82	81	77	71
642	KT	M	1	GABRIELLA	7	1	KAMPEMBA	2004-12-06	3975	0	0	0	0		2		0	0	2014-04-23	9	9.8	3	27	29.7	29.7	29.7	141.5	141.5	141.5	57.2	57.2	57.2	14.8335	102	107	100	104.5	101	103.5	64	65	69	64.5	66.5	67	78	83	80	70
643	MK	M	1	GABRIELLA	10	1	KAMPEMBA	2001-06-06	#NULL!	0	0	0	0		2		0	0	2014-04-23	12	13	4	27	38.5	38.7	38.6	155.2	155.2	155.2	63.2	63.2	63.2	16.0252	123	114	118	118.5	120.5	116	67	68	68	67.5	67.5	68	91	87	87	78
644	MN	F	0	GABRIELLA	10	1	LUBUMBASHI	2000-09-19	#NULL!	0	0	0	0		2		0	0	2014-04-23	13	13.9	4	28	48.9	48.9	48.9	170.5	170.5	170.5	74.1	74.2	74.15	16.8213	111	131	140	121	125.5	135.5	75	83	80	79	77.5	81.5	96	101	100	127
645	IK	F	0	GABRIELLA	10	1	KAMPEMBA	2001-06-12	#NULL!	0	0	0	0		2		0	1	2014-04-23	12	13	4	27	58.1	58.1	58.1	169.1	169.1	169.1	75.2	75.2	75.2	20.3184	106	104	105	105	105.5	104.5	67	68	68	67.5	67.5	68	84	87	86	77
646	CP	F	0	GABRIELLA	10	1	KAMPEMBA	2000-05-21	#NULL!	0	0	0	0		2		0	0	2014-04-23	13	14	5	27	49.4	49.4	49.4	164.2	164.2	164.2	68.5	68.5	68.5	18.3223	119	108	107	113.5	113	107.5	72	67	61	69.5	66.5	64	88	81	79	102
647	BC	M	1	GABRIELLA	10	1	KAMPEMBA	2001-11-16	#NULL!	0	0	0	0		2		0	0	2014-04-23	12	12.8	4	27	30.2	30.2	30.2	145.2	145.2	145.2	57.3	57.3	57.3	14.3243	110	100	109	105	109.5	104.5	57	62	62	59.5	59.5	62	80	79	78	78
648	BM	F	0	GABRIELLA	10	1	KAMPEMBA	1998-10-09	2800	0	0	0	0		2		0	0	2014-04-23	15	15.9	5	27	68.8	68.8	68.8	163.2	163.2	163.2	81.2	81.2	81.2	25.8314	107	134	133	120.5	120	133.5	91	79	85	85	88	82	97	109	104	85
649	KM	M	1	GABRIELLA	10	1	KAMPEMBA	2002-06-14	4000	0	0	0	0		2		0	0	2014-04-23	11	12	4	26	28.1	28.1	28.1	135.6	135.6	135.6	55.5	55.5	55.5	15.2822	94	97	98	95.5	96	97.5	72	64	64	68	68	64	79	80	82	81
650	KK	F	0	GABRIELLA	10	1	KAMPEMBA	2003-04-24	3800	0	0	0	0		2		0	0	2014-04-23	10	11	4	26	25	25	25	137.5	137.3	137.4	51.3	50.9	51.1	13.2424	88	85	86	86.5	87	85.5	56	51	49	53.5	52.5	50	65	64	62	88
651	NW	F	0	GABRIELLA	10	1	KAMPEMBA	2000-05-22	3400	0	0	0	0		2		0	0	2014-04-23	13	14	5	26	47.1	47.1	47.1	155.5	155.6	155.55	65.4	65.4	65.4	19.4662	117	126	120	121.5	118.5	123	70	71	59	70.5	64.5	65	88	91	86	86
652	NK	F	0	GABRIELLA	10	1	KAMPEMBA	2001-08-18	3000	0	0	0	0		2		0	0	2014-04-23	12	12.9	4	27	42.4	42.4	42.4	159.6	159.6	159.6	65.2	64.9	65.05	16.6456	104	107	117	105.5	110.5	112	64	62	62	63	63	62	78	78	86	77
653	ML	F	0	GABRIELLA	10	1	KAMPEMBA	2002-03-30	3400	0	0	0	0		2		0	0	2014-04-23	12	12	4	24	31.4	31.4	31.4	149.9	149.9	149.9	60	60	60	13.9742	105	107	105	106	105	106	74	68	64	71	69	66	94	91	79	98
108	NS	M	1	LES BOURGEONS	7	1	KAMPEMBA	2004-10-15	2900	0	0	0	1	ASTHME BRONCHIQUE	2		0	0	2014-03-21	9	9.8	3	27	27.1	27.3	27.2	128	128	128	52	52	52	16.6016	112	114	113	113	112.5	113.5	71	65	70	68	70.5	67.5	89	87	90	97
109	FK	F	0	LES BOURGEONS	7	1	KAMPEMBA	2003-04-23	#NULL!	0	0	0	0		2		0	0	2014-03-21	10	11	4	27	27.6	27.6	27.6	132	132.2	132.1	52.3	52.3	52.3	15.8162	106	109	110	107.5	108	109.5	53	74	78	63.5	65.5	76	74	88	90	93
110	MB	F	0	LES BOURGEONS	8	1	KAMPEMBA	2002-11-23	2000	0	0	0	0		2		0	0	2014-03-21	11	11.8	4	27	34	34	34	144	144	144	58.7	58.7	58.7	16.3966	104	105	107	104.5	105.5	106	60	64	63	62	61.5	63.5	79	74	71	99
111	TK	M	1	LES BOURGEONS	8	1	KAMPEMBA	2002-02-11	#NULL!	0	0	0	0		2		0	0	2014-03-21	12	12.1	4	27	37	37	37	146.9	147	146.95	63	62.8	62.9	17.1341	106	103	99	104.5	102.5	101	68	71	75	69.5	71.5	73	82	81	84	77
112	BB	M	1	LES BOURGEONS	8	1	KAMPEMBA	2003-11-13	3300	0	0	0	0		2		0	0	2014-03-21	10	10.8	3	27	30	30	30	132	131.7	131.85	53	53	53	17.2568	94	101	108	97.5	101	104.5	55	65	72	60	63.5	68.5	71	77	80	99
113	TK	M	1	LES BOURGEONS	8	1	KAMPEMBA	2003-08-09	#NULL!	0	0	0	0		2		0	0	2014-03-21	10	10.9	3	28	30	30.1	30.05	137	137	137	55	55.2	55.1	16.0104	104	101	98	102.5	101	99.5	67	65	66	66	66.5	65.5	84	78	82	92
114	KM	F	0	LES BOURGEONS	8	1	KAMPEMBA	2004-01-31	2800	0	0	0	0		2		0	0	2014-03-21	10	10	3	27	28	28	28	138	138	138	55	55	55	14.7028	104	108	97	106	100.5	102.5	62	56	56	59	59	56	74	72	71	82
115	KK	M	1	LES BOURGEONS	8	1	KAMPEMBA	2004-08-18	#NULL!	0	0	0	0		2		0	0	2014-03-21	9	9.9	3	27	26	26	26	129.4	129.5	129.45	50	50	50	15.5156	111	116	119	113.5	115	117.5	64	65	65	64.5	64.5	65	84	81	81	96
116	NK	F	0	LES BOURGEONS	8	1	KAMPEMBA	2004-07-12	3090	0	0	0	0		2		0	0	2014-03-21	9	9.9	3	27	27	27	27	130.1	130.1	130.1	51.2	51.2	51.2	15.9518	95	94	85	94.5	90	89.5	56	59	59	57.5	57.5	59	69	72	70	81
117	MK	M	1	LES BOURGEONS	7	1	KAMPEMBA	2003-09-01	#NULL!	0	0	0	0		2		0	0	2014-03-21	10	10.9	3	27	31	31	31	131.6	131.6	131.6	54	54	54	17.8999	98	103	103	100.5	100.5	103	60	65	53	62.5	56.5	59	75	75	69	62
118	EK	M	1	LES BOURGEONS	8	1	KAMPEMBA	2003-03-03	#NULL!	0	0	0	0		2		0	0	2014-03-21	11	11	4	27	36.1	36.1	36.1	150.9	151	150.95	60	59.8	59.9	15.8431	109	125	112	117	110.5	118.5	75	71	68	73	71.5	69.5	86	88	89	74
119	TB	F	0	LES BOURGEONS	7	1	KAMPEMBA	2003-06-19	#NULL!	0	0	0	0		2		0	0	2014-03-21	10	10.9	3	27	33	33	33	137.2	137.1	137.15	58	58	58	17.5437	103	103	101	103	102	102	64	63	64	63.5	64	63.5	82	77	78	80
120	KO	M	1	LES BOURGEONS	7	1	KAMPEMBA	2004-09-21	3150	0	0	0	0		2		0	0	2014-03-21	9	9.8	3	27	28	28	28	132	132.1	132.05	53	53	53	16.0576	100	100	98	100	99	99	72	65	58	68.5	65	61.5	81	80	76	92
121	KF	M	1	LES BOURGEONS	7	1	KAMPEMBA	2005-06-13	2700	0	0	0	0		2		0	0	2014-03-21	8	8.9	3	27	28	27.8	27.9	120	120	120	49	49	49	19.375	110	110	118	110	114	114	65	55	54	60	59.5	54.5	85	78	76	81
122	KF	M	1	LES BOURGEONS	7	1	KAMPEMBA	2004-03-01	#NULL!	0	0	0	0		#NULL!		0	0	2014-03-21	10	10.1	3	27	32	32	32	145	145	145	61	61	61	15.22	112	110	113	111	112.5	111.5	55	74	66	64.5	60.5	70	72	80	83	77
123	KS	M	1	LES BOURGEONS	7	1	KAMPEMBA	2005-04-26	3600	0	0	0	0		2		0	0	2014-03-21	8	9	3	27	23	23	23	129	129	129	48	48	48	13.8213	97	95	104	96	100.5	99.5	64	64	59	64	61.5	61.5	76	77	78	88
124	AD	M	1	LES BOURGEONS	8	1	KAMPEMBA	2003-12-19	2850	0	0	0	0		2		0	0	2014-03-21	10	10.7	3	27	27.9	27.9	27.9	130	130	130	52	52.1	52.05	16.5089	100	106	106	103	103	106	76	69	66	72.5	71	67.5	86	83	81	82
125	MT	F	0	LES BOURGEONS	8	1	KAMPEMBA	2004-03-15	#NULL!	0	0	0	0		2		0	0	2014-03-21	10	10	3	27	30	30.1	30.05	133.1	133.2	133.15	57	57	57	16.9497	94	96	91	95	92.5	93.5	53	58	51	55.5	52	54.5	73	69	68	95
126	KM	M	1	LES BOURGEONS	8	1	KAMPEMBA	2004-04-08	3500	0	0	0	0		2		0	0	2014-03-21	9	10	3	27	26.7	26.7	26.7	127.8	127.8	127.8	51	51	51	16.3474	107	102	97	104.5	102	99.5	73	63	62	68	67.5	62.5	86	79	77	81
127	MK	F	0	LES BOURGEONS	8	1	KAMPEMBA	2004-08-13	3000	0	0	0	0		2		0	0	2014-03-21	9	9.9	3	27	28.4	28.4	28.4	131	131.2	131.1	54	54.2	54.1	16.5239	107	104	107	105.5	107	105.5	60	75	62	67.5	61	68.5	81	84	87	84
128	xx	F	0	LES BOURGEONS	7	1	KAMPEMBA	2004-05-01	2800	0	0	0	0		2		0	0	2014-03-21	9	10	3	27	27.9	28	27.95	132	132.1	132.05	55	55.3	55.15	16.0289	107	98	97	102.5	102	97.5	67	63	58	65	62.5	60.5	81	75	75	92
129	xx	F	0	LES BOURGEONS	7	1	KAMPEMBA	2004-04-05	3200	0	0	0	0		2		1	0	2014-03-21	9	10	3	27	32	32	32	135	135	135	54	54	54	17.5583	98	90	96	94	97	93	55	57	56	56	55.5	56.5	72	72	72	69
130	ME	M	1	LES BOURGEONS	7	1	KAMPEMBA	2005-03-08	3100	0	0	0	0		2		0	0	2014-03-21	9	9	3	27	29	29	29	129	129	129	52	52	52	17.4268	94	92	98	93	96	95	66	58	62	62	64	60	76	70	82	83
131	MI	M	1	LES BOURGEONS	7	1	KAMPEMBA	2004-12-03	4000	0	0	0	0		2		0	1	2014-03-17	9	9.8	3	31	28	28	28	131	131	131	53.7	53.7	53.7	16.3161	100	97	95	98.5	97.5	96	62	63	64	62.5	63	63.5	79	77	78	108
132	LS	F	0	LES BOURGEONS	7	1	KAMPEMBA	2004-07-15	#NULL!	0	0	0	0		2		0	0	2014-03-21	9	9.9	3	27	26	26	26	132	132	132	53	53	53	14.9219	106	105	100	105.5	103	102.5	71	62	59	66.5	65	60.5	88	72	74	86
133	MK	F	0	LES BOURGEONS	7	1	KAMPEMBA	2005-01-16	#NULL!	0	0	0	0		2		0	0	2014-03-21	9	9.1	3	28	26.1	26.2	26.15	129	129	129	52	52	52	15.7142	102	123	107	112.5	104.5	115	73	81	60	77	66.5	70.5	83	101	79	88
134	KL	M	1	LES BOURGEONS	7	1	KAMPEMBA	2004-01-06	3800	0	0	0	0		2		0	0	2014-03-21	10	10.1	3	27	29	29	29	135	135	135	55	55	55	15.9122	99	98	97	98.5	98	97.5	58	58	61	58	59.5	59.5	78	79	75	75
135	MM	M	1	LES BOURGEONS	8	1	ANNEXE	2003-04-24	4000	0	0	0	0		2		0	0	2014-03-21	10	11	4	28	29	29.2	29.1	133	133	133	54.9	54.8	54.85	16.4509	101	96	95	98.5	98	95.5	60	61	58	60.5	59	59.5	75	76	75	78
136	LM	M	1	LES BOURGEONS	7	1	KAMPEMBA	2004-12-21	3600	0	0	0	0		2		0	0	2014-03-21	9	9.7	3	28	27	27	27	136	136	136	52	52	52	14.5978	108	112	102	110	105	107	68	72	72	70	70	72	88	87	82	88
137	MK	F	0	LES BOURGEONS	7	1	KAMPEMBA	2004-04-28	3000	0	0	0	0		2		0	0	2014-03-21	9	10	3	28	28	28	28	133	133	133	56	56	56	15.829	105	100	91	102.5	98	95.5	66	60	66	63	66	63	79	81	76	96
138	MK	M	1	LES BOURGEONS	7	1	KAMPEMBA	2004-09-02	#NULL!	0	0	0	0		2		0	0	2014-03-21	9	9.9	3	30	28.9	28.9	28.9	130.2	130.2	130.2	53	53	53	17.0481	90	87	94	88.5	92	90.5	43	46	34	44.5	38.5	40	66	60	55	87
139	KK	F	0	LES BOURGEONS	7	1	RUASHI	2005-05-07	#NULL!	0	0	0	0		2		0	1	2014-03-21	8	9	3	28	24.3	24.3	24.3	130	130	130	51	51	51	14.3787	96	95	95	95.5	95.5	95	51	46	48	48.5	49.5	47	72	66	65	95
140	NK	M	1	LES BOURGEONS	7	1	KAMPEMBA	2003-06-15	3500	0	0	0	0		2		0	0	2014-03-24	10	10.9	3	27	31.1	31.1	31.1	138	138	138	57.6	57.6	57.6	16.3306	87	88	96	87.5	91.5	92	65	52	48	58.5	56.5	50	74	70	68	78
141	NT	M	1	LES BOURGEONS	7	1	KAMPEMBA	2002-11-01	2800	0	0	0	0		2		0	0	2014-03-24	11	11.8	4	27	37.3	37.4	37.35	147	147	147	59	59	59	17.2845	106	103	98	104.5	102	100.5	60	64	67	62	63.5	65.5	80	82	82	62
142	MM	F	0	LES BOURGEONS	8	1	KAMPEMBA	2003-09-26	3500	0	0	0	1	PRESBYTIE	2		0	1	2014-03-24	10	10.8	3	27	34.5	34.5	34.5	140	140.1	140.05	59	59.2	59.1	17.5895	114	116	122	115	118	119	78	63	73	70.5	75.5	68	92	83	84	95
143	DM	F	0	LES BOURGEONS	8	1	KAMPEMBA	2005-09-08	3300	0	0	0	0		2		0	0	2014-03-25	8	8.9	3	27	28	28	28	128	128.1	128.05	49	49	49	17.0765	99	109	100	104	99.5	104.5	66	63	64	64.5	65	63.5	81	83	79	83
144	DM	F	0	LES BOURGEONS	9	1	KAMPEMBA	2004-02-04	4000	0	0	0	0		2		0	0	2014-03-25	10	10.1	3	27	31.1	31.1	31.1	135.6	135.6	135.6	55.1	55	55.05	16.9138	109	104	104	106.5	106.5	104	64	76	62	70	63	69	98	94	78	115
145	MM	M	1	LES BOURGEONS	9	1	KAMPEMBA	2001-05-31	3000	0	0	0	0		2		0	0	2014-03-25	12	12.9	4	27	39.5	39.5	39.5	151.3	151.2	151.25	57.2	57.2	57.2	17.2666	113	116	114	114.5	113.5	115	66	65	66	65.5	66	65.5	83	82	80	69
146	VK	F	0	LES BOURGEONS	7	1	KAMPEMBA	2003-06-21	4200	0	0	0	0		2		0	0	2014-03-25	10	10.9	3	28	26.4	26.4	26.4	133.1	133.1	133.1	53.6	53.6	53.6	14.9021	114	113	109	113.5	111.5	111	74	68	64	71	69	66	89	85	84	92
147	KK	M	1	LES BOURGEONS	8	1	KAMPEMBA	2003-08-26	#NULL!	0	0	0	0		2		0	0	2014-03-25	10	10.8	3	28	29.8	29.8	29.8	137	137	137	58.1	58.1	58.1	15.8772	88	95	91	91.5	89.5	93	55	61	59	58	57	60	73	71	74	84
148	NK	F	0	LES BOURGEONS	8	1	KAMPEMBA	2004-12-12	#NULL!	0	0	0	0		2		0	1	2014-03-25	9	9.8	3	28	29.1	29.2	29.15	130	130	130	55	54.8	54.9	17.2485	98	96	95	97	96.5	95.5	47	60	54	53.5	50.5	57	74	77	70	69
149	MK	F	0	LES BOURGEONS	7	1	KAMPEMBA	2001-06-25	#NULL!	0	0	0	0		2		0	0	2014-03-25	12	12.9	4	29	42.1	42.1	42.1	151.2	151.3	151.25	61.2	61.2	61.2	18.4031	109	105	105	107	107	105	61	62	61	61.5	61	61.5	79	78	77	69
150	TM	M	1	LES BOURGEONS	7	1	KAMPEMBA	2004-04-04	#NULL!	0	0	0	0		2		0	1	2014-03-26	9	10	3	27	30.1	30.1	30.1	137	137	137	54.8	54.8	54.8	16.0371	108	112	101	110	104.5	106.5	66	67	56	66.5	61	61.5	82	85	74	72
151	KT	M	1	LES BOURGEONS	7	1	KAMPEMBA	2005-02-22	2900	0	0	0	0		2		0	0	2014-03-27	9	9	3	27	25.7	25.7	25.7	130.4	130.6	130.5	52.3	52.3	52.3	15.0908	102	102	107	102	104.5	104.5	62	71	65	66.5	63.5	68	79	81	81	70
152	MK	M	1	LES BOURGEONS	7	1	KAMPEMBA	2004-05-22	#NULL!	0	0	0	0		2		0	0	2014-03-27	9	10	3	27	26.7	26.7	26.7	128	128	128	50	50	50	16.2964	112	113	114	112.5	113	113.5	72	67	70	69.5	71	68.5	89	87	89	87
153	DK	M	1	LES BOURGEONS	7	1	LUBUMBASHI	2005-10-10	3300	0	0	0	0		2		0	0	2014-03-27	8	8.8	3	27	24	24	24	126	126	126	49.5	49.5	49.5	15.1172	114	115	117	114.5	115.5	116	78	70	78	74	78	74	99	85	89	83
156	NM	M	1	LE PALMIER	3	1	KAMPEMBA	2009-10-25	3800	0	0	0	0		2		0	1	2014-03-28	4	4.8	2	27	17.7	17.6	17.65	107.8	107.8	107.8	47.8	47.8	47.8	15.1882	85	91	95	88	90	93	61	60	67	60.5	64	63.5	72	72	76	96
157	MS	F	0	LE PALMIER	3	1	RUASHI	2009-08-28	4000	0	0	0	0		2		0	0	2014-03-28	4	4.8	2	27	16.3	16.2	16.25	91.6	91.6	91.6	50.2	50.3	50.25	19.367	93	94	94	93.5	93.5	94	60	67	65	63.5	62.5	66	70	79	76	91
158	JN	F	0	LE PALMIER	2	1	KAMPEMBA	2010-03-16	3000	0	0	0	0		2		0	0	2014-03-28	4	4	2	28	15.9	16	15.95	96.6	96.6	96.6	49.8	49.6	49.7	17.0925	111	117	107	114	109	112	63	66	80	64.5	71.5	73	88	84	89	97
159	KN	M	1	LE PALMIER	3	1	KAMPEMBA	2009-08-19	3500	0	0	0	0		2		0	0	2014-03-28	4	4.9	2	28	19.2	19.4	19.3	102.9	102.9	102.9	53.4	53.4	53.4	18.2275	129	101	104	115	116.5	102.5	62	87	66	74.5	64	76.5	81	92	79	114
160	OC	M	1	LE PALMIER	3	1	KAMPEMBA	2008-11-29	3300	0	0	0	0		2		0	0	2014-03-28	5	5.8	2	28	18.3	18.3	18.3	107	107	107	50.4	50.6	50.5	15.9839	100	99	92	99.5	96	95.5	52	58	61	55	56.5	59.5	75	76	75	85
161	BO	M	1	LE PALMIER	3	1	KAMPEMBA	2008-12-02	2700	0	0	0	0		2		0	0	2014-03-28	5	5.8	2	28	16.9	16.9	16.9	99.7	99.7	99.7	49.2	50	49.6	17.0019	118	116	116	117	117	116	77	65	79	71	78	72	95	89	92	94
162	BI	M	1	LE PALMIER	1	1	KAMPEMBA	2010-07-01	3175	0	0	0	0		2		0	0	2014-03-28	3	4	2	28	14.7	14.7	14.7	95.7	95.7	95.7	50.2	50.2	50.2	16.0507	94	95	94	94.5	94	94.5	58	51	58	54.5	58	54.5	76	75	73	111
163	BM	F	0	LE PALMIER	2	1	KAMPEMBA	2009-09-24	3800	0	0	0	0		2		0	0	2014-03-28	4	4.8	2	29	17.3	17.5	17.4	98.7	98.6	98.65	54.6	54.8	54.7	17.8795	101	107	112	104	106.5	109.5	70	66	64	68	67	65	80	79	81	99
164	MD	F	0	LE PALMIER	2	1	KAMPEMBA	2009-08-23	3800	0	0	0	0		2		0	0	2014-03-28	4	4.9	2	28	16.2	16.2	16.2	94.3	94.3	94.3	48	48	48	18.2176	96	97	103	96.5	99.5	100	54	62	61	58	57.5	61.5	69	75	75	110
165	NM	M	1	LE PALMIER	3	1	KAMPEMBA	2009-01-10	#NULL!	0	0	0	0		2		0	0	2014-03-28	5	5.1	2	28	20.4	20.3	20.35	110.2	110.2	110.2	49.3	49.6	49.45	16.7572	94	98	102	96	98	100	60	57	66	58.5	63	61.5	72	75	73	89
166	KT	M	1	LE PALMIER	3	1	KAMPEMBA	2009-09-07	#NULL!	0	0	0	0		2		0	0	2014-03-28	4	4.9	2	28	15	14.9	14.95	100.5	100.5	100.5	43.3	43.5	43.4	14.8016	101	103	107	102	104	105	68	61	46	64.5	57	53.5	78	81	69	103
167	IK	M	1	LE PALMIER	3	1	KAMPEMBA	2009-03-20	#NULL!	0	0	0	0		2		0	0	2014-03-28	5	5	2	28	18.2	18.2	18.2	107.2	107.2	107.2	50.8	51	50.9	15.8373	112	103	101	107.5	106.5	102	62	63	65	62.5	63.5	64	80	80	79	79
168	MK	M	1	LE PALMIER	2	1	KAMPEMBA	2010-06-02	#NULL!	0	0	0	0		2		0	0	2014-03-28	3	4	2	27	19.7	19.8	19.75	106	106	106	58.6	58.6	58.6	17.5774	116	113	117	114.5	116.5	115	68	64	63	66	65.5	63.5	82	81	80	100
169	KT	M	1	LE PALMIER	3	1	KAMPEMBA	2008-07-09	#NULL!	0	0	0	0		2		0	0	2014-03-28	5	5.9	2	27	17.5	17.5	17.5	107	107	107	42.9	42.9	42.9	15.2852	113	112	111	112.5	112	111.5	58	74	76	66	67	75	83	85	87	108
200	MK	F	0	LE PALMIER	15	1	KAMPEMBA	1996-07-20	3700	0	0	0	0		2		0	0	2014-03-22	17	17.9	5	27	53.7	59.7	56.7	161.7	161.6	161.65	63	63	63	21.6986	125	116	126	120.5	125.5	121	67	62	64	64.5	65.5	63	90	82	86	76
226	NB	F	0	LE PALMIER	14	1	KAMPEMBA	1996-07-27	#NULL!	0	0	0	0		2		0	0	2014-03-22	17	17.9	5	27	57.4	57.4	57.4	161.8	161.8	161.8	67	67	67	21.9258	134	131	125	132.5	129.5	128	86	82	87	84	86.5	84.5	106	107	105	72
228	KN	F	0	LE PALMIER	14	1	KAMPEMBA	1996-05-25	3500	0	0	0	0		2		0	1	2014-03-22	17	17.9	5	27	54.3	54.3	54.3	157	157	157	69	69	69	22.0293	122	121	117	121.5	119.5	119	70	65	58	67.5	64	61.5	93	85	82	69
230	BS	F	0	LE PALMIER	14	1	ANNEXE	1996-05-28	#NULL!	0	0	0	0		2		0	0	2014-03-22	17	17.9	5	26	51.8	51.7	51.75	154.3	154.3	154.3	66	66	66	21.7359	136	130	128	133	132	129	87	73	80	80	83.5	76.5	108	101	102	93
232	KM	M	1	LE PALMIER	14	1	KAMPEMBA	1996-08-28	#NULL!	0	0	0	0		2		0	0	2014-03-22	17	17.8	5	27	63.5	63.5	63.5	169.9	169.9	169.9	71	71	71	21.9982	131	128	130	129.5	130.5	129	70	82	75	76	72.5	78.5	94	97	98	75
233	KK	M	1	LE PALMIER	14	1	KAMPEMBA	1996-07-27	3500	0	0	0	0		2		0	0	2014-03-24	17	17.9	5	29	63.3	63.3	63.3	174.8	174.8	174.8	70.4	70.4	70.4	20.7167	123	119	121	121	122	120	75	73	79	74	77	76	93	90	89	70
235	LK	M	1	LE PALMIER	13	1	KAMPEMBA	1996-08-15	3500	0	0	0	0		2		0	0	2014-03-26	17	17.9	5	27	49.2	49.9	49.55	160.4	160.5	160.45	64.8	64.9	64.85	19.2471	120	121	117	120.5	118.5	119	80	73	62	76.5	71	67.5	97	91	82	76
236	MO	M	1	LE PALMIER	11	1	KAMPEMBA	1996-06-30	#NULL!	0	0	0	0		2		0	0	2014-03-20	17	17.9	5	27	62.8	62.8	62.8	168.6	168.6	168.6	73	73	73	22.0925	143	143	134	143	138.5	138.5	77	86	85	81.5	81	85.5	101	112	107	82
237	MB	F	0	LE PALMIER	12	1	RUASHI	1996-09-20	#NULL!	0	0	0	0		2		0	0	2014-03-24	17	17.8	5	28	62.5	62.6	62.55	157.9	157.9	157.9	80.2	80.2	80.2	25.0878	120	109	115	114.5	117.5	112	67	59	67	63	67	63	98	82	82	65
238	ON	F	0	LE PALMIER	15	1	KAMPEMBA	1996-08-10	#NULL!	0	0	0	0		2		0	0	2014-03-24	17	17.9	5	28	47.9	47.9	47.9	162.2	162.3	162.25	58.4	58.5	58.45	18.1956	107	107	99	107	103	103	67	58	66	62.5	66.5	62	81	75	77	72
239	MK	F	0	LE PALMIER	10	1	KAMPEMBA	2002-07-11	3000	0	0	0	0		2		0	0	2014-03-26	11	11.9	4	28	33.3	33.3	33.3	146.8	146.8	146.8	52.4	52.4	52.4	15.4523	111	118	120	114.5	115.5	119	68	62	76	65	72	69	89	85	89	97
240	KP	M	1	LE PALMIER	10	1	KAMPEMBA	2002-09-07	#NULL!	0	0	0	0		2		0	0	2014-03-26	11	11.9	4	27	32.7	32.7	32.7	138.8	138.6	138.7	56.2	56.1	56.15	16.9979	129	119	114	124	121.5	116.5	59	71	54	65	56.5	62.5	88	89	79	106
241	MM	F	0	LE PALMIER	10	1	KAMPEMBA	2000-08-19	3100	0	0	0	0		2		0	0	2014-03-26	13	13.9	4	27	45.5	45.5	45.5	147.8	147.6	147.7	68.3	68.4	68.35	20.8569	103	103	106	103	104.5	104.5	55	50	53	52.5	54	51.5	75	72	78	58
242	MB	M	1	LE PALMIER	10	1	KAMPEMBA	2001-08-16	3800	0	0	0	0		2		0	0	2014-03-26	12	12.9	4	28	37.3	37.3	37.3	141.9	141.9	141.9	53.7	53.8	53.75	18.5244	93	104	104	98.5	98.5	104	64	68	64	66	64	66	79	80	77	64
243	NL	F	0	LE PALMIER	10	1	KAMPEMBA	1998-02-15	3000	0	0	0	0		2		0	0	2014-03-26	16	16.1	5	28	49.8	50.2	50	154.5	154.6	154.55	62.6	62.6	62.6	20.933	111	117	114	114	112.5	115.5	70	76	67	73	68.5	71.5	85	94	86	73
244	MA	F	0	LE PALMIER	10	1	ANNEXE	2002-10-09	#NULL!	0	0	0	0		2		0	0	2014-03-26	11	11.8	4	28	37.2	37.4	37.3	146.6	146.4	146.5	58.1	58.2	58.15	17.3794	105	105	108	105	106.5	106.5	70	67	60	68.5	65	63.5	89	86	77	81
245	KM	M	1	LE PALMIER	10	1	KAMPEMBA	2000-08-04	3800	0	0	0	0		2		0	0	2014-03-26	13	13.9	4	28	35.3	35.4	35.35	148	148	148	57.8	58.9	58.35	16.1386	96	93	92	94.5	94	92.5	64	55	52	59.5	58	53.5	81	66	65	88
246	ML	M	1	LE PALMIER	10	1	KAMPEMBA	1999-07-07	#NULL!	0	0	0	0		2		0	0	2014-03-26	14	14.9	5	28	49.8	50	49.9	152.7	152.7	152.7	64	63.9	63.95	21.4004	118	119	111	118.5	114.5	115	81	61	64	71	72.5	62.5	97	85	82	98
247	KL	F	0	LE PALMIER	10	1	KAMPEMBA	2000-12-25	3500	0	0	0	0		2		0	0	2014-03-26	13	13.7	4	28	52	51.9	51.95	160.6	160.6	160.6	65.4	65.3	65.35	20.1416	108	113	110	110.5	109	111.5	63	50	51	56.5	57	50.5	83	77	73	74
248	LL	M	1	LE PALMIER	10	1	KAMPEMBA	1999-07-17	4100	0	0	0	0		2		0	0	2014-03-26	14	14.9	5	28	48.6	48.4	48.5	155.4	155.4	155.4	64.3	64.3	64.3	20.0835	114	120	123	117	118.5	121.5	71	77	77	74	74	77	88	93	91	90
249	KM	M	1	LE PALMIER	10	1	KAMPEMBA	2001-01-06	3300	0	0	0	0		2		0	0	2014-03-26	13	13.1	4	28	30.7	30.7	30.7	136.2	136.5	136.35	57.1	57.2	57.15	16.5131	112	117	121	114.5	116.5	119	74	72	82	73	78	77	90	88	97	69
250	MM	M	1	LE PALMIER	10	1	KAMPEMBA	2000-03-13	2850	0	0	0	0		2		0	0	2014-03-26	14	14	5	28	56	55.9	55.95	161.3	161.3	161.3	64.9	65	64.95	21.5046	131	129	122	130	126.5	125.5	77	70	66	73.5	71.5	68	97	91	89	71
251	NK	F	0	LE PALMIER	10	1	KAMPEMBA	2000-03-14	#NULL!	0	0	0	0		2		0	0	2014-03-26	14	14	5	28	47.4	47.9	47.65	146.7	146.5	146.6	61.9	62	61.95	22.1715	116	112	115	114	115.5	113.5	74	59	54	66.5	64	56.5	89	80	78	89
252	MK	F	0	LE PALMIER	10	1	KAMPEMBA	2002-03-30	#NULL!	0	0	0	0		2		0	0	2014-03-26	11	12	4	29	44.3	44.5	44.4	163.2	163.3	163.25	54.6	54.8	54.7	16.6601	109	107	108	108	108.5	107.5	59	58	58	58.5	58.5	58	80	76	77	72
253	IK	F	0	LE PALMIER	10	1	RUASHI	1998-02-20	3600	0	0	0	0		2		0	0	2014-03-25	16	16	5	27	39.8	39.9	39.85	144.6	144.6	144.6	60.4	60.4	60.4	19.0586	108	106	101	107	104.5	103.5	62	63	59	62.5	60.5	61	79	80	79	78
254	KL	M	1	LE PALMIER	10	1	RUASHI	1999-07-16	3500	0	0	0	0		2		0	0	2014-03-25	14	14.9	5	27	51.8	51.9	51.85	157.5	157.6	157.55	68.4	68.4	68.4	20.8887	114	108	106	111	110	107	60	52	66	56	63	59	84	75	84	55
255	KM	M	1	LE PALMIER	10	1	KAMPEMBA	2000-11-28	3000	0	0	0	0		2		0	0	2014-03-25	13	13.8	4	27	35.6	35.7	35.65	145.7	145.7	145.7	56.4	56.4	56.4	16.7935	124	115	110	119.5	117	112.5	73	72	52	72.5	62.5	62	86	86	81	63
256	TM	F	0	LE PALMIER	10	1	KAMPEMBA	1999-09-27	3000	0	0	0	0		2		0	0	2014-03-27	14	14.8	5	28	45.4	45.3	45.35	149.4	149.4	149.4	66.2	66.2	66.2	20.3178	113	105	96	109	104.5	100.5	70	54	59	62	64.5	56.5	84	76	74	64
257	NK	F	0	LE PALMIER	10	1	RUASHI	2000-02-10	2600	0	0	0	0		2		0	0	2014-03-27	14	14.1	5	28	46.4	46.4	46.4	157.8	157.8	157.8	69	69	69	18.6339	118	108	107	113	112.5	107.5	70	66	67	68	68.5	66.5	86	84	84	87
258	MM	F	0	LE PALMIER	10	1	KAMPEMBA	2001-09-15	4500	0	0	0	0		2		0	0	2014-03-27	12	12.9	4	27	52.4	50.4	51.4	146.3	146.3	146.3	67	67	67	24.0146	121	117	109	119	115	113	68	78	63	73	65.5	70.5	88	90	83	86
259	TK	M	1	LE PALMIER	10	1	KAMPEMBA	2000-01-16	3800	0	0	0	0		2		0	0	2014-03-27	14	14.1	5	30	54.9	55	54.95	158	158	158	74.2	74.2	74.2	22.0117	134	129	124	131.5	129	126.5	74	70	75	72	74.5	72.5	90	96	97	110
260	MM	M	1	LE PALMIER	10	1	KAMPEMBA	2001-04-21	3500	0	0	0	0		2		0	0	2014-03-27	12	13	4	28	34.8	34.8	34.8	143.6	143.6	143.6	59.2	59.2	59.2	16.876	132	121	124	126.5	128	122.5	93	102	100	97.5	96.5	101	106	109	108	97
261	MM	F	0	LE PALMIER	10	1	KAMPEMBA	2002-05-10	#NULL!	0	0	0	0		2		0	0	2014-03-27	11	12	4	28	51.2	51.1	51.15	153.9	153.9	153.9	72.4	72.4	72.4	21.5958	130	115	117	122.5	123.5	116	66	70	74	68	70	72	92	91	89	83
262	KM	F	0	LE PALMIER	10	1	KAMPEMBA	2000-01-02	#NULL!	0	0	0	0		2		1	0	2014-03-27	14	14.1	5	27	61.7	61.7	61.7	159.2	159.2	159.2	78.5	78.5	78.5	24.3444	130	126	124	128	127	125	82	74	73	78	77.5	73.5	105	100	96	84
263	TM	F	0	LE PALMIER	10	1	ANNEXE	2002-11-24	4500	0	0	0	0		2		1	1	2014-03-27	11	11.8	4	28	43	42.9	42.95	153.9	153.9	153.9	65.2	65.2	65.2	18.1337	118	108	102	113	110	105	60	66	60	63	60	63	78	82	77	91
264	LK	M	1	LE PALMIER	10	1	KAMPEMBA	1999-01-15	3500	0	0	0	0		2		0	0	2014-03-27	15	15.1	5	27	47.1	47.1	47.1	157	157	157	69.2	69.2	69.2	19.1083	116	111	108	113.5	112	109.5	67	65	63	66	65	64	88	80	83	70
265	MK	F	0	LE PALMIER	10	1	KAMPEMBA	2000-03-23	3300	0	0	0	0		2		0	0	2014-03-27	14	14	5	29	50.1	50.1	50.1	153.7	153.7	153.7	73.4	73.4	73.4	21.2075	118	112	108	115	113	110	68	64	60	66	64	62	88	80	77	78
266	KL	M	1	LE PALMIER	10	1	KAMPEMBA	1999-10-28	2700	0	0	0	0		2		0	0	2014-03-27	14	14.8	5	27	51.2	51.3	51.25	160.3	160.3	160.3	73.2	73.2	73.2	19.9447	125	125	122	125	123.5	123.5	66	69	66	67.5	66	67.5	97	93	92	60
267	NV	F	0	LE PALMIER	10	1	KAMPEMBA	2001-06-28	3200	0	0	0	0		2		1	0	2014-03-27	12	12.9	4	28	46.2	46.2	46.2	144.9	144.9	144.9	68.2	68.2	68.2	22.0042	107	104	103	105.5	105	103.5	67	65	66	66	66.5	65.5	81	81	83	111
268	MM	F	0	LE PALMIER	10	1	KAMPEMBA	2000-11-11	2500	0	0	0	0		2		1	0	2014-03-27	13	13.8	4	28	59.2	59.2	59.2	165.5	165.5	165.5	72.2	72.2	72.2	21.6135	134	123	122	128.5	128	122.5	76	70	77	73	76.5	73.5	101	89	93	102
269	TM	F	0	LE PALMIER	10	1	KAMPEMBA	2001-11-23	2800	0	0	0	0		2		0	0	2014-03-27	12	12.8	4	28	52.9	52.9	52.9	158.5	158.5	158.5	74.5	74.5	74.5	21.057	97	96	99	96.5	98	97.5	63	61	58	62	60.5	59.5	80	75	82	81
270	BB	M	1	LE PALMIER	10	1	KAMPEMBA	1999-02-28	#NULL!	0	0	0	0		2		0	0	2014-03-26	15	15	5	27	47.2	47.5	47.35	151.7	151.7	151.7	58.9	58.9	58.9	20.5754	125	117	119	121	122	118	71	63	66	67	68.5	64.5	90	86	87	66
271	TL	M	1	LE PALMIER	10	1	KAMPEMBA	2002-02-12	#NULL!	0	0	0	0		2		1	1	2014-03-26	12	12.1	4	28	28.4	28.6	28.5	132.7	132.4	132.55	56.7	56.6	56.65	16.2213	90	94	92	92	91	93	47	54	54	50.5	50.5	54	73	67	67	69
272	F	F	0	LE PALMIER	10	1	KAMPEMBA	2002-06-01	#NULL!	0	0	0	0		2		0	0	2014-03-26	11	12	4	28	35.3	35.4	35.35	141	141.2	141.1	54.4	54.4	54.4	17.7556	100	106	107	103	103.5	106.5	56	57	46	56.5	51	51.5	76	79	68	71
273	KM	F	0	LE PALMIER	10	1	KAMPEMBA	2001-04-14	#NULL!	0	0	0	0		2		0	0	2014-03-26	12	13	4	28	43.7	43.6	43.65	150	149.9	149.95	55.7	55.7	55.7	19.4129	123	115	113	119	118	114	58	61	68	59.5	63	64.5	89	81	89	80
274	NM	M	1	LE PALMIER	10	1	KAMPEMBA	2001-03-09	#NULL!	0	0	0	0		2		0	0	2014-03-26	13	13	4	28	26.9	27	26.95	133.7	133.7	133.7	54.5	54.5	54.5	15.0763	100	91	86	95.5	93	88.5	50	51	51	50.5	50.5	51	71	67	62	70
275	BI	F	0	LE PALMIER	10	1	KAMPEMBA	2000-03-03	#NULL!	0	0	0	0		2		0	0	2014-03-26	14	14.1	5	28	53.9	53.5	53.7	147.4	147.6	147.5	70.2	70.4	70.3	24.6826	148	131	129	139.5	138.5	130	68	64	63	66	65.5	63.5	99	90	88	99
276	TW	M	1	LE PALMIER	10	1	KAMPEMBA	2002-01-14	#NULL!	0	0	0	0		2		1	1	2014-03-26	12	12.1	4	28	40.5	40.5	40.5	147.2	147.4	147.3	55.8	55.9	55.85	18.6659	130	123	117	126.5	123.5	120	66	68	58	67	62	63	100	89	84	60
277	KI	F	0	LE PALMIER	10	1	KAMPEMBA	1999-07-02	#NULL!	0	0	0	0		2		0	0	2014-03-26	14	14.9	5	28	50.7	51	50.85	149.6	149.6	149.6	68.9	69	68.95	22.721	106	109	109	107.5	107.5	109	67	65	63	66	65	64	84	84	82	74
278	TR	F	0	LE PALMIER	10	1	KAMPEMBA	1999-04-24	#NULL!	0	0	0	0		2		0	0	2014-03-27	14	15	5	27	52.3	52.3	52.3	157.4	157.4	157.4	73.1	73.1	73.1	21.1102	124	128	120	126	122	124	79	77	72	78	75.5	74.5	97	94	92	84
279	MK	F	0	LE PALMIER	10	1	KAMPEMBA	2000-09-10	#NULL!	0	0	0	0		2		0	0	2014-03-27	13	13.9	4	27	47.9	47.9	47.9	155.4	155.4	155.4	68.3	68.3	68.3	19.8351	98	104	103	101	100.5	103.5	61	73	68	67	64.5	70.5	82	84	82	73
280	KK	M	1	LE PALMIER	11	1	KAMPEMBA	2001-01-15	2500	0	0	0	0		2		0	0	2014-03-19	13	13.1	4	27	36.6	36.6	36.6	158.1	158.1	158.1	59	59	59	14.6426	99	98	101	98.5	100	99.5	66	64	79	65	72.5	71.5	79	79	74	72
281	TM	M	1	LE PALMIER	11	1	KAMPEMBA	1999-06-18	3000	0	0	0	0		2		0	0	2014-03-19	14	14.9	5	27	69.3	69.3	69.3	175.5	175.5	175.5	75	75	75	22.4998	129	122	123	125.5	126	122.5	60	53	54	56.5	57	53.5	85	80	79	62
282	NK	M	1	LE PALMIER	11	1	KAMPEMBA	2002-07-05	#NULL!	0	0	0	0		2		1	0	2014-03-19	11	11.9	4	27	40.6	40.6	40.6	159.3	159.3	159.3	59	59	59	15.9991	136	131	125	133.5	130.5	128	71	72	70	71.5	70.5	71	100	102	92	71
283	NS	F	0	LE PALMIER	11	1	KAMPEMBA	1999-11-21	3400	0	0	0	0		2		1	1	2014-03-19	14	14.8	5	29	45.1	45.1	45.1	158	158	158	64	64	64	18.066	107	117	114	112	110.5	115.5	67	74	62	70.5	64.5	68	88	93	80	67
284	LN	M	1	LE PALMIER	11	1	KAMPEMBA	2001-03-09	#NULL!	0	0	0	0		2		0	0	2014-03-19	13	13	4	27	40.1	40.1	40.1	152	152	152	61	61	61	17.3563	107	105	103	106	105	104	73	58	71	65.5	72	64.5	82	79	80	87
285	KK	F	0	LE PALMIER	11	1	KAMPEMBA	1997-12-13	3000	0	0	0	0		2		0	0	2014-03-19	16	16.7	5	27	50.5	50.7	50.6	164	164	164	65	65	65	18.8132	119	118	119	118.5	119	118.5	70	65	70	67.5	70	67.5	88	86	87	65
286	KD	F	0	LE PALMIER	11	1	KAMPEMBA	1998-04-06	2800	0	0	0	0		2		1	0	2014-03-20	15	16	5	27	61.3	61.3	61.3	159	159	159	71	71	71	24.2475	115	111	107	113	111	109	78	79	61	78.5	69.5	70	94	89	78	84
287	KK	F	0	LE PALMIER	11	1	RUASHI	1999-09-17	2800	0	0	0	0		2		0	0	2014-03-20	14	14.8	5	27	46.6	46.6	46.6	150	150	150	64	64	64	20.7111	124	131	130	127.5	127	130.5	72	71	69	71.5	70.5	70	101	95	89	89
289	IM	F	0	LE PALMIER	11	1	KAMPEMBA	1997-03-11	3550	0	0	0	0		2		0	0	2014-03-20	17	17	5	27	57.9	57.7	57.8	169.3	169.1	169.2	63	63	63	20.1896	111	125	130	118	120.5	127.5	78	71	65	74.5	71.5	68	93	100	87	91
289	NN	M	1	LE PALMIER	11	1	KAMPEMBA	1997-03-15	3000	0	0	0	0		2		0	0	2014-03-20	17	17	5	27	57.9	57.9	57.9	169.3	169.1	169.2	63	63	63	20.2245	99	105	101	102	100	103	65	73	61	69	63	67	80	85	83	79
290	MN	M	1	LE PALMIER	11	1	KAMPEMBA	1999-09-04	4000	0	0	0	0		2		1	0	2014-03-20	14	14.9	5	27	37.1	37	37.05	147	147	147	62	62	62	17.1456	100	102	100	101	100	101	55	57	53	56	54	55	71	76	71	62
291	BN	F	0	LE PALMIER	11	1	KAMPEMBA	1999-11-14	5000	0	0	0	0		#NULL!		0	0	2014-03-20	14	14.8	5	27	58.1	58.1	58.1	158.5	158.5	158.5	68	68	68	23.1269	110	118	122	114	116	120	72	65	72	68.5	72	68.5	90	82	97	86
292	TM	F	0	LE PALMIER	11	1	KAMPEMBA	1997-04-14	#NULL!	0	0	0	0		2		0	1	2014-03-20	16	17	5	27	59.3	59.3	59.3	158.7	158.5	158.6	72	72	72	23.5748	109	113	109	111	109	111	79	70	71	74.5	75	70.5	89	84	87	79
293	MK	F	0	LE PALMIER	11	1	KAMPEMBA	1998-01-19	2500	0	0	0	0		2		0	0	2014-03-19	16	16.1	5	27	45.5	45.5	45.5	157	157	157	65	65	65	18.4592	96	97	105	96.5	100.5	101	58	59	57	58.5	57.5	58	73	76	73	78
294	LL	F	0	LE PALMIER	11	1	KAMPEMBA	1999-01-01	2900	0	0	0	0		2		0	0	2014-03-19	15	15.1	5	27	56.2	56.2	56.2	164.1	164.2	164.15	66	66	66	20.8571	144	139	139	141.5	141.5	139	81	88	79	84.5	80	83.5	103	104	102	93
295	MK	F	0	LE PALMIER	11	1	KAMPEMBA	1999-01-04	3200	0	0	0	0		2		1	1	2014-03-19	15	15.1	5	27	53.7	53.7	53.7	155	155	155	72	72	72	22.3517	137	135	136	136	136.5	135.5	80	83	81	81.5	80.5	82	107	104	108	77
296	TM	M	1	LE PALMIER	11	1	KAMPEMBA	1999-11-27	4200	0	0	0	0		2		0	0	2014-03-19	14	14.7	5	27	35.5	35.5	35.5	141	141	141	60	60	60	17.8562	110	107	105	108.5	107.5	106	71	75	66	73	68.5	70.5	86	87	80	70
297	MM	F	0	LE PALMIER	11	1	KAMPEMBA	2000-12-25	3500	0	0	0	0		2		0	0	2014-03-19	13	13.7	4	27	67.7	67.7	67.7	155.6	155.4	155.5	85	85	85	27.9981	126	126	117	126	121.5	121.5	78	78	81	78	79.5	79.5	97	92	95	75
298	MM	F	0	LE PALMIER	11	1	KAMPEMBA	2000-01-31	2600	0	0	0	0		2		1	1	2014-03-19	14	14	5	27	45.8	46	45.9	153	153	153	65	65	65	19.6078	105	102	105	103.5	105	103.5	64	57	48	60.5	56	52.5	82	75	74	84
299	MK	M	1	LE PALMIER	11	1	KAMPEMBA	1999-05-25	3200	0	0	0	0		2		0	0	2014-03-27	14	14.9	5	31	43.4	43.5	43.45	145.1	145.1	145.1	68.2	68.2	68.2	20.6374	111	102	100	106.5	105.5	101	70	67	56	68.5	63	61.5	83	79	73	80
300	NA	F	0	LE PALMIER	11	1	KAMPEMBA	1999-10-23	2900	0	0	0	0		2		0	0	2014-03-27	14	14.8	5	27	70.4	70.4	70.4	181.2	181.2	181.2	79.1	79.1	79.1	21.4416	137	120	112	128.5	124.5	116	65	60	56	62.5	60.5	58	94	81	82	98
301	MB	F	0	LE PALMIER	11	1	KAMPEMBA	2000-05-26	3000	0	0	0	0		2		0	0	2014-03-27	13	13.9	4	27	47.3	47.2	47.25	154.8	154.8	154.8	65.1	65.1	65.1	19.7179	118	108	110	113	114	109	65	62	68	63.5	66.5	65	84	82	84	63
302	KK	F	0	LE PALMIER	11	1	KAMPEMBA	2000-07-17	2900	0	0	0	0		2		0	1	2014-03-19	13	13.9	4	27	66.7	66.7	66.7	150.5	150.5	150.5	80	80	80	29.4478	125	114	116	119.5	120.5	115	67	76	66	71.5	66.5	71	88	94	86	87
303	MK	M	1	LE PALMIER	11	1	KAMPEMBA	2000-07-22	3200	0	0	0	0		2		0	0	2014-03-19	13	13.9	4	27	41.5	41.5	41.5	165.3	165.3	165.3	60	60	60	15.1881	114	118	115	116	114.5	116.5	74	75	76	74.5	75	75.5	93	92	90	67
304	YO	M	1	LE PALMIER	11	1	KAMPEMBA	1999-08-28	3100	0	0	0	0		2		0	0	2014-03-21	14	14.8	5	28	39.7	39.7	39.7	158.2	158.2	158.2	60	60	60	15.8627	124	117	106	120.5	115	111.5	67	73	68	70	67.5	70.5	90	89	87	67
305	IM	M	1	LE PALMIER	11	1	KAMPEMBA	2000-05-20	2000	0	0	0	0		2		0	0	2014-03-20	13	13.9	4	27	39.3	39.3	39.3	157.3	157.3	157.3	55	55	55	15.8831	109	114	105	111.5	107	109.5	61	62	61	61.5	61	61.5	79	81	81	76
306	KK	F	0	LE PALMIER	11	1	ANNEXE	2000-07-10	#NULL!	0	0	0	0		2		0	0	2014-03-20	13	13.9	4	27	36.7	36.7	36.7	163.7	163.5	163.6	57	57	57	13.712	125	121	122	123	123.5	121.5	71	75	88	73	79.5	81.5	98	95	99	94
307	KK	F	0	LE PALMIER	11	1	KAMPEMBA	1999-12-25	#NULL!	0	0	0	0		2		0	0	2014-03-20	14	14.7	5	27	52.7	52.7	52.7	156.1	156	156.05	66	66	66	21.6413	113	109	109	111	111	109	60	61	58	60.5	59	59.5	82	84	79	56
308	NM	M	1	LE PALMIER	11	1	RUASHI	1999-05-18	#NULL!	0	0	0	0		2		0	0	2014-03-20	14	14.9	5	27	61.8	61.8	61.8	175.1	175.3	175.2	77	77	77	20.1335	113	121	122	117	117.5	121.5	60	60	59	60	59.5	59.5	81	85	86	62
309	NK	M	1	LE PALMIER	11	1	KAMPEMBA	2000-10-11	#NULL!	0	0	0	0		2		0	0	2014-03-20	13	13.8	4	27	55.1	55.3	55.2	166.2	166.1	166.15	69	69	69	19.9958	138	139	139	138.5	138.5	139	83	73	77	78	80	75	102	96	98	119
310	MK	F	0	LE PALMIER	11	1	RUASHI	1999-07-08	#NULL!	0	0	0	0		2		0	0	2014-03-20	14	14.9	5	27	43.3	43.3	43.3	143.3	143.2	143.25	60	60	60	21.1008	105	104	99	104.5	102	101.5	60	55	68	57.5	64	61.5	76	73	75	76
311	MI	F	0	LE PALMIER	11	1	KAMPEMBA	1999-01-16	#NULL!	0	0	0	0		2		0	0	2014-03-19	15	15.1	5	27	48.2	48.2	48.2	153.5	153.5	153.5	65	65	65	20.4565	114	113	113	113.5	113.5	113	71	59	63	65	67	61	93	79	79	76
312	MN	F	0	LE PALMIER	11	1	KAMPEMBA	1999-08-06	#NULL!	0	0	0	0		2		0	0	2014-03-19	14	14.9	5	27	56.8	56.8	56.8	159	160	159.5	70	70	70	22.3268	132	137	133	134.5	132.5	135	81	77	76	79	78.5	76.5	97	103	99	73
313	SM	M	1	LE PALMIER	11	1	RUASHI	1999-10-25	#NULL!	0	0	0	0		2		0	0	2014-03-19	14	14.8	5	27	49.8	49.8	49.8	154.2	154.2	154.2	70	70	70	20.944	127	122	122	124.5	124.5	122	53	63	56	58	54.5	59.5	87	89	92	72
314	LM	M	1	LE PALMIER	11	1	KAMPEMBA	2000-10-15	#NULL!	0	0	0	0		2		0	0	2014-03-19	13	13.8	4	27	35.7	35.7	35.7	152	152	152	59	59	59	15.4519	117	106	110	111.5	113.5	108	70	67	66	68.5	68	66.5	92	82	81	76
315	MK	F	0	LE PALMIER	11	1	KAMPEMBA	1999-02-27	#NULL!	0	0	0	0		2		0	1	2014-03-19	15	15	5	28	50.6	50.4	50.5	158.7	158.8	158.75	67	67	67	20.0384	126	125	119	125.5	122.5	122	74	69	69	71.5	71.5	69	92	89	90	81
316	MK	F	0	LE PALMIER	11	1	KAMPEMBA	2000-12-04	#NULL!	0	0	0	0		2		0	0	2014-03-19	13	13.8	4	28	53.5	53.4	53.45	156.3	156.5	156.4	71	71	71	21.8511	117	121	127	119	122	124	72	70	77	71	74.5	73.5	89	86	94	77
317	MM	F	0	LE PALMIER	11	1	KAMPEMBA	1996-12-10	#NULL!	0	0	0	0		2		0	0	2014-03-24	17	17.8	5	28	57.9	57.7	57.8	151.3	151.3	151.3	67.2	67.2	67.2	25.2493	113	110	111	111.5	112	110.5	80	74	68	77	74	71	92	89	84	73
318	MS	F	0	LE PALMIER	11	1	KAMPEMBA	2000-05-20	#NULL!	0	0	0	0		2		0	0	2014-03-19	13	13.9	4	27	59.8	59.8	59.8	154	154.1	154.05	75	75	75	25.1987	119	123	113	121	116	118	72	52	62	62	67	57	88	80	81	87
319	MC	M	1	LE PALMIER	11	1	RUASHI	1999-10-15	#NULL!	0	0	0	0		2		0	0	2014-03-19	14	14.8	5	27	46.7	46.7	46.7	160	160	160	64	64	64	18.2422	126	121	114	123.5	120	117.5	72	71	71	71.5	71.5	71	101	93	85	71
320	BI	M	1	LE PALMIER	11	1	RUASHI	1997-12-17	#NULL!	0	0	0	0		2		0	0	2014-03-19	16	16.7	5	27	54.7	53.4	54.05	166	166	166	72	72	72	19.6146	132	124	119	128	125.5	121.5	67	85	62	76	64.5	73.5	66	96	84	77
321	IM	F	0	LE PALMIER	11	1	KAMPEMBA	1998-03-30	#NULL!	0	0	0	0		2		0	0	2014-03-19	15	16	5	27	57.5	57.5	57.5	159	159	159	79	79	79	22.7444	107	112	117	109.5	112	114.5	74	69	67	71.5	70.5	68	93	92	88	77
322	MM	F	0	LE PALMIER	11	1	KAMPEMBA	2000-03-16	#NULL!	0	0	0	0		2		1	0	2014-03-19	14	14	5	27	50	50	50	154	154	154	71.3	71.3	71.3	21.0828	133	111	118	122	125.5	114.5	83	93	72	88	77.5	82.5	106	99	100	86
323	MC	M	1	LE PALMIER	11	1	KAMPEMBA	1996-09-22	#NULL!	0	0	0	0		2		0	0	2014-03-19	17	17.8	5	27	57.7	57.7	57.7	165.1	165.1	165.1	71.2	71.2	71.2	21.1681	112	112	110	112	111	111	69	69	72	69	70.5	70.5	85	82	85	73
324	MA	F	0	LE PALMIER	11	1	KAMPEMBA	1999-09-10	#NULL!	0	0	0	0		2		0	0	2014-03-19	14	14.8	5	27	46.5	46.5	46.5	155.1	155.1	155.1	67	67	67	19.3299	134	128	119	131	126.5	123.5	74	70	70	72	72	70	93	87	90	70
325	MS	F	0	LE PALMIER	11	1	KAMPEMBA	1998-02-12	#NULL!	0	0	0	0		2		0	0	2014-03-19	16	16	5	27	62.6	62.6	62.6	160.5	160.5	160.5	71	71	71	24.301	120	126	119	123	119.5	122.5	72	67	68	69.5	70	67.5	93	85	86	91
326	NM	F	0	LE PALMIER	11	1	ANNEXE	1999-07-15	#NULL!	0	0	0	0		2		0	0	2014-03-19	14	14.9	5	27	46.2	46.2	46.2	150	150	150	60	60	60	20.5333	119	117	111	118	115	114	75	53	64	64	69.5	58.5	85	79	80	72
327	NN	M	1	LE PALMIER	11	1	KAMPEMBA	1999-12-05	#NULL!	0	0	0	0		2		0	0	2014-03-19	14	14.8	5	27	39.3	39.3	39.3	153.5	153.5	153.5	59	59	59	16.6792	112	113	113	112.5	112.5	113	59	60	63	59.5	61	61.5	87	90	85	71
328	KK	F	0	LE PALMIER	11	1	ANNEXE	1999-02-03	#NULL!	0	0	0	0		2		1	0	2014-03-19	15	15.1	5	27	64.3	64.3	64.3	165.1	165.1	165.1	75.3	75.3	75.3	23.5894	106	104	102	105	104	103	59	55	56	57	57.5	55.5	78	72	77	73
329	BB	F	0	LE PALMIER	12	1	KAMPEMBA	1998-05-17	4500	0	0	0	0		2		0	0	2014-03-22	15	16	5	27	63	63	63	161.7	161.7	161.7	71	71	71	24.0946	113	117	112	115	112.5	114.5	72	71	73	71.5	72.5	72	89	90	90	83
330	MM	F	0	LE PALMIER	12	1	RUASHI	1997-07-15	3800	0	0	0	0		2		0	0	2014-03-22	16	16.9	5	23	63.1	63.2	63.15	163.1	163.1	163.1	76	76	76	23.7392	135	130	133	132.5	134	131.5	84	69	85	76.5	84.5	77	103	105	101	75
331	TB	F	0	LE PALMIER	12	1	KAMPEMBA	1999-05-25	4200	0	0	0	0		2		0	0	2014-03-22	14	14.9	5	27	50.8	50.8	50.8	152.3	152.3	152.3	71	71	71	21.901	118	103	102	110.5	110	102.5	72	74	73	73	72.5	73.5	93	86	89	85
332	MN	F	0	LE PALMIER	12	1	KAMPEMBA	1997-09-07	3500	0	0	0	0		2		1	0	2014-03-21	16	16.9	5	23	58.8	58.8	58.8	163.1	163.3	163.2	72	72	72	22.0768	123	131	126	127	124.5	128.5	76	73	70	74.5	73	71.5	103	97	89	79
333	AZ	F	0	LE PALMIER	12	1	KAMPEMBA	1998-03-12	3500	0	0	0	0		2		0	0	2014-03-21	16	16	5	23	49	49.1	49.05	158.4	158.4	158.4	68	68	68	19.5492	113	111	111	112	112	111	71	78	69	74.5	70	73.5	87	88	85	84
334	SM	M	1	LE PALMIER	12	1	KAMPEMBA	1999-06-02	2500	0	0	0	0		2		1	1	2014-03-21	14	15	5	23	49.3	49.3	49.3	163	163	163	69	69	69	18.5555	122	121	110	121.5	116	115.5	66	69	70	67.5	68	69.5	89	87	86	65
335	AM	F	0	LE PALMIER	12	1	KAMPEMBA	1999-01-25	3500	0	0	0	0		2		1	0	2014-03-21	15	15	5	23	56	56	56	166.1	166.2	166.15	69	69	69	20.2856	125	128	119	126.5	122	123.5	69	59	68	64	68.5	63.5	93	84	85	61
336	NM	F	0	LE PALMIER	12	1	KAMPEMBA	1997-08-25	3100	0	0	0	0		2		0	0	2014-03-21	16	16.8	5	23	49.6	49.8	49.7	161.3	161.2	161.25	67	67	67	19.1142	116	119	105	117.5	110.5	112	75	70	74	72.5	74.5	72	93	93	89	83
337	MM	M	1	LE PALMIER	12	1	KAMPEMBA	1998-03-25	#NULL!	0	0	0	0		2		0	0	2014-03-25	16	16	5	26	59.1	59.6	59.35	167.5	167.4	167.45	66.5	66.6	66.55	21.1666	126	125	113	125.5	119.5	119	85	72	76	78.5	80.5	74	104	92	92	57
338	KN	F	0	LE PALMIER	12	1	KAMPEMBA	1998-07-04	3800	0	0	0	0		2		0	0	2014-03-25	15	15.9	5	26	45.2	45.2	45.2	159.6	159.6	159.6	67.8	67.8	67.8	17.7449	98	106	100	102	99	103	66	67	66	66.5	66	66.5	83	81	77	105
339	MK	F	0	LE PALMIER	12	1	KAMPEMBA	1997-04-28	3800	0	0	0	0		2		0	0	2014-03-25	16	17	5	27	64.2	64.2	64.2	163.7	163.7	163.7	76.6	76.6	76.6	23.9573	144	110	116	127	130	113	75	80	71	77.5	73	75.5	91	95	92	65
340	TK	F	0	LE PALMIER	12	1	KAMPEMBA	1998-03-03	4900	0	0	0	0		2		0	0	2014-03-25	16	16.1	5	27	63.1	63.8	63.45	161.9	161.9	161.9	73.8	78.8	76.3	24.2068	104	99	99	101.5	101.5	99	55	55	48	55	51.5	51.5	78	71	66	81
341	YS	M	1	LE PALMIER	12	1	KAMPEMBA	1998-03-03	4000	0	0	0	0		2		0	0	2014-03-24	16	16.1	5	27	58	58	58	160.5	160.5	160.5	76.5	76.5	76.5	22.5153	124	116	124	120	124	120	84	80	87	82	85.5	83.5	99	96	97	54
342	MB	F	0	LE PALMIER	12	1	KAMPEMBA	1998-01-06	3500	0	0	0	0		2		0	0	2014-03-24	16	16.1	5	28	51	51	51	163.7	163.7	163.7	61.5	61.5	61.5	19.0315	115	114	114	114.5	114.5	114	63	60	63	61.5	63	61.5	83	79	82	81
343	KM	F	0	LE PALMIER	12	1	KAMPEMBA	1997-08-20	#NULL!	0	0	0	0		2		0	0	2014-03-22	16	16.9	5	27	58.2	58.3	58.25	160.5	160.5	160.5	72	72	72	22.6124	120	110	117	115	118.5	113.5	65	58	61	61.5	63	59.5	86	82	84	72
344	KK	M	1	LE PALMIER	12	1	KAMPEMBA	1998-12-16	#NULL!	0	0	0	0		2		0	0	2014-03-21	15	15.7	5	22	57.8	57.8	57.8	161.9	162	161.95	70	70	70	22.0377	116	132	134	124	125	133	77	74	66	75.5	71.5	70	94	92	94	70
345	MM	F	0	LE PALMIER	12	1	RUASHI	1997-08-08	#NULL!	0	0	0	0		2		1	1	2014-03-21	16	16.9	5	23	50.2	50.2	50.2	163.2	163.2	163.2	67	67	67	18.8479	126	111	120	118.5	123	115.5	68	76	72	72	70	74	90	89	88	88
346	KK	M	1	LE PALMIER	12	1	KAMPEMBA	1998-12-08	#NULL!	0	0	0	0		2		0	0	2014-03-21	15	15.8	5	23	58.6	58.6	58.6	163.2	163.1	163.15	70	70	70	22.0152	130	132	131	131	130.5	131.5	66	69	62	67.5	64	65.5	100	97	94	72
347	NT	F	0	LE PALMIER	12	1	KAMPEMBA	1998-12-16	#NULL!	0	0	0	0		2		0	0	2014-03-21	15	15.7	5	23	56.4	56.4	56.4	160.4	160.4	160.4	71	71	71	21.9215	134	126	121	130	127.5	123.5	84	80	85	82	84.5	82.5	109	107	102	73
348	LM	F	0	LE PALMIER	12	1	KAMPEMBA	1997-12-27	#NULL!	0	0	0	0		2		0	0	2014-03-21	16	16.7	5	23	55.2	55.2	55.2	154.5	154.5	154.5	66	66	66	23.125	104	96	102	100	103	99	65	64	66	64.5	65.5	65	84	74	78	63
349	KT	F	0	LE PALMIER	12	1	RUASHI	1998-12-25	#NULL!	0	0	0	0		2		0	0	2014-03-21	15	15.7	5	23	50.1	50.1	50.1	164.7	164.7	164.7	63	63	63	18.4693	112	109	112	110.5	112	110.5	62	65	66	63.5	64	65.5	85	86	79	77
350	MM	F	0	LE PALMIER	12	1	KAMPEMBA	1999-02-20	#NULL!	0	0	0	0		2		0	0	2014-03-21	15	15	5	23	46.5	46.5	46.5	155.9	155.9	155.9	63	63	63	19.132	127	114	124	120.5	125.5	119	73	67	71	70	72	69	96	86	90	84
351	LK	F	0	LE PALMIER	12	1	RUASHI	1999-10-13	#NULL!	0	0	0	0		2		0	0	2014-03-25	14	14.8	5	27	52.9	52.9	52.9	159	159	159	72.7	72.9	72.8	20.9248	110	106	103	108	106.5	104.5	65	62	60	63.5	62.5	61	82	83	82	69
352	KK	M	1	LE PALMIER	12	1	KAMPEMBA	1998-07-01	#NULL!	0	0	0	0		2		0	0	2014-03-25	15	15.9	5	27	63.4	63.4	63.4	168.6	168.7	168.65	70.4	70.4	70.4	22.2903	116	110	110	113	113	110	76	59	59	67.5	67.5	59	91	82	85	67
353	MY	M	1	LE PALMIER	12	1	KAMPEMBA	1998-07-31	#NULL!	0	0	0	0		2		0	0	2014-03-25	15	15.9	5	27	52.8	53	52.9	169.8	169.9	169.85	69.5	69.5	69.5	18.3368	117	116	113	116.5	115	114.5	78	71	75	74.5	76.5	73	91	89	92	80
354	KK	F	0	LE PALMIER	12	1	KAMPEMBA	1998-08-30	#NULL!	0	0	0	0		2		0	0	2014-03-22	15	15.8	5	27	43.5	43.4	43.45	151.5	151.5	151.5	69	69	69	18.9306	110	113	110	111.5	110	111.5	71	74	80	72.5	75.5	77	91	89	89	55
355	MK	F	0	LE PALMIER	12	1	KAMPEMBA	1998-08-30	#NULL!	0	0	0	0		2		0	0	2014-03-22	15	15.8	5	27	52.3	52.3	52.3	158	158	158	70	70	70	20.9502	107	106	107	106.5	107	106.5	70	70	62	70	66	66	84	84	80	61
356	TM	F	0	LE PALMIER	13	1	KAMPEMBA	1997-08-15	3500	0	0	0	0		2		0	1	2014-03-26	16	16.9	5	29	61.2	61.2	61.2	163.2	163.1	163.15	76.1	76.1	76.1	22.992	127	121	118	124	122.5	119.5	67	64	66	65.5	66.5	65	93	90	87	86
357	NE	F	0	LE PALMIER	13	1	KAMPEMBA	1998-07-17	2900	0	0	0	0		2		0	1	2014-03-27	15	15.9	5	28	43.6	43.6	43.6	151.8	151.8	151.8	68	68	68	18.921	119	108	118	113.5	118.5	113	75	61	60	68	67.5	60.5	91	82	85	52
358	MA	F	0	LE PALMIER	13	1	KAMPEMBA	1997-05-25	3200	0	0	0	0		2		0	0	2014-03-27	16	16.9	5	28	66.5	66.6	66.55	148.2	148.2	148.2	82.5	82.5	82.5	30.3006	108	117	114	112.5	111	115.5	73	69	64	71	68.5	66.5	91	89	81	75
359	TK	F	0	LE PALMIER	13	1	KAMPEMBA	1997-01-30	3100	0	0	0	0		2		0	0	2014-03-27	17	17.1	5	28	49.4	49.5	49.45	162.5	162.5	162.5	68	68	68	18.7266	133	118	124	125.5	128.5	121	79	80	75	79.5	77	77.5	102	96	93	79
360	MS	F	0	LE PALMIER	13	1	KAMPEMBA	1997-05-08	2800	0	0	0	0		2		0	0	2014-03-27	16	17	5	28	66.1	66	66.05	160.9	190.9	175.9	81.1	81.1	81.1	21.3472	118	113	112	115.5	115	112.5	68	77	64	72.5	66	70.5	86	93	86	83
361	KK	F	0	LE PALMIER	13	1	KAMPEMBA	1997-11-27	3100	0	0	0	0		2		0	0	2014-03-27	16	16.8	5	28	51.1	51.2	51.15	148.1	148.1	148.1	73	73	73	23.3204	128	129	131	128.5	129.5	130	82	79	71	80.5	76.5	75	99	96	95	77
363	MM	M	1	LE PALMIER	13	1	KAMPEMBA	1998-07-07	3900	0	0	0	0		2		0	0	2014-03-27	15	15.9	5	28	55.9	59	57.45	167.5	167.5	167.5	71.2	71.2	71.2	20.4767	118	114	116	116	117	115	71	64	65	67.5	68	64.5	89	86	84	59
364	MK	F	0	LE PALMIER	13	1	KAMPEMBA	1999-03-30	3500	0	0	0	0		2		0	0	2014-03-27	14	15	5	28	51.7	51.6	51.65	162.5	162.5	162.5	71	71	71	19.5598	117	112	107	114.5	112	109.5	58	57	62	57.5	60	59.5	81	77	79	70
365	KK	F	0	LE PALMIER	13	1	KAMPEMBA	1997-01-16	3500	0	0	0	0		2		0	0	2014-03-27	17	17.1	5	28	60.2	60.3	60.25	150.5	150.5	150.5	75	75	75	26.6001	114	103	108	108.5	111	105.5	67	60	62	63.5	64.5	61	82	74	79	66
366	KB	M	1	LE PALMIER	13	1	KAMPEMBA	1997-11-06	3000	0	0	0	0		2		0	0	2014-03-26	16	16.8	5	30	57.5	57.8	57.65	172	172	172	73.2	73.4	73.3	19.4869	131	130	128	130.5	129.5	129	78	76	74	77	76	75	105	96	99	64
367	MM	M	1	LE PALMIER	13	1	KAMPEMBA	1997-01-08	#NULL!	0	0	0	0		2		0	0	2014-03-26	17	17.1	5	30	64.3	64.6	64.45	166	166	166	70.8	71	70.9	23.3887	139	126	125	132.5	132	125.5	76	81	85	78.5	80.5	83	96	100	102	64
369	KL	M	1	LE PALMIER	13	1	ANNEXE	1999-07-12	4300	0	0	0	0		2		0	0	2014-03-26	14	14.9	5	30	61.3	61.5	61.4	176.7	176.7	176.7	70.1	70.3	70.2	19.6651	111	103	109	107	110	106	57	67	57	62	57	62	82	84	78	75
370	TK	M	1	LE PALMIER	13	1	KAMPEMBA	1997-01-20	4800	0	0	0	0		2		0	1	2014-03-26	17	17.1	5	30	74	74.2	74.1	185.4	185.4	185.4	83.1	83.4	83.25	21.5575	132	129	121	130.5	126.5	125	66	67	59	66.5	62.5	63	88	94	85	68
371	TM	F	0	LE PALMIER	13	1	KAMPEMBA	1996-12-15	3700	0	0	0	0		2		0	0	2014-03-26	17	17.8	5	30	48.2	48.2	48.2	154	154	154	65.1	65.2	65.15	20.3238	120	115	116	117.5	118	115.5	79	72	70	75.5	74.5	71	104	89	90	96
372	KI	M	1	LE PALMIER	13	1	KAMPEMBA	1997-09-22	#NULL!	0	0	0	0		2		1	1	2014-03-27	16	16.8	5	28	62.2	62.4	62.3	172	172	172	82	82	82	21.0587	139	130	129	134.5	134	129.5	86	72	80	79	83	76	103	97	98	73
373	MJ	F	0	LE PALMIER	13	1	KAMPEMBA	1999-11-25	#NULL!	0	0	0	0		2		0	1	2014-03-26	14	14.8	5	30	42.9	43	42.95	152.3	152.3	152.3	59.7	59.9	59.8	18.5167	129	125	128	127	128.5	126.5	66	72	71	69	68.5	71.5	89	94	88	91
374	MN	F	0	LE PALMIER	13	1	KAMPEMBA	1998-10-06	#NULL!	0	0	0	0		2		0	1	2014-03-26	15	15.8	5	30	51.1	51.3	51.2	157.3	157.3	157.3	62.3	62.3	62.3	20.6925	120	112	111	116	115.5	111.5	81	86	78	83.5	79.5	82	99	93	94	87
375	MD	M	1	LE PALMIER	13	1	ANNEXE	1997-06-25	#NULL!	0	0	0	0		2		0	0	2014-03-26	16	16.9	5	30	54.1	54.2	54.15	173.6	173.6	173.6	73.1	73.1	73.1	17.968	120	108	121	114	120.5	114.5	73	69	66	71	69.5	67.5	87	85	89	69
376	TM	M	1	LE PALMIER	13	1	ANNEXE	1997-04-12	#NULL!	0	0	0	0		2		0	0	2014-03-26	16	17	5	29	56.4	56.6	56.5	166.2	166.2	166.2	62.1	62.3	62.2	20.4544	109	110	108	109.5	108.5	109	68	67	61	67.5	64.5	64	81	85	80	61
377	NM	F	0	LE PALMIER	13	1	KAMPEMBA	1996-12-09	#NULL!	0	0	0	0		2		0	0	2014-03-26	17	17.8	5	29	46.1	46.3	46.2	155.7	155.7	155.7	62.5	62.5	62.5	19.0574	102	103	106	102.5	104	104.5	69	60	57	64.5	63	58.5	80	75	76	79
378	NM	F	0	LE PALMIER	13	1	ANNEXE	1998-03-15	3500	0	0	0	0		2		0	0	2014-03-26	16	16	5	30	56.7	56.7	56.7	153.4	153.4	153.4	71.5	71.7	71.6	24.0953	120	129	124	124.5	122	126.5	72	76	69	74	70.5	72.5	90	93	87	105
379	NS	M	1	LE PALMIER	13	1	KAMPEMBA	1997-05-20	4800	0	0	0	0		2		0	0	2014-03-26	16	17	5	30	58.1	58.2	58.15	162	162.2	162.1	68.2	68	68.1	22.1301	131	126	124	128.5	127.5	125	71	75	70	73	70.5	72.5	94	94	95	64
380	NM	F	0	LE PALMIER	13	1	RUASHI	1996-12-15	2800	0	0	0	0		2		0	0	2014-03-26	17	17.8	5	27	57.8	57.8	57.8	150.4	150.4	150.4	72.5	72.7	72.6	25.5524	146	134	128	140	137	131	94	91	87	92.5	90.5	89	110	106	104	71
3012	ON	M	1	LA DECOUVERTE	12	1	ANNEXE	2002-10-10	3400	0	0	0	0		2		0	0	2014-12-02	12	12	4	29	55.9	55.9	55.9	160.2	160.2	160.2	64	64	64	21.7814	86	119	115	102.5	100.5	117	58	63	60	60.5	59	61.5	80	88	86	99
3013	NF	M	1	LA DECOUVERTE	10	1	ANNEXE	2000-06-04	2000	0	0	0	0		2		0	0	2014-11-28	14	14.2	5	25	48.9	48.9	48.9	165	165	165	75.3	75.3	75.3	17.9614	110	112	107	111	108.5	109.5	63	74	67	68.5	65	70.5	77	86	83	57
3014	NN	F	0	LA DECOUVERTE	11	1	ANNEXE	1999-11-27	3000	0	0	0	0		2		0	0	2014-11-28	15	15	5	26	54.8	54.8	54.8	160	160	160	65.3	65.3	65.3	21.4062	102	102	106	102	104	104	64	66	56	65	60	61	79	80	73	81
3015	MM	M	1	LA DECOUVERTE	11	1	ANNEXE	2000-04-02	2800	0	0	0	0		2		0	0	2014-11-28	14	14.3	5	26	39.2	39.2	39.2	151	151	151	65.1	65.1	65.1	17.1922	101	98	103	99.5	102	100.5	54	63	60	58.5	57	61.5	70	74	75	55
3016	MM	M	1	LA DECOUVERTE	10	1	ANNEXE	1999-11-01	2300	0	0	0	0		2		0	0	2014-11-28	15	15.1	5	25	44.3	44.3	44.3	157	157	157	65.2	65.2	65.2	17.9723	125	123	105	124	115	114	75	72	71	73.5	73	71.5	98	91	84	73
3017	KN	F	0	LA DECOUVERTE	11	1	ANNEXE	2002-03-03	3200	0	0	0	0		2		0	0	2014-11-28	12	12.3	4	24	31	31	31	141	141	141	62.1	62.1	62.1	15.5928	121	111	106	116	113.5	108.5	71	71	80	71	75.5	75.5	91	87	89	92
3018	MK	F	0	LA DECOUVERTE	11	1	ANNEXE	2001-06-19	#NULL!	0	0	0	0		2		0	0	2014-11-28	13	13.2	4	25	45.6	45.6	45.6	155	155	155	73.1	73.1	73.1	18.9802	112	120	116	116	114	118	71	67	71	69	71	69	92	94	93	98
3019	KK	M	1	LA DECOUVERTE	12	1	ANNEXE	2000-12-17	2800	0	0	0	0		2		0	0	2014-11-28	13	14	5	26	51.7	51.7	51.7	165	165	165	66.2	66.2	66.2	18.9899	118	125	131	121.5	124.5	128	63	65	66	64	64.5	65.5	90	88	87	56
3020	ME	F	0	LA DECOUVERTE	12	1	ANNEXE	2000-01-24	3500	0	0	0	0		2		0	0	2014-11-28	14	14.3	5	27	50	50	50	164	164	164	63.2	63.2	63.2	18.5901	126	117	110	121.5	118	113.5	72	71	64	71.5	68	67.5	93	91	83	81
3021	NK	F	0	LA DECOUVERTE	13	1	ANNEXE	2001-12-28	2900	0	0	0	0		2		0	0	2014-11-27	12	13	4	29	29.6	29.6	29.6	140	140	140	54.3	54.3	54.3	15.102	99	101	87	100	93	94	70	58	63	64	66.5	60.5	81	78	73	93
3022	MB	F	0	LA DECOUVERTE	14	1	ANNEXE	1998-01-25	2500	0	0	0	0		2		0	0	2014-11-27	16	16.3	5	28	50.8	50.8	50.8	165.3	165.3	165.3	72.2	72.2	72.2	18.5917	119	114	113	116.5	116	113.5	84	77	77	80.5	80.5	77	99	89	90	98
3024	KI	M	1	LA DECOUVERTE	14	1	ANNEXE	1997-04-04	3000	0	0	0	0		2		1	0	2014-12-03	17	17.2	5	28	56.7	56.7	56.7	168.5	168.5	168.5	76	76	76	19.9702	125	118	121	121.5	123	119.5	70	75	71	72.5	70.5	73	90	93	90	68
3025	MM	F	0	LA DECOUVERTE	13	1	LUBUMBASHI	1998-07-25	2500	0	0	0	0		2		1	1	2014-11-28	16	16.1	5	24	53.5	53.5	53.5	154	154	154	73.2	73.2	73.2	22.5586	122	126	121	124	121.5	123.5	66	69	75	67.5	70.5	72	88	98	99	64
3026	KM	F	0	LA DECOUVERTE	13	1	ANNEXE	1997-10-25	3600	0	0	0	0		2		0	0	2014-11-27	17	17	5	29	41.3	41.3	41.3	150	150	150	62.3	62.3	62.3	18.3556	100	105	98	102.5	99	101.5	64	60	60	62	62	60	79	75	76	92
3027	TK	F	0	LA DECOUVERTE	12	1	ANNEXE	1999-03-07	3200	0	0	0	0		2		0	0	2014-11-27	15	15.3	5	29	48.3	48.3	48.3	162	162	162	70.1	70.1	70.1	18.4042	111	111	117	111	114	114	68	72	79	70	73.5	75.5	90	93	93	93
3028	OM	F	0	LA DECOUVERTE	13	1	ANNEXE	1999-10-22	3000	0	0	0	0		2		0	0	2014-11-27	15	15	5	29	55.6	55.6	55.6	155	155	155	72.3	72.3	72.3	23.1426	124	116	111	120	117.5	113.5	70	54	67	62	68.5	60.5	89	77	88	92
3029	KK	F	0	LA DECOUVERTE	14	1	KATUBA	1998-03-08	3200	0	0	0	0		2		1	0	2014-12-03	16	16.3	5	28	68.5	68.5	68.5	169.2	169.2	169.2	90.5	90.5	90.5	23.9271	109	105	100	107	104.5	102.5	72	72	69	72	70.5	70.5	87	86	80	77
3030	IK	M	1	LA DECOUVERTE	14	1	ANNEXE	1997-12-11	4000	0	0	0	0		2		0	0	2014-12-03	16	17	5	28	46.7	46.7	46.7	165.2	165.2	165.2	65	65	65	17.1118	123	115	109	119	116	112	71	75	74	73	72.5	74.5	97	90	85	78
3031	KM	M	1	LA DECOUVERTE	13	1	ANNEXE	1998-07-15	3000	0	0	0	0		2		0	0	2014-12-02	16	16.1	5	27	61.52	61.52	61.52	176.1	176.1	176.1	78.5	78.5	78.5	19.838	117	127	109	122	113	118	48	49	67	48.5	57.5	58	62	77	68	59
3032	KS	M	1	LA DECOUVERTE	11	1	ANNEXE	2000-06-10	2800	0	0	0	0		2		0	0	2014-11-27	14	14.2	5	28	39.5	39.5	39.5	149	149	149	63.1	63.1	63.1	17.792	102	98	100	100	101	99	64	63	66	63.5	65	64.5	80	78	80	79
3033	BN	M	1	LA DECOUVERTE	11	1	ANNEXE	2000-05-28	3200	0	0	0	0		2		0	0	2014-11-27	14	14.2	5	28	45.5	45.5	45.5	143	143	143	64.4	64.4	64.4	22.2505	128	119	114	123.5	121	116.5	70	67	63	68.5	66.5	65	94	83	82	78
3034	KE	F	0	LA DECOUVERTE	10	1	ANNEXE	2001-02-05	2900	0	0	0	0		2		1	1	2014-11-27	14	13.3	4	28	49.1	49.1	49.1	152	152	152	71.2	71.2	71.2	21.2517	127	128	123	127.5	125	125.5	90	72	77	81	83.5	74.5	106	91	112	80
3035	MK	M	1	LA DECOUVERTE	11	1	ANNEXE	1999-06-25	4000	0	0	0	0		2		0	0	2014-11-27	15	15.2	5	28	66.6	66.6	66.6	169	169	169	73.4	73.4	73.4	23.3185	139	119	126	129	132.5	122.5	69	65	67	67	68	66	96	85	86	74
3036	YM	F	0	LA DECOUVERTE	12	1	KATUBA	1999-06-06	3000	0	0	0	0		2		1	0	2014-11-27	15	15.2	5	28	58.5	58.5	58.5	156	156	156	75.5	75.5	75.5	24.0385	128	130	123	129	125.5	126.5	77	71	73	74	75	72	97	90	93	79
3037	KL	M	1	LA DECOUVERTE	12	1	LUBUMBASHI	2001-04-24	3050	0	0	0	0		2		0	0	2014-11-27	13	13.2	4	28	37.9	37.9	37.9	149	149	149	63.2	63.2	63.2	17.0713	114	116	115	115	114.5	115.5	64	64	72	64	68	68	90	88	85	80
3038	KK	F	0	LA DECOUVERTE	11	1	ANNEXE	2001-04-18	3800	0	0	0	0		2		0	0	2014-11-27	13	13.2	4	28	54.4	54.4	54.4	166	166	166	64.3	64.3	64.3	19.7416	105	127	108	116	106.5	117.5	69	53	60	61	64.5	56.5	80	78	80	73
3039	NK	F	0	LA DECOUVERTE	12	1	ANNEXE	1998-11-23	2800	0	0	0	0		2		0	0	2014-11-27	16	16	5	28	54.4	54.4	54.4	163	163	163	71.3	71.3	71.3	20.475	120	115	117	117.5	118.5	116	71	76	77	73.5	74	76.5	97	92	98	63
3040	MM	F	0	LA DECOUVERTE	14	1	ANNEXE	1999-12-23	3900	0	0	0	0		2		0	0	2014-12-03	14	14.9	5	28	56	56	56	153	153	153	75.2	75.2	75.2	23.9224	120	111	103	115.5	111.5	107	76	80	63	78	69.5	71.5	93	90	87	103
3042	KM	M	1	LA DECOUVERTE	13	1	ANNEXE	1998-11-01	3400	0	0	0	0		2		0	0	2014-11-27	16	16.1	5	28	61.8	61.8	61.8	159	159	159	72.3	72.3	72.3	24.4452	132	125	119	128.5	125.5	122	76	78	70	77	73	74	93	93	89	71
3043	KB	M	1	LA DECOUVERTE	15	1	ANNEXE	1999-10-31	#NULL!	0	0	0	0		2		0	0	2014-11-26	15	15	5	30	53.8	53.8	53.8	160	160	160	69.1	69.1	69.1	21.0156	129	127	129	128	129	128	85	70	77	77.5	81	73.5	100	90	100	69
3044	KT	F	0	LA DECOUVERTE	11	1	ANNEXE	1999-05-04	3400	0	0	0	0		2		0	0	2014-11-28	15	15.2	5	26	61.4	61.4	61.4	158	158	158	73.1	73.1	73.1	24.5954	130	122	115	126	122.5	118.5	67	66	69	66.5	68	67.5	90	86	84	75
1811	MM	F	0	BAHAI ANIS	12	1	KAMPEMBA	2000-03-20	3600	0	0	0	0		2		0	0	2014-10-11	14	14.2	5	35	57.3	57.3	57.3	173.3	173.3	173.3	73	73	73	19.0791	124	129	125	126.5	124.5	127	68	67	60	67.5	64	63.5	94	94	89	73
1812	MM	M	1	BAHAI ANIS	12	1	KAMPEMBA	1999-07-29	3500	0	0	0	0		2		0	0	2014-10-11	15	15	5	34	62.1	62.1	62.1	170.1	170.1	170.1	74.5	74.5	74.5	21.4626	107	120	119	113.5	113	119.5	68	60	53	64	60.5	56.5	85	81	79	56
1813	EM	F	0	BAHAI ANIS	12	1	KAMPEMBA	1997-10-15	2200	0	0	0	0		2		0	0	2014-10-11	16	17	5	34	45.1	45.1	45.1	154	154	154	60.2	60.2	60.2	19.0167	133	131	134	132	133.5	132.5	69	57	56	63	62.5	56.5	94	87	80	86
1814	KT	M	1	BAHAI ANIS	12	1	KAMPEMBA	1997-11-11	3200	0	0	0	0		2		0	0	2014-10-11	16	17	5	34	47.6	47.6	47.6	166.3	166.3	166.3	64	64	64	17.2116	125	124	122	124.5	123.5	123	66	76	65	71	65.5	70.5	88	98	88	68
1815	NS	M	1	BAHAI ANIS	12	1	KAMPEMBA	2001-02-28	2960	0	0	0	0		2		0	0	2014-10-11	13	13.2	4	34	42.7	42.7	42.7	154.2	154.2	154.2	60.5	60.5	60.5	17.958	107	103	104	105	105.5	103.5	68	59	59	63.5	63.5	59	81	75	73	83
1816	NB	F	0	BAHAI ANIS	12	1	KAMPEMBA	1997-05-17	3500	0	0	0	0		2		0	0	2014-10-11	17	17.1	5	34	53.9	53.9	53.9	163.1	163.1	163.1	70.5	70.5	70.5	20.2619	112	110	120	111	116	115	62	63	73	62.5	67.5	68	78	85	92	88
1817	NT	M	1	BAHAI ANIS	12	1	KAMPEMBA	1997-06-26	3000	0	0	0	0		2		0	0	2014-10-11	17	17.1	5	34	55	55	55	168.3	168.3	168.3	67	67	67	19.4176	114	114	115	114	114.5	114.5	67	69	59	68	63	64	86	86	80	73
1819	MK	F	0	BAHAI ANIS	12	1	KAMPEMBA	1998-06-12	2800	0	0	0	0		2		0	0	2014-10-14	16	16.1	5	34	46.9	46.9	46.9	158	158	158	67.3	67.3	67.3	18.7871	119	113	119	116	119	116	71	70	65	70.5	68	67.5	90	83	82	78
1820	MM	F	0	BAHAI ANIS	15	1	KAMPEMBA	1997-06-20	2500	0	0	0	0		2		0	1	2014-10-14	17	17.1	5	32	54.4	54.4	54.4	158.2	158.2	158.2	73.3	73.3	73.3	21.7363	108	104	103	106	105.5	103.5	60	70	55	65	57.5	62.5	79	81	72	70
381	MM	F	0	LE PALMIER	11	1	KAMPEMBA	1999-05-10	#NULL!	0	0	0	0		2		0	0	2014-03-19	14	15	5	27	45.5	45.5	45.5	150.3	150.3	150.3	63	63	63	20.1416	121	117	120	119	120.5	118.5	59	69	65	64	62	67	85	89	85	58
382	KK	M	1	LE PALMIER	14	1	KAMPEMBA	1997-05-25	#NULL!	0	0	0	0		2		0	0	2014-03-22	16	16.9	5	26	62.5	62.56	62.53	168.9	169	168.95	70	70	70	21.9065	122	114	112	118	117	113	77	72	71	74.5	74	71.5	93	89	94	65
383	TB	F	0	LE PALMIER	14	1	KAMPEMBA	1997-07-18	3200	0	0	0	0		2		0	0	2014-03-21	16	16.9	5	27	47.9	47.9	47.9	160.5	160.6	160.55	64	64	64	18.583	134	124	126	129	130	125	82	84	84	83	83	84	102	102	102	93
384	MK	M	1	LE PALMIER	14	1	KAMPEMBA	1996-10-15	3500	0	0	0	0		2		0	0	2014-03-22	17	17.8	5	27	52.4	52.4	52.4	166.9	166.9	166.9	64	64	64	18.8113	129	119	123	124	126	121	80	72	73	76	76.5	72.5	96	93	90	73
385	LL	F	0	LE PALMIER	14	1	KAMPEMBA	1997-10-21	3500	0	0	0	0		2		0	0	2014-03-22	16	16.8	5	27	54.5	54.6	54.55	153.1	153.2	153.15	64	64	64	23.2574	116	121	103	118.5	109.5	112	58	64	55	61	56.5	59.5	78	84	74	66
386	MM	M	1	LE PALMIER	14	1	KAMPEMBA	1997-11-22	3000	0	0	0	0		2		0	0	2014-03-22	16	16.8	5	26	61.7	61.7	61.7	169.8	169.8	169.8	67	67	67	21.3998	128	122	117	125	122.5	119.5	83	69	65	76	74	67	99	90	91	65
387	KK	F	0	LE PALMIER	14	1	KAMPEMBA	1996-12-12	3500	0	0	0	0		2		1	0	2014-03-22	17	17.8	5	26	57.3	58.1	57.7	168.9	169	168.95	66	66	66	20.2143	119	113	108	116	113.5	110.5	73	70	85	71.5	79	77.5	94	96	96	66
388	MI	F	0	LE PALMIER	14	1	KAMPEMBA	1997-01-18	#NULL!	0	0	0	0		2		0	0	2014-03-24	17	17.1	5	27	60.3	60.3	60.3	164	164	164	76.6	76.6	76.6	22.4197	120	126	119	123	119.5	122.5	81	75	76	78	78.5	75.5	95	92	91	75
389	KN	F	0	LE PALMIER	14	1	KAMPEMBA	1997-03-24	#NULL!	0	0	0	0		2		0	1	2014-03-22	16	17	5	27	56	56.1	56.05	162.3	162.3	162.3	66	66	66	21.2784	111	103	101	107	106	102	82	67	73	74.5	77.5	70	97	88	87	78
390	KK	M	1	LE PALMIER	14	1	KAMPEMBA	1997-05-26	4000	0	0	0	0		2		0	0	2014-03-24	16	16.9	5	29	66.5	66.5	66.5	171.4	171.4	171.4	72.5	72.5	72.5	22.636	130	121	117	125.5	123.5	119	76	57	60	66.5	68	58.5	94	85	82	83
391	MN	M	1	LE PALMIER	14	1	ANNEXE	1996-10-15	#NULL!	0	0	0	0		2		0	1	2014-03-24	17	17.8	5	27	58.9	58.9	58.9	165.9	165.9	165.9	72	72	72	21.4004	112	112	105	112	108.5	108.5	71	69	61	70	66	65	89	84	90	69
392	LM	M	1	LE PALMIER	14	1	KAMPEMBA	1997-12-26	3500	0	0	0	0		2		0	1	2014-03-24	16	16.7	5	27	52.8	52.8	52.8	154.8	154.8	154.8	66.2	66.3	66.25	22.0339	171	169	170	170	170.5	169.5	110	97	97	103.5	103.5	97	136	126	127	91
393	TC	F	0	LE PALMIER	14	1	KAMPEMBA	1997-07-02	3500	0	0	0	0		2		0	1	2014-03-25	16	16.9	5	27	42.7	42.6	42.65	148.7	148.6	148.65	58.9	58.9	58.9	19.3014	113	106	108	109.5	110.5	107	70	72	76	71	73	74	88	94	89	68
394	MY	F	0	LE PALMIER	15	1	KAMPEMBA	1996-10-28	#NULL!	0	0	0	0		2		0	0	2014-03-25	17	17.8	5	27	54.6	54.7	54.65	153.7	153.7	153.7	68.6	68.6	68.6	23.1336	112	115	115	113.5	113.5	115	69	69	74	69	71.5	71.5	89	82	84	74
395	BM	F	0	LE PALMIER	15	1	KAMPEMBA	1996-12-15	2500	0	0	0	0		2		0	0	2014-03-25	17	17.8	5	27	55.3	55.3	55.3	150.9	150.9	150.9	70.7	70.7	70.7	24.2855	126	120	119	123	122.5	119.5	68	67	75	67.5	71.5	71	93	85	88	70
396	ML	F	0	LE PALMIER	15	1	KAMPEMBA	1996-10-12	3800	0	0	0	0		2		0	0	2014-03-22	17	17.8	5	27	47.1	47.2	47.15	154.8	154.8	154.8	58	58	58	19.6761	138	122	126	130	132	124	68	64	57	66	62.5	60.5	98	95	83	96
397	LN	M	1	LA REFERENCE	3	1	KAMPEMBA	2009-05-17	2850	0	0	0	0		2		0	0	2014-04-28	4	5	2	24	17.2	17.1	17.15	105.5	105.7	105.6	52.5	52.3	52.4	15.3793	98	93	100	95.5	99	96.5	70	61	62	65.5	66	61.5	80	76	78	99
398	AN	M	1	LA REFERENCE	2	1	KAMPEMBA	2010-04-05	3100	0	0	0	0		2		0	0	2014-04-28	4	4.1	2	24	16	16.1	16.05	96.7	96.5	96.6	51.7	51.6	51.65	17.1997	107	90	95	98.5	101	92.5	42	65	61	53.5	51.5	63	58	75	74	114
399	TE	M	1	LA REFERENCE	2	1	KAMPEMBA	2010-08-03	3150	0	0	0	0		2		1	0	2014-04-28	3	3.9	2	25	15.5	15.6	15.55	96.5	96.3	96.4	50.2	50.3	50.25	16.7331	97	100	93	98.5	95	96.5	63	48	61	55.5	62	54.5	73	67	77	105
400	MK	M	1	LA REFERENCE	3	1	KAMPEMBA	2009-03-13	3070	0	0	0	0		2		0	0	2014-04-28	5	5.1	2	25	19.5	19.5	19.5	107.5	107.7	107.6	56.4	56.2	56.3	16.8426	95	99	96	97	95.5	97.5	65	50	65	57.5	65	57.5	78	70	76	98
401	TM	F	0	LA REFERENCE	3	1	KAMPEMBA	2009-06-23	3050	0	0	0	0		2		0	0	2014-04-28	4	5	2	26	15.2	15.2	15.2	95.3	95.5	95.4	49.8	49.6	49.7	16.7012	119	106	90	112.5	104.5	98	65	72	57	68.5	61	64.5	86	84	70	112
402	MT	F	0	LA REFERENCE	2	1	KAMPEMBA	2010-11-30	3000	0	0	0	0		2		0	0	2014-04-28	3	3.8	2	28	18	18	18	102	102.4	102.2	52.6	52.4	52.5	17.2334	114	111	111	112.5	112.5	111	60	63	64	61.5	62	63.5	80	77	77	133
403	BN	F	0	LA REFERENCE	2	1	KAMPEMBA	2010-09-15	3200	0	0	0	0		2		0	0	2014-04-28	3	3.9	2	28	15.5	16	15.75	88.4	88.5	88.45	49.3	49.2	49.25	20.1319	110	130	107	120	108.5	118.5	73	68	59	70.5	66	63.5	80	81	77	115
404	MM	F	0	LA REFERENCE	2	1	KAMPEMBA	2010-11-23	2700	0	0	0	0		2		0	0	2014-04-28	3	3.8	2	28	14.3	14.3	14.3	92.3	92.2	92.25	50.3	50.1	50.2	16.8036	109	115	102	112	105.5	108.5	64	67	75	65.5	69.5	71	81	74	83	138
405	MM	F	0	LA REFERENCE	3	1	KAMPEMBA	2009-02-07	2850	0	0	0	0		2		0	1	2014-04-28	5	5.1	2	26	14.8	14.8	14.8	95.5	95.6	95.55	52.3	52.1	52.2	16.2106	91	102	88	96.5	89.5	95	66	57	48	61.5	57	52.5	76	71	71	101
406	KK	F	0	LA REFERENCE	2	1	KAMPEMBA	2010-12-02	3400	0	0	0	0		2		0	0	2014-04-28	3	3.8	2	26	16.2	16.2	16.2	105.6	105.8	105.7	47.3	47.4	47.35	14.4999	129	120	113	124.5	121	116.5	72	75	70	73.5	71	72.5	90	89	86	137
407	MZ	F	0	LA REFERENCE	3	1	KAMPEMBA	2009-06-06	2900	0	0	0	0		2		0	0	2014-04-28	4	5	2	26	14.3	14.2	14.25	97.5	97.3	97.4	47.5	47.3	47.4	15.0209	103	101	99	102	101	100	57	56	57	56.5	57	56.5	74	75	71	127
408	MK	F	0	LA REFERENCE	1	1	KAMPEMBA	2011-07-02	2400	0	0	0	0		2		1	0	2014-04-24	2	3	2	28	15.8	15.8	15.8	101.3	101.1	101.2	39.4	39.2	39.3	15.4275	88	85	90	86.5	89	87.5	63	67	66	65	64.5	66.5	74	73	70	95
409	MA	F	0	LA REFERENCE	2	1	KAMPEMBA	2010-06-05	2550	0	0	0	0		2		0	0	2014-04-24	3	4	2	29	16.1	16.1	16.1	102.5	102.3	102.4	51.6	51.4	51.5	15.3542	112	104	115	108	113.5	109.5	63	71	61	67	62	66	82	80	80	136
410	NE	M	1	LA REFERENCE	3	1	KAMPEMBA	2009-03-16	2700	0	0	0	0		2		0	0	2014-04-24	5	5.1	2	28	17.1	17.2	17.15	107.9	107.7	107.8	50.2	50.4	50.3	14.758	90	85	88	87.5	89	86.5	51	58	56	54.5	53.5	57	72	64	61	92
411	MN	F	0	LA REFERENCE	2	1	KAMPEMBA	2010-11-11	2850	0	0	0	0		2		0	0	2014-04-24	3	3.8	2	27	15.7	15.7	15.7	99.2	99.3	99.25	49.9	49.5	49.7	15.9382	99	88	96	93.5	97.5	92	61	55	60	58	60.5	57.5	76	66	70	92
412	MM	M	1	LA REFERENCE	2	1	KAMPEMBA	2010-12-10	3100	0	0	0	0		2		0	0	2014-04-24	3	3.8	2	28	19.3	19.2	19.25	106.2	106.1	106.15	52.3	52.5	52.4	17.084	101	80	88	90.5	94.5	84	59	48	56	53.5	57.5	52	75	67	70	99
413	BN	M	1	LA REFERENCE	3	1	KAMPEMBA	2009-03-03	3100	0	0	0	0		2		1	0	2014-04-24	5	5.1	2	27	20.3	20.25	20.275	109.9	109.8	109.85	58.1	58.1	58.1	16.802	111	107	107	109	109	107	52	59	65	55.5	58.5	62	83	74	74	102
414	KT	M	1	LA REFERENCE	3	1	KAMPEMBA	2009-03-29	2500	0	0	0	0		2		0	1	2014-04-24	5	5	2	27	16.7	16.7	16.7	105.3	105.5	105.4	49.6	49.6	49.6	15.0326	93	88	91	90.5	92	89.5	45	60	58	52.5	51.5	59	69	70	71	92
415	LT	M	1	LA REFERENCE	2	1	KAMPEMBA	2010-10-15	2650	0	0	0	0		2		0	0	2014-04-24	3	3.8	2	27	15	15	15	92.3	92.2	92.25	54.5	54.2	54.35	17.6262	96	94	94	95	95	94	65	59	58	62	61.5	58.5	77	72	75	98
416	MT	F	0	LA REFERENCE	3	1	KAMPEMBA	2009-04-10	2900	0	0	0	0		2		0	0	2014-04-24	5	5	2	27	17.1	17	17.05	104.5	104.2	104.35	51.5	51.6	51.55	15.6581	92	87	92	89.5	92	89.5	58	60	56	59	57	58	70	74	73	90
417	NK	M	1	LA REFERENCE	1	1	KAMPEMBA	2011-02-11	2750	0	0	0	0		2		0	0	2014-04-24	3	3.1	2	28	16.8	16.8	16.8	102.2	102	102.1	51.2	51.2	51.2	16.116	102	87	98	94.5	100	92.5	49	56	52	52.5	50.5	54	61	64	66	106
418	KT	F	0	LA REFERENCE	3	1	KAMPEMBA	2009-08-10	2800	0	0	0	0		2		0	0	2014-04-24	4	4.9	2	28	18	18	18	113.2	113.2	113.2	53.2	53.4	53.3	14.0469	91	90	87	90.5	89	88.5	63	61	54	62	58.5	57.5	74	73	69	103
420	LT	M	1	LA REFERENCE	2	1	KAMPEMBA	2010-03-29	3100	0	0	0	0		2		0	0	2014-04-24	4	4	2	27	19.3	19.3	19.3	108.3	108.1	108.2	52.8	52.9	52.85	16.4855	93	104	100	98.5	96.5	102	56	54	58	55	57	56	73	73	75	94
421	MK	M	1	LA REFERENCE	1	1	KAMPEMBA	2011-03-01	3200	0	0	0	0		2		0	1	2014-04-24	3	3.1	2	28	16.3	16.3	16.3	100.2	100.4	100.3	52.6	52.4	52.5	16.2026	93	100	98	96.5	95.5	99	70	68	62	69	66	65	77	79	82	95
423	MO	M	1	LA REFERENCE	3	1	KAMPEMBA	2009-05-10	2850	0	0	0	0		2		0	1	2014-04-24	4	5	2	28	17.2	17.3	17.25	107.3	107.1	107.2	50.5	50.4	50.45	15.0107	107	100	106	103.5	106.5	103	68	64	66	66	67	65	90	88	88	104
424	KM	M	1	LA REFERENCE	3	1	KAMPEMBA	2008-06-20	2950	0	0	0	0		2		0	1	2014-04-29	5	6	2	23	18.6	18.6	18.6	110.4	110.3	110.35	52	52.5	52.25	15.2745	94	92	94	93	94	93	59	64	62	61.5	60.5	63	71	74	76	99
425	NK	M	1	LA REFERENCE	2	1	KAMPEMBA	2010-06-13	3000	0	0	0	0		2		0	0	2014-04-29	3	4	2	26	16.9	16.8	16.85	110.5	110.3	110.4	49.8	49.7	49.75	13.8249	108	108	108	108	108	108	62	73	60	67.5	61	66.5	82	86	81	140
426	MK	M	1	LA REFERENCE	2	1	KAMPEMBA	2009-09-12	3000	0	0	0	0		2		0	0	2014-04-29	4	4.9	2	26	14.8	14.7	14.75	96.8	96.6	96.7	49.8	49.6	49.7	15.7739	90	88	89	89	89.5	88.5	55	53	60	54	57.5	56.5	73	66	73	99
427	KS	F	0	LA REFERENCE	2	1	KAMPEMBA	2009-10-30	3300	0	0	0	0		2		0	0	2014-04-29	4	4.8	2	26	15.4	15.3	15.35	97.5	97.4	97.45	50.6	50.5	50.55	16.1638	84	89	84	86.5	84	86.5	59	59	53	59	56	56	69	77	72	108
428	KM	F	0	LA REFERENCE	2	1	KAMPEMBA	2009-12-27	2250	0	0	0	0		2		0	0	2014-04-29	4	4.8	2	26	17	17	17	97.6	97.8	97.7	50.8	50.5	50.65	17.8098	93	105	108	99	100.5	106.5	68	69	71	68.5	69.5	70	77	85	82	112
429	EU	M	1	LA REFERENCE	2	1	KAMPEMBA	2009-11-17	3400	0	0	0	0		2		0	0	2014-04-29	4	4.8	2	24	17.9	17.9	17.9	101.4	101.3	101.35	55.8	55.9	55.85	17.4263	124	130	122	127	123	126	72	65	67	68.5	69.5	66	89	90	89	107
430	BI	M	1	LA REFERENCE	2	1	KAMPEMBA	2009-08-03	3100	0	0	0	0		2		0	0	2014-04-29	4	5	2	23	16.8	16.8	16.8	102.5	102.3	102.4	48.2	48.1	48.15	16.0217	89	84	94	86.5	91.5	89	61	38	48	49.5	54.5	43	70	72	87	110
431	TK	F	0	LA REFERENCE	2	1	KAMPEMBA	2009-02-14	3050	0	0	0	0		2		0	0	2014-04-29	5	5.1	2	24	16.6	16.7	16.65	102.9	102.8	102.85	50.2	50.3	50.25	15.74	89	88	86	88.5	87.5	87	64	54	57	59	60.5	55.5	71	72	72	89
432	MM	M	1	LA REFERENCE	1	1	KAMPEMBA	2010-09-05	3210	0	0	0	0		2		0	0	2014-04-29	3	3.9	2	24	14.5	14.5	14.5	94.4	94.2	94.3	48.8	48.7	48.75	16.3059	134	113	112	123.5	123	112.5	82	58	50	70	66	54	100	80	77	133
433	MK	M	1	LA REFERENCE	1	1	KAMPEMBA	2011-05-17	3200	0	0	0	0		2		0	0	2014-04-29	2	3	2	26	14.3	14.3	14.3	88.8	88.5	88.65	48.5	48.7	48.6	18.1961	110	100	98	105	104	99	57	71	68	64	62.5	69.5	80	82	87	106
434	YM	M	1	PAX	5	1	KAMPEMBA	2007-04-13	3050	0	0	0	0		2		0	0	2014-04-24	7	7	3	28	17.2	17.2	17.2	112.2	112.3	112.25	52.2	52.2	52.2	13.6507	91	96	100	93.5	95.5	98	47	58	63	52.5	55	60.5	69	78	64	101
435	MM	F	0	PAX	5	1	KAMPEMBA	2008-01-09	2900	0	0	0	0		2		0	0	2014-04-24	6	6.1	2	28	21.5	21.5	21.5	118.5	118.7	118.6	52.3	52.2	52.25	15.2851	111	108	101	109.5	106	104.5	61	64	62	62.5	61.5	63	80	77	73	110
436	LN	F	0	PAX	5	1	KAMPEMBA	2007-05-04	2750	0	0	0	0		2		0	0	2014-04-24	6	7	3	28	21	21	21	122.6	122.7	122.65	51.8	51.5	51.65	13.96	105	98	97	101.5	101	97.5	60	59	68	59.5	64	63.5	79	70	79	105
437	NN	F	0	PAX	5	1	KAMPEMBA	2007-08-28	2900	0	0	0	0		2		0	0	2014-04-24	6	6.9	2	28	23.3	23.4	23.35	128.4	128.2	128.3	52.4	52.2	52.3	14.1851	100	99	96	99.5	98	97.5	72	68	59	70	65.5	63.5	76	71	69	94
438	IK	F	0	PAX	5	1	KAMPEMBA	2007-08-04	3600	0	0	0	0		2		0	0	2014-04-24	6	6.9	2	28	17.7	17.7	17.7	115.4	115.2	115.3	50.3	50.1	50.2	13.3142	100	93	94	96.5	97	93.5	68	59	51	63.5	59.5	55	79	70	68	96
439	NM	M	1	PAX	5	1	KAMPEMBA	2005-01-20	3300	0	0	0	0		2		0	0	2014-04-24	9	9.1	3	28	26.2	26.3	26.25	125.4	125.4	125.4	58.6	58.4	58.5	16.693	100	98	94	99	97	96	66	62	60	64	63	61	64	66	58	97
440	MM	M	1	PAX	5	1	KAMPEMBA	2007-09-06	2800	0	0	0	0		2		0	0	2014-04-24	6	6.9	2	28	24.1	24	24.05	123.6	123.5	123.55	53.6	53.4	53.5	15.7554	99	104	100	101.5	99.5	102	52	60	66	56	59	63	71	77	78	81
441	MN	M	1	PAX	6	1	KAMPEMBA	2006-06-20	3600	0	0	0	0		2		0	0	2014-04-24	7	8	3	29	27.7	27.7	27.7	136.4	136.5	136.45	53.7	53.6	53.65	14.8776	101	98	100	99.5	100.5	99	58	60	62	59	60	61	77	75	78	112
442	KM	M	1	PAX	6	1	KAMPEMBA	2006-03-13	3420	0	0	0	0		2		0	0	2014-04-24	8	8.1	3	29	24.2	24.2	24.2	128.6	128.4	128.5	52.6	52.4	52.5	14.6558	112	101	108	106.5	110	104.5	69	70	71	69.5	70	70.5	86	86	83	96
443	BK	M	1	PAX	7	1	KAMPEMBA	2003-02-15	3730	0	0	0	0		2		0	0	2014-04-24	11	11.1	4	29	26	26.1	26.05	135.9	135.8	135.85	56.6	56.5	56.55	14.1152	105	94	90	99.5	97.5	92	70	67	64	68.5	67	65.5	85	78	79	103
444	KA	F	0	PAX	6	1	KAMPEMBA	2006-10-23	3500	0	0	0	0		2		0	0	2014-04-24	7	7.8	3	30	24.5	24.6	24.55	123.7	123.7	123.7	53.6	53.5	53.55	16.044	102	97	108	99.5	105	102.5	69	63	53	66	61	58	80	77	78	96
445	MK	M	1	PAX	6	1	KAMPEMBA	2005-10-08	3820	0	0	0	0		2		0	0	2014-04-24	8	8.9	3	30	31.4	31.5	31.45	126.8	126.9	126.85	60.6	60.4	60.5	19.5452	113	105	93	109	103	99	72	69	69	70.5	70.5	69	85	83	78	90
446	MK	F	0	PAX	7	1	KAMPEMBA	2005-11-02	3510	0	0	0	0		2		0	0	2014-04-24	8	8.9	3	30	30.9	30.9	30.9	137.4	137.5	137.45	58.5	58.3	58.4	16.3557	118	112	111	115	114.5	111.5	64	64	65	64	64.5	64.5	86	87	82	98
447	MD	M	1	PAX	7	1	KAMPEMBA	2004-11-22	3310	0	0	0	0		2		0	0	2014-04-24	9	9.8	3	30	23.9	23.9	23.9	124.4	124.4	124.4	51.8	51.5	51.65	15.4439	91	91	89	91	90	90	51	60	55	55.5	53	57.5	70	74	70	74
448	MK	M	1	PAX	7	1	KAMPEMBA	2002-09-22	3300	0	0	0	0		2		0	0	2014-04-24	11	11.9	4	30	33.1	33.2	33.15	129.8	129.6	129.7	64.5	64.3	64.4	19.7062	93	95	91	94	92	93	50	65	59	57.5	54.5	62	70	76	70	58
449	MS	F	0	PAX	7	1	KAMPEMBA	2006-05-19	3220	0	0	0	0		2		0	0	2014-04-24	7	8	3	30	23.9	23.9	23.9	124.6	124.3	124.45	54.3	54.4	54.35	15.4315	118	119	116	118.5	117	117.5	75	70	63	72.5	69	66.5	90	100	86	106
450	NW	F	0	PAX	6	1	KAMPEMBA	2006-09-15	3250	0	0	0	0		2		0	0	2014-04-24	7	7.9	3	30	26.2	26.2	26.2	127.5	127.5	127.5	55.4	55.3	55.35	16.1169	91	88	87	89.5	89	87.5	59	61	54	60	56.5	57.5	70	69	70	99
451	KP	F	0	PAX	6	1	KAMPEMBA	2006-02-23	3300	0	0	0	0		2		0	0	2014-04-24	8	8.1	3	30	26.7	26.8	26.75	129.3	129.1	129.2	55.6	55.4	55.5	16.025	92	94	89	93	90.5	91.5	59	51	56	55	57.5	53.5	73	68	72	95
452	BS	F	0	PAX	6	1	KAMPEMBA	2004-07-12	3200	0	0	0	0		2		0	1	2014-04-24	9	9.9	3	30	28	28	28	129.6	129.5	129.55	57.6	57.5	57.55	16.6833	106	102	95	104	100.5	98.5	60	57	61	58.5	60.5	59	79	75	75	87
453	WA	M	1	PAX	6	1	KAMPEMBA	2004-04-02	3100	0	0	0	0		2		1	0	2014-04-24	10	10.1	3	30	27.4	27.4	27.4	127.4	127.3	127.35	61.3	61.1	61.2	16.8948	89	79	84	84	86.5	81.5	57	52	58	54.5	57.5	55	70	66	69	90
454	NW	M	1	PAX	7	1	KAMPEMBA	2004-12-07	3610	0	0	0	0		2		0	0	2014-04-24	9	9.8	3	30	33	33.1	33.05	136.8	136.7	136.75	60.6	60.5	60.55	17.6733	100	99	95	99.5	97.5	97	63	56	58	59.5	60.5	57	77	75	75	84
455	MA	F	0	PAX	7	1	KAMPEMBA	2006-12-30	3400	0	0	0	0		2		0	0	2014-04-24	7	7.7	3	30	25.4	25.4	25.4	127.2	127.3	127.25	55.6	55.5	55.55	15.6862	99	91	81	95	90	86	53	55	63	54	58	59	67	66	70	90
456	MM	M	1	PAX	6	1	KAMPEMBA	2004-03-27	3350	0	0	0	0		2		0	0	2014-04-24	10	10	3	30	32.2	32.2	32.2	140.2	140.3	140.25	60.3	60.1	60.2	16.3701	94	92	90	93	92	91	49	62	58	55.5	53.5	60	69	73	70	84
457	BN	M	1	PAX	7	1	KAMPEMBA	2006-06-10	3050	0	0	0	0		2		0	0	2014-04-24	7	8	3	30	23.9	23.9	23.9	123.7	123.9	123.8	55.8	55.9	55.85	15.594	99	93	111	96	105	102	58	63	57	60.5	57.5	60	72	77	77	109
458	IL	M	1	PAX	7	1	KAMPEMBA	2003-11-11	2950	0	0	0	0		2		1	0	2014-04-24	10	10.8	3	30	30.4	30.4	30.4	138.2	138.1	138.15	59.7	59.5	59.6	15.9284	118	116	108	117	113	112	69	66	64	67.5	66.5	65	89	82	86	96
459	DK	F	0	PAX	8	1	KAMPEMBA	2004-04-24	3850	0	0	0	0		2		0	0	2014-04-24	10	10	3	30	29.4	29.4	29.4	138.5	138.3	138.4	54.5	54.3	54.4	15.3488	93	93	101	93	97	97	61	64	70	62.5	65.5	67	78	76	72	86
460	IS	F	0	PAX	7	1	KAMPEMBA	2006-10-20	3200	0	0	0	0		2		0	0	2014-04-24	7	7.8	3	30	26.1	26.1	26.1	124.6	124.4	124.5	54.4	54.3	54.35	16.8384	93	90	96	91.5	94.5	93	60	60	62	60	61	61	75	72	75	92
461	LM	M	1	PAX	7	1	KAMPEMBA	2003-08-24	3350	0	0	0	0		2		0	0	2014-04-24	10	10.9	3	30	33.5	33.5	33.5	142.6	142.8	142.7	57.2	57.2	57.2	16.4512	104	99	101	101.5	102.5	100	61	52	60	56.5	60.5	56	76	77	81	95
462	LM	M	1	PAX	8	1	KAMPEMBA	2004-05-05	3100	0	0	0	0		2		0	0	2014-04-24	9	10	3	30	38.8	38.9	38.85	149.3	149.2	149.25	64.9	64.9	64.9	17.4406	113	102	96	107.5	104.5	99	81	67	62	74	71.5	64.5	85	85	75	100
463	MN	M	1	PAX	5	1	KAMPEMBA	2007-09-09	3000	0	0	0	0		2		0	0	2014-04-28	6	6.9	2	24	23.2	23.1	23.15	122.3	122.4	122.35	54.8	54.7	54.75	15.4648	100	106	106	103	103	106	70	67	63	68.5	66.5	65	83	83	81	84
464	ME	F	0	PAX	6	1	KAMPEMBA	2007-12-11	3050	0	0	0	0		2		0	0	2014-04-28	6	6.8	2	26	26.5	26.6	26.55	131.5	131.4	131.45	55.4	55.3	55.35	15.3654	101	107	100	104	100.5	103.5	75	66	57	70.5	66	61.5	88	78	76	91
465	BM	F	0	PAX	6	1	KAMPEMBA	2007-07-11	3350	0	0	0	0		2		0	0	2014-04-28	6	7	3	25	23.1	23.1	23.1	122.1	122.3	122.2	54.6	54.8	54.7	15.4693	97	100	104	98.5	100.5	102	74	44	86	59	80	65	80	63	90	74
466	SF	F	0	PAX	5	1	KAMPEMBA	2007-08-18	3600	0	0	0	0		2		0	0	2014-04-28	6	6.9	2	26	27.4	27.5	27.45	131.3	131.5	131.4	54.8	54.6	54.7	15.8983	105	108	101	106.5	103	104.5	64	68	65	66	64.5	66.5	85	84	85	89
467	MP	F	0	PAX	6	1	KAMPEMBA	2007-04-27	2100	0	0	0	0		2		0	0	2014-04-28	7	7	3	26	22.3	22.3	22.3	117.7	117.8	117.75	54.3	54.1	54.2	16.0836	118	118	115	118	116.5	116.5	54	78	39	66	46.5	58.5	76	88	84	119
468	AM	F	0	PAX	6	1	KAMPEMBA	2006-05-13	3300	0	0	0	0		2		0	0	2014-04-28	7	8	3	26	31.1	31.1	31.1	140.8	140.8	140.8	58.2	58.1	58.15	15.6875	103	95	91	99	97	93	75	58	58	66.5	66.5	58	86	82	80	77
469	MP	F	0	PAX	7	1	KAMPEMBA	2003-09-21	3450	0	0	0	0		2		0	0	2014-04-28	10	10.9	3	26	40.6	40.6	40.6	136.2	136.4	136.3	64.6	64.4	64.5	21.8542	108	94	97	101	102.5	95.5	65	64	77	64.5	71	70.5	82	73	84	83
470	MK	F	0	PAX	7	1	KAMPEMBA	2004-04-10	2700	0	0	0	0		2		0	1	2014-04-28	10	10	3	26	27.5	27.5	27.5	129.2	129.1	129.15	56.8	56.7	56.75	16.4871	115	113	103	114	109	108	69	66	71	67.5	70	68.5	85	84	81	89
471	NM	F	0	PAX	6	1	KAMPEMBA	2005-10-10	2650	0	0	0	0		2		0	0	2014-04-28	8	8.9	3	24	24.4	24.4	24.4	128.6	128.8	128.7	55.8	55.7	55.75	14.731	89	90	93	89.5	91	91.5	48	56	42	52	45	49	63	66	62	66
472	LN	M	1	PAX	8	1	KAMPEMBA	2003-11-24	#NULL!	0	0	0	0		2		0	0	2014-04-28	10	10.8	3	24	25.8	25.9	25.85	133.1	133	133.05	55.6	55.4	55.5	14.6026	96	109	97	102.5	96.5	103	67	70	68	68.5	67.5	69	79	70	79	76
473	KM	F	0	PAX	7	0	KAMPEMBA	2004-01-18	2900	0	0	0	0		2		0	0	2014-04-28	10	10.1	3	23	27.9	27.9	27.9	132.9	132.8	132.85	58.6	58.4	58.5	15.8082	104	102	97	103	100.5	99.5	72	58	55	65	63.5	56.5	80	72	72	79
474	MR	F	0	PAX	8	1	KAMPEMBA	2004-07-10	2950	0	0	0	0		2		0	0	2014-04-28	9	10	3	24	24.4	24.3	24.35	135.1	135.2	135.15	55.6	55.5	55.55	13.3311	121	112	105	116.5	113	108.5	52	51	56	51.5	54	53.5	76	73	68	101
475	MM	M	1	PAX	5	1	KAMPEMBA	2007-01-20	3500	0	0	0	0		2		0	0	2014-04-28	7	7.1	3	24	23.7	23.7	23.7	121.6	121.9	121.75	56.3	56.4	56.35	15.9886	98	97	94	97.5	96	95.5	58	67	64	62.5	61	65.5	82	79	74	94
476	UN	M	1	PAX	4	1	KAMPEMBA	2008-03-29	3500	0	0	0	0		2		0	1	2014-04-21	6	6	2	27	15.5	15.5	15.5	103.3	103.1	103.2	49	49.2	49.1	14.5537	108	111	111	109.5	109.5	111	71	62	65	66.5	68	63.5	83	84	84	87
477	DN	F	0	PAX	4	1	KAMPEMBA	2009-02-26	3800	0	0	0	0		2		0	0	2014-04-21	5	5	2	27	19.8	19.8	19.8	108.7	109	108.85	54.2	54.3	54.25	16.7112	94	95	96	94.5	95	95.5	65	62	57	63.5	61	59.5	76	77	73	101
478	IK	M	1	PAX	4	1	KAMPEMBA	2007-05-21	3820	0	0	0	0		2		0	0	2014-04-21	6	7	3	27	23.8	23.8	23.8	116.4	116.4	116.4	56.6	56.5	56.55	17.5659	104	98	101	101	102.5	99.5	67	65	56	66	61.5	60.5	84	77	78	84
479	NM	F	0	PAX	4	1	KAMPEMBA	2008-02-02	2900	0	0	0	0		2		0	0	2014-04-21	6	6.1	2	27	22.1	22.1	22.1	120	120.1	120.05	52.8	52.8	52.8	15.3344	88	96	99	92	93.5	97.5	59	66	61	62.5	60	63.5	69	78	75	80
480	MK	M	1	PAX	4	1	KAMPEMBA	2007-05-12	2500	0	0	0	0		2		0	0	2014-04-21	6	7	3	27	18.9	18.9	18.9	116.7	116.9	116.8	51.3	51.2	51.25	13.854	103	108	111	105.5	107	109.5	70	75	67	72.5	68.5	71	85	95	86	93
481	MB	M	1	PAX	4	1	KAMPEMBA	2008-11-23	2650	0	0	0	0		2		0	0	2014-04-21	5	5.8	2	27	19.5	19.5	19.5	109.3	109.3	109.3	53.8	53.7	53.75	16.3228	103	103	103	103	103	103	69	64	64	66.5	66.5	64	79	78	76	90
482	MM	M	1	PAX	5	1	KAMPEMBA	2008-10-08	3300	0	0	0	0		2		0	0	2014-04-21	5	5.9	2	27	18.5	18.5	18.5	119	119	119	54.7	54.9	54.8	13.064	115	98	110	106.5	112.5	104	77	64	81	70.5	79	72.5	87	85	87	115
483	DM	F	0	PAX	5	1	KAMPEMBA	2007-05-27	4200	0	0	0	0		2		0	0	2014-04-21	6	7	3	27	36.4	36.4	36.4	122.7	122.5	122.6	66.4	66.3	66.35	24.217	107	100	103	103.5	105	101.5	71	63	59	67	65	61	90	84	77	97
484	OA	M	1	PAX	6	1	KAMPEMBA	2005-12-15	3600	0	0	0	0		2		0	0	2014-04-21	8	8.8	3	27	27	27	27	132.5	132.5	132.5	57.8	57.6	57.7	15.3791	93	93	93	93	93	93	65	52	55	58.5	60	53.5	75	67	69	67
485	IN	F	0	PAX	6	1	KAMPEMBA	2005-09-19	4200	0	0	0	0		2		1	1	2014-04-21	8	8.9	3	27	26	26	26	128.3	128.2	128.25	56.1	56.2	56.15	15.8073	103	108	102	105.5	102.5	105	74	69	69	71.5	71.5	69	90	87	86	106
486	BY	M	1	PAX	8	1	KAMPEMBA	2000-09-01	2850	0	0	0	0		2		0	0	2014-04-21	13	13.9	4	27	38.6	38.6	38.6	150.5	150.2	150.35	61.3	61.1	61.2	17.0758	108	116	115	112	111.5	115.5	74	60	72	67	73	66	84	82	89	94
487	ZM	M	1	PAX	8	1	KAMPEMBA	2004-02-10	4000	0	0	0	0		2		0	0	2014-04-21	10	10.1	3	27	30.3	30.4	30.35	130	130	130	61.5	61.6	61.55	17.9586	100	103	101	101.5	100.5	102	58	69	60	63.5	59	64.5	79	82	77	92
488	BM	F	0	PAX	8	1	KAMPEMBA	2003-10-23	3300	0	0	0	0		2		0	0	2014-04-21	10	10.8	3	27	30.6	30.6	30.6	137.5	137.6	137.55	60.9	60.8	60.85	16.1734	88	108	107	98	97.5	107.5	55	46	49	50.5	52	47.5	68	71	78	86
489	MK	F	0	PAX	8	1	KAMPEMBA	2003-11-05	3580	0	0	0	0		2		0	0	2014-04-21	10	10.8	3	27	37.6	37.7	37.65	151.7	151.7	151.7	63.4	63.5	63.45	16.3604	112	119	116	115.5	114	117.5	71	76	54	73.5	62.5	65	84	85	78	96
490	MT	F	0	PAX	8	1	KAMPEMBA	2004-05-03	3500	0	0	0	0		2		0	0	2014-04-21	9	10	3	27	26.7	26.8	26.75	132.9	132.9	132.9	57.8	57.8	57.8	15.1452	118	110	111	114	114.5	110.5	72	77	67	74.5	69.5	72	100	96	87	102
491	MB	M	1	PAX	7	1	KAMPEMBA	2005-07-07	3250	0	0	0	0		2		0	0	2014-04-21	8	8.9	3	27	26	25.9	25.95	131.9	131.8	131.85	57.6	57.8	57.7	14.9272	99	89	94	94	96.5	91.5	62	59	52	60.5	57	55.5	76	71	68	90
492	NM	F	0	PAX	7	1	KAMPEMBA	2005-09-11	3300	0	0	0	0		2		0	0	2014-04-21	8	8.9	3	27	24.6	24.6	24.6	122.2	122.2	122.2	56.2	56.4	56.3	16.4738	115	109	106	112	110.5	107.5	67	65	62	66	64.5	63.5	84	83	78	93
493	ME	M	1	PAX	7	1	KAMPEMBA	2004-04-08	#NULL!	0	0	0	0		2		0	0	2014-04-21	10	10	3	28	35.7	35.9	35.8	141.5	141.4	141.45	62.6	62.4	62.5	17.8928	108	113	112	110.5	110	112.5	60	68	68	64	64	68	78	82	79	76
494	KM	M	1	PAX	9	1	KAMPEMBA	2002-12-24	#NULL!	0	0	0	0		2		0	1	2014-04-21	11	11.8	4	28	33.3	33.3	33.3	143.6	143.4	143.5	60.5	60.2	60.35	16.1711	101	89	104	95	102.5	96.5	53	59	66	56	59.5	62.5	66	75	80	100
495	MM	M	1	PAX	9	1	KAMPEMBA	2004-04-26	#NULL!	0	0	0	0		2		0	0	2014-04-21	9	10	3	28	30.3	30.3	30.3	134.2	134.3	134.25	60.2	60.3	60.25	16.8118	106	100	100	103	103	100	62	66	64	64	63	65	78	81	78	89
496	KM	M	1	PAX	9	1	KAMPEMBA	2002-08-08	3600	0	0	0	0		2		0	0	2014-04-21	11	11.9	4	28	33.1	33.2	33.15	142.3	142.5	142.4	58.8	58.5	58.65	16.348	106	107	104	106.5	105	105.5	73	81	64	77	68.5	72.5	84	95	83	74
497	KM	M	1	PAX	9	1	KAMPEMBA	2002-12-12	#NULL!	0	0	0	0		2		0	0	2014-04-21	11	11.8	4	28	38.2	38.2	38.2	152.3	152.3	152.3	61.3	61	61.15	16.4689	113	100	99	106.5	106	99.5	69	62	65	65.5	67	63.5	85	80	80	97
498	TT	M	1	PAX	9	1	KAMPEMBA	2001-12-01	#NULL!	0	0	0	0		2		0	0	2014-04-21	12	12.8	4	28	33.7	33.8	33.75	136.6	136.7	136.65	62.7	62.8	62.75	18.074	118	117	118	117.5	118	117.5	61	63	59	62	60	61	89	84	81	106
499	MT	M	1	PAX	9	1	KAMPEMBA	2003-08-22	3000	0	0	0	0		2		0	0	2014-04-21	10	10.9	3	28	45.9	45.9	45.9	153.7	153.6	153.65	68.2	68.2	68.2	19.4423	112	130	117	121	114.5	123.5	70	63	56	66.5	63	59.5	88	85	80	78
500	KB	M	1	PAX	9	1	KAMPEMBA	2003-05-04	#NULL!	0	0	0	0		2		0	0	2014-04-21	10	11	4	28	41.9	41.9	41.9	134.2	134.4	134.3	74.3	74.1	74.2	23.2307	111	116	119	113.5	115	117.5	82	88	71	85	76.5	79.5	94	96	94	77
501	MK	F	0	PAX	9	1	KAMPEMBA	2001-05-31	#NULL!	0	0	0	0		2		0	0	2014-04-21	12	12.9	4	28	35.3	35.3	35.3	142.3	142.3	142.3	60.8	60.5	60.65	17.4327	108	118	121	113	114.5	119.5	69	62	74	65.5	71.5	68	87	86	89	91
502	AW	M	1	PAX	9	1	KAMPEMBA	2008-02-17	#NULL!	0	0	0	0		2		0	1	2014-04-25	6	6.1	2	28	17.8	17.8	17.8	110.3	110.2	110.25	49.3	49.4	49.35	14.6441	90	94	92	92	91	93	64	62	60	63	62	61	72	71	74	108
503	KK	F	0	PAX	8	1	KAMPEMBA	2004-07-01	#NULL!	0	0	0	0		2		1	0	2014-04-25	9	10	3	26	31	31	31	133.3	133.4	133.35	60.8	60.6	60.7	17.4331	117	108	111	112.5	114	109.5	58	61	70	59.5	64	65.5	80	87	84	94
504	KI	M	1	PAX	9	1	KAMPEMBA	2001-06-22	#NULL!	0	0	0	0		2		0	1	2014-04-25	12	12.9	4	28	44	44	44	151.6	151.5	151.55	65.2	65.1	65.15	19.1576	119	126	117	122.5	118	121.5	77	64	68	70.5	72.5	66	95	87	89	95
505	KM	M	1	PAX	8	1	KAMPEMBA	2004-01-18	#NULL!	0	0	0	0		2		0	1	2014-04-25	10	10.1	3	27	33.6	33.6	33.6	135.8	135.6	135.7	60.9	60.6	60.75	18.2465	126	124	106	125	116	115	65	65	53	65	59	59	82	82	74	96
506	KN	M	1	PAX	9	1	KAMPEMBA	2002-03-09	#NULL!	0	0	0	0		2		0	0	2014-04-25	12	12.1	4	28	31.7	31.6	31.65	132.1	132.2	132.15	59.8	59.7	59.75	18.1234	98	118	104	108	101	111	68	82	80	75	74	81	77	91	90	116
507	ML	M	1	PAX	9	1	KAMPEMBA	2003-03-05	#NULL!	0	0	0	0		2		0	0	2014-04-25	11	11.1	4	28	40.5	40.5	40.5	146.5	146.6	146.55	65.8	65.6	65.7	18.8575	104	107	102	105.5	103	104.5	59	70	68	64.5	63.5	69	80	81	79	89
509	YM	M	1	PAX	9	1	KAMPEMBA	2002-07-17	2650	0	0	0	0		2		0	0	2014-04-25	11	11.9	4	27	31.7	31.6	31.65	143.3	143.5	143.4	58.2	58.3	58.25	15.3913	116	119	109	117.5	112.5	114	77	64	68	70.5	72.5	66	98	81	79	95
510	KD	M	1	PAX	9	1	KAMPEMBA	2002-09-02	2900	0	0	0	0		2		0	1	2014-04-25	11	11.9	4	27	32.8	32.8	32.8	137.7	137.8	137.75	60.5	60.6	60.55	17.2858	113	105	113	109	113	109	64	66	63	65	63.5	64.5	84	80	77	112
511	KK	M	1	PAX	8	1	KAMPEMBA	2002-12-16	#NULL!	0	0	0	0		2		1	0	2014-04-25	11	11.8	4	27	39.4	39.4	39.4	150.3	150.1	150.2	64.2	64.2	64.2	17.4645	109	108	117	108.5	113	112.5	73	68	57	70.5	65	62.5	87	86	78	78
512	MA	M	1	PAX	9	1	KAMPEMBA	2001-05-31	2450	0	0	0	0		2		0	1	2014-04-25	12	13	4	28	30.8	30.8	30.8	137.4	137.6	137.5	58.4	58.5	58.45	16.2909	114	106	109	110	111.5	107.5	65	65	64	65	64.5	64.5	84	83	80	100
513	KN	M	1	PAX	9	1	KAMPEMBA	2003-07-14	2900	0	0	0	0		2		1	0	2014-04-25	10	10.9	3	28	29.1	29	29.05	137.7	137.9	137.8	54.6	54.7	54.65	15.2985	120	102	113	111	116.5	107.5	59	63	66	61	62.5	64.5	85	77	79	97
514	UK	M	1	PAX	9	1	KAMPEMBA	2003-03-10	2800	0	0	0	0		2		1	0	2014-04-25	11	11.1	4	28	32	32.1	32.05	143.1	143.3	143.2	56.7	56.5	56.6	15.6294	101	75	96	88	98.5	85.5	56	57	41	56.5	48.5	49	75	64	66	91
515	TM	M	1	PAX	9	1	KAMPEMBA	2008-12-02	#NULL!	0	0	0	0		2		0	1	2014-04-25	5	5.8	2	28	34.6	34.6	34.6	138.3	138.4	138.35	60.3	60.2	60.25	18.0766	94	109	103	101.5	98.5	106	71	50	70	60.5	70.5	60	76	80	78	92
516	TT	M	1	PAX	9	1	KAMPEMBA	2001-12-02	3400	0	0	0	0		2		0	0	2014-04-25	12	12.8	4	28	40.9	40.9	40.9	145.3	145.2	145.25	62.3	62.2	62.25	19.3861	117	108	102	112.5	109.5	105	65	68	70	66.5	67.5	69	85	81	76	96
517	MN	F	0	PAX	9	1	KAMPEMBA	2002-07-07	#NULL!	0	0	0	0		2		0	0	2014-04-25	11	12	4	28	35.2	35.2	35.2	148.9	148.9	148.9	57.8	57.6	57.7	15.8764	100	97	102	98.5	101	99.5	72	71	68	71.5	70	69.5	84	85	80	81
518	MM	F	0	PAX	9	1	KAMPEMBA	2002-11-06	#NULL!	0	0	0	0		2		0	0	2014-04-25	11	11.8	4	28	37.9	37.9	37.9	148.9	148.7	148.8	60.6	60.5	60.55	17.1172	100	98	102	99	101	100	72	70	71	71	71.5	70.5	76	69	70	91
519	MK	F	0	PAX	9	1	KAMPEMBA	2000-07-03	3050	0	0	0	0		2		0	0	2014-04-25	13	14	5	28	50.6	50.7	50.65	153.1	153.3	153.2	64.5	64.4	64.45	21.5805	142	138	117	140	129.5	127.5	74	68	62	71	68	65	108	90	88	125
520	MR	F	0	PAX	9	1	KAMPEMBA	2003-09-29	#NULL!	0	0	0	0		2		0	0	2014-04-25	10	10.8	3	28	32.2	32.1	32.15	142.1	142.3	142.2	54.5	54.4	54.45	15.8994	110	108	98	109	104	103	62	70	72	66	67	71	77	71	66	105
521	NK	F	0	PAX	8	1	KAMPEMBA	2004-05-04	#NULL!	0	0	0	0		2		0	0	2014-04-25	9	10	3	28	57.9	57.9	57.9	145.8	145.7	145.75	87.3	87.2	87.25	27.256	90	102	98	96	94	100	72	66	69	69	70.5	67.5	78	79	74	94
522	MB	F	0	PAX	9	1	KAMPEMBA	2004-10-25	#NULL!	0	0	0	0		2		0	0	2014-04-25	9	9.8	3	28	27.4	27.4	27.4	125.3	125.1	125.2	63.3	63.3	63.3	17.48	124	118	109	121	116.5	113.5	69	71	70	70	69.5	70.5	90	89	90	105
523	MK	F	0	PAX	9	1	KAMPEMBA	2002-06-30	#NULL!	0	0	0	0		2		0	0	2014-04-25	11	11.9	4	28	42.1	42.1	42.1	145.6	145.5	145.55	66.6	66.5	66.55	19.8727	123	111	115	117	119	113	75	84	80	79.5	77.5	82	94	94	93	80
524	KM	F	0	PAX	9	1	KAMPEMBA	2000-05-04	#NULL!	0	0	0	0		2		0	0	2014-04-25	13	14	5	28	43.4	43.3	43.35	145.2	145.4	145.3	65.2	65.2	65.2	20.5333	124	125	120	124.5	122	122.5	69	56	68	62.5	68.5	62	87	82	84	97
525	YO	F	0	PAX	4	1	KAMPEMBA	2008-08-13	#NULL!	0	0	0	0		2		0	0	2014-04-25	5	5.9	2	28	17.9	17.9	17.9	113.3	113.3	113.3	50.2	50.1	50.15	13.9442	109	100	98	104.5	103.5	99	64	70	71	67	67.5	70.5	83	80	79	102
526	MK	M	1	PAX	4	1	KAMPEMBA	2007-07-08	#NULL!	0	0	0	0		2		0	0	2014-04-25	6	7	3	28	19.4	19.4	19.4	115.1	115.2	115.15	52.3	52.4	52.35	14.631	92	109	98	100.5	95	103.5	63	41	70	52	66.5	55.5	73	65	68	96
527	IM	F	0	PAX	4	1	KAMPEMBA	2009-09-27	#NULL!	0	0	0	0		2		0	1	2014-04-25	4	4.8	2	28	19.4	19.4	19.4	110.8	110.6	110.7	52.8	52.9	52.85	15.8309	116	114	71	115	93.5	92.5	68	75	51	71.5	59.5	63	88	88	65	103
528	KT	F	0	PAX	5	1	KAMPEMBA	2007-09-29	4200	0	0	0	0		2		0	0	2014-04-25	6	6.8	2	28	19.2	19.2	19.2	110.3	110.2	110.25	57.3	57.4	57.35	15.7959	95	89	88	92	91.5	88.5	49	59	45	54	47	52	69	69	64	109
529	BK	F	0	PAX	5	1	KAMPEMBA	2007-04-10	#NULL!	0	0	0	0		2		0	0	2014-04-25	7	7	3	28	26.4	26.3	26.35	122.8	122.9	122.85	59.9	59.9	59.9	17.4594	95	86	103	90.5	99	94.5	62	68	57	65	59.5	62.5	77	72	71	94
530	MK	M	1	PAX	5	1	KAMPEMBA	2007-01-23	#NULL!	0	0	0	0		2		0	0	2014-04-25	7	7.1	3	28	23.8	23.9	23.85	124.9	124.8	124.85	54.3	54.2	54.25	15.3007	100	113	98	106.5	99	105.5	60	57	60	58.5	60	58.5	73	75	74	78
531	SM	F	0	PAX	5	1	KAMPEMBA	2007-03-12	#NULL!	0	0	0	0		2		0	0	2014-04-25	7	7.1	3	28	18.9	18.9	18.9	114.2	114.1	114.15	51.8	51.6	51.7	14.5047	89	95	96	92	92.5	95.5	50	60	56	55	53	58	68	74	73	89
532	MT	F	0	PAX	5	1	KAMPEMBA	2007-06-21	#NULL!	0	0	0	0		2		0	0	2014-04-25	6	7	3	28	21.8	21.9	21.85	125.5	125.3	125.4	50.5	50.3	50.4	13.8949	102	104	100	103	101	102	50	66	55	58	52.5	60.5	73	84	77	102
533	MM	M	1	PAX	4	1	KAMPEMBA	2009-05-20	#NULL!	0	0	0	0		2		0	0	2014-04-25	4	5	2	28	18.4	18.4	18.4	108.1	108.1	108.1	52.8	52.7	52.75	15.7459	91	94	98	92.5	94.5	96	60	60	58	60	59	59	76	74	70	90
534	MM	M	1	PAX	4	1	KAMPEMBA	2008-04-11	#NULL!	0	0	0	0		2		0	0	2014-04-25	6	6	2	28	18.5	18.5	18.5	112.5	112.7	112.6	52.5	52.4	52.45	14.5913	98	100	103	99	100.5	101.5	55	58	64	56.5	59.5	61	74	72	76	110
535	BK	F	0	PAX	4	1	KAMPEMBA	2008-09-24	#NULL!	0	0	0	0		2		0	0	2014-04-25	5	5.9	2	28	20.7	20.7	20.7	116.1	116.3	116.2	54.3	54.4	54.35	15.3306	104	98	100	101	102	99	59	64	63	61.5	61	63.5	74	70	68	118
536	KG	M	1	PAX	4	1	KAMPEMBA	2009-01-15	#NULL!	0	0	0	0		2		0	0	2014-04-25	5	5.1	2	28	17.9	17.9	17.9	108.8	108.7	108.75	52.5	52.7	52.6	15.1354	87	93	88	90	87.5	90.5	68	64	70	66	69	67	71	70	72	86
537	KN	M	1	PAX	5	1	KAMPEMBA	2008-12-13	#NULL!	0	0	0	0		2		0	0	2014-04-25	5	5.8	2	28	32.8	23.8	28.3	115.2	115.3	115.25	56.5	56.4	56.45	21.3061	81	98	94	89.5	87.5	96	60	62	64	61	62	63	68	68	70	102
538	NE	F	0	PAX	5	1	KAMPEMBA	2007-07-22	#NULL!	0	0	0	0		2		0	0	2014-04-25	6	6.9	2	28	20.6	20.7	20.65	119.4	119.3	119.35	55.3	55.2	55.25	14.4969	98	91	90	94.5	94	90.5	70	61	68	65.5	69	64.5	81	77	72	102
539	KM	M	1	PAX	4	1	KAMPEMBA	2008-06-27	3700	0	0	0	0		2		0	0	2014-04-22	5	5.9	2	26	19.8	19.8	19.8	112.3	112.1	112.2	52.7	52.1	52.4	15.7282	119	108	107	113.5	113	107.5	67	68	69	67.5	68	68.5	89	83	86	87
540	BM	F	0	PAX	4	1	KAMPEMBA	2009-04-01	#NULL!	0	0	0	0		2		0	0	2014-04-22	5	5.1	2	27	16.8	16.6	16.7	101.9	101.8	101.85	50.1	50.1	50.1	16.0988	105	92	103	98.5	104	97.5	53	50	51	51.5	52	50.5	77	71	74	81
541	NN	M	1	PAX	4	1	KAMPEMBA	2009-01-20	#NULL!	0	0	0	0		2		0	0	2014-04-22	5	5.1	2	27	17.5	17.8	17.65	107	106.9	106.95	52.6	52.4	52.5	15.4306	97	89	91	93	94	90	64	65	66	64.5	65	65.5	75	65	77	108
542	ND	F	0	PAX	4	1	KAMPEMBA	2008-08-10	#NULL!	0	0	0	0		2		0	0	2014-04-22	5	5.9	2	27	20.1	20.1	20.1	114.4	114.3	114.35	52.4	52.1	52.25	15.3718	109	129	106	119	107.5	117.5	65	60	73	62.5	69	66.5	90	84	84	84
543	MN	M	1	PAX	4	1	KAMPEMBA	2009-08-20	#NULL!	0	0	0	0		2		0	0	2014-04-22	4	4.9	2	27	16.2	16.2	16.2	101.4	101.4	101.4	54.6	54.4	54.5	15.7558	94	87	92	90.5	93	89.5	69	61	57	65	63	59	75	72	69	104
544	KM	F	0	PAX	4	1	KAMPEMBA	2008-04-14	#NULL!	0	0	0	0		2		0	0	2014-04-22	6	6	2	27	17.7	17.8	17.75	109.8	109.9	109.85	53.2	53.1	53.15	14.7095	96	103	95	99.5	95.5	99	64	59	54	61.5	59	56.5	79	74	67	80
545	MM	M	1	PAX	5	1	KAMPEMBA	2006-11-09	#NULL!	0	0	0	0		2		0	0	2014-04-22	7	7.8	3	27	19.2	19.2	19.2	115.5	115.5	115.5	51	51	51	14.3925	105	108	122	106.5	113.5	115	76	71	77	73.5	76.5	74	87	83	86	83
546	TM	M	1	PAX	5	1	KAMPEMBA	2006-10-08	#NULL!	0	0	0	0		2		0	1	2014-04-22	7	7.9	3	27	26.5	26.6	26.55	125.3	125.2	125.25	56.6	56.5	56.55	16.9242	90	97	95	93.5	92.5	96	50	45	51	47.5	50.5	48	66	67	68	76
547	MM	M	1	PAX	5	1	KAMPEMBA	2006-09-12	#NULL!	0	0	0	0		2		0	0	2014-04-22	7	7.9	3	27	19.9	19.9	19.9	112.7	112.5	112.6	53.2	53.4	53.3	15.6955	93	87	88	90	90.5	87.5	61	87	58	74	59.5	72.5	80	70	69	73
548	TM	F	0	PAX	5	1	KAMPEMBA	2007-03-03	#NULL!	0	0	0	0		2		0	0	2014-04-22	7	7.1	3	27	22.6	22.7	22.65	122.5	122.3	122.4	52.4	52.2	52.3	15.1184	107	104	96	105.5	101.5	100	67	65	68	66	67.5	66.5	87	82	81	86
549	BB	F	0	PAX	5	1	KAMPEMBA	2006-08-25	2600	0	0	0	0		2		0	0	2014-04-22	7	7.9	3	27	26.4	26.4	26.4	127.6	127.4	127.5	59.6	59.5	59.55	16.2399	112	117	115	114.5	113.5	116	75	74	78	74.5	76.5	76	92	91	93	72
550	MK	F	0	PAX	6	1	KAMPEMBA	2005-05-03	#NULL!	0	0	0	0		2		0	0	2014-04-22	8	9	3	27	30.1	30	30.05	135.7	135.8	135.75	61	61	61	16.3067	97	107	86	102	91.5	96.5	49	61	61	55	55	61	73	73	71	108
551	KM	M	1	PAX	6	1	KAMPEMBA	2006-06-30	2900	0	0	0	0		2		0	0	2014-04-22	7	7.9	3	27	21.6	21.7	21.65	120	120.1	120.05	52.2	52.4	52.3	15.0222	120	124	120	122	120	122	68	74	70	71	69	72	90	89	85	120
552	KN	F	0	PAX	6	1	KAMPEMBA	2006-05-30	#NULL!	0	0	0	0		2		0	0	2014-04-22	7	7.9	3	27	20.6	20.6	20.6	117.7	117.5	117.6	51.2	51	51.1	14.8954	94	90	96	92	95	93	45	55	59	50	52	57	60	67	80	92
553	MM	F	0	PAX	6	1	KAMPEMBA	2005-04-15	#NULL!	0	0	0	0		2		0	0	2014-04-22	9	9	3	27	23.3	23.3	23.3	131	131	131	50.6	50.7	50.65	13.5773	101	96	94	98.5	97.5	95	55	62	52	58.5	53.5	57	73	74	68	96
554	NK	M	1	PAX	6	1	KAMPEMBA	2005-03-06	3000	0	0	0	0		2		1	0	2014-04-22	9	9.1	3	27	26.3	26.3	26.3	135.4	135.1	135.25	58.4	58.5	58.45	14.3774	104	100	103	102	103.5	101.5	58	61	71	59.5	64.5	66	82	78	81	108
555	NA	M	1	PAX	6	1	KAMPEMBA	2006-03-05	#NULL!	0	0	0	0		2		0	0	2014-04-22	8	8.1	3	27	24.4	24.4	24.4	126.6	126.8	126.7	55.4	55.2	55.3	15.1998	119	118	116	118.5	117.5	117	71	40	67	55.5	69	53.5	90	77	88	104
556	ML	M	1	PAX	6	1	KAMPEMBA	2005-07-14	#NULL!	0	0	0	0		2		0	0	2014-04-22	8	8.9	3	27	29.7	29.7	29.7	130.2	130	130.1	64.3	64.2	64.25	17.547	104	106	98	105	101	102	76	63	67	69.5	71.5	65	86	81	80	87
557	BK	M	1	PAX	6	1	KAMPEMBA	2007-08-22	#NULL!	0	0	0	0		2		0	0	2014-04-22	6	6.9	2	27	23.2	23.1	23.15	118.5	118.7	118.6	57.4	57.6	57.5	16.4582	96	92	102	94	99	97	64	66	63	65	63.5	64.5	76	75	75	90
558	NN	F	0	PAX	6	1	KAMPEMBA	2006-04-28	4200	0	0	0	0		2		0	0	2014-04-22	7	8	3	28	19.8	19.7	19.75	118.8	118.7	118.75	51	51	51	14.0055	97	98	99	97.5	98	98.5	59	66	63	62.5	61	64.5	76	78	76	86
559	IB	M	1	PAX	6	1	KAMPEMBA	2005-11-26	3500	0	0	0	0		2		0	0	2014-04-22	8	8.8	3	28	22.7	22.8	22.75	125.4	125.4	125.4	56.4	56.2	56.3	14.4673	99	101	109	100	104	105	52	60	59	56	55.5	59.5	75	76	75	83
560	SS	M	1	PAX	5	1	KAMPEMBA	2005-08-13	#NULL!	0	0	0	0		2		0	0	2014-04-22	8	8.9	3	27	26.4	26.4	26.4	127.6	127.7	127.65	61.5	61.7	61.6	16.2018	101	105	102	103	101.5	103.5	71	61	63	66	67	62	82	79	76	93
561	KN	F	0	PAX	7	1	KAMPEMBA	2001-04-01	#NULL!	0	0	0	0		2		0	0	2014-04-22	13	13.1	4	27	25.4	25.5	25.45	129.8	129.9	129.85	54.9	54.6	54.75	15.094	104	93	89	98.5	96.5	91	72	64	71	68	71.5	67.5	81	78	76	66
562	ML	M	1	PAX	7	1	KAMPEMBA	2005-01-14	#NULL!	0	0	0	0		2		0	0	2014-04-22	9	9.1	3	27	27.2	27.1	27.15	126.4	126.5	126.45	60.2	60	60.1	16.9798	104	106	103	105	103.5	104.5	63	64	53	63.5	58	58.5	80	77	76	68
563	NN	M	1	PAX	8	1	KAMPEMBA	2004-04-01	3600	0	0	0	0		2		0	0	2014-04-22	10	10.1	3	27	30.8	30.9	30.85	137.2	137.5	137.35	56.8	56.5	56.65	16.353	94	84	87	89	90.5	85.5	68	47	53	57.5	60.5	50	82	64	71	105
564	MM	F	0	PAX	8	1	KAMPEMBA	2004-03-22	3650	0	0	0	0		2		1	0	2014-04-22	10	10	3	27	45	45	45	155.8	155.7	155.75	66.2	66.3	66.25	18.5505	110	119	120	114.5	115	119.5	78	69	70	73.5	74	69.5	89	90	87	102
565	AK	F	0	PAX	8	1	KAMPEMBA	2004-05-25	#NULL!	0	0	0	0		2		0	0	2014-04-22	9	10	3	27	51.7	51.8	51.75	148.2	148.4	148.3	66.8	66.5	66.65	23.5303	104	113	114	108.5	109	113.5	56	59	54	57.5	55	56.5	79	86	77	76
566	MM	F	0	PAX	8	1	KAMPEMBA	2004-02-20	#NULL!	0	0	0	0		2		1	0	2014-04-22	10	10.1	3	27	24.9	24.8	24.85	127.3	127.1	127.2	52.6	52.8	52.7	15.3586	113	109	109	111	111	109	73	79	64	76	68.5	71.5	93	85	82	90
567	MM	F	0	LA REFERENCE	3	1	KAMPEMBA	2009-07-12	#NULL!	0	0	0	0		2		0	0	2014-04-10	4	4.9	2	21	16.9	16.9	16.9	99.4	99.6	99.5	54.4	54.5	54.45	17.0703	103	108	98	105.5	100.5	103	61	63	70	62	65.5	66.5	80	74	83	93
568	BM	M	1	LA REFERENCE	3	1	KAMPEMBA	2008-12-17	#NULL!	0	0	0	0		2		0	0	2014-04-10	5	5.7	2	21	16.6	16.6	16.6	104.4	104.8	104.6	48	48.2	48.1	15.1721	119	111	113	115	116	112	83	66	71	74.5	77	68.5	91	87	76	108
569	BI	F	0	LA REFERENCE	3	1	KAMPEMBA	2009-08-13	3870	0	0	0	0		2		0	0	2014-04-10	4	4.9	2	21	17.2	17.2	17.2	99.5	99.4	99.45	50	50.2	50.1	17.3908	101	101	107	101	104	104	83	76	77	79.5	80	76.5	92	91	88	93
570	NB	F	0	LA REFERENCE	3	1	KAMPEMBA	2009-03-05	#NULL!	0	0	0	0		2		0	0	2014-04-10	5	5	2	21	23.5	23.4	23.45	113.3	113.6	113.45	56	56.2	56.1	18.2194	113	105	100	109	106.5	102.5	62	64	69	63	65.5	66.5	73	84	83	89
571	EM	F	0	LA REFERENCE	3	1	KAMPEMBA	2009-10-05	#NULL!	0	0	0	0		2		1	0	2014-04-10	4	4.8	2	20	14.8	14.8	14.8	101.1	101.1	101.1	47	47.2	47.1	14.4797	108	101	95	104.5	101.5	98	80	70	61	75	70.5	65.5	86	85	72	95
572	BM	M	1	LA REFERENCE	3	1	KAMPEMBA	2008-08-06	#NULL!	0	0	0	0		2		0	0	2014-04-10	5	5.9	2	21	23.6	23.6	23.6	122.2	112.2	117.2	59	59	59	17.1813	111	111	103	111	107	107	56	65	44	60.5	50	54.5	76	79	75	95
573	KK	M	1	LA REFERENCE	3	1	KAMPEMBA	2009-05-01	3500	0	0	0	0		2		0	0	2014-04-10	4	5	2	21	17.8	17.8	17.8	103.3	103.3	103.3	51.8	52.9	52.35	16.6809	88	87	93	87.5	90.5	90	55	56	55	55.5	55	55.5	71	70	67	93
574	JB	M	1	LA REFERENCE	3	1	KAMPEMBA	2008-12-30	3600	0	0	0	0		2		0	1	2014-04-10	5	5.7	2	20	18.9	18.1	18.5	107.2	107.7	107.45	48.5	48.5	48.5	16.0236	109	105	114	107	111.5	109.5	65	68	63	66.5	64	65.5	82	83	84	78
575	KM	F	0	LA REFERENCE	3	1	KAMPEMBA	2008-05-28	#NULL!	0	0	0	0		2		0	1	2014-04-10	5	5.9	2	20	21	20.9	20.95	111.1	111	111.05	57.3	58.2	57.75	16.9882	93	95	96	94	94.5	95.5	63	57	40	60	51.5	48.5	74	75	69	82
576	Kx	M	1	LA REFERENCE	3	1	KAMPEMBA	2009-01-31	2780	0	0	0	0		2		0	1	2014-04-10	5	5	2	20	20.3	20.3	20.3	109.9	109.9	109.9	57.3	57	57.15	16.8074	88	99	95	93.5	91.5	97	53	59	60	56	56.5	59.5	72	76	75	97
577	SN	F	0	LA REFERENCE	3	1	KAMPEMBA	2008-11-13	#NULL!	0	0	0	0		2		0	0	2014-04-10	5	5.8	2	20	16.7	16.6	16.65	106.6	106.6	106.6	50.3	50.1	50.2	14.6521	93	84	109	88.5	101	96.5	61	42	56	51.5	58.5	49	73	58	68	91
578	BM	M	1	LA REFERENCE	3	1	KAMPEMBA	2008-09-17	#NULL!	0	0	0	0		2		0	0	2014-04-10	5	5.8	2	20	17.2	17.2	17.2	100.3	100.3	100.3	52.5	52.5	52.5	17.0973	89	96	83	92.5	86	89.5	56	71	58	63.5	57	64.5	68	79	73	96
579	NK	F	0	LA REFERENCE	1	1	KAMPEMBA	2011-02-13	3400	0	0	0	0		2		0	0	2014-04-10	3	3.1	2	21	13.4	13.4	13.4	95.3	95.5	95.4	50	50.2	50.1	14.7234	122	115	116	118.5	119	115.5	58	71	78	64.5	68	74.5	85	86	92	98
580	KC	M	1	LA REFERENCE	1	1	KAMPEMBA	2010-02-19	2500	0	0	0	0		2		0	0	2014-04-10	4	4	2	21	14.2	14.2	14.2	93.3	93.4	93.35	51.3	51.5	51.4	16.2952	104	94	94	99	99	94	64	63	68	63.5	66	65.5	79	78	80	88
581	BB	M	1	LA REFERENCE	1	1	KAMPEMBA	2010-04-28	3100	0	0	0	0		2		0	0	2014-04-10	3	4	2	21	15	15	15	93	93	93	53.7	53.5	53.6	17.343	91	95	88	93	89.5	91.5	63	52	46	57.5	54.5	49	75	76	66	105
582	KL	M	1	LA REFERENCE	1	1	KAMPEMBA	2010-09-08	3400	0	0	0	0		2		0	0	2014-04-10	3	3.9	2	20	13.8	13.8	13.8	90.2	90.5	90.35	51	51	51	16.9053	97	107	101	102	99	104	62	66	56	64	59	61	81	79	75	98
583	NM	F	0	LA REFERENCE	2	1	KAMPEMBA	2009-05-28	#NULL!	0	0	0	0		2		0	0	2014-04-10	4	4.9	2	21	19.1	19.1	19.1	108.3	108.3	108.3	56	56	56	16.2846	91	90	96	90.5	93.5	93	54	58	62	56	58	60	73	76	79	110
584	BM	F	0	LA REFERENCE	2	1	KAMPEMBA	2009-10-13	3500	0	0	0	0		2		0	0	2014-04-10	4	4.8	2	20	20.7	20.7	20.7	108.7	108.7	108.7	55.5	55.5	55.5	17.5191	90	98	83	94	86.5	90.5	59	68	53	63.5	56	60.5	69	72	60	86
585	BZ	F	0	LA REFERENCE	3	1	KAMPEMBA	2009-12-05	3500	0	0	0	0		2		0	0	2014-04-10	4	4.8	2	20	20.8	20.8	20.8	107.7	107.7	107.7	51	51	51	17.9321	102	104	105	103	103.5	104.5	67	49	63	58	65	56	83	96	73	80
586	AN	F	0	LA REFERENCE	3	1	KAMPEMBA	2008-07-06	3500	0	0	0	0		2		0	0	2014-04-10	5	5.9	2	20	20.8	20.8	20.8	110.3	110.2	110.25	55.4	55.5	55.45	17.1122	127	111	118	119	122.5	114.5	74	81	81	77.5	77.5	81	94	93	93	99
587	SK	F	0	LA REFERENCE	3	1	KAMPEMBA	2008-06-05	2500	0	0	0	0		2		0	0	2014-04-10	5	6	2	20	19.3	19.3	19.3	100.7	100.7	100.7	55	55	55	19.0326	98	116	116	107	107	116	48	64	55	56	51.5	59.5	73	85	73	86
588	K	M	1	GABRIELLA	9	1	KAMPEMBA	2001-09-07	4800	0	0	0	0		2		0	0	2014-04-21	12	12.9	4	27	36.8	36.8	36.8	155	155.1	155.05	60	60.2	60.1	15.3075	123	122	114	122.5	118.5	118	78	75	74	76.5	76	74.5	94	96	93	86
589	KT	F	0	GABRIELLA	9	1	KAMPEMBA	2002-08-06	2600	0	0	0	0		2		0	0	2014-04-21	11	11.9	4	26	31.6	31.6	31.6	145.1	145.1	145.1	61.2	61.3	61.25	15.009	112	115	110	113.5	111	112.5	69	64	62	66.5	65.5	63	87	83	84	71
590	NP	F	0	GABRIELLA	9	1	KAMPEMBA	2002-06-12	#NULL!	0	0	0	0		2		0	0	2014-04-21	11	12	4	28	36.2	36.1	36.15	144	144.2	144.1	62.2	62.8	62.5	17.4093	107	105	104	106	105.5	104.5	65	64	55	64.5	60	59.5	83	81	79	105
591	HM	F	0	GABRIELLA	9	1	KAMPEMBA	2002-06-08	#NULL!	0	0	0	0		2		0	0	2014-04-21	11	12	4	26	44.4	44.4	44.4	160	160	160	61.2	61.3	61.25	17.3437	116	119	122	117.5	119	120.5	61	75	64	68	62.5	69.5	84	89	83	77
592	MB	F	0	GABRIELLA	9	1	KAMPEMBA	2003-04-23	3000	0	0	0	0		2		0	0	2014-04-21	10	11	4	24	37.2	37.2	37.2	150.2	150.8	150.5	60.4	60.4	60.4	16.4237	136	120	130	128	133	125	71	81	70	76	70.5	75.5	94	91	94	109
593	SK	F	0	GABRIELLA	9	1	KAMPEMBA	2002-08-20	2900	0	0	0	0		2		1	0	2014-04-21	11	11.9	4	24	31.5	31.5	31.5	149.4	149.4	149.4	55.2	55.3	55.25	14.1127	111	127	120	119	115.5	123.5	63	70	67	66.5	65	68.5	90	91	86	97
594	MM	M	1	GABRIELLA	9	1	KAMPEMBA	2000-06-24	3150	0	0	0	0		2		0	0	2014-04-21	13	13.9	4	27	49.9	49.9	49.9	165.1	165.1	165.1	67.8	67.8	67.8	18.3065	107	108	105	107.5	106	106.5	64	60	68	62	66	64	86	87	81	57
595	NB	F	0	GABRIELLA	9	1	KAMPEMBA	2002-05-16	3680	0	0	0	0		2		0	0	2014-04-21	11	12	4	26	26.8	26.8	26.8	134.6	134.5	134.55	61.8	61.8	61.8	14.8036	103	100	109	101.5	106	104.5	67	53	54	60	60.5	53.5	81	83	74	83
596	NB	F	0	GABRIELLA	9	1	KAMPEMBA	2001-10-02	#NULL!	0	0	0	0		2		0	0	2014-04-21	12	12.9	4	27	43.1	43.1	43.1	161.1	161.1	161.1	60.1	61.3	60.7	16.6068	123	114	113	118.5	118	113.5	71	63	60	67	65.5	61.5	85	86	78	95
597	JT	M	1	GABRIELLA	9	1	KAMPEMBA	2002-06-15	2800	0	0	0	0		2		0	0	2014-04-21	11	12	4	27	37.5	37.5	37.5	153.2	153.2	153.2	64.1	64.8	64.45	15.9777	98	102	97	100	97.5	99.5	65	66	70	65.5	67.5	68	78	81	83	70
598	LK	M	1	GABRIELLA	9	1	KAMPEMBA	2000-05-05	3100	0	0	0	0		2		0	0	2014-04-21	13	14	5	27	36	36	36	152.3	152.1	152.2	61.1	61.3	61.2	15.5408	110	99	94	104.5	102	96.5	67	56	59	61.5	63	57.5	83	66	72	86
599	LN	M	1	GABRIELLA	9	1	KAMPEMBA	2001-09-29	3600	0	0	0	0		2		0	0	2014-04-21	12	12.8	4	27	37.7	37.7	37.7	149.7	149.7	149.7	63.2	63.5	63.35	16.8228	97	125	99	111	98	112	60	84	64	72	62	74	77	91	77	86
600	KK	F	0	GABRIELLA	9	1	KAMPEMBA	2002-10-11	3200	0	0	0	0		2		0	0	2014-04-21	11	11.8	4	28	42	42	42	152.5	152.5	152.5	66.3	67.1	66.7	18.0597	132	123	117	127.5	124.5	120	76	74	86	75	81	80	83	89	98	94
601	KM	F	0	GABRIELLA	9	1	KAMPEMBA	2001-12-09	2800	0	0	0	0		2		0	0	2014-04-21	12	12.8	4	27	35.5	35.5	35.5	154.1	154.2	154.15	59	59.1	59.05	14.9397	110	107	112	108.5	111	109.5	67	72	59	69.5	63	65.5	86	89	79	83
602	CM	M	1	GABRIELLA	9	1	KAMPEMBA	2000-05-30	#NULL!	0	0	0	0		2		0	0	2014-04-21	13	13.9	4	27	56.5	56.5	56.5	170.4	170.4	170.4	71.2	71.6	71.4	19.4585	109	107	114	108	111.5	110.5	74	73	73	73.5	73.5	73	86	86	89	74
603	DM	M	1	GABRIELLA	8	1	KAMPEMBA	2002-08-10	3000	0	0	0	0		2		0	0	2014-04-22	11	11.9	4	27	27.8	27.8	27.8	133.1	132.8	132.95	55.4	54.9	55.15	15.7278	101	102	98	101.5	99.5	100	57	68	69	62.5	63	68.5	84	83	81	79
604	BT	M	1	GABRIELLA	9	1	KAMPEMBA	2002-06-06	2800	0	0	0	0		2		0	0	2014-04-21	11	12	4	28	32.3	32.3	32.3	148.5	148.2	148.35	58.3	58.1	58.2	14.6767	116	107	98	111.5	107	102.5	69	69	63	69	66	66	88	83	79	66
605	FA	F	0	GABRIELLA	8	1	KAMPEMBA	2002-08-08	3800	0	0	0	0		2		0	0	2014-04-22	11	11.9	4	24	44.2	44.1	44.15	162.6	162	162.3	63	63	63	16.7608	110	107	113	108.5	111.5	110	75	74	73	74.5	74	73.5	96	85	90	68
606	KM	F	0	GABRIELLA	8	1	KAMPEMBA	2000-07-27	5800	0	0	0	0		2		0	0	2014-04-22	13	13.9	4	27	38.4	38.4	38.4	153.9	153.8	153.85	60.5	60.2	60.35	16.2232	155	114	118	134.5	136.5	116	86	76	75	81	80.5	75.5	101	95	88	101
607	IJ	M	1	GABRIELLA	8	1	KAMPEMBA	2003-06-21	4000	0	0	0	0		2		0	0	2014-04-22	10	10.9	3	24	31.3	31.3	31.3	143.5	143.3	143.4	55.2	55.3	55.25	15.2211	111	114	118	112.5	114.5	116	73	69	62	71	67.5	65.5	93	95	83	64
608	BZ	F	0	GABRIELLA	8	1	KAMPEMBA	2003-07-22	2500	0	0	0	0		2		0	0	2014-04-22	10	10.9	3	24	27.8	27.8	27.8	139.4	139.4	139.4	56.1	56.1	56.1	14.306	106	106	92	106	99	99	72	61	66	66.5	69	63.5	80	76	76	83
609	MJ	M	1	GABRIELLA	8	1	KAMPEMBA	2004-08-29	3150	0	0	0	0		2		0	0	2014-04-22	9	9.9	3	24	32.9	32.9	32.9	147.6	147.6	147.6	61.2	61.2	61.2	15.1016	115	116	110	115.5	112.5	113	81	75	62	78	71.5	68.5	103	91	81	66
610	KF	F	0	GABRIELLA	8	1	KAMPEMBA	2003-09-03	#NULL!	0	0	0	0		2		0	0	2014-04-22	10	10.9	3	24	26.7	26.7	26.7	136.4	136.4	136.4	53.4	53.5	53.45	14.351	99	96	105	97.5	102	100.5	83	71	61	77	72	66	90	83	76	83
611	NM	M	1	GABRIELLA	8	1	KAMPEMBA	2003-08-07	2800	0	0	0	0		2		0	0	2014-04-22	10	10.9	3	24	28.5	28.5	28.5	146.9	146.7	146.8	58.2	58.4	58.3	13.2249	129	126	125	127.5	127	125.5	86	78	77	82	81.5	77.5	104	92	98	73
655	KN	M	1	GABRIELLA	7	1	KAMPEMBA	2004-05-28	3200	0	0	0	0		2		0	0	2014-04-23	9	10	3	27	25.8	25.8	25.8	139.5	139.5	139.5	55.6	55.6	55.6	13.2578	101	94	101	97.5	101	97.5	71	52	54	61.5	62.5	53	85	76	74	76
656	KM	F	0	GABRIELLA	7	1	KAMPEMBA	2005-02-03	2100	0	0	0	0		2		0	0	2014-04-23	9	9.1	3	28	23.4	23.4	23.4	125.7	125.7	125.7	54.7	54.7	54.7	14.8097	87	89	93	88	90	91	59	63	57	61	58	60	66	70	69	83
657	NM	M	1	GABRIELLA	10	1	KAMPEMBA	2001-01-01	#NULL!	0	0	0	0		2		0	0	2014-04-23	13	13.2	4	27	46.3	46.3	46.3	155.3	155.3	155.3	70	70	70	19.1972	107	111	107	109	107	109	67	68	67	67.5	67	67.5	88	87	82	86
658	KT	M	1	GABRIELLA	7	1	KAMPEMBA	2004-07-16	3100	0	0	0	0		2		0	0	2014-04-23	9	9.9	3	28	27	27	27	139.3	139.3	139.3	55.3	55.3	55.3	13.9143	113	112	109	112.5	111	110.5	62	66	66	64	64	66	82	91	86	89
659	BK	M	1	GABRIELLA	7	1	KAMPEMBA	2003-01-20	#NULL!	0	0	0	0		2		1	0	2014-04-23	11	11.1	4	28	28.9	28.9	28.9	136.3	136.3	136.3	59.1	59.1	59.1	15.5563	103	101	102	102	102.5	101.5	67	63	62	65	64.5	62.5	86	83	77	83
660	KS	F	0	GABRIELLA	7	1	KAMPEMBA	2004-10-09	2600	0	0	0	0		2		0	0	2014-04-23	9	9.9	3	28	24.8	24.8	24.8	137.7	137.7	137.7	52.5	52.5	52.5	13.0793	100	95	99	97.5	99.5	97	59	59	54	59	56.5	56.5	74	75	72	87
661	MS	F	0	GABRIELLA	9	1	KAMPEMBA	2001-02-28	#NULL!	0	0	0	0		2		0	0	2014-04-23	13	13	4	27	38.2	38.2	38.2	152	152	152	57.1	56.9	57	16.5339	122	129	125	125.5	123.5	127	75	82	74	78.5	74.5	78	97	99	97	81
662	NI	F	0	GABRIELLA	7	1	KAMPEMBA	2004-09-22	#NULL!	0	0	0	0		2		0	1	2014-04-24	9	9.9	3	27	37.1	37.1	37.1	146.3	146.3	146.3	62.7	62.7	62.7	17.3335	148	115	111	131.5	129.5	113	62	66	59	64	60.5	62.5	86	81	82	73
663	IA	M	1	GABRIELLA	7	1	KAMPEMBA	2004-05-10	3500	0	0	0	0		2		0	0	2014-04-24	9	10	3	27	36.6	36.6	36.6	145.5	145.5	145.5	63.7	63.7	63.7	17.2884	106	106	112	106	109	109	79	76	89	77.5	84	82.5	91	87	99	75
664	IJ	M	1	GABRIELLA	7	1	KAMPEMBA	2004-02-25	#NULL!	0	0	0	0		2		1	0	2014-04-24	10	10.1	3	28	23.8	23.8	23.8	128.6	128.6	128.6	53.5	53.5	53.5	14.3911	93	103	101	98	97	102	74	64	63	69	68.5	63.5	84	79	79	94
665	SN	M	1	GABRIELLA	10	1	KAMPEMBA	1998-08-01	3900	0	0	0	0		2		0	0	2014-04-24	15	15.9	5	28	45	45	45	167.2	167.2	167.2	64.1	64.1	64.1	16.0968	103	105	111	104	107	108	59	65	75	62	67	70	79	79	87	78
666	MM	M	1	GABRIELLA	10	1	KAMPEMBA	1998-03-04	#NULL!	0	0	0	0		2		0	0	2014-04-24	16	16.1	5	28	57.2	57.2	57.2	174.2	174.2	174.2	70.5	70.5	70.5	18.8495	114	132	135	123	124.5	133.5	68	67	74	67.5	71	70.5	93	96	96	70
667	BN	M	1	GABRIELLA	7	1	KAMPEMBA	2006-05-18	3300	0	0	0	0		2		0	0	2014-04-24	7	8	3	28	29.6	29.6	29.6	138.2	138.2	138.2	56.3	56.3	56.3	15.498	118	110	102	114	110	106	68	67	65	67.5	66.5	66	79	82	83	89
668	BM	F	0	GABRIELLA	10	1	KAMPEMBA	2000-11-05	#NULL!	0	0	0	0		2		0	0	2014-04-24	13	13.8	4	29	65.2	65.2	65.2	164.3	164.3	164.3	80.5	80.5	80.5	24.1531	114	133	123	123.5	118.5	128	68	68	67	68	67.5	67.5	95	100	100	105
669	MY	F	0	GABRIELLA	10	1	KAMPEMBA	2000-02-28	#NULL!	0	0	0	0		2		0	0	2014-04-24	14	14	5	28	57.1	57.1	57.1	167.4	167.4	167.4	73.1	73.1	73.1	20.3763	110	112	114	111	112	113	70	69	63	69.5	66.5	66	89	83	83	90
670	AV	F	0	GABRIELLA	6	1	KAMPEMBA	2006-08-07	2800	0	0	0	0		2		0	0	2014-04-28	7	7.9	3	26	24.6	24.6	24.6	123.5	123.5	123.5	52.3	52.3	52.3	16.1288	110	113	120	111.5	115	116.5	77	76	77	76.5	77	76.5	99	96	90	101
671	MT	F	0	GABRIELLA	6	1	KAMPEMBA	2005-04-24	3850	0	0	0	0		2		0	0	2014-04-24	9	9	3	26	20.8	20.8	20.8	121.5	121.5	121.5	49.3	49.3	49.3	14.09	106	96	104	101	105	100	76	74	67	75	71.5	70.5	88	84	90	90
672	KM	M	1	GABRIELLA	6	1	KAMPEMBA	2005-08-17	5200	0	0	0	0		2		0	0	2014-04-24	8	8.9	3	26	22.9	22.9	22.9	123.1	123.1	123.1	53	53	53	15.1119	105	100	112	102.5	108.5	106	73	63	69	68	71	66	86	83	85	71
673	KN	M	1	GABRIELLA	5	1	KAMPEMBA	2007-10-18	3750	0	0	0	0		2		0	0	2014-04-28	6	6.8	2	26	28.2	28.2	28.2	127.9	127.9	127.9	55.2	55.2	55.2	17.2388	130	131	130	130.5	130	130.5	72	63	75	67.5	73.5	69	100	81	92	97
674	NM	F	0	GABRIELLA	6	1	KAMPEMBA	2006-06-23	#NULL!	0	0	0	0		2		0	0	2014-04-28	7	8	3	26	21.1	21.1	21.1	121.2	121.2	121.2	54.7	54.7	54.7	14.3641	116	117	113	116.5	114.5	115	93	75	78	84	85.5	76.5	104	97	94	95
675	BM	M	1	GABRIELLA	5	1	KAMPEMBA	2007-03-01	2500	0	0	0	0		2		0	0	2014-04-28	7	7.1	3	27	23.9	23.9	23.9	118.5	118.3	118.4	57	57.2	57.1	17.0488	71	93	96	82	83.5	94.5	58	67	57	62.5	57.5	62	62	78	75	107
676	KK	F	0	GABRIELLA	5	1	KAMPEMBA	2007-08-12	2900	0	0	0	0		2		0	0	2014-04-28	6	6.9	2	24	23.9	23.9	23.9	127.8	127.8	127.8	48.3	48.3	48.3	14.6331	96	108	97	102	96.5	102.5	61	73	68	67	64.5	70.5	78	87	84	79
677	MK	F	0	GABRIELLA	6	1	KAMPEMBA	2008-01-14	3400	0	0	0	0		2		0	0	2014-04-28	6	6.1	2	26	23.6	23.6	23.6	121.6	121.6	121.6	56.5	56.5	56.5	15.9604	112	107	98	109.5	105	102.5	63	62	68	62.5	65.5	65	80	77	80	108
678	TM	F	0	GABRIELLA	7	1	KAMPEMBA	2004-07-09	3400	0	0	0	0		2		0	0	2014-04-24	9	10	3	28	31	31	31	145.2	145.2	145.2	56.4	56.4	56.4	14.7038	95	102	100	98.5	97.5	101	60	63	60	61.5	60	61.5	74	78	76	80
679	KM	F	0	GABRIELLA	7	1	KAMPEMBA	2003-12-20	3000	0	0	0	0		2		0	0	2014-04-24	10	10.8	3	28	29.8	29.8	29.8	143.3	143.3	143.3	56.2	56.2	56.2	14.5119	102	99	99	100.5	100.5	99	68	70	66	69	67	68	86	83	80	83
680	SR	F	0	GABRIELLA	10	1	KAMPEMBA	2001-05-16	#NULL!	0	0	0	0		2		0	1	2014-04-24	12	13	4	28	53.6	53.6	53.6	169.5	169.5	169.5	65.3	65.3	65.3	18.6563	106	113	110	109.5	108	111.5	77	61	63	69	70	62	91	80	82	93
681	MN	F	0	GABRIELLA	7	1	KAMPEMBA	2003-10-25	#NULL!	0	0	0	0		2		0	0	2014-04-24	10	10.8	3	29	25.4	25.4	25.4	135.3	135.3	135.3	54.9	54.9	54.9	13.8752	89	102	92	95.5	90.5	97	70	74	62	72	66	68	74	82	72	98
682	KG	M	1	GABRIELLA	6	1	KAMPEMBA	2005-04-30	3200	0	0	0	0		2		0	0	2014-04-24	8	9	3	28	20.5	20.5	20.5	125.3	125.3	125.3	50.6	50.6	50.6	13.0572	120	115	114	117.5	117	114.5	75	76	77	75.5	76	76.5	91	93	98	87
683	TD	F	0	GABRIELLA	7	1	KAMPEMBA	2004-04-24	#NULL!	0	0	0	0		2		0	0	2014-04-24	10	10	3	27	37.1	37.1	37.1	152.3	152.3	152.3	57.4	57.4	57.4	15.9946	131	123	131	127	131	127	76	81	90	78.5	83	85.5	103	96	98	114
684	EM	M	1	GABRIELLA	6	1	KAMPEMBA	2006-04-04	4500	0	0	0	0		2		0	0	2014-04-24	8	8.1	3	29	26.1	26.1	26.1	127.1	127.1	127.1	56.1	56.1	56.1	16.1566	94	95	95	94.5	94.5	95	58	68	56	63	57	62	74	77	74	79
685	KN	F	0	GABRIELLA	6	1	KAMPEMBA	2004-10-09	#NULL!	0	0	0	0		2		0	0	2014-04-24	9	9.9	3	28	32.1	32.1	32.1	139.1	139.1	139.1	59.4	59.4	59.4	16.5902	131	122	127	126.5	129	124.5	70	63	63	66.5	66.5	63	94	84	83	99
686	KD	F	0	GABRIELLA	7	1	KAMPEMBA	2002-04-10	#NULL!	0	0	0	0		2		0	1	2014-04-24	12	12	4	27	34.7	34.7	34.7	144.7	144.7	144.7	57.5	57.5	57.5	16.5727	111	111	113	111	112	112	66	74	69	70	67.5	71.5	83	89	84	71
687	BB	F	0	GABRIELLA	7	1	KAMPEMBA	2004-05-17	3800	0	0	0	0		2		0	0	2014-04-24	9	10	3	27	34.6	34.6	34.6	145.2	145.2	145.2	67.3	67.3	67.3	16.4113	121	122	123	121.5	122	122.5	72	68	71	70	71.5	69.5	72	92	87	111
688	KP	F	0	GABRIELLA	10	1	KATUBA	1999-11-27	#NULL!	0	0	0	0		2		0	0	2014-04-24	14	14.8	5	28	55.3	55.3	55.3	160.1	160.1	160.1	76.2	76.2	76.2	21.5746	111	107	105	109	108	106	74	66	61	70	67.5	63.5	89	81	77	84
689	MN	M	1	GABRIELLA	6	1	KAMPEMBA	2005-01-17	2800	0	0	0	0		2		0	0	2014-04-24	9	9.1	3	28	26.3	26.3	26.3	132.3	132.3	132.3	57.2	57.2	57.2	15.0257	93	92	89	92.5	91	90.5	60	72	60	66	60	66	73	74	68	80
690	MJ	F	0	GABRIELLA	6	1	KAMPEMBA	2005-12-22	4100	0	0	0	0		2		0	0	2014-04-24	8	8.8	3	28	19.7	19.7	19.7	123.5	123.5	123.5	51.4	51.4	51.4	12.9161	111	111	114	111	112.5	112.5	81	73	68	77	74.5	70.5	92	88	83	101
691	MK	F	0	GABRIELLA	10	1	KAMPEMBA	1999-08-11	#NULL!	0	0	0	0		2		0	0	2014-04-24	14	14.9	5	28	65.6	65.6	65.6	161	161	161	67.1	67.1	67.1	25.3077	109	103	103	106	106	103	64	61	62	62.5	63	61.5	83	78	78	73
692	NB	M	1	GABRIELLA	7	1	KAMPEMBA	2005-11-19	3400	0	0	0	0		2		0	0	2014-04-24	8	8.8	3	27	28.1	28.1	28.1	135.2	135.2	135.2	57.1	57.2	57.15	15.3728	97	101	100	99	98.5	100.5	57	62	70	59.5	63.5	66	73	87	84	66
693	MN	F	0	GABRIELLA	7	1	KAMPEMBA	2003-10-10	2500	0	0	0	0		2		0	0	2014-04-24	10	10.9	3	27	45.7	45.7	45.7	157.2	157.3	157.25	66.2	66.2	66.2	18.4814	112	123	116	117.5	114	119.5	75	74	99	74.5	87	86.5	93	85	86	92
694	MK	F	0	GABRIELLA	6	1	KAMPEMBA	2003-06-30	#NULL!	0	0	0	0		2		0	0	2014-04-24	10	10.9	3	28	30.3	30.3	30.3	143.6	143.6	143.6	58.5	58.5	58.5	14.6938	103	105	103	104	103	104	66	68	66	67	66	67	80	83	80	96
695	KM	M	1	GABRIELLA	6	1	KAMPEMBA	2006-03-30	3200	0	0	0	0		2		0	0	2014-04-24	8	8	3	28	29	29	29	129.7	129.7	129.7	63.5	63.5	63.5	17.2392	118	107	110	112.5	114	108.5	71	59	66	65	68.5	62.5	88	80	85	106
696	MK	M	1	GABRIELLA	6	1	KAMPEMBA	2006-10-10	#NULL!	0	0	0	0		2		0	0	2014-04-24	7	7.9	3	28	29.4	29.4	29.4	132	132	132	58.5	58.5	58.5	16.8733	134	120	115	127	124.5	117.5	89	64	78	76.5	83.5	71	113	86	89	113
697	K	M	1	GABRIELLA	6	1	KAMPEMBA	2005-03-20	3000	0	0	0	0		2		0	0	2014-04-24	9	9	3	28	28.8	28.8	28.8	139.5	139.5	139.5	55.8	55.8	55.8	14.7994	117	107	103	112	110	105	68	74	62	71	65	68	83	86	76	90
698	BK	M	1	GABRIELLA	6	1	KAMPEMBA	2005-09-08	#NULL!	0	0	0	0		2		0	0	2014-04-24	8	8.9	3	29	33.5	33.5	33.5	144.7	144.7	144.7	58.5	58.5	58.5	15.9995	115	106	109	110.5	112	107.5	68	82	78	75	73	80	89	91	93	82
699	KS	F	0	GABRIELLA	6	1	KAMPEMBA	2006-04-20	#NULL!	0	0	0	0		2		0	0	2014-04-24	8	8	3	29	24.8	24.8	24.8	131	131	131	52.3	52.3	52.3	14.4514	108	106	107	107	107.5	106.5	72	73	75	72.5	73.5	74	86	89	86	100
700	KM	F	0	GABRIELLA	6	1	KAMPEMBA	2005-05-05	#NULL!	0	0	0	0		2		0	0	2014-04-24	8	9	3	29	22.4	22.4	22.4	134	134	134	49.8	49.8	49.8	12.4749	106	108	105	107	105.5	106.5	65	60	61	62.5	63	60.5	79	77	75	113
701	ND	F	0	GABRIELLA	10	1	KAMPEMBA	2001-09-18	2800	0	0	0	0		2		0	0	2014-04-23	12	12.9	4	28	61.5	61.5	61.5	163.3	163.3	163.3	73.1	73.1	73.1	23.0623	106	110	106	108	106	108	57	61	72	59	64.5	66.5	79	83	84	78
702	KF	F	0	GABRIELLA	5	1	KAMPEMBA	2007-12-04	2800	0	0	0	0		2		0	0	2014-04-29	6	6.8	2	24	21.6	21.7	21.65	118.6	118.6	118.6	54.2	53.9	54.05	15.3918	99	95	97	97	98	96	66	54	58	60	62	56	79	70	74	110
703	MK	F	0	GABRIELLA	5	1	KAMPEMBA	2005-05-20	3700	0	0	0	0		2		0	0	2014-04-29	8	9	3	27	25.8	25.8	25.8	129.5	129.5	129.5	55	55.2	55.1	15.3844	95	85	70	90	82.5	77.5	52	44	45	48	48.5	44.5	70	57	54	88
704	KT	M	1	GABRIELLA	5	1	KAMPEMBA	2006-12-01	3775	0	0	0	0		2		0	0	2014-04-29	7	7.8	3	24	23.8	23.9	23.85	122.6	122.6	122.6	55.6	55.6	55.6	15.8675	102	104	98	103	100	101	59	57	58	58	58.5	57.5	84	77	72	72
705	TN	M	1	GABRIELLA	4	1	KAMPEMBA	2008-08-08	3500	0	0	0	0		2		1	0	2014-04-29	5	5.9	2	27	17.9	17.9	17.9	108.5	108.7	108.6	51	51.1	51.05	15.1773	77	77	88	77	82.5	82.5	56	55	50	55.5	53	52.5	64	62	62	81
706	MA	F	0	GABRIELLA	5	1	KAMPEMBA	2007-06-07	2800	0	0	0	0		2		0	1	2014-04-29	6	7	3	27	21.6	21.6	21.6	122.7	122.5	122.6	50.5	50.5	50.5	14.3705	88	96	92	92	90	94	61	62	56	61.5	58.5	59	65	78	71	98
707	DL	F	0	GABRIELLA	5	1	KAMPEMBA	2006-08-12	#NULL!	0	0	0	0		2		0	0	2014-04-29	7	7.9	3	27	20.3	20.3	20.3	119.5	119.5	119.5	55.1	55.2	55.15	14.2154	94	98	99	96	96.5	98.5	74	57	55	65.5	64.5	56	78	77	78	85
708	YK	M	1	GABRIELLA	5	1	KAMPEMBA	2007-03-07	#NULL!	0	0	0	0		2		0	0	2014-04-29	7	7.1	3	23	23.8	23.8	23.8	121.9	122	121.95	53.5	53.5	53.5	16.0034	88	86	85	87	86.5	85.5	55	56	44	55.5	49.5	50	72	71	57	100
709	AS	F	0	GABRIELLA	4	1	KAMPEMBA	2008-11-10	3400	0	0	0	0		2		0	0	2014-04-29	5	5.8	2	27	22.2	22.2	22.2	114.1	113.9	114	53.7	53.8	53.75	17.0822	97	93	95	95	96	94	70	68	62	69	66	65	79	76	70	98
710	MA	F	0	GABRIELLA	4	1	KAMPEMBA	2008-07-02	#NULL!	0	0	0	0		2		0	0	2014-04-29	5	6	2	27	20	20	20	113.1	133	123.05	52	52.1	52.05	13.2089	86	106	98	96	92	102	45	55	52	50	48.5	53.5	60	75	72	68
711	AA	F	0	GABRIELLA	4	1	KAMPEMBA	2008-01-14	1900	0	0	0	0		2		0	0	2014-04-29	6	6.1	2	27	20.1	20.1	20.1	114	114	114	53	53.2	53.1	15.4663	96	93	101	94.5	98.5	97	57	50	51	53.5	54	50.5	74	70	70	98
712	DM	M	1	GABRIELLA	4	1	KAMPEMBA	2007-04-17	3600	0	0	0	0		#NULL!		0	0	2014-04-29	7	7	3	28	19.1	19.1	19.1	117	117.2	117.1	52.3	52.1	52.2	13.929	121	113	118	117	119.5	115.5	69	67	65	68	67	66	90	83	83	88
713	BN	F	0	GABRIELLA	4	1	KAMPEMBA	2007-12-17	3200	0	0	0	0		2		0	0	2014-04-29	6	6.8	2	27	16.7	16.7	16.7	111.5	111.2	111.35	52.3	52	52.15	13.469	112	108	97	110	104.5	102.5	70	69	62	69.5	66	65.5	84	84	78	89
714	MD	F	0	GABRIELLA	4	1	KAMPEMBA	2006-10-07	3000	0	0	0	0		2		0	0	2014-04-29	7	7.9	3	27	19.5	19.5	19.5	119.8	119.8	119.8	49.3	49.5	49.4	13.5869	84	94	93	89	88.5	93.5	60	61	70	60.5	65	65.5	69	74	76	80
715	EN	M	1	GABRIELLA	5	1	KAMPEMBA	2007-05-09	#NULL!	0	0	0	0		2		1	0	2014-04-29	6	7	3	24	24.2	24.2	24.2	120.3	120.3	120.3	55.5	55.8	55.65	16.7218	107	92	102	99.5	104.5	97	67	57	66	62	66.5	61.5	88	70	78	77
716	MK	M	1	GABRIELLA	5	1	KAMPEMBA	2007-10-21	4100	0	0	0	0		2		0	0	2014-04-28	6	6.8	2	27	20.5	20.5	20.5	111.4	111.2	111.3	52.2	52.4	52.3	16.5487	97	94	92	95.5	94.5	93	57	74	56	65.5	56.5	65	76	78	71	81
717	MN	M	1	GABRIELLA	4	1	KAMPEMBA	2007-05-19	3100	0	0	0	0		2		0	0	2014-04-29	6	7	3	27	23.4	23.4	23.4	121.5	121.3	121.4	55.5	55.2	55.35	15.8774	93	97	93	95	93	95	68	70	50	69	59	60	76	79	70	97
718	PN	M	1	GABRIELLA	5	1	KAMPEMBA	2007-10-13	#NULL!	0	0	0	0		2		0	0	2014-04-29	6	6.9	2	27	19.2	19.2	19.2	116.7	116.5	116.6	50.2	50.2	50.2	14.1223	106	86	95	96	100.5	90.5	55	55	62	55	58.5	58.5	75	70	70	71
720	KK	M	1	GABRIELLA	5	1	KAMPEMBA	2007-07-30	3200	0	0	0	0		2		0	0	2014-04-25	6	6.9	2	27	27.2	27.2	27.2	125.8	125.8	125.8	57.3	57.3	57.3	17.1873	108	98	97	103	102.5	97.5	70	63	64	66.5	67	63.5	81	77	72	84
721	LK	M	1	GABRIELLA	6	1	KAMPEMBA	2006-03-15	2900	0	0	0	0		2		0	1	2014-04-28	8	8.1	3	28	22.8	22.8	22.8	122.2	122.5	122.35	52.3	52.6	52.45	15.2309	93	92	97	92.5	95	94.5	65	65	62	65	63.5	63.5	78	78	77	86
722	AT	M	1	GABRIELLA	6	1	KAMPEMBA	2006-05-24	#NULL!	0	0	0	0		#NULL!		0	0	2014-04-28	7	8	3	24	21.9	21.9	21.9	123	123	123	55.2	55.2	55.2	14.4755	129	121	123	125	126	122	82	79	79	80.5	80.5	79	108	99	93	110
723	ME	M	1	GABRIELLA	6	1	KAMPEMBA	2005-05-01	#NULL!	0	0	0	0		2		0	0	2014-04-28	8	9	3	26	25.8	25.8	25.8	128.2	128.4	128.3	56.2	56.2	56.2	15.6735	96	99	100	97.5	98	99.5	68	68	59	68	63.5	63.5	78	79	80	80
724	MT	F	0	GABRIELLA	7	1	KAMPEMBA	2004-06-03	3670	0	0	0	0		2		1	0	2014-04-24	9	10	3	28	33.2	33.2	33.2	146.4	146.4	146.4	54.5	54.5	54.5	15.4902	131	138	126	134.5	128.5	132	78	83	77	80.5	77.5	80	98	102	91	67
725	KM	F	0	GABRIELLA	6	1	KAMPEMBA	2006-10-15	#NULL!	0	0	0	0		2		0	0	2014-04-20	7	7.8	3	28	23.8	23.7	23.75	128.3	128.5	128.4	53.2	53.4	53.3	14.4057	115	111	108	113	111.5	109.5	73	66	64	69.5	68.5	65	87	88	84	116
726	KM	M	1	GABRIELLA	6	1	KAMPEMBA	2005-10-10	3800	0	0	0	0		2		0	0	2014-04-28	8	8.9	3	24	28	28	28	133.6	133.6	133.6	58.7	58.7	58.7	15.6872	98	101	95	99.5	96.5	98	67	51	58	59	62.5	54.5	80	65	74	57
727	KK	M	1	GABRIELLA	6	1	KAMPEMBA	2004-04-24	2000	0	0	0	0		2		0	0	2014-04-28	10	10	3	24	25.7	25.7	25.7	123.8	123.8	123.8	53.3	53.3	53.3	16.7684	104	96	104	100	104	100	63	67	61	65	62	64	78	77	85	83
728	MS	F	0	GABRIELLA	6	1	KAMPEMBA	2005-11-29	2500	0	0	0	0		2		0	0	2014-04-28	8	8.8	3	25	23.7	23.7	23.7	124.2	124.2	124.2	54.1	54.1	54.1	15.364	93	118	118	105.5	105.5	118	73	73	83	73	78	78	79	95	100	86
729	MM	F	0	GABRIELLA	6	1	KAMPEMBA	2005-02-10	3000	0	0	0	0		2		0	0	2014-04-28	9	9.1	3	24	28.2	28.2	28.2	131.5	131.5	131.5	59.1	59.1	59.1	16.3079	116	112	99	114	107.5	105.5	78	69	64	73.5	71	66.5	87	79	74	86
730	MM	M	1	GABRIELLA	6	1	KAMPEMBA	2006-09-12	3500	0	0	0	0		2		0	0	2014-04-28	7	7.9	3	27	25.1	25.1	25.1	129.1	129.3	129.2	53	53.3	53.15	15.0366	106	98	94	102	100	96	62	64	62	63	62	63	80	78	72	79
731	MN	M	1	GABRIELLA	6	1	KAMPEMBA	2005-06-06	3650	0	0	0	0		2		0	0	2014-04-28	8	9	3	27	26.2	26.2	26.2	131.6	131.8	131.7	56.2	56.4	56.3	15.1053	114	122	120	118	117	121	69	72	66	70.5	67.5	69	86	88	83	105
732	TB	F	0	GABRIELLA	7	1	KAMPEMBA	2004-11-02	2600	0	0	0	0		2		0	0	2014-04-24	9	9.9	3	27	30.1	30.1	30.1	139.3	139.3	139.3	58.7	58.7	58.7	15.5119	115	112	109	113.5	112	110.5	66	74	62	70	64	68	83	84	79	102
733	HM	M	1	GABRIELLA	6	0	KAMPEMBA	2005-03-10	3000	0	0	0	0		2		0	0	2014-04-28	9	9.1	3	26	26.7	26.7	26.7	129.5	129.5	129.5	56.7	56.7	56.7	15.9211	102	106	104	104	103	105	67	68	64	67.5	65.5	66	80	84	81	83
734	KD	M	1	GABRIELLA	5	1	KAMPEMBA	2007-03-25	4000	0	0	0	0		2		0	0	2014-04-28	7	7	3	27	34.3	34.3	34.3	143.7	143.7	143.7	59.5	59.5	59.5	16.6104	88	94	97	91	92.5	95.5	72	70	64	71	68	67	78	78	77	84
735	KG	F	0	GABRIELLA	6	1	KAMPEMBA	2005-07-09	3200	0	0	0	0		2		0	1	2014-04-28	8	9	3	26	28	28	28	131.1	131.1	131.1	57.5	57.5	57.5	16.2912	102	97	98	99.5	100	97.5	69	66	65	67.5	67	65.5	81	77	79	75
736	BL	F	0	GABRIELLA	6	1	KAMPEMBA	2003-12-18	#NULL!	0	0	0	0		2		0	0	2014-04-28	10	10.8	3	25	20.8	20.8	20.8	114.7	114.7	114.7	53	53	53	15.8102	103	94	97	98.5	100	95.5	68	58	60	63	64	59	82	73	79	78
740	OK	F	0	GABRIELLA	3	1	KAMPEMBA	2006-08-03	3800	0	0	0	0		2		0	0	2014-05-02	7	7.9	3	26	16.8	16.8	16.8	106	106.3	106.15	52.2	52.5	52.35	14.9097	88	89	89	88.5	88.5	89	59	66	67	62.5	63	66.5	70	73	74	92
741	MK	F	0	GABRIELLA	3	1	KAMPEMBA	2009-03-16	#NULL!	0	0	0	0		2		0	0	2014-05-02	5	5	2	28	15.9	15.9	15.9	106.3	106	106.15	50.1	50	50.05	14.111	90	89	85	89.5	87.5	87	50	56	56	53	53	56	66	67	64	108
742	KK	M	1	GABRIELLA	3	1	KAMPEMBA	2008-12-19	3200	0	0	0	0		2		0	0	2014-05-02	5	5.7	2	28	16.1	16.1	16.1	108.7	108.4	108.55	47.2	47.5	47.35	13.6636	102	87	90	94.5	96	88.5	76	60	50	68	63	55	81	67	66	103
743	KN	M	1	GABRIELLA	2	1	KAMPEMBA	2009-11-06	3200	0	0	0	0		2		0	0	2014-05-02	4	4.8	2	27	19.8	19.8	19.8	112.3	112.5	112.4	52.5	52.3	52.4	15.6723	111	100	98	105.5	104.5	99	53	62	58	57.5	55.5	60	61	67	80	95
744	MK	M	1	GABRIELLA	2	1	KAMPEMBA	2009-10-03	3500	0	0	0	0		2		0	0	2014-05-02	4	4.8	2	27	17.1	17.1	17.1	108.5	108.3	108.4	52.7	52.5	52.6	14.5525	98	98	102	98	100	100	58	50	70	54	64	60	71	77	79	99
745	ME	F	0	GABRIELLA	1	1	KAMPEMBA	2010-07-24	2800	0	0	0	0		2		0	0	2014-05-02	3	3.9	2	27	13.8	13.8	13.8	102.5	102.5	102.5	50.1	50.1	50.1	13.135	101	99	97	100	99	98	74	71	69	72.5	71.5	70	90	79	78	130
746	IO	F	0	GABRIELLA	1	1	KAMPEMBA	2010-04-26	5900	0	0	0	0		2		0	0	2014-05-02	4	4	2	28	17.4	17.4	17.4	103.2	103.4	103.3	52.1	52.3	52.2	16.306	93	92	95	92.5	94	93.5	62	55	60	58.5	61	57.5	77	75	72	90
747	ET	F	0	GABRIELLA	1	1	KAMPEMBA	2010-07-02	#NULL!	0	0	0	0		2		0	0	2014-05-02	3	3.9	2	28	14.1	14.1	14.1	104.1	104.1	104.1	50.2	50	50.1	13.0112	92	99	96	95.5	94	97.5	64	57	70	60.5	67	63.5	78	72	79	97
748	SN	F	0	GABRIELLA	2	1	KAMPEMBA	2010-03-17	#NULL!	0	0	0	0		2		0	0	2014-05-20	4	4.1	2	26	13.4	13.4	13.4	99.2	99	99.1	46.1	46.3	46.2	13.6445	123	108	102	115.5	112.5	105	66	70	70	68	68	70	94	84	108	110
749	KW	M	1	GABRIELLA	2	1	KAMPEMBA	2010-06-18	3200	0	0	0	0		2		0	0	2014-05-02	3	3.9	2	28	17.9	17.9	17.9	103	103	103	51.2	51.2	51.2	16.8725	93	94	93	93.5	93	93.5	66	66	72	66	69	69	77	78	80	105
750	MM	M	1	GABRIELLA	2	1	KAMPEMBA	2009-07-06	2750	0	0	0	0		2		0	0	2014-05-02	4	4.9	2	27	13.4	13.4	13.4	100.5	100.3	100.4	44.2	44.4	44.3	13.2934	74	73	76	73.5	75	74.5	54	51	52	52.5	53	51.5	62	59	58	91
751	ME	M	1	GABRIELLA	2	1	KAMPEMBA	2010-02-12	3400	0	0	0	0		2		1	0	2014-05-02	4	4.1	2	27	17.9	17.9	17.9	109.8	109.6	109.7	53.1	53.4	53.25	14.8744	101	93	99	97	100	96	53	58	59	55.5	56	58.5	68	74	70	89
752	KT	F	0	GABRIELLA	3	1	KAMPEMBA	2008-10-12	3000	0	0	0	0		2		0	0	2014-05-02	5	5.8	2	27	21.5	21.5	21.5	118.5	118.2	118.35	52.2	52.3	52.25	15.3498	105	99	105	102	105	102	63	64	62	63.5	62.5	63	82	74	83	102
753	OM	F	0	GABRIELLA	4	1	KAMPEMBA	2008-03-07	3900	0	0	0	0		2		0	0	2014-05-02	6	6	2	27	16.9	16.9	16.9	106.1	106.3	106.2	51.3	51	51.15	14.9843	119	115	110	117	114.5	112.5	58	67	72	62.5	65	69.5	93	90	83	77
754	KK	F	0	GABRIELLA	5	1	KAMPEMBA	2006-04-17	#NULL!	0	0	0	0		2		0	0	2014-04-29	8	8	3	24	23.1	23.1	23.1	126.1	126.3	126.2	49.7	49.7	49.7	14.5042	100	102	112	101	106	107	69	64	68	66.5	68.5	66	83	82	83	103
755	KN	M	1	GABRIELLA	5	1	KAMPEMBA	2005-12-30	3100	0	0	0	0		2		0	0	2014-04-29	8	8.8	3	23	22.8	22.9	22.85	124.5	124.7	124.6	51.5	51.7	51.6	14.718	116	92	94	104	105	93	47	56	54	51.5	50.5	55	71	75	70	93
756	KM	F	0	ZAWADI BORA	11	1	KAMPEMBA	2001-01-07	3500	0	0	0	0		2		0	0	2014-04-28	13	13.1	4	23	46.5	46.5	46.5	166.5	166.6	166.55	66.5	66.7	66.6	16.7635	111	107	101	109	106	104	62	57	61	59.5	61.5	59	86	77	78	83
757	TK	F	0	ZAWADI BORA	11	1	KAMPEMBA	1999-06-28	4500	0	0	0	0		2		0	0	2014-03-28	14	14.9	5	23	51.4	51.4	51.4	172.1	172.3	172.2	69.2	69.3	69.25	17.3339	107	102	101	104.5	104	101.5	53	52	50	52.5	51.5	51	73	74	72	62
758	BM	F	0	ZAWADI BORA	11	1	KAMPEMBA	2000-12-26	3000	0	0	0	0		2		0	0	2014-03-28	13	13.7	4	24	35.2	35.2	35.2	147.5	147.6	147.55	66	66.2	66.1	16.1683	118	118	111	118	114.5	114.5	80	83	79	81.5	79.5	81	97	100	91	98
759	NN	F	0	ZAWADI BORA	11	1	KAMPEMBA	1999-02-18	#NULL!	0	0	0	0		2		0	0	2014-03-28	15	15.1	5	24	53.2	53.2	53.2	169	169	169	77.1	77.2	77.15	18.6268	131	110	109	120.5	120	109.5	55	70	65	62.5	60	67.5	91	89	90	87
760	KJ	M	1	ZAWADI BORA	11	1	KAMPEMBA	1999-03-05	4000	0	0	0	0		2		0	0	2014-03-28	15	15.1	5	26	53.2	53	53.1	159.3	159.3	159.3	76.1	76.3	76.2	20.9249	101	103	102	102	101.5	102.5	67	65	66	66	66.5	65.5	87	83	80	77
761	KK	M	1	ZAWADI BORA	11	1	KAMPEMBA	2000-11-30	3000	0	0	0	0		2		0	0	2014-03-28	13	13.8	4	26	32.3	32.3	32.3	139	139	139	62.5	62.3	62.4	16.7176	116	108	119	112	117.5	113.5	74	79	70	76.5	72	74.5	90	92	95	72
762	BN	F	0	ZAWADI BORA	11	1	KAMPEMBA	2001-04-13	2800	0	0	0	0		2		0	0	2014-03-28	12	13	4	27	31.7	31.7	31.7	167.2	167.3	167.25	70.2	70.3	70.25	11.3325	141	141	143	141	142	142	64	77	96	70.5	80	86.5	95	100	106	122
763	MM	M	1	ZAWADI BORA	11	1	KAMPEMBA	2000-01-18	2500	0	0	0	0		2		0	0	2014-03-28	14	14.1	5	27	41.8	41.8	41.8	166.5	166.6	166.55	66.2	66.3	66.25	15.0691	99	98	100	98.5	99.5	99	61	54	51	57.5	56	52.5	77	71	72	73
764	MM	M	1	ZAWADI BORA	11	1	KAMPEMBA	1997-07-27	4000	0	0	0	0		2		0	0	2014-03-28	16	16.9	5	27	42.3	42.3	42.3	163.2	163.5	163.35	67.3	67.5	67.4	15.8527	121	117	112	119	116.5	114.5	72	68	59	70	65.5	63.5	88	86	81	75
765	MA	F	0	ZAWADI BORA	11	1	KAMPEMBA	1999-11-25	4000	0	0	0	0		2		0	1	2014-03-28	14	14.8	5	27	46.1	46.1	46.1	157	156.9	156.95	69	69.1	69.05	18.7145	116	111	110	113.5	113	110.5	72	79	74	75.5	73	76.5	88	89	88	65
766	LT	M	1	ZAWADI BORA	11	1	KAMPEMBA	2000-01-01	#NULL!	0	0	0	0		2		0	0	2014-03-28	14	14.1	5	27	39.3	39.3	39.3	161.7	161.9	161.8	62	62.1	62.05	15.0119	101	97	93	99	97	95	68	63	59	65.5	63.5	61	79	76	74	76
767	MT	M	1	ZAWADI BORA	11	1	KAMPEMBA	2001-11-30	2150	0	0	0	0		2		1	0	2014-03-28	12	12.8	4	27	28.6	28.6	28.6	145.2	145.3	145.25	60.1	60.3	60.2	13.5561	101	95	94	98	97.5	94.5	55	50	50	52.5	52.5	50	71	72	68	99
768	KK	M	1	ZAWADI BORA	11	1	KAMPEMBA	1998-07-23	3500	0	0	0	0		2		0	0	2014-03-28	15	15.9	5	28	44.9	45	44.95	169.4	169.6	169.5	67.5	67.4	67.45	15.6455	127	125	125	126	126	125	79	80	73	79.5	76	76.5	99	95	96	73
769	TM	M	1	ZAWADI BORA	11	1	KAMPEMBA	2000-05-18	#NULL!	0	0	0	0		2		0	0	2014-03-28	13	14	5	28	53.4	53.4	53.4	174.3	174.5	174.4	68.7	68.8	68.75	17.5569	139	136	132	137.5	135.5	134	81	84	75	82.5	78	79.5	105	104	100	106
771	LM	M	1	ZAWADI BORA	11	1	KAMPEMBA	1998-07-27	#NULL!	0	0	0	0		2		0	0	2014-03-28	15	15.9	5	28	36.2	36.2	36.2	150.3	150.1	150.2	66.1	66.3	66.2	16.0461	101	95	93	98	97	94	65	68	64	66.5	64.5	66	80	79	75	84
772	MK	M	1	ZAWADI BORA	11	1	KAMPEMBA	1999-02-28	#NULL!	0	0	0	0		2		0	0	2014-03-28	15	15	5	28	50.1	50.1	50.1	172.9	172.9	172.9	70.5	70.4	70.45	16.759	128	148	138	138	133	143	68	90	70	79	69	80	88	101	97	77
773	KF	M	1	ZAWADI BORA	11	1	KAMPEMBA	1997-05-17	#NULL!	0	0	0	0		2		0	0	2014-03-28	16	17	5	28	65.7	65.71	65.705	170.9	170.7	170.8	77.2	77.1	77.15	22.5228	130	137	120	133.5	125	128.5	60	59	58	59.5	59	58.5	83	89	84	63
774	AS	F	0	ZAWADI BORA	11	1	KAMPEMBA	2001-09-14	#NULL!	0	0	0	0		2		0	0	2014-03-28	12	12.9	4	28	48.2	48.2	48.2	160.9	160.7	160.8	68.3	68.2	68.25	18.6412	132	129	138	130.5	135	133.5	69	76	77	72.5	73	76.5	97	97	103	90
775	NT	F	0	ZAWADI BORA	11	1	KAMPEMBA	1997-03-17	3000	0	0	0	0		2		0	1	2014-03-28	17	17	5	28	50.8	50.8	50.8	161.7	161.8	161.75	71.6	71.5	71.55	19.4167	137	127	126	132	131.5	126.5	68	75	73	71.5	70.5	74	94	96	91	79
776	MN	F	0	ZAWADI BORA	11	1	ANNEXE	1998-10-15	#NULL!	0	0	0	0		2		0	0	2014-03-28	15	15.8	5	28	43.3	43.3	43.3	159.1	159.1	159.1	69.4	69.5	69.45	17.106	116	118	116	117	116	117	66	69	72	67.5	69	70.5	86	89	91	78
777	AY	F	0	ZAWADI BORA	11	1	KAMPEMBA	1998-05-12	#NULL!	0	0	0	0		2		0	0	2014-03-28	15	16	5	29	43.7	43.7	43.7	159	159.1	159.05	66.8	66.8	66.8	17.2748	122	120	119	121	120.5	119.5	79	92	80	85.5	79.5	86	98	104	101	108
778	MD	F	0	ZAWADI BORA	11	1	KAMPEMBA	2000-01-21	2900	0	0	0	0		2		0	0	2014-03-28	14	14.1	5	29	58.9	58.9	58.9	166.8	166.7	166.75	74.5	74.6	74.55	21.1828	119	111	109	115	114	110	70	64	58	67	64	61	112	108	89	86
780	MM	F	0	ZAWADI BORA	11	1	KAMPEMBA	1999-04-26	5000	0	0	0	0		2		0	0	2014-03-28	14	15	5	30	41.6	41.6	41.6	155.7	155.6	155.65	66.5	66.6	66.55	17.171	132	123	116	127.5	124	119.5	64	70	65	67	64.5	67.5	85	90	83	76
781	KK	F	0	ZAWADI BORA	11	1	KAMPEMBA	1999-01-14	3400	0	0	0	0		2		0	0	2014-03-28	15	15.1	5	30	48.6	48.6	48.6	175	175.2	175.1	73.6	73.4	73.5	15.8513	131	130	119	130.5	125	124.5	66	50	55	58	60.5	52.5	94	79	89	93
782	BP	M	1	ZAWADI BORA	11	1	KAMPEMBA	1999-05-02	#NULL!	0	0	0	0		2		0	0	2014-03-29	14	15	5	30	44.1	44.1	44.1	160.3	160.2	160.25	71	71.1	71.05	17.1729	147	132	130	139.5	138.5	131	93	77	82	85	87.5	79.5	118	99	99	118
783	MB	M	1	ZAWADI BORA	11	1	KAMPEMBA	1998-08-28	2900	0	0	0	0		2		0	0	2014-03-29	15	15.9	5	30	64.5	64.5	64.5	172.4	172.3	172.35	74.5	74.5	74.5	21.7139	128	118	126	123	127	122	71	65	63	68	67	64	90	86	89	73
784	BM	M	1	ZAWADI BORA	11	1	KAMPEMBA	1999-10-17	#NULL!	0	0	0	0		2		0	0	2014-03-29	14	14.8	5	30	45.4	45.41	45.405	164.7	164.8	164.75	65.9	65.9	65.9	16.7283	154	146	151	150	152.5	148.5	84	96	90	90	87	93	116	112	112	68
785	NN	F	0	ZAWADI BORA	11	1	KAMPEMBA	1999-10-25	#NULL!	0	0	0	0		2		0	0	2014-03-29	14	14.8	5	24	56.2	56.2	56.2	167.4	167.3	167.35	57.7	57.6	57.65	20.0671	124	124	118	124	121	121	69	67	74	68	71.5	70.5	90	91	87	83
786	ML	F	0	ZAWADI BORA	11	1	KAMPEMBA	1999-06-06	3650	0	0	0	0		2		0	0	2014-03-29	14	15	5	30	48.6	48.62	48.61	161.8	161.9	161.85	63.5	63.2	63.35	18.5567	144	139	131	141.5	137.5	135	67	77	72	72	69.5	74.5	103	99	97	93
787	AA	F	0	ZAWADI BORA	11	1	KAMPEMBA	2000-07-05	3800	0	0	0	0		2		0	1	2014-03-29	13	13.9	4	24	47.5	47.5	47.5	168.8	168.7	168.75	70.3	70.4	70.35	16.6804	119	119	120	119	119.5	119.5	81	76	71	78.5	76	73.5	101	98	92	81
788	KN	F	0	ZAWADI BORA	11	1	KAMPEMBA	2000-03-03	#NULL!	0	0	0	0		2		0	0	2014-03-29	14	14.1	5	27	45.2	45.2	45.2	154	154.1	154.05	74.6	74.5	74.55	19.0465	115	125	118	120	116.5	121.5	81	66	66	73.5	73.5	66	97	90	84	79
789	IS	F	0	ZAWADI BORA	11	1	ANNEXE	2000-04-24	#NULL!	0	0	0	0		2		0	0	2014-03-29	13	14	5	27	46	46.1	46.05	162.8	162.7	162.75	64	64	64	17.3855	112	120	115	116	113.5	117.5	72	74	77	73	74.5	75.5	100	93	90	75
790	TM	M	1	ZAWADI BORA	11	1	KAMPEMBA	1999-08-22	3000	0	0	0	0		2		0	0	2014-03-29	14	14.9	5	27	63.2	63.2	63.2	167.4	167.5	167.45	73.4	73.5	73.45	22.5396	133	128	136	130.5	134.5	132	70	61	72	65.5	71	66.5	96	81	95	61
791	OM	F	0	ZAWADI BORA	10	1	KAMPEMBA	2001-06-01	3200	0	0	0	0		2		0	0	2014-03-31	12	13	4	27	44.7	44.7	44.7	157	157.1	157.05	66.4	66.3	66.35	18.1231	126	120	122	123	124	121	69	79	74	74	71.5	76.5	93	92	94	86
792	NS	F	0	ZAWADI BORA	11	1	KAMPEMBA	1999-08-29	#NULL!	0	0	0	0		2		0	0	2014-03-29	14	14.8	5	27	52.3	52.3	52.3	155.2	155.3	155.25	71.5	71.6	71.55	21.6989	121	126	130	123.5	125.5	128	81	86	85	83.5	83	85.5	103	108	100	99
793	AS	F	0	ZAWADI BORA	11	1	KAMPEMBA	1998-09-25	2000	0	0	0	0		2		0	1	2014-03-29	15	15.8	5	27	48.8	48.8	48.8	163.5	163.4	163.45	63.4	63.3	63.35	18.2663	122	118	107	120	114.5	112.5	66	73	74	69.5	70	73.5	85	91	86	104
794	ML	F	0	ZAWADI BORA	11	1	KAMPEMBA	1998-04-03	3600	0	0	0	0		2		0	1	2014-03-29	15	16	5	27	57.4	57.4	57.4	164.8	164.8	164.8	66.4	66.5	66.45	21.1348	124	112	129	118	126.5	120.5	80	75	71	77.5	75.5	73	97	100	91	76
795	KD	M	1	ZAWADI BORA	11	0	ANNEXE	2000-05-13	3300	0	0	0	0		2		0	0	2014-03-29	13	14	5	27	44.6	44.6	44.6	162.4	162.3	162.35	66.3	66.3	66.3	16.9212	102	113	102	107.5	102	107.5	59	51	55	55	57	53	78	75	68	71
796	MM	F	0	ZAWADI BORA	11	1	KAMPEMBA	1997-04-22	4100	0	0	0	0		2		0	0	2014-03-29	16	17	5	27	52.3	52.3	52.3	162.1	162.2	162.15	77.4	77.4	77.4	19.8915	110	117	124	113.5	117	120.5	80	66	87	73	83.5	76.5	91	84	88	77
797	BM	F	0	ZAWADI BORA	11	1	KAMPEMBA	1997-03-10	2800	0	0	0	0		2		0	0	2014-03-29	17	17.1	5	27	51.7	51.7	51.7	162.2	162.2	162.2	70	70.1	70.05	19.6512	138	128	124	133	131	126	81	75	71	78	76	73	103	97	94	77
798	KM	F	0	ZAWADI BORA	11	1	KAMPEMBA	1998-03-05	3500	0	0	0	0		2		0	0	2014-03-29	16	16.1	5	27	84	84	84	158	158.1	158.05	97	97.1	97.05	33.6272	135	126	132	130.5	133.5	129	89	68	69	78.5	79	68.5	101	86	94	66
804	KT	F	0	ZAWADI BORA	14	1	KAMPEMBA	1997-12-08	2500	0	0	0	0		2		0	0	2014-03-29	16	16.8	5	27	44.3	44.3	44.3	165	165.1	165.05	65.5	65.4	65.45	16.262	111	113	111	112	111	112	75	71	76	73	75.5	73.5	93	86	88	87
805	SM	F	0	ZAWADI BORA	14	1	KAMPEMBA	1996-11-12	#NULL!	0	0	0	0		2		0	0	2014-03-26	17	17.8	5	27	42.3	42.3	42.3	148.4	148.5	148.45	70	70.1	70.05	19.1946	116	112	109	114	112.5	110.5	67	65	60	66	63.5	62.5	86	81	81	69
810	RK	M	1	ZAWADI BORA	11	1	KAMPEMBA	1999-03-17	2750	0	0	0	0		2		0	0	2014-03-29	15	15	5	28	55	55	55	163	163.1	163.05	75	75.1	75.05	20.6881	107	102	111	104.5	109	106.5	65	65	64	65	64.5	64.5	79	79	81	79
812	SJ	F	0	ZAWADI BORA	12	1	KAMPEMBA	1997-08-04	2000	0	0	0	0		2		0	0	2014-03-31	16	16.9	5	23	56.3	56.3	56.3	167.6	167.7	167.65	73.2	73.2	73.2	20.0309	142	138	148	140	145	143	78	86	82	82	80	84	105	104	104	72
813	MT	F	0	ZAWADI BORA	12	1	KAMPEMBA	1999-07-04	#NULL!	0	0	0	0		2		0	0	2014-03-31	14	15	5	23	48.8	48.8	48.8	157.4	157.5	157.45	71.2	71.1	71.15	19.685	115	106	100	110.5	107.5	103	69	65	64	67	66.5	64.5	84	87	76	69
814	SK	F	0	ZAWADI BORA	12	1	KAMPEMBA	1997-10-08	2000	0	0	0	0		2		1	0	2014-03-31	16	16.9	5	23	55.8	55.8	55.8	162.4	162.5	162.45	73.2	73.3	73.25	21.1444	129	124	123	126.5	126	123.5	71	66	71	68.5	71	68.5	95	85	87	77
815	KP	F	0	ZAWADI BORA	12	1	KAMPEMBA	2000-06-27	2800	0	0	0	0		2		1	0	2014-03-31	13	13.9	4	23	41.9	41.9	41.9	155.4	155.5	155.45	65.3	65.3	65.3	17.3393	152	136	140	144	146	138	91	71	74	81	82.5	72.5	111	112	99	80
816	NC	F	0	ZAWADI BORA	12	1	KAMPEMBA	1998-01-03	2700	0	0	0	0		2		0	0	2014-03-31	16	16.1	5	23	41.9	41.9	41.9	151.2	151.3	151.25	66.8	66.5	66.65	18.3157	117	116	117	116.5	117	116.5	75	69	71	72	73	70	92	90	81	89
817	BK	F	0	ZAWADI BORA	12	1	KAMPEMBA	1998-09-30	3250	0	0	0	0		2		0	0	2014-03-31	15	15.8	5	24	60.1	60.1	60.1	171.8	171.7	171.75	76	76.1	76.05	20.3742	117	113	115	115	116	114	75	74	70	74.5	72.5	72	96	87	85	84
818	IF	M	1	ZAWADI BORA	12	1	KAMPEMBA	1998-02-01	3800	0	0	0	0		2		0	0	2014-03-31	16	16.1	5	24	36.8	36.8	36.8	150.7	150.8	150.75	64	63.9	63.95	16.1932	101	99	95	100	98	97	60	62	62	61	61	62	75	76	73	80
819	NT	F	0	ZAWADI BORA	12	1	KAMPEMBA	1999-07-04	3100	0	0	0	0		2		1	1	2014-03-31	14	15	5	24	50	50	50	164	164.1	164.05	71	71.1	71.05	18.5788	121	124	119	122.5	120	121.5	83	89	79	86	81	84	98	101	94	79
820	KT	M	1	ZAWADI BORA	12	0	KAMPEMBA	2000-02-15	2500	0	0	0	0		2		0	0	2014-03-31	14	14.1	5	24	46.6	46.6	46.6	160	160	160	70.2	70.3	70.25	18.2031	120	120	121	120	120.5	120.5	77	79	72	78	74.5	75.5	95	93	91	66
821	KF	F	0	ZAWADI BORA	12	1	KAMPEMBA	1998-06-23	4800	0	0	0	0		2		0	0	2014-03-31	15	15.9	5	24	46.4	46.4	46.4	159	159	159	65.5	65.6	65.55	18.3537	118	116	104	117	111	110	87	68	64	77.5	75.5	66	103	84	86	102
822	KS	M	1	ZAWADI BORA	12	1	KAMPEMBA	1998-12-06	3000	0	0	0	0		2		0	0	2014-03-31	15	15.8	5	26	44.8	44.9	44.85	161.5	161.4	161.45	66.5	66.5	66.5	17.2063	113	109	113	111	113	111	66	71	66	68.5	66	68.5	82	80	81	80
823	BK	F	0	ZAWADI BORA	12	1	KAMPEMBA	1998-06-03	4700	0	0	0	0		2		0	0	2014-03-31	15	16	5	27	54.8	54.8	54.8	162.5	162.6	162.55	76.2	76.3	76.25	20.7399	120	121	109	120.5	114.5	115	85	67	71	76	78	69	96	92	94	75
824	KM	M	1	ZAWADI BORA	12	1	KAMPEMBA	1996-09-09	3000	0	0	0	0		2		0	0	2014-03-31	17	17.9	5	27	50.5	50.5	50.5	166.2	166.3	166.25	72.5	72.6	72.55	18.2712	136	139	128	137.5	132	133.5	83	73	86	78	84.5	79.5	101	101	102	90
825	KK	M	1	ZAWADI BORA	12	1	KAMPEMBA	1996-12-30	#NULL!	0	0	0	0		2		0	0	2014-03-31	17	17.7	5	26	60.4	60.4	60.4	168.8	168.7	168.75	73.3	73.4	73.35	21.2104	125	125	135	125	130	130	66	62	69	64	67.5	65.5	92	86	102	49
826	MN	M	1	ZAWADI BORA	12	1	KAMPEMBA	1997-03-15	#NULL!	0	0	0	0		2		0	0	2014-03-31	17	17	5	26	55.4	55.4	55.4	165.7	165.6	165.65	69.4	69.4	69.4	20.1896	119	126	128	122.5	123.5	127	72	72	67	72	69.5	69.5	90	92	88	58
827	MS	M	1	ZAWADI BORA	10	1	KAMPEMBA	2000-03-10	3300	0	0	0	0		2		0	0	2014-03-31	14	14.1	5	27	34.5	34.5	34.5	154.7	154.8	154.75	63.4	63.5	63.45	14.4065	112	115	113	113.5	112.5	114	59	62	66	60.5	62.5	64	84	85	81	80
828	KM	M	1	ZAWADI BORA	10	1	KAMPEMBA	2001-11-08	2800	0	0	0	0		2		0	0	2014-03-31	12	12.8	4	27	34.3	34.3	34.3	152.2	152.3	152.25	61.9	61.9	61.9	14.7972	114	103	112	108.5	113	107.5	69	61	68	65	68.5	64.5	87	80	91	79
829	MP	F	0	ZAWADI BORA	10	1	KAMPEMBA	1999-08-01	2950	0	0	0	0		2		0	0	2014-03-31	14	14.9	5	28	56.7	56.7	56.7	168.5	168.6	168.55	73.5	73.4	73.45	19.9584	123	122	144	122.5	133.5	133	70	63	61	66.5	65.5	62	92	81	84	73
830	TW	F	0	ZAWADI BORA	10	1	KAMPEMBA	1997-02-01	#NULL!	0	0	0	0		2		0	0	2014-03-31	17	17.1	5	28	46.8	46.8	46.8	153.7	153.7	153.7	72.3	72.4	72.35	19.8106	104	100	107	102	105.5	103.5	69	71	65	70	67	68	86	81	82	90
831	MN	M	1	ZAWADI BORA	10	1	KAMPEMBA	2001-08-05	#NULL!	0	0	0	0		2		0	0	2014-03-31	12	12.9	4	28	40.3	40.3	40.3	155	155.1	155.05	70	70.1	70.05	16.7634	136	117	121	126.5	128.5	119	79	69	66	74	72.5	67.5	96	85	92	108
832	AA	M	1	ZAWADI BORA	10	1	KAMPEMBA	2001-11-25	#NULL!	0	0	0	0		2		0	0	2014-03-31	12	12.8	4	28	42.1	42.1	42.1	146.7	146.7	146.7	61	61.1	61.05	19.5624	125	114	113	119.5	119	113.5	79	76	77	77.5	78	76.5	97	90	92	93
833	KN	M	1	ZAWADI BORA	10	1	KAMPEMBA	2001-05-19	3110	0	0	0	0		2		0	0	2014-03-31	12	13	4	28	55.6	55.6	55.6	152	152.1	152.05	67	67.1	67.05	24.0493	111	110	122	110.5	116.5	116	61	78	70	69.5	65.5	74	77	88	89	87
834	MD	M	1	ZAWADI BORA	10	1	KAMPEMBA	2002-09-09	2700	0	0	0	0		2		0	0	2014-03-31	11	11.9	4	28	34.5	34.5	34.5	148.5	148.6	148.55	64	64.1	64.05	15.6341	109	111	107	110	108	109	67	65	65	66	66	65	85	82	81	96
835	MM	M	1	ZAWADI BORA	10	1	KAMPEMBA	1998-12-30	3800	0	0	0	0		2		0	0	2014-03-31	15	15.7	5	28	49.1	49.1	49.1	159	159.1	159.05	72.3	72.4	72.35	19.4095	141	127	132	134	136.5	129.5	68	69	79	68.5	73.5	74	93	91	95	93
836	AM	F	0	ZAWADI BORA	10	1	KAMPEMBA	2001-01-05	3000	0	0	0	0		2		0	0	2014-03-31	13	13.1	4	29	41.6	41.6	41.6	156	156.1	156.05	70	70.1	70.05	17.0831	107	109	109	108	108	109	69	56	58	62.5	63.5	57	83	81	75	89
837	TK	F	0	ZAWADI BORA	10	1	KAMPEMBA	2001-06-02	4500	0	0	0	0		2		0	0	2014-03-31	12	13	4	29	43.7	43.7	43.7	167.8	167.7	167.75	71	71.1	71.05	15.5295	106	110	120	108	113	115	62	68	87	65	74.5	77.5	89	84	98	100
838	MW	F	0	ZAWADI BORA	10	1	KAMPEMBA	2001-04-16	2250	0	0	0	0		2		0	0	2014-03-31	12	13	4	30	38.2	38.2	38.2	154	154.1	154.05	66.5	66.6	66.55	16.0968	135	121	124	128	129.5	122.5	79	67	51	73	65	59	101	88	75	100
839	KM	F	0	ZAWADI BORA	10	1	KAMPEMBA	2002-02-06	2880	0	0	0	0		2		0	0	2014-03-31	12	12.1	4	30	38.1	38.1	38.1	146.5	146.6	146.55	65.4	65.5	65.45	17.74	114	115	119	114.5	116.5	117	75	70	65	72.5	70	67.5	94	85	90	96
840	OD	F	0	ZAWADI BORA	10	1	KAMPEMBA	2000-06-13	4300	0	0	0	0		2		0	0	2014-03-31	13	14	5	30	53.7	53.7	53.7	159.2	159.3	159.25	70.8	70.7	70.75	21.1746	114	128	126	121	120	127	73	82	80	77.5	76.5	81	103	105	94	81
841	KK	M	1	ZAWADI BORA	10	1	KAMPEMBA	1999-01-01	3800	0	0	0	0		2		0	0	2014-03-31	15	15.1	5	30	45.8	45.8	45.8	160.6	160.5	160.55	67.5	67.6	67.55	17.7683	112	112	118	112	115	115	74	90	93	82	83.5	91.5	97	95	101	114
842	KA	F	0	ZAWADI BORA	10	1	KAMPEMBA	2001-12-21	3200	0	0	0	0		2		1	1	2014-03-31	12	12.8	4	30	58.8	58.8	58.8	147.7	147.7	147.7	64.2	64.3	64.25	26.9536	118	114	118	116	118	116	86	87	79	86.5	82.5	83	107	97	95	99
843	MN	F	0	ZAWADI BORA	10	1	KAMPEMBA	1999-06-12	#NULL!	0	0	0	0		2		0	1	2014-03-31	14	15	5	31	54.2	54.2	54.2	164.6	164.6	164.6	76	76.1	76.05	20.005	105	117	130	111	117.5	123.5	75	58	65	66.5	70	61.5	90	80	92	118
844	KN	F	0	ZAWADI BORA	10	1	KAMPEMBA	2000-12-27	3000	0	0	0	0		2		0	0	2014-03-31	13	13.7	4	31	55.4	55.4	55.4	156.4	156.4	156.4	72.5	72.5	72.5	22.6483	116	120	125	118	120.5	122.5	80	85	72	82.5	76	78.5	99	112	94	123
845	TM	F	0	ZAWADI BORA	10	1	KAMPEMBA	2000-04-01	2400	0	0	0	0		2		0	0	2014-03-31	13	14.1	5	31	57.3	57.3	57.3	156.2	156.3	156.25	77	77.1	77.05	23.4701	149	109	119	129	134	114	66	71	61	68.5	63.5	66	90	86	78	104
846	EA	F	0	ZAWADI BORA	10	1	KAMPEMBA	1999-08-13	3000	0	0	0	0		2		0	1	2014-03-31	14	14.9	5	31	41.6	41.6	41.6	162	162	162	69.2	69.3	69.25	15.8512	113	121	123	117	118	122	79	80	73	79.5	76	76.5	97	106	91	126
847	MN	M	1	ZAWADI BORA	10	1	KAMPEMBA	2001-03-01	#NULL!	0	0	0	0		2		0	0	2014-03-31	13	13.1	4	31	54.9	54.9	54.9	167.4	167.5	167.45	70.8	70.7	70.75	19.5795	126	127	130	126.5	128	128.5	70	70	63	70	66.5	66.5	92	90	86	69
848	AB	M	1	ZAWADI BORA	10	1	KAMPEMBA	2001-08-05	3500	0	0	0	0		2		0	0	2014-03-31	12	12.9	4	30	31.2	31.2	31.2	143.8	143.7	143.75	63.6	63.7	63.65	15.0987	105	101	100	103	102.5	100.5	62	68	59	65	60.5	63.5	77	82	73	103
849	FK	F	0	ZAWADI BORA	10	1	ANNEXE	2001-10-15	3800	0	0	0	0		2		0	0	2014-03-31	12	12.8	4	30	43.8	43.8	43.8	155.2	155.3	155.25	65	65.1	65.05	18.1723	126	112	106	119	116	109	66	69	61	67.5	63.5	65	86	79	80	97
850	NL	F	0	ZAWADI BORA	10	1	KAMPEMBA	2002-01-01	2700	0	0	0	0		2		0	0	2014-03-31	12	12.1	4	30	25.6	25.6	25.6	134.5	134.6	134.55	59.6	59.7	59.65	14.1408	121	112	110	116.5	115.5	111	68	70	68	69	68	69	92	90	90	110
851	MA	F	0	ZAWADI BORA	10	1	KAMPEMBA	2000-06-26	2600	0	0	0	0		2		0	0	2014-03-31	13	13.9	4	30	41.5	41.5	41.5	165.9	165.8	165.85	66	66.1	66.05	15.0875	99	102	106	100.5	102.5	104	69	65	56	67	62.5	60.5	80	78	74	74
852	KM	F	0	ZAWADI BORA	10	1	KAMPEMBA	2002-08-06	2860	0	0	0	0		2		0	0	2014-03-31	11	11.9	4	28	34.5	39.5	37	149.9	149.9	149.9	65.6	65.5	65.55	16.4664	121	114	119	117.5	120	116.5	70	51	61	60.5	65.5	56	89	78	87	84
853	MB	F	0	ZAWADI BORA	10	1	KAMPEMBA	2002-10-30	3500	0	0	0	0		2		0	0	2014-03-31	11	11.8	4	28	42.9	42.9	42.9	155.4	155.4	155.4	67	67.1	67.05	17.7646	123	115	109	119	116	112	77	63	65	70	71	64	96	97	88	115
854	MA	F	0	ZAWADI BORA	10	1	KAMPEMBA	2001-06-30	2500	0	0	0	0		2		0	0	2014-03-31	12	12.9	4	28	35.8	35.8	35.8	152	152	152	66	66.1	66.05	15.4952	100	103	99	101.5	99.5	101	63	66	69	64.5	66	67.5	77	80	81	80
855	TM	F	0	ZAWADI BORA	10	1	KAMPEMBA	2001-12-21	3650	0	0	0	0		2		0	0	2014-04-01	12	12.7	4	27	47.4	47.4	47.4	160.4	160.4	160.4	69.7	69.8	69.75	18.4234	133	132	132	132.5	132.5	132	90	72	61	81	75.5	66.5	108	98	88	99
856	WM	F	0	ZAWADI BORA	10	1	KAMPEMBA	2000-11-16	3200	0	0	0	0		2		0	0	2014-04-01	13	13.7	4	27	50.5	50.5	50.5	162.4	162.4	162.4	73.5	73.5	73.5	19.1478	135	124	130	129.5	132.5	127	90	69	63	79.5	76.5	66	105	91	92	90
857	MK	M	1	ZAWADI BORA	10	1	KAMPEMBA	1998-11-03	2000	0	0	0	0		2		1	1	2014-04-01	15	15.8	5	27	54	54	54	171.5	171.5	171.5	70.5	70.6	70.55	18.3597	101	109	110	105	105.5	109.5	69	62	64	65.5	66.5	63	86	85	84	67
858	NK	F	0	ZAWADI BORA	10	1	KAMPEMBA	1999-05-26	3500	0	0	0	0		2		0	0	2014-04-01	14	14.9	5	27	56	56	56	163.8	163.8	163.8	75	75.1	75.05	20.8718	140	131	123	135.5	131.5	127	70	87	73	78.5	71.5	80	94	87	85	66
859	KJ	M	1	ZAWADI BORA	10	1	KAMPEMBA	2000-05-02	3400	0	0	0	0		2		0	0	2014-04-01	13	14	5	27	45.8	45.8	45.8	161	161.1	161.05	72	72.1	72.05	17.6581	120	120	124	120	122	122	74	77	77	75.5	75.5	77	98	91	97	71
860	NK	F	0	ZAWADI BORA	10	1	KAMPEMBA	1998-05-06	3500	0	0	0	0		2		0	0	2014-04-01	15	16	5	27	52.7	52.7	52.7	156.5	156.6	156.55	79	79.1	79.05	21.5033	109	104	106	106.5	107.5	105	68	57	58	62.5	63	57.5	83	78	78	68
861	NM	F	0	ZAWADI BORA	10	1	KAMPEMBA	2000-12-21	#NULL!	0	0	0	0		2		0	0	2014-04-01	13	13.7	4	27	37.2	37.2	37.2	158.5	158.6	158.55	64	64.1	64.05	14.7983	108	107	103	107.5	105.5	105	52	58	53	55	52.5	55.5	75	78	80	82
862	NK	F	0	ZAWADI BORA	10	1	KAMPEMBA	2000-03-01	#NULL!	0	0	0	0		2		0	0	2014-04-01	14	14	5	27	52.7	52.7	52.7	159.7	159.8	159.75	70.5	70.5	70.5	20.6504	117	123	122	120	119.5	122.5	88	82	85	85	86.5	83.5	104	99	96	108
863	KK	M	1	ZAWADI BORA	10	1	KAMPEMBA	2000-05-05	3000	0	0	0	0		2		0	0	2014-04-01	13	14	5	27	51.3	51.3	51.3	162.4	162.3	162.35	73	73.1	73.05	19.4631	113	119	111	116	112	115	69	58	54	63.5	61.5	56	86	84	75	76
863	MK	M	1	ZAWADI BORA	12	1	KAMPEMBA	1997-03-16	#NULL!	0	0	0	0		2		0	0	2014-04-01	17	17	5	30	54	54	54	173.2	173.3	173.25	70.5	70.6	70.55	17.9907	112	108	109	110	110.5	108.5	53	61	58	57	55.5	59.5	74	77	76	68
866	KM	M	1	ZAWADI BORA	14	1	KAMPEMBA	1997-04-12	3000	0	0	0	0		2		0	0	2014-04-01	16	17	5	30	61.8	61.8	61.8	179	179.1	179.05	73	73.1	73.05	19.277	122	126	129	124	125.5	127.5	76	81	76	78.5	76	78.5	96	100	94	78
867	NE	M	1	ZAWADI BORA	13	1	KAMPEMBA	1999-01-01	#NULL!	0	0	0	0		2		0	0	2014-04-01	15	15.1	5	28	61.8	61.8	61.8	185.2	185.3	185.25	78.5	78.6	78.55	18.0083	107	105	102	106	104.5	103.5	65	61	55	63	60	58	86	80	78	63
885	MN	M	1	ZAWADI BORA	12	1	KAMPEMBA	2000-09-05	3500	0	0	0	0		2		0	1	2014-04-02	13	13.8	4	27	35.6	35.6	35.6	150.5	150.4	150.45	64	64	64	15.7277	108	112	112	110	110	112	72	79	73	75.5	72.5	76	88	93	90	71
888	NK	F	0	ZAWADI BORA	12	1	KAMPEMBA	1998-03-02	5000	0	0	0	0		2		0	0	2014-04-02	16	16	5	27	63.5	63.5	63.5	174.7	174.7	174.7	77.1	77.2	77.15	20.806	144	130	122	137	133	126	69	67	79	68	74	73	99	94	99	69
889	KD	M	1	ZAWADI BORA	12	1	KAMPEMBA	1999-10-26	#NULL!	0	0	0	0		2		0	0	2014-04-02	14	14.8	5	27	51	51	51	166.2	166.3	166.25	71	71.1	71.05	18.4521	103	108	95	105.5	99	101.5	69	66	66	67.5	67.5	66	85	81	81	86
892	BK	M	1	ZAWADI BORA	10	1	KAMPEMBA	1999-04-04	#NULL!	0	0	0	0		2		0	0	2014-04-02	14	15	5	27	53.3	53.3	53.3	168.4	168.5	168.45	71	71.1	71.05	18.7839	103	103	111	103	107	107	71	65	58	68	64.5	61.5	82	78	82	75
893	NM	M	1	ZAWADI BORA	10	1	KAMPEMBA	1999-06-25	#NULL!	0	0	0	0		2		0	0	2014-04-02	14	14.9	5	27	52.2	52.5	52.35	172.7	172.8	172.75	68.3	68.4	68.35	17.5421	145	128	121	136.5	133	124.5	79	71	76	75	77.5	73.5	102	90	93	90
894	KM	M	1	ZAWADI BORA	10	1	KAMPEMBA	2002-02-25	#NULL!	0	0	0	0		2		0	0	2014-04-02	12	12	4	27	33	33	33	141	141.1	141.05	61	61.1	61.05	16.587	119	115	111	117	115	113	73	72	67	72.5	70	69.5	91	89	83	74
895	LN	M	1	ZAWADI BORA	10	1	KAMPEMBA	2000-09-03	#NULL!	0	0	0	0		2		0	0	2014-04-02	13	13.8	4	27	40.2	40.2	40.2	151.8	151.9	151.85	62.4	62.5	62.45	17.434	113	111	110	112	111.5	110.5	67	70	77	68.5	72	73.5	87	88	91	74
896	MK	F	0	ZAWADI BORA	10	1	KAMPEMBA	2000-03-06	3550	0	0	0	0		2		0	0	2014-04-02	14	14	5	27	44.6	44.6	44.6	154	154.1	154.05	66	66.1	66.05	18.7937	127	130	124	128.5	125.5	127	76	70	61	73	68.5	65.5	94	91	88	108
897	KK	F	0	ZAWADI BORA	10	1	KAMPEMBA	2000-07-14	3500	0	0	0	0		2		0	0	2014-04-02	13	13.9	4	27	44.6	44.6	44.6	159	159.1	159.05	68.5	68.6	68.55	17.6306	112	121	109	116.5	110.5	115	51	52	62	51.5	56.5	57	86	76	77	72
898	SK	M	1	ZAWADI BORA	10	1	KAMPEMBA	2002-11-23	#NULL!	0	0	0	0		2		0	0	2014-04-02	11	11.7	4	28	28.7	28.7	28.7	136.8	136.9	136.85	67.3	67.4	67.35	15.3247	97	94	94	95.5	95.5	94	57	60	66	58.5	61.5	63	73	71	77	100
899	MK	M	1	ZAWADI BORA	10	1	KAMPEMBA	2001-08-09	#NULL!	0	0	0	0		2		0	0	2014-04-02	12	12.9	4	28	33	33	33	144.8	144.7	144.75	65.6	65.7	65.65	15.7499	102	109	102	105.5	102	105.5	63	84	70	73.5	66.5	77	84	93	85	78
901	NJ	F	0	ZAWADI BORA	12	1	KAMPEMBA	1998-01-07	#NULL!	0	0	0	0		2		1	1	2014-04-02	16	16.1	5	27	46	46	46	176.6	176.7	176.65	68	68.1	68.05	14.7411	111	116	111	113.5	111	113.5	61	61	66	61	63.5	63.5	87	82	77	73
902	MW	F	0	ZAWADI BORA	11	1	KAMPEMBA	1999-04-13	#NULL!	0	0	0	0		2		0	0	2014-04-02	14	15	5	27	47.3	47.3	47.3	153.4	153.4	153.4	73.2	73.3	73.25	20.1007	123	123	123	123	123	123	82	74	75	78	78.5	74.5	99	92	96	73
903	MM	M	1	ZAWADI BORA	11	1	LUBUMBASHI	1998-01-01	#NULL!	0	0	0	0		2		0	0	2014-04-02	16	16.1	5	28	63.1	63.1	63.1	178.8	178.9	178.85	75.6	75.9	75.75	19.7266	102	115	116	108.5	109	115.5	76	50	70	63	73	60	88	80	90	69
904	VN	F	0	ZAWADI BORA	11	1	KAMPEMBA	2000-04-20	3500	0	0	0	0		2		1	1	2014-04-02	13	14	5	27	41.9	41.9	41.9	164.3	164.4	164.35	61.9	62	61.95	15.5122	119	118	115	118.5	117	116.5	73	75	67	74	70	71	94	93	91	109
905	AI	M	1	ZAWADI BORA	15	1	KAMPEMBA	1996-09-25	#NULL!	0	0	0	0		2		1	0	2014-04-02	17	17.8	5	27	62.3	62.3	62.3	177.8	177.9	177.85	77.5	77.6	77.55	19.6961	103	109	109	106	106	109	71	60	66	65.5	68.5	63	82	81	78	70
906	NB	M	1	ZAWADI BORA	14	1	KAMPEMBA	1998-10-27	#NULL!	0	0	0	0		2		0	1	2014-04-02	15	15.8	5	27	58.5	58.5	58.5	176	176.1	176.05	73.2	73.3	73.25	18.8749	98	116	106	107	102	111	67	67	70	67	68.5	68.5	81	83	84	71
907	NG	M	1	ZAWADI BORA	10	1	KAMPEMBA	2002-08-05	3400	0	0	0	0		2		0	0	2014-04-03	11	11.9	4	26	39.3	39.3	39.3	147.4	147.5	147.45	67.2	67.3	67.25	18.076	107	97	104	102	105.5	100.5	62	61	56	61.5	59	58.5	80	80	73	78
908	MK	M	1	ZAWADI BORA	10	1	KAMPEMBA	2000-10-11	4000	0	0	0	0		2		0	0	2014-04-03	13	13.8	4	27	44.7	44.7	44.7	160.1	160	160.05	73.2	73.3	73.25	17.45	108	110	112	109	110	111	62	65	68	63.5	65	66.5	89	87	85	90
910	MP	M	1	ZAWADI BORA	12	1	KAMPEMBA	1998-08-18	3000	0	0	0	0		2		0	0	2014-04-03	15	15.8	5	27	62	62	62	174	174.1	174.05	77.6	77.7	77.65	20.4665	119	124	110	121.5	114.5	117	61	62	53	61.5	57	57.5	85	86	73	56
911	UK	M	1	ZAWADI BORA	11	1	KAMPEMBA	1999-02-10	3500	0	0	0	0		2		0	0	2014-04-03	15	15	5	27	48.5	48.5	48.5	167.6	167.7	167.65	73.6	73.7	73.65	17.2558	119	128	132	123.5	125.5	130	86	72	68	79	77	70	100	94	92	80
912	MB	M	1	ZAWADI BORA	12	1	KAMPEMBA	1999-02-18	3700	0	0	0	0		2		0	0	2014-04-03	15	15	5	27	43	43	43	136.4	136.5	136.45	68.9	69	68.95	23.0952	104	104	97	104	100.5	100.5	66	63	61	64.5	63.5	62	82	79	76	75
913	UR	F	0	ZAWADI BORA	10	1	KAMPEMBA	2000-03-18	3500	0	0	0	0		2		0	0	2014-04-03	14	14	5	27	51	51	51	160.8	160.9	160.85	76.3	76.4	76.35	19.7119	143	127	128	135	135.5	127.5	88	91	85	89.5	86.5	88	109	98	99	73
914	MT	F	0	ZAWADI BORA	10	1	KAMPEMBA	2001-08-28	3300	0	0	0	0		2		0	0	2014-04-03	12	12.8	4	35	35.7	35.7	35.7	157.7	157.8	157.75	66.7	66.8	66.75	14.346	101	105	107	103	104	106	68	58	61	63	64.5	59.5	83	80	76	76
915	SE	M	1	ZAWADI BORA	10	1	KAMPEMBA	2002-01-01	3200	0	0	0	0		2		1	0	2014-04-03	12	12.1	4	27	38.4	38.4	38.4	153.2	153.3	153.25	69.9	70	69.95	16.3505	115	109	112	112	113.5	110.5	72	72	72	72	72	72	91	87	87	66
916	KK	F	0	ZAWADI BORA	12	1	KAMPEMBA	1999-09-29	3200	0	0	0	0		2		0	0	2014-04-03	14	14.8	5	28	40.6	40.6	40.6	151.2	151.3	151.25	70.3	70.4	70.35	17.7474	98	112	105	105	101.5	108.5	70	61	50	65.5	60	55.5	81	81	75	63
917	KM	M	1	ZAWADI BORA	10	1	KAMPEMBA	1997-01-01	3400	0	0	0	0		2		0	1	2014-04-03	17	17.1	5	28	53.8	53.8	53.8	171.9	171	171.45	73.9	74	73.95	18.3024	113	120	117	116.5	115	118.5	72	79	73	75.5	72.5	76	93	92	92	64
918	MK	F	0	ZAWADI BORA	14	1	KAMPEMBA	1998-02-12	2700	0	0	0	0		2		0	0	2014-04-03	16	16	5	28	63.2	63.2	63.2	160.1	160.2	160.15	92.4	92.5	92.45	24.6413	110	98	97	104	103.5	97.5	62	69	63	65.5	62.5	66	79	73	77	78
919	KM	M	1	ZAWADI BORA	10	1	KAMPEMBA	2000-08-13	3000	0	0	0	0		2		0	1	2014-04-03	13	13.9	4	28	32.5	32.5	32.5	140.9	141	140.95	63.7	63.8	63.75	16.3589	113	116	114	114.5	113.5	115	63	81	61	72	62	71	81	90	84	62
920	OM	F	0	ZAWADI BORA	11	1	KAMPEMBA	1998-01-25	3400	0	0	0	0		2		1	1	2014-04-03	16	16	5	28	39	39	39	149.4	149.5	149.45	68.4	68.5	68.45	17.4611	111	103	109	107	110	106	74	73	72	73.5	73	72.5	88	84	85	84
921	MJ	M	1	ZAWADI BORA	10	1	KAMPEMBA	2000-09-08	3600	0	0	0	0		2		0	1	2014-04-03	13	13.8	4	28	33.3	33.3	33.3	145.4	145.5	145.45	60.9	61	60.95	15.7404	97	96	96	96.5	96.5	96	63	46	56	54.5	59.5	51	78	71	74	64
922	KK	F	0	ZAWADI BORA	11	1	KAMPEMBA	1999-04-12	3700	0	0	0	0		2		1	1	2014-04-08	14	15	5	28	51.4	51.4	51.4	172.5	172.6	172.55	68	68.1	68.05	17.2637	119	124	113	121.5	116	118.5	54	45	86	49.5	70	65.5	80	94	101	71
927	ES	F	0	ZAWADI BORA	14	1	KAMPEMBA	1997-04-16	2300	0	0	0	0		2		0	1	2014-04-03	16	17	5	30	50	50	50	163	163.1	163.05	64	64.1	64.05	18.8074	108	123	104	115.5	106	113.5	70	62	59	66	64.5	60.5	83	85	75	76
928	KK	M	1	ZAWADI BORA	14	1	KAMPEMBA	1997-07-17	3100	0	0	0	0		2		0	0	2014-04-03	16	16.9	5	30	61.7	61.7	61.7	173.5	173.6	173.55	76.4	76.5	76.45	20.485	124	130	126	127	125	128	72	72	67	72	69.5	69.5	96	95	90	93
931	MK	F	0	ZAWADI BORA	13	1	KAMPEMBA	1997-01-29	3000	0	0	0	0		2		1	0	2014-04-04	17	17	5	27	53.1	53.1	53.1	164.1	164	164.05	79	79.1	79.05	19.7307	110	120	119	115	114.5	119.5	64	70	69	67	66.5	69.5	92	93	90	67
932	MM	F	0	ZAWADI BORA	13	1	KAMPEMBA	1997-05-08	3500	0	0	0	0		2		0	0	2014-04-04	16	17	5	27	41.5	41.5	41.5	152.5	152.6	152.55	66	66.1	66.05	17.833	115	116	113	115.5	114	114.5	74	78	65	76	69.5	71.5	89	90	84	84
937	BK	F	0	ZAWADI BORA	14	1	KAMPEMBA	1996-12-21	2300	0	0	0	0		2		0	0	2014-04-04	17	17.7	5	27	47.5	47.5	47.5	161.5	161.6	161.55	62	62.6	62.3	18.2003	108	115	112	111.5	110	113.5	65	75	66	70	65.5	70.5	83	88	83	63
941	SK	F	0	ZAWADI BORA	11	1	KAMPEMBA	2000-06-28	#NULL!	0	0	0	0		2		0	0	2014-04-02	13	13.9	4	28	52.1	52.1	52.1	161.8	161.9	161.85	74	74.1	74.05	19.889	117	112	107	114.5	112	109.5	71	66	50	68.5	60.5	58	90	89	78	96
942	NM	M	1	ZAWADI BORA	13	1	KAMPEMBA	1999-12-12	2000	0	0	0	0		2		0	0	2014-04-04	14	14.7	5	28	46.5	46.5	46.5	151.7	151.8	151.75	67	67.1	67.05	20.1928	127	119	116	123	121.5	117.5	73	65	69	69	71	67	94	85	90	91
944	NK	F	0	ZAWADI BORA	10	1	KAMPEMBA	2000-02-22	3700	0	0	0	0		2		0	0	2014-04-04	14	14	5	28	43.2	43.2	43.2	155.5	155.6	155.55	67	67.1	67.05	17.8543	123	132	124	127.5	123.5	128	75	73	59	74	67	66	101	93	89	91
946	KM	M	1	ZAWADI BORA	13	1	KAMPEMBA	1997-11-06	3000	0	0	0	0		2		0	0	2014-04-04	16	16.8	5	28	72.5	72.5	72.5	178.5	178.6	178.55	84.5	84.4	84.45	22.7415	143	156	134	149.5	138.5	145	77	69	94	73	85.5	81.5	100	96	94	74
949	UD	M	1	ZAWADI BORA	12	1	KAMPEMBA	1999-10-26	3500	0	0	0	0		2		0	0	2014-04-04	14	14.8	5	30	40.1	40.1	40.1	153.3	153.4	153.35	64	64.1	64.05	17.0521	120	125	121	122.5	120.5	123	65	62	60	63.5	62.5	61	90	78	81	79
951	KK	M	1	ZAWADI BORA	13	1	KAMPEMBA	1998-05-16	2000	0	0	0	0		2		0	1	2014-04-04	15	15.9	5	30	48.5	48.5	48.5	163	163.1	163.05	67	67.1	67.05	18.2432	114	134	114	124	114	124	71	70	68	70.5	69.5	69	91	89	85	65
954	DE	M	1	ZAWADI BORA	10	1	KAMPEMBA	2002-12-02	2600	0	0	0	0		2		1	1	2014-04-04	11	11.8	4	31	57.2	57.2	57.2	171.4	171.5	171.45	87.5	87.5	87.5	19.459	115	114	121	114.5	118	117.5	61	59	41	60	51	50	84	80	77	58
955	KN	F	0	ZAWADI BORA	10	1	KAMPEMBA	2002-10-07	3000	0	0	0	0		2		0	1	2014-04-04	11	11.8	4	30	33.7	33.7	33.7	143	143.1	143.05	60.5	60.6	60.55	16.4685	122	129	121	125.5	121.5	125	85	70	78	77.5	81.5	74	100	98	94	112
956	MW	M	1	ZAWADI BORA	12	1	KAMPEMBA	1997-09-27	2900	0	0	0	0		2		0	1	2014-04-04	16	16.8	5	30	49.9	49.9	49.9	167.7	167.8	167.75	73	73.1	73.05	17.7327	103	113	112	108	107.5	112.5	71	73	73	72	72	73	83	89	91	73
959	NM	F	0	ZAWADI BORA	14	1	KAMPEMBA	1996-12-30	1400	0	0	0	0		2		0	0	2014-04-05	17	17.7	5	27	54	54	54	169.7	169.8	169.75	79	79.1	79.05	18.7402	100	98	102	99	101	100	59	60	54	59.5	56.5	57	77	77	72	78
960	KK	F	0	ZAWADI BORA	10	1	KAMPEMBA	2001-02-01	3800	0	0	0	0		2		0	0	2014-04-05	13	13.1	4	27	51.4	51.4	51.4	159.3	159.4	159.35	74	74.1	74.05	20.2423	117	117	110	117	113.5	113.5	76	69	69	72.5	72.5	69	91	85	83	71
961	NS	M	1	ZAWADI BORA	10	1	KAMPEMBA	2001-04-04	3200	0	0	0	0		2		0	0	2014-04-05	13	13	4	27	51.4	51.4	51.4	166	166.1	166.05	75	75.1	75.05	18.6417	121	112	109	116.5	115	110.5	69	73	62	71	65.5	67.5	94	88	81	89
962	KK	M	1	ZAWADI BORA	10	1	KAMPEMBA	2001-04-02	1800	0	0	0	0		2		0	0	2014-04-05	13	13	4	27	42.9	42.9	42.9	157.4	157.5	157.45	71.9	72	71.95	17.305	120	130	125	125	122.5	127.5	79	80	69	79.5	74	74.5	98	94	90	87
966	KE	F	0	ZAWADI BORA	13	1	KAMPEMBA	1996-11-26	4000	0	0	0	0		2		0	1	2014-04-05	17	17.7	5	27	79.6	79.6	79.6	171.8	171.9	171.85	96.4	96.5	96.45	26.9534	113	122	124	117.5	118.5	123	72	67	63	69.5	67.5	65	91	85	87	80
968	BK	F	0	ZAWADI BORA	13	1	KAMPEMBA	1998-11-27	2600	0	0	0	0		2		0	0	2014-04-05	15	15.7	5	27	51.6	51.6	51.6	160.2	160.3	160.25	79.5	79.6	79.55	20.0934	111	107	98	109	104.5	102.5	66	72	58	69	62	65	85	85	83	90
969	KK	M	1	ZAWADI BORA	10	1	KAMPEMBA	2000-04-03	1800	0	0	0	0		2		0	0	2014-04-05	14	14	5	27	32.3	32.3	32.3	146.4	146.5	146.45	60.5	60.6	60.55	15.06	102	103	101	102.5	101.5	102	55	58	56	56.5	55.5	57	73	74	61	67
974	BA	F	0	ZAWADI BORA	10	1	KAMPEMBA	2001-04-17	2100	0	0	0	0		2		1	0	2014-04-05	12	13	4	28	43.3	43.33	43.315	166	166	166	56.5	56.5	56.5	15.7189	94	104	102	99	98	103	52	75	73	63.5	62.5	74	87	86	84	97
975	Zx	F	0	ZAWADI BORA	14	1	KAMPEMBA	1997-07-06	2000	0	0	0	0		2		1	0	2014-04-05	16	16.9	5	29	53.5	53.5	53.5	145.5	145.6	145.55	84	83.9	83.95	25.254	105	96	94	100.5	99.5	95	67	66	70	66.5	68.5	68	79	77	80	86
977	TM	F	0	ZAWADI BORA	15	1	KAMPEMBA	1998-02-13	2500	0	0	0	0		2		0	0	2014-04-05	16	16	5	30	55.4	55.4	55.4	156.2	156.3	156.25	74.2	74.2	74.2	22.6918	127	138	127	132.5	127	132.5	90	91	78	90.5	84	84.5	104	106	95	91
979	SD	M	1	ZAWADI BORA	15	1	KAMPEMBA	1998-08-04	2400	0	0	0	0		2		1	1	2014-04-05	15	15.9	5	29	54.1	54.1	54.1	166.5	166.5	166.5	71.2	71.3	71.25	19.515	118	114	113	116	115.5	113.5	80	76	74	78	77	75	100	89	90	52
984	MK	F	0	LE GERMOIR	10	1	RUASHI	2002-03-19	3200	0	0	0	0		2		0	0	2014-03-31	12	12	4	27	38.1	38.2	38.15	148.1	148.2	148.15	61.5	61.3	61.4	17.3817	124	113	108	118.5	116	110.5	84	64	74	74	79	69	103	87	93	73
985	LE	M	1	LE GERMOIR	10	1	ANNEXE	1999-12-01	3500	0	0	0	0		2		0	0	2014-03-31	14	14.8	5	25	46.7	46.6	46.65	166.1	166	166.05	66.1	66	66.05	16.919	121	103	101	112	111	102	73	56	65	64.5	69	60.5	94	78	81	75
986	ND	M	1	LE GERMOIR	10	1	RUASHI	2000-09-01	2800	0	0	0	0		2		0	0	2014-03-31	13	13.9	4	27	43.7	43.7	43.7	158.2	158.1	158.15	65	65	65	17.472	101	105	111	103	106	108	67	66	63	66.5	65	64.5	79	77	76	61
987	KM	F	0	LE GERMOIR	10	1	RUASHI	2002-10-23	#NULL!	0	0	0	0		2		0	0	2014-03-31	11	11.8	4	23	39.8	39.8	39.8	150	150	150	64	64	64	17.6889	110	115	106	112.5	108	110.5	76	68	69	72	72.5	68.5	89	88	86	72
988	OW	M	1	LE GERMOIR	10	1	ANNEXE	2001-06-26	3400	0	0	0	0		2		0	0	2014-03-31	12	12.9	4	23	38.8	38.8	38.8	150	150	150	62.1	62.1	62.1	17.2444	115	106	110	110.5	112.5	108	68	66	63	67	65.5	64.5	89	83	74	81
989	BT	F	0	LE GERMOIR	10	1	RUASHI	2002-07-05	3500	0	0	0	0		2		1	0	2014-03-31	11	12	4	24	42.1	42.2	42.15	146	146.1	146.05	64.5	64.4	64.45	19.7603	124	118	113	121	118.5	115.5	67	86	61	76.5	64	73.5	90	94	87	74
990	BF	M	1	LE GERMOIR	10	1	RUASHI	2002-02-26	2800	0	0	0	0		2		0	0	2014-03-31	12	12	4	24	33.9	33.9	33.9	144.4	144.3	144.35	59.1	59	59.05	16.2692	125	114	100	119.5	112.5	107	75	64	73	69.5	74	68.5	91	82	86	85
991	MK	F	0	LE GERMOIR	10	1	ANNEXE	2001-05-05	#NULL!	0	0	0	0		2		0	0	2014-03-31	12	13	4	23	34.9	35	34.95	152	152.2	152.1	59	59	59	15.1074	108	116	105	112	106.5	110.5	69	59	53	64	61	56	81	80	74	90
992	LB	M	1	LE GERMOIR	10	1	RUASHI	2001-11-11	2850	0	0	0	0		2		0	0	2014-03-31	12	12.8	4	26	30.4	30.4	30.4	143.7	143.5	143.6	60	60.1	60.05	14.7423	120	115	112	117.5	116	113.5	65	64	55	64.5	60	59.5	85	88	85	77
993	NM	F	0	LE GERMOIR	10	1	RUASHI	2002-02-08	3300	0	0	0	0		2		0	0	2014-03-31	12	12.1	4	23	37.1	37.1	37.1	147.5	147.5	147.5	60	60	60	17.0526	115	124	114	119.5	114.5	119	74	79	73	76.5	73.5	76	93	95	89	81
994	MO	F	0	LE GERMOIR	10	1	KAMPEMBA	2001-11-06	#NULL!	0	0	0	0		2		0	0	2014-03-31	12	12.8	4	23	43.4	43.4	43.4	141.2	141.2	141.2	64	64	64	21.7681	137	118	117	127.5	127	117.5	57	56	57	56.5	57	56.5	81	78	82	92
995	MB	F	0	LE GERMOIR	10	1	KAMPEMBA	1999-04-26	3200	0	0	0	0		2		0	1	2014-03-31	14	15	5	24	40.1	40.1	40.1	148.1	148	148.05	66.1	66	66.05	18.2948	124	121	112	122.5	118	116.5	76	74	66	75	71	70	89	94	93	128
996	AA	F	0	LE GERMOIR	10	1	LUBUMBASHI	2000-01-02	3600	0	0	0	0		2		0	1	2014-03-31	14	14.1	5	23	48.7	48.8	48.75	161	161	161	73	73	73	18.8071	125	113	113	119	119	113	63	55	64	59	63.5	59.5	85	82	87	84
997	KK	F	0	LE GERMOIR	10	1	KAMPEMBA	2000-01-02	3500	0	0	0	0		2		0	0	2014-03-31	14	14.1	5	27	51.6	51.7	51.65	162.1	162	162.05	75.5	75.5	75.5	19.6685	114	110	122	112	118	116	80	80	67	80	73.5	73.5	92	92	87	76
998	MM	M	1	LE GERMOIR	10	1	ANNEXE	2000-03-31	3250	0	0	0	0		2		0	0	2014-03-31	14	14	5	27	42.5	42.5	42.5	151.1	151.2	151.15	66.1	66	66.05	18.6026	130	137	127	133.5	128.5	132	74	60	83	67	78.5	71.5	97	91	96	65
999	LE	M	1	LE GERMOIR	10	1	ANNEXE	2001-08-23	3000	0	0	0	0		2		0	0	2014-03-31	12	12.9	4	27	40.4	40.5	40.45	161.6	161.5	161.55	63.5	63.4	63.45	15.499	112	104	109	108	110.5	106.5	69	70	65	69.5	67	67.5	85	87	81	75
1000	SJ	M	1	LE GERMOIR	10	1	KAMPEMBA	1999-06-26	3500	0	0	0	0		2		0	0	2014-03-31	14	14.9	5	27	36	36	36	148.2	148.3	148.25	62.1	62	62.05	16.38	121	118	105	119.5	113	111.5	81	74	70	77.5	75.5	72	92	88	87	88
1001	MM	F	0	LE GERMOIR	10	1	RUASHI	1999-03-27	#NULL!	0	0	0	0		2		0	0	2014-03-31	15	15	5	22	46.8	46.8	46.8	154	154	154	71	71	71	19.7335	124	107	113	115.5	118.5	110	70	68	67	69	68.5	67.5	89	83	83	74
1002	TK	M	1	LE GERMOIR	10	1	RUASHI	2000-10-03	3500	0	0	0	0		2		0	0	2014-03-31	13	13.9	4	27	32.7	32.7	32.7	140.5	140.4	140.45	60.1	60	60.05	16.5769	119	111	109	115	114	110	59	69	57	64	58	63	83	85	80	70
1003	LN	M	1	LE GERMOIR	10	1	KAMPEMBA	1999-04-04	2000	0	0	0	0		2		0	0	2014-03-31	14	15	5	27	42	42	42	154.7	154.5	154.6	65.5	65.6	65.55	17.5724	109	112	105	110.5	107	108.5	72	70	77	71	74.5	73.5	89	86	91	73
1004	NM	M	1	LE GERMOIR	10	1	RUASHI	2001-08-04	3100	0	0	0	0		2		0	0	2014-03-31	12	12.9	4	24	29.7	29.7	29.7	144.5	144.3	144.4	63.1	63	63.05	14.2437	100	100	95	100	97.5	97.5	55	63	57	59	56	60	69	76	70	87
1005	KW	M	1	LE GERMOIR	10	1	RUASHI	2001-09-01	#NULL!	0	0	0	0		2		0	0	2014-03-31	12	12.9	4	25	33.9	33.9	33.9	151	151	151	59.5	59.4	59.45	14.8678	115	111	114	113	114.5	112.5	70	68	64	69	67	66	89	85	86	75
1006	NK	M	1	LE GERMOIR	10	1	RUASHI	2001-09-22	4700	0	0	0	0		2		0	0	2014-03-31	12	12.8	4	24	37.2	37.2	37.2	140.5	140.4	140.45	68.5	68.4	68.45	18.8582	114	98	86	106	100	92	71	69	64	70	67.5	66.5	85	80	71	80
1008	SO	M	1	LE GERMOIR	10	1	ANNEXE	1999-10-16	3800	0	0	0	0		2		0	0	2014-03-31	14	14.8	5	27	39.1	39	39.05	157.1	157	157.05	65	65	65	15.8323	104	102	124	103	114	113	62	72	64	67	63	68	79	84	82	69
1009	KK	F	0	LE GERMOIR	10	1	KAMPEMBA	1999-10-12	3800	0	0	0	0		2		0	0	2014-03-31	14	14.8	5	27	44	43.9	43.95	156.1	156	156.05	66.1	66.2	66.15	18.0481	137	130	126	133.5	131.5	128	72	68	69	70	70.5	68.5	98	92	94	84
1010	JN	M	1	LE GERMOIR	10	1	KAMPEMBA	2000-07-23	#NULL!	0	0	0	0		2		0	0	2014-04-02	13	13.9	4	22	44.3	44.2	44.25	143.9	144	143.95	67.5	67.4	67.45	21.3545	123	115	109	119	116	112	79	76	85	77.5	82	80.5	92	93	96	77
1011	mp	M	1	LE GERMOIR	10	1	KAMPEMBA	2001-11-09	5000	0	0	0	0		2		0	0	2014-03-31	12	12.8	4	27	28.6	28.5	28.55	131.5	131.4	131.45	59.1	59	59.05	16.5228	98	99	105	98.5	101.5	102	72	65	58	68.5	65	61.5	82	87	77	71
1012	BA	F	0	LE GERMOIR	10	1	RUASHI	1999-07-03	4300	0	0	0	0		2		0	0	2014-03-31	14	15	5	23	52.9	53	52.95	157.5	157.5	157.5	72	72	72	21.3454	95	108	101	101.5	98	104.5	62	68	64	65	63	66	77	83	79	73
1013	MI	M	1	LE GERMOIR	10	1	KAMPEMBA	2001-07-14	#NULL!	0	0	0	0		2		0	0	2014-03-31	12	12.9	4	22	33.1	33.1	33.1	138.1	138	138.05	59.5	59.4	59.45	17.3682	115	106	113	110.5	114	109.5	64	70	69	67	66.5	69.5	85	83	85	73
1014	BB	F	0	LE GERMOIR	10	1	ANNEXE	2002-12-28	2300	0	0	0	0		2		0	0	2014-03-31	11	11.7	4	23	38.1	38.1	38.1	139.2	139.1	139.15	58.4	58.5	58.45	19.677	100	93	90	96.5	95	91.5	62	62	55	62	58.5	58.5	76	83	73	71
1015	MX	F	0	LE GERMOIR	10	1	KAMPEMBA	2001-10-21	2200	0	0	0	0		2		0	0	2014-03-31	12	12.8	4	23	39.5	39.5	39.5	143.1	143	143.05	56.1	56	56.05	19.3028	125	115	111	120	118	113	67	68	58	67.5	62.5	63	92	87	81	73
1016	JN	F	0	LE GERMOIR	10	1	KAMPEMBA	2000-07-07	3400	0	0	0	0		2		0	0	2014-03-31	13	13.9	4	24	54.2	54.3	54.25	148.2	148.1	148.15	80	80.1	80.05	24.717	133	135	125	134	129	130	90	84	79	87	84.5	81.5	105	100	96	91
1017	UN	F	0	LE GERMOIR	10	1	KAMPEMBA	1999-12-05	#NULL!	0	0	0	0		2		0	0	2014-04-02	14	14.8	5	22	45.1	45.1	45.1	152	152	152	65.5	65.4	65.45	19.5204	126	120	117	123	121.5	118.5	84	77	72	80.5	78	74.5	106	93	93	64
1018	NZ	F	0	LE GERMOIR	10	1	RUASHI	2000-05-07	3200	0	0	0	0		2		0	0	2014-03-31	13	14	5	22	51.2	51.2	51.2	153.7	153.5	153.6	69.1	69	69.05	21.7014	117	119	113	118	115	116	75	68	72	71.5	73.5	70	90	88	89	84
1019	MK	F	0	LE GERMOIR	10	1	KAMPEMBA	2001-09-28	2600	0	0	0	0		2		0	0	2014-03-31	12	12.8	4	23	33.2	33.2	33.2	146.1	146	146.05	56.1	56	56.05	15.5645	127	116	108	121.5	117.5	112	65	66	64	65.5	64.5	65	82	80	81	102
1020	KT	F	0	LE GERMOIR	10	1	LUBUMBASHI	1999-12-30	3000	0	0	0	0		2		0	0	2014-04-02	14	14.7	5	22	53.5	53.5	53.5	146.5	146.4	146.45	74.5	74.7	74.6	24.9445	105	100	114	102.5	109.5	107	69	73	70	71	69.5	71.5	79	85	85	81
1021	BB	F	0	LE GERMOIR	10	1	KAMPEMBA	2001-05-05	#NULL!	0	0	0	0		2		0	0	2014-03-31	12	13	4	24	46	46	46	155.3	155.3	155.3	67.5	67.5	67.5	19.0728	122	107	114	114.5	118	110.5	71	56	52	63.5	61.5	54	87	81	78	82
1022	LN	F	0	LE GERMOIR	10	1	KAMPEMBA	2000-04-12	2700	0	0	0	0		2		0	0	2014-04-02	13	14	5	22	48.8	48.8	48.8	159.7	159.8	159.75	69.5	69.4	69.45	19.1222	132	123	117	127.5	124.5	120	88	80	71	84	79.5	75.5	104	110	87	74
1023	MK	F	0	LE GERMOIR	10	1	RUASHI	1999-02-27	#NULL!	0	0	0	0		2		0	0	2014-03-31	15	15	5	23	48.6	48.5	48.55	158.5	158.3	158.4	65.5	65.4	65.45	19.3499	128	126	120	127	124	123	82	85	79	83.5	80.5	82	104	103	97	86
1024	MM	M	1	LE GERMOIR	11	1	RUASHI	1999-10-11	3500	0	0	0	0		2		0	0	2014-04-02	14	14.8	5	23	52.4	52.5	52.45	153.2	153.1	153.15	68.1	68	68.05	22.362	130	127	114	128.5	122	120.5	87	82	77	84.5	82	79.5	103	99	99	70
1025	HH	F	0	LE GERMOIR	11	1	KAMPEMBA	2000-04-04	3200	0	0	0	0		2		0	0	2014-04-02	13	14	5	23	61.3	61.3	61.3	154.5	154.4	154.45	76.5	76.4	76.45	25.6971	157	155	145	156	151	150	92	80	83	86	87.5	81.5	116	116	108	118
1026	BC	F	0	LE GERMOIR	11	1	KAMPEMBA	1998-05-05	2950	0	0	0	0		2		0	0	2014-04-02	15	16	5	22	53.5	53.5	53.5	146.2	146	146.1	75.1	75	75.05	25.0642	128	123	117	125.5	122.5	120	71	73	63	72	67	68	92	89	86	70
1027	SK	F	0	LE GERMOIR	11	1	RUASHI	2000-06-06	3500	0	0	0	0		2		0	0	2014-04-01	13	13.9	4	24	52.2	52.5	52.35	154.5	154.5	154.5	69.5	69.4	69.45	21.9311	95	101	104	98	99.5	102.5	68	69	64	68.5	66	66.5	78	81	79	68
1028	NI	M	1	LE GERMOIR	11	1	KAMPEMBA	1999-03-08	2200	0	0	0	0		2		0	0	2014-04-02	15	15	5	22	65	64.9	64.95	165.1	165	165.05	81.3	81.2	81.25	23.8423	132	117	111	124.5	121.5	114	87	67	70	77	78.5	68.5	103	85	84	65
1029	EK	M	1	LE GERMOIR	11	1	KAMPEMBA	1997-02-07	4000	0	0	0	0		2		0	0	2014-04-02	17	17	5	22	56.5	56.5	56.5	166.8	166.7	166.75	68.5	68.6	68.55	20.3197	114	107	105	110.5	109.5	106	65	71	64	68	64.5	67.5	84	84	82	62
1030	KN	F	0	LE GERMOIR	11	1	KAMPEMBA	2000-01-01	2800	0	0	0	0		2		1	1	2014-04-01	14	14.1	5	23	47.5	47.5	47.5	160.3	160.2	160.25	67.1	67	67.05	18.4968	119	118	119	118.5	119	118.5	82	81	79	81.5	80.5	80	99	89	101	90
1031	MB	F	0	LE GERMOIR	11	1	KAMPEMBA	1999-02-14	#NULL!	0	0	0	0		2		0	0	2014-04-01	15	15	5	23	45.4	45.5	45.45	165	165.1	165.05	65	65.1	65.05	16.6841	123	120	120	121.5	121.5	120	71	84	73	77.5	72	78.5	93	98	94	83
1032	MK	F	0	LE GERMOIR	11	1	KAMPEMBA	2000-06-11	#NULL!	0	0	0	0		2		0	0	2014-04-01	13	13.9	4	27	55.3	55.3	55.3	150.5	150.4	150.45	79.4	79.5	79.45	24.431	152	143	142	147.5	147	142.5	91	72	72	81.5	81.5	72	113	103	88	83
1033	NK	F	0	LE GERMOIR	11	1	KAMPEMBA	1998-03-29	2500	0	0	0	0		2		1	0	2014-04-01	16	16	5	27	45.3	45.2	45.25	154.5	154.4	154.45	69.1	69	69.05	18.9689	106	118	116	112	111	117	78	77	71	77.5	74.5	74	90	91	91	99
1034	BB	M	1	LE GERMOIR	11	1	KAMPEMBA	1999-03-14	2800	0	0	0	0		2		0	0	2014-04-02	15	15	5	22	54.3	54.4	54.35	171.8	171.7	171.75	72.5	72.4	72.45	18.4249	138	137	136	137.5	137	136.5	90	87	97	88.5	93.5	92	108	106	114	48
1035	KM	M	1	LE GERMOIR	11	1	RUASHI	1999-09-09	3100	0	0	0	0		2		0	0	2014-04-01	14	14.8	5	27	52.9	52.9	52.9	151.8	151.7	151.75	71.5	71.4	71.45	22.972	125	116	115	120.5	120	115.5	58	60	60	59	59	60	90	83	78	65
1036	MN	M	1	LE GERMOIR	11	1	KAMPEMBA	1998-12-18	3000	0	0	0	0		2		0	0	2014-04-01	15	15.7	5	24	51.1	51	51.05	167	167.1	167.05	69.5	69	69.25	18.2938	110	112	104	111	107	108	56	53	47	54.5	51.5	50	78	76	72	70
1037	MK	F	0	LE GERMOIR	11	1	KAMPEMBA	1999-01-14	#NULL!	0	0	0	0		2		0	0	2014-04-01	15	15.1	5	23	47.8	47.8	47.8	169.1	169	169.05	67	67	67	16.7262	115	114	117	114.5	116	115.5	71	74	66	72.5	68.5	70	84	89	86	75
1038	OO	F	0	LE GERMOIR	11	1	KAMPEMBA	2000-09-15	2600	0	0	0	0		2		0	0	2014-04-01	13	13.8	4	23	57.2	57.2	57.2	153.3	153.2	153.25	76.5	76.4	76.45	24.3554	123	129	124	126	123.5	126.5	59	67	66	63	62.5	66.5	92	88	85	86
1039	MK	M	1	LE GERMOIR	11	1	KAMPEMBA	1999-03-07	3500	0	0	0	0		2		0	0	2014-04-01	15	15	5	27	33.6	33.6	33.6	145.5	145.4	145.45	59.5	59.4	59.45	15.8822	95	95	109	95	102	102	64	70	83	67	73.5	76.5	81	83	91	77
1040	KF	F	0	LE GERMOIR	11	1	KAMPEMBA	2001-09-28	#NULL!	0	0	0	0		2		0	0	2014-04-01	12	12.8	4	26	39.4	39.4	39.4	143.5	143.5	143.5	65.1	65	65.05	19.1334	114	109	106	111.5	110	107.5	74	74	66	74	70	70	90	86	85	70
1041	NM	M	1	LE GERMOIR	11	1	KAMPEMBA	1997-04-24	2500	0	0	0	0		2		0	0	2014-04-01	16	16.9	5	27	47.9	47.8	47.85	177.8	177.7	177.75	68.5	68.4	68.45	15.1448	126	115	113	120.5	119.5	114	67	66	59	66.5	63	62.5	88	87	86	65
1042	MM	F	0	LE GERMOIR	11	1	RUASHI	2001-01-16	#NULL!	0	0	0	0		2		0	0	2014-04-04	13	13.1	4	27	35	36.5	35.75	143.1	142.9	143	64.5	64.4	64.45	17.4825	110	111	111	110.5	110.5	111	74	69	70	71.5	72	69.5	88	83	84	77
1043	SD	F	0	LE GERMOIR	11	1	RUASHI	2000-09-10	2200	0	0	0	0		2		0	0	2014-04-01	13	13.8	4	24	43	43.1	43.05	147.5	147.3	147.4	69	69.1	69.05	19.8143	102	102	99	102	100.5	100.5	59	52	65	55.5	62	58.5	73	66	78	77
1044	AA	F	0	LE GERMOIR	11	1	KAMPEMBA	1998-06-23	3500	0	0	0	0		2		0	0	2014-04-01	15	15.9	5	27	61.2	61.3	61.25	173.8	173.7	173.75	78.5	78.4	78.45	20.2888	133	133	127	133	130	130	75	70	76	72.5	75.5	73	95	92	91	76
1045	NK	M	1	LE GERMOIR	11	1	KAMPEMBA	2000-08-09	3600	0	0	0	0		2		1	0	2014-04-01	13	13.9	4	27	35.3	35.3	35.3	140.5	140.2	140.35	61	61.1	61.05	17.9205	113	107	106	110	109.5	106.5	66	73	62	69.5	64	67.5	89	84	81	78
1046	YN	F	0	LE GERMOIR	11	1	KAMPEMBA	2001-04-20	#NULL!	0	0	0	0		2		0	0	2014-04-01	12	12.9	4	24	37.7	37.7	37.7	146.3	143.2	144.75	63.1	63	63.05	17.993	83	89	104	86	93.5	96.5	45	52	70	48.5	57.5	61	55	65	85	83
1047	NL	F	0	LE GERMOIR	11	1	KAMPEMBA	2001-05-05	#NULL!	0	0	0	0		2		1	0	2014-04-01	12	13	4	27	43.8	43.9	43.85	142.1	142	142.05	69.4	69.3	69.35	21.7314	119	110	117	114.5	118	113.5	70	66	61	68	65.5	63.5	90	78	81	63
1048	NK	F	0	LE GERMOIR	11	1	ANNEXE	1999-03-06	2750	0	0	0	0		2		0	0	2014-04-01	15	15	5	27	56.4	56.3	56.35	149.4	149.5	149.45	75.6	75.5	75.55	25.2291	132	137	132	134.5	132	134.5	70	82	71	76	70.5	76.5	92	100	92	88
1049	KK	M	1	LE GERMOIR	11	1	KAMPEMBA	2001-02-16	3200	0	0	0	0		2		1	1	2014-04-01	13	13	4	27	50.1	50.1	50.1	157.1	157	157.05	69	69.1	69.05	20.3124	122	116	120	119	121	118	77	74	69	75.5	73	71.5	89	87	93	84
1050	KM	F	0	LE GERMOIR	11	1	ANNEXE	1998-08-14	2500	0	0	0	0		2		1	0	2014-04-01	15	15.8	5	27	58.3	58.3	58.3	150.9	151	150.95	77.1	77	77.05	25.586	139	141	140	140	139.5	140.5	83	83	66	83	74.5	74.5	107	103	92	87
1051	KK	M	1	LE GERMOIR	11	1	KAMPEMBA	1999-08-16	#NULL!	0	0	0	0		2		0	0	2014-04-01	14	14.8	5	27	54.3	54.4	54.35	175.5	175.5	175.5	74.3	74.2	74.25	17.646	102	100	100	101	101	100	59	61	65	60	62	63	80	75	79	52
1052	KK	M	1	LE GERMOIR	11	1	ANNEXE	1999-04-29	2500	0	0	0	0		2		0	0	2014-04-01	14	14.9	5	27	50.5	50.6	50.55	169.5	169.4	169.45	69.1	69	69.05	17.6051	148	158	142	153	145	150	80	73	81	76.5	80.5	77	104	110	102	59
1053	YK	F	0	LE GERMOIR	11	1	KAMPEMBA	2000-02-01	#NULL!	0	0	0	0		2		0	0	2014-04-01	14	14.1	5	23	48.4	48.5	48.45	159.1	159	159.05	68.1	68	68.05	19.1525	115	129	119	122	117	124	69	75	75	72	72	75	96	94	92	76
1054	MK	F	0	LE GERMOIR	11	1	KAMPEMBA	1998-03-05	2800	0	0	0	0		2		0	0	2014-04-01	16	16	5	27	51.7	51.7	51.7	170.8	170.7	170.75	69	69.1	69.05	17.7325	122	126	123	124	122.5	124.5	68	73	76	70.5	72	74.5	92	94	94	84
1055	MT	F	0	LE GERMOIR	11	1	ANNEXE	1999-04-15	#NULL!	0	0	0	0		2		0	0	2014-04-01	14	15	5	27	50.8	50.7	50.75	160.1	160	160.05	72.1	72	72.05	19.8118	123	117	117	120	120	117	74	84	73	79	73.5	78.5	90	94	88	68
1056	KM	F	0	LE GERMOIR	11	1	RUASHI	1998-01-08	#NULL!	0	0	0	0		2		1	1	2014-04-01	16	16.1	5	28	52.8	52.8	52.8	150.7	150.8	150.75	73.2	73.1	73.15	23.2337	110	114	113	112	111.5	113.5	66	67	67	66.5	66.5	67	86	92	85	74
1057	kk	F	0	LE GERMOIR	11	1	RUASHI	2000-03-08	3340	0	0	0	0		2		0	0	2014-04-01	14	14	5	27	46.9	46.9	46.9	163.7	163.8	163.75	67	66.9	66.95	17.4908	136	142	139	139	137.5	140.5	96	89	83	92.5	89.5	86	111	106	110	96
1058	KR	M	1	LE GERMOIR	11	1	KAMPEMBA	1999-01-02	2800	0	0	0	0		2		0	0	2014-04-01	15	15.1	5	27	50.1	50.1	50.1	163.5	163.4	163.45	68	68.1	68.05	18.7529	129	124	111	126.5	120	117.5	75	69	65	72	70	67	94	92	84	66
1059	MT	F	0	LE GERMOIR	12	1	KAMPEMBA	1998-01-03	#NULL!	0	0	0	0		2		0	0	2014-04-02	16	16.1	5	24	58.6	58.6	58.6	162.5	162.4	162.45	75	75.1	75.05	22.2054	116	114	112	115	114	113	74	68	65	71	69.5	66.5	86	86	81	63
1060	NM	F	0	LE GERMOIR	12	1	KAMPEMBA	1997-01-26	3000	0	0	0	0		2		0	0	2014-04-02	17	17	5	24	57.3	57.2	57.25	175.5	175.4	175.45	70.1	70	70.05	18.5981	145	132	139	138.5	142	135.5	78	71	77	74.5	77.5	74	103	97	101	95
1061	BM	M	1	LE GERMOIR	12	1	KAMPEMBA	1997-08-03	3200	0	0	0	0		2		1	0	2014-04-02	16	16.9	5	24	56.9	57	56.95	162.7	162.8	162.75	74	74.1	74.05	21.5007	138	133	131	135.5	134.5	132	77	71	75	74	76	73	102	95	97	83
1062	AA	F	0	LE GERMOIR	12	1	LUBUMBASHI	1997-02-01	3300	0	0	0	0		2		0	1	2014-04-01	17	17.1	5	25	51	51	51	169	169	169	68.1	68	68.05	17.8565	110	114	114	112	112	114	72	73	61	72.5	66.5	67	86	91	83	81
1063	NS	F	0	LE GERMOIR	12	1	ANNEXE	1997-03-30	2000	0	0	0	0		2		0	0	2014-04-02	17	17	5	24	48.3	48.2	48.25	166.1	166	166.05	68.1	68	68.05	17.4993	146	145	133	145.5	139.5	139	76	68	78	72	77	73	100	96	97	105
1064	KO	F	0	LE GERMOIR	12	1	RUASHI	1998-06-21	2900	0	0	0	0		2		0	0	2014-04-02	15	15.9	5	24	49.1	49.2	49.15	168.1	168	168.05	67.5	67.4	67.45	17.4039	132	130	125	131	128.5	127.5	74	71	63	72.5	68.5	67	95	90	85	81
1065	MK	M	1	LE GERMOIR	12	1	KAMPEMBA	1998-12-02	#NULL!	0	0	0	0		2		0	0	2014-04-02	15	15.8	5	24	59.2	59.1	59.15	168.1	168	168.05	70.1	70	70.05	20.9449	139	133	126	136	132.5	129.5	80	75	70	77.5	75	72.5	100	92	92	81
1066	KK	F	0	LE GERMOIR	12	1	KAMPEMBA	1998-08-08	3800	0	0	0	0		2		0	0	2014-04-02	16	15.9	5	24	49.5	49.5	49.5	170.8	170.7	170.75	67.1	67	67.05	16.9779	141	134	129	137.5	135	131.5	73	80	81	76.5	77	80.5	102	102	111	97
1067	IM	M	1	LE GERMOIR	12	1	ANNEXE	1998-03-14	3500	0	0	0	0		2		0	0	2014-04-02	16	16	5	24	58.1	58.1	58.1	175.1	175.2	175.15	72.5	72.4	72.45	18.9389	132	129	126	130.5	129	127.5	69	69	68	69	68.5	68.5	90	86	87	70
1068	MR	F	0	LE GERMOIR	12	1	KAMPEMBA	1997-11-01	3600	0	0	0	0		2		0	0	2014-04-02	16	16.8	5	23	59.2	59.2	59.2	168.5	168.4	168.45	76.1	76	76.05	20.8631	138	134	146	136	142	140	90	88	86	89	88	87	115	105	109	84
1069	MA	F	0	LE GERMOIR	12	1	KAMPEMBA	1999-11-30	4500	0	0	0	0		2		0	0	2014-04-02	14	14.7	5	29	51.1	51.1	51.1	174.1	174.2	174.15	66.1	66	66.05	16.849	132	131	120	131.5	126	125.5	65	70	69	67.5	67	69.5	88	92	88	81
1070	KN	F	0	LE GERMOIR	12	1	KAMPEMBA	1999-01-10	#NULL!	0	0	0	0		2		0	0	2014-04-02	15	15.1	5	23	52.6	52.6	52.6	169.1	169	169.05	73.1	73.2	73.15	18.4058	150	148	152	149	151	150	95	89	89	92	92	89	113	113	111	103
1072	KB	F	0	LE GERMOIR	12	1	KAMPEMBA	1999-02-08	2040	0	0	0	0		2		0	0	2014-04-02	15	15	5	23	48.3	48.3	48.3	170.1	170	170.05	73.2	73.1	73.15	16.703	139	137	122	138	130.5	129.5	69	70	70	69.5	69.5	70	99	94	90	103
1073	IN	F	0	LE GERMOIR	12	1	RUASHI	1999-09-19	3500	0	0	0	0		2		0	0	2014-04-02	14	14.8	5	23	37.9	37.9	37.9	152.5	152.4	152.45	62.5	62.4	62.45	16.3074	119	110	108	114.5	113.5	109	76	68	71	72	73.5	69.5	89	83	84	82
1074	OA	M	1	LE GERMOIR	12	1	KAMPEMBA	1997-05-05	4200	0	0	0	0		2		0	0	2014-04-02	16	17	5	23	50.7	50.8	50.75	165.6	165.5	165.55	70.7	70.6	70.65	18.5173	117	118	110	117.5	113.5	114	73	70	64	71.5	68.5	67	88	91	83	65
1075	MM	M	1	LE GERMOIR	12	1	KAMPEMBA	1997-06-26	3500	0	0	0	0		2		0	0	2014-04-02	16	16.9	5	22	54.3	54.2	54.25	166.1	166	166.05	71	71.1	71.05	19.6753	122	114	129	118	125.5	121.5	80	68	85	74	82.5	76.5	95	88	100	65
1076	KD	F	0	LE GERMOIR	12	1	LUBUMBASHI	2001-03-09	#NULL!	0	0	0	0		2		0	0	2014-04-02	13	13	4	23	47.1	47.1	47.1	144.2	144.3	144.25	68.5	68.5	68.5	22.6355	129	121	124	125	126.5	122.5	81	63	74	72	77.5	68.5	95	84	84	86
1077	MB	F	0	LE GERMOIR	12	1	KAMPEMBA	1999-11-01	4200	0	0	0	0		2		0	0	2014-04-02	14	14.8	5	23	48.4	48.4	48.4	152.5	152.4	152.45	65.6	65.5	65.55	20.8253	138	137	137	137.5	137.5	137	84	78	83	81	83.5	80.5	106	103	104	73
1078	LO	F	0	LE GERMOIR	12	1	RUASHI	1999-11-15	4520	0	0	0	0		2		0	0	2014-04-02	14	14.8	5	23	76.8	76.8	76.8	161.5	161.5	161.5	85	85	85	29.4453	103	108	105	105.5	104	106.5	66	66	65	66	65.5	65.5	76	83	80	56
1079	SK	M	1	LE GERMOIR	12	1	RUASHI	1998-04-20	2600	0	0	0	0		2		0	0	2014-04-02	15	16	5	22	41.7	41.6	41.65	169.5	169.4	169.45	66.8	66.7	66.75	14.5055	123	112	111	117.5	117	111.5	73	71	72	72	72.5	71.5	93	93	91	67
1080	SS	M	1	LE GERMOIR	12	1	ANNEXE	1998-08-28	2950	0	0	0	0		2		0	0	2014-04-02	15	15.8	5	24	46	46.1	46.05	166.5	166.4	166.45	68.5	68.4	68.45	16.6212	135	123	123	129	129	123	71	63	65	67	68	64	94	87	83	73
1081	NW	F	0	LE GERMOIR	12	1	KAMPEMBA	1999-03-03	4000	0	0	0	0		2		0	0	2014-04-03	15	15	5	27	49.6	49.5	49.55	162.9	163	162.95	73	73.1	73.05	18.661	128	131	125	129.5	126.5	128	73	74	77	73.5	75	75.5	95	94	92	82
1082	MM	M	1	LE GERMOIR	12	1	KAMPEMBA	2000-07-23	2800	0	0	0	0		2		0	0	2014-04-04	13	13.9	4	24	35.2	35.2	35.2	150.5	150.4	150.45	60.1	60	60.05	15.551	112	112	105	112	108.5	108.5	72	76	69	74	70.5	72.5	89	91	87	65
1083	BK	F	0	LE GERMOIR	12	1	KAMPEMBA	2000-10-11	2900	0	0	0	0		2		0	0	2014-04-03	13	13.8	4	27	65	65	65	160.5	160.5	160.5	79	79	79	25.2327	113	98	107	105.5	110	102.5	72	63	60	67.5	66	61.5	90	76	78	79
1084	MM	M	1	LE GERMOIR	12	1	RUASHI	1999-03-06	#NULL!	0	0	0	0		2		0	0	2014-04-04	15	15	5	24	62.5	62.5	62.5	166.5	166.4	166.45	75.5	75.4	75.45	22.5586	126	127	121	126.5	123.5	124	81	78	71	79.5	76	74.5	100	96	89	75
1085	MB	M	1	LE GERMOIR	12	1	KAMPEMBA	1999-02-05	#NULL!	0	0	0	0		2		0	0	2014-04-05	15	15.1	5	24	54.3	54.3	54.3	177.1	177	177.05	73	73.1	73.05	17.3224	113	112	109	112.5	111	110.5	71	64	62	67.5	66.5	63	90	88	82	73
1086	PK	M	1	LE GERMOIR	12	1	ANNEXE	1998-03-03	3000	0	0	0	0		2		0	0	2014-04-07	16	16	5	27	65	65	65	176.5	176.4	176.45	74.5	74.4	74.45	20.8771	125	124	126	124.5	125.5	125	66	66	64	66	65	65	98	93	85	56
1087	KK	M	1	LE GERMOIR	12	1	KAMPEMBA	1999-02-01	3200	0	0	0	0		2		0	0	2014-04-07	15	15.1	5	24	40.4	40.4	40.4	160.2	160.1	160.15	65.1	65.2	65.15	15.7517	112	115	113	113.5	112.5	114	65	74	61	69.5	63	67.5	81	88	85	77
1088	NM	M	1	LE GERMOIR	12	1	KAMPEMBA	1998-12-01	#NULL!	0	0	0	0		2		0	0	2014-04-05	15	15.8	5	27	64	64	64	175.1	175	175.05	75	75.1	75.05	20.886	139	129	126	134	132.5	127.5	57	61	62	59	59.5	61.5	87	90	86	60
1090	NW	M	1	LE GERMOIR	13	1	KAMPEMBA	1998-03-13	2800	0	0	0	0		2		0	0	2014-04-03	16	16	5	27	49	49	49	172.5	172.5	172.5	70.5	70.3	70.4	16.4671	135	125	122	130	128.5	123.5	72	77	81	74.5	76.5	79	94	95	93	58
1091	ML	M	1	LE GERMOIR	13	1	RUASHI	2000-01-28	3150	0	0	0	0		2		0	0	2014-04-03	14	14	5	27	47.7	47.7	47.7	163.5	163.4	163.45	72	72	72	17.8545	130	120	110	125	120	115	79	75	67	77	73	71	95	91	82	75
1092	BM	M	1	LE GERMOIR	13	1	KAMPEMBA	1997-03-30	4500	0	0	0	0		2		0	0	2014-04-03	17	17	5	27	61.6	61.6	61.6	171.5	171.4	171.45	73.1	73	73.05	20.9559	125	119	121	122	123	120	79	69	74	74	76.5	71.5	105	88	90	67
1093	KT	M	1	LE GERMOIR	13	1	RUASHI	1998-06-02	3200	0	0	0	0		2		0	0	2014-04-03	15	15.9	5	27	51.1	51.1	51.1	167.9	168	167.95	68.1	68	68.05	18.1159	112	122	112	117	112	117	69	69	69	69	69	69	85	92	86	64
1094	KK	M	1	LE GERMOIR	13	1	RUASHI	1998-03-16	2800	0	0	0	0		2		0	0	2014-04-03	16	16	5	27	59.3	59.3	59.3	173.7	173.5	173.6	73.1	73	73.05	19.6768	137	138	130	137.5	133.5	134	78	71	85	74.5	81.5	78	99	97	101	62
1095	MT	F	0	LE GERMOIR	13	1	LUBUMBASHI	1998-11-12	3100	0	0	0	0		2		0	0	2014-04-03	15	15.8	5	27	72.8	72.8	72.8	164.5	164.4	164.45	74	74.1	74.05	26.9193	133	130	135	131.5	134	132.5	83	79	73	81	78	76	108	98	104	91
1096	NK	F	0	LE GERMOIR	13	1	RUASHI	1997-10-17	2500	0	0	0	0		2		0	0	2014-04-03	16	16.8	5	27	62.2	62.1	62.15	179	179	179	72.5	72.5	72.5	19.397	122	124	122	123	122	123	86	90	74	88	80	82	102	106	92	70
1097	NK	M	1	LE GERMOIR	13	1	RUASHI	1998-08-09	3300	0	0	0	0		2		0	0	2014-04-03	15	15.9	5	27	47	47.1	47.05	159.5	159.5	159.5	69.1	69	69.05	18.4943	117	108	105	112.5	111	106.5	67	70	68	68.5	67.5	69	88	84	80	75
1098	MK	F	0	LE GERMOIR	13	1	KAMPEMBA	1997-06-13	2600	0	0	0	0		2		0	0	2014-04-03	16	16.9	5	27	46.9	46.9	46.9	166.1	166	166.05	68.5	68.4	68.45	17.0096	120	109	125	114.5	122.5	117	76	79	76	77.5	76	77.5	96	96	92	72
1099	MN	F	0	LE GERMOIR	13	1	ANNEXE	1998-10-11	3950	0	0	0	0		2		0	0	2014-04-03	15	15.8	5	27	48.7	48.7	48.7	169	169.1	169.05	67	67.1	67.05	17.0411	123	123	124	123	123.5	123.5	85	77	78	81	81.5	77.5	100	101	98	68
1100	NW	F	0	LE GERMOIR	13	1	RUASHI	1998-08-19	2500	0	0	0	0		2		0	0	2014-04-03	15	15.8	5	27	49.3	49.3	49.3	167.5	167.4	167.45	73	73.9	73.45	17.5823	128	120	119	124	123.5	119.5	96	83	85	89.5	90.5	84	115	96	98	134
1101	IK	F	0	LE GERMOIR	13	1	ANNEXE	1998-08-13	3000	0	0	0	0		2		0	0	2014-04-03	15	15.9	5	27	48.7	48.6	48.65	162.7	162.8	162.75	65.5	65.5	65.5	18.3671	132	125	118	128.5	125	121.5	91	82	72	86.5	81.5	77	109	98	89	94
1102	NM	F	0	LE GERMOIR	13	1	ANNEXE	1998-08-10	2500	0	0	0	0		2		0	0	2014-04-03	15	15.9	5	26	54.5	54.5	54.5	160.2	160.1	160.15	83	83.1	83.05	21.2492	117	106	113	111.5	115	109.5	70	63	65	66.5	67.5	64	84	78	81	73
1103	NA	F	0	LE GERMOIR	13	1	KAMPEMBA	1997-01-25	3000	0	0	0	0		2		0	0	2014-04-03	17	17	5	27	51.2	51.2	51.2	170.7	170.5	170.6	72	72.1	72.05	17.5919	131	139	135	135	133	137	86	98	76	92	81	87	105	110	99	93
1104	KN	F	0	LE GERMOIR	13	1	KAMPEMBA	1997-10-01	3500	0	0	0	0		2		0	0	2014-04-03	16	16.8	5	24	55.8	55.7	55.75	169.1	169	169.05	78.2	78	78.1	19.5081	125	121	139	123	132	130	77	80	83	78.5	80	81.5	95	101	114	114
1106	FM	F	0	LE GERMOIR	13	1	KAMPEMBA	1998-05-04	2600	0	0	0	0		2		0	0	2014-04-03	15	16	5	27	48.1	48	48.05	162	162.1	162.05	66.5	66.5	66.5	18.2977	126	115	117	120.5	121.5	116	70	72	75	71	72.5	73.5	86	84	89	82
1107	FZ	F	0	LE GERMOIR	13	1	KAMPEMBA	1997-08-05	4000	0	0	0	0		2		0	0	2014-04-03	16	16.9	5	24	52.4	52.4	52.4	172.1	172	172.05	69.1	69	69.05	17.702	124	127	111	125.5	117.5	119	68	68	80	68	74	74	90	88	92	84
1108	IM	F	0	LE GERMOIR	13	1	ANNEXE	1999-01-26	2750	0	0	0	0		2		0	0	2014-04-03	15	15	5	26	38.9	38.9	38.9	153.1	153	153.05	65.1	65	65.05	16.6067	105	98	113	101.5	109	105.5	69	63	78	66	73.5	70.5	86	73	95	85
1109	MM	F	0	LE GERMOIR	13	1	KAMPEMBA	1999-02-08	2460	0	0	0	0		2		0	0	2014-04-03	15	15	5	26	43.5	43.5	43.5	165.1	165.2	165.15	65	65.1	65.05	15.949	122	125	112	123.5	117	118.5	57	64	61	60.5	59	62.5	80	82	80	80
1110	NI	F	0	LE GERMOIR	13	1	RUASHI	1996-05-23	3600	0	0	0	0		2		0	0	2014-04-03	17	17.9	5	24	41.1	41.1	41.1	167.5	167.5	167.5	65	65.1	65.05	14.6491	118	102	109	110	113.5	105.5	71	65	73	68	72	69	88	82	88	80
1111	BS	M	1	LE GERMOIR	13	1	ANNEXE	1997-07-07	3200	0	0	0	0		2		0	0	2014-04-05	16	16.9	5	27	54	54.1	54.05	171.8	172	171.9	71.5	71.6	71.55	18.2913	125	122	121	123.5	123	121.5	65	67	64	66	64.5	65.5	87	87	89	75
1112	MT	F	0	LE GERMOIR	13	1	KAMPEMBA	1998-12-18	3000	0	0	0	0		2		0	0	2014-04-05	15	15.7	5	26	51.3	51.3	51.3	171	171.1	171.05	71	71.1	71.05	17.5336	123	118	111	120.5	117	114.5	82	64	80	73	81	72	96	90	92	60
1113	ID	M	1	LE GERMOIR	13	1	KAMPEMBA	1997-12-12	2700	0	0	0	0		2		0	0	2014-04-05	16	16.7	5	26	49.7	49.7	49.7	170.7	170.5	170.6	70.2	70	70.1	17.0765	139	126	132	132.5	135.5	129	79	71	71	75	75	71	99	93	97	65
1114	KM	M	1	LE GERMOIR	13	1	KAMPEMBA	1998-12-12	2600	0	0	0	0		2		0	0	2014-04-05	15	15.7	5	26	54.5	54.6	54.55	161.2	161.3	161.25	71.5	71.6	71.55	20.9795	128	119	127	123.5	127.5	123	73	69	66	71	69.5	67.5	95	89	89	72
1115	MP	M	1	LE GERMOIR	13	1	KAMPEMBA	1998-05-23	2800	0	0	0	0		2		0	0	2014-04-05	15	15.9	5	27	59.7	59.8	59.75	179.5	179.4	179.45	77.2	77.1	77.15	18.5546	135	117	120	126	127.5	118.5	69	82	79	75.5	74	80.5	96	100	96	77
1117	MI	M	1	LE GERMOIR	13	1	RUASHI	1998-08-22	3100	0	0	0	0		2		0	0	2014-04-05	15	15.8	5	26	59	59	59	162.5	162.4	162.45	71	71	71	22.357	144	134	141	139	142.5	137.5	75	79	79	77	77	79	101	100	102	92
1118	IL	M	1	LE GERMOIR	13	1	RUASHI	1996-11-13	2500	0	0	0	0		2		0	0	2014-04-05	17	17.8	5	27	64.7	64.6	64.65	175.5	175.6	175.55	74.1	74	74.05	20.9781	131	123	136	127	133.5	129.5	91	79	95	85	93	87	114	96	107	72
1119	NW	M	1	LE GERMOIR	13	1	RUASHI	1996-10-05	3000	0	0	0	0		2		0	1	2014-04-07	17	17.8	5	27	47.8	47.8	47.8	176.1	176	176.05	64.5	64.4	64.45	15.4225	125	121	130	123	127.5	125.5	79	70	75	74.5	77	72.5	92	96	91	92
1121	MK	M	1	LE GERMOIR	13	1	KAMPEMBA	1997-10-26	3000	0	0	0	0		2		0	0	2014-04-07	16	16.8	5	24	59.4	59.4	59.4	167.4	167.5	167.45	72.5	72.6	72.55	21.1844	114	109	113	111.5	113.5	111	64	65	68	64.5	66	66.5	89	80	88	60
1122	MF	F	0	LE GERMOIR	13	1	KAMPEMBA	1998-06-27	2400	0	0	0	0		2		0	0	2014-04-07	15	15.9	5	23	45.6	45.6	45.6	168.1	168	168.05	70.5	70.6	70.55	16.1468	125	114	119	119.5	122	116.5	77	74	79	75.5	78	76.5	99	89	92	91
1123	LM	F	0	LE GERMOIR	13	1	KAMPEMBA	1996-10-20	2600	0	0	0	0		2		0	0	2014-04-07	17	17.8	5	23	52	52.1	52.05	167.6	167.5	167.55	71	71.1	71.05	18.5409	128	117	121	122.5	124.5	119	77	63	84	70	80.5	73.5	96	86	95	72
1124	BM	F	0	LE GERMOIR	13	1	KAMPEMBA	1997-09-01	3800	0	0	0	0		2		0	0	2014-04-07	16	16.9	5	23	59.1	59.1	59.1	172.1	172	172.05	78.5	78.6	78.55	19.9654	128	124	122	126	125	123	61	75	77	68	69	76	89	89	90	87
1126	MM	F	0	LE GERMOIR	14	1	KAMPEMBA	1997-02-11	3100	0	0	0	0		2		0	0	2014-04-04	17	17	5	24	55.2	55.2	55.2	178.1	178	178.05	72.1	72.1	72.1	17.4123	110	110	115	110	112.5	112.5	66	66	69	66	67.5	67.5	83	82	84	89
1127	MT	F	0	LE GERMOIR	14	1	RUASHI	1997-10-27	2800	0	0	0	0		2		0	0	2014-04-04	16	16.8	5	26	46.8	46.7	46.75	172.5	172.4	172.45	65.5	65.4	65.45	15.7201	113	112	117	112.5	115	114.5	61	56	66	58.5	63.5	61	77	76	82	78
1129	KK	M	1	LE GERMOIR	14	1	RUASHI	1998-11-29	2700	0	0	0	0		2		0	0	2014-04-04	15	15.7	5	27	51.7	51.7	51.7	156.5	156.5	156.5	68.1	68	68.05	21.1087	130	129	120	129.5	125	124.5	69	67	73	68	71	70	93	89	94	67
1130	MK	M	1	LE GERMOIR	14	1	RUASHI	1996-11-29	#NULL!	0	0	0	0		2		0	0	2014-04-04	17	17.7	5	27	45.8	45.8	45.8	175.1	175	175.05	67.5	67.4	67.45	14.9466	118	108	115	113	116.5	111.5	68	70	74	69	71	72	80	86	86	87
1132	KM	F	0	LE GERMOIR	14	1	RUASHI	1998-10-13	3500	0	0	0	0		2		0	0	2014-04-04	15	15.8	5	24	47.6	47.5	47.55	160.1	160.2	160.15	71.5	71.4	71.45	18.5394	128	136	127	132	127.5	131.5	74	66	78	70	76	72	96	94	97	81
1135	MK	M	1	LE GERMOIR	14	1	ANNEXE	1997-05-25	3500	0	0	0	0		2		0	1	2014-04-04	16	16.9	5	24	65.5	65.5	65.5	182.5	182.4	182.45	77.2	77	77.1	19.6768	144	147	144	145.5	144	145.5	83	78	73	80.5	78	75.5	110	113	107	82
1137	IN	M	1	LE GERMOIR	14	1	KAMPEMBA	1997-03-30	3000	0	0	0	0		2		0	0	2014-04-07	17	17	5	23	49.8	49.8	49.8	172.1	172	172.05	65.1	65	65.05	16.8236	127	128	128	127.5	127.5	128	69	73	75	71	72	74	89	92	92	60
1141	KN	F	0	LE GERMOIR	14	1	KAMPEMBA	1996-06-30	3400	0	0	0	0		2		1	0	2014-04-04	17	17.9	5	26	47.5	47.5	47.5	165.2	165.1	165.15	67.1	67	67.05	17.4155	127	130	132	128.5	129.5	131	74	69	83	71.5	78.5	76	97	91	99	82
1144	KK	F	0	LE GERMOIR	14	1	KAMPEMBA	1997-04-14	3400	0	0	0	0		2		0	1	2014-04-04	16	17	5	27	56.5	56.5	56.5	167.2	167.1	167.15	73.1	73	73.05	20.2225	117	117	114	117	115.5	115.5	67	67	67	67	67	67	88	85	88	59
1145	WT	M	1	LE GERMOIR	14	1	RUASHI	1996-08-12	3840	0	0	0	0		2		0	0	2014-04-04	17	17.9	5	27	44	44.1	44.05	164.6	164.7	164.65	66.1	66	66.05	16.2488	141	146	143	143.5	142	144.5	87	94	84	90.5	85.5	89	104	109	101	95
1148	MT	F	0	LE GERMOIR	14	1	RUASHI	1998-06-30	2900	0	0	0	0		2		0	0	2014-04-05	15	15.9	5	26	51.9	51.9	51.9	168.4	168.5	168.45	72.1	72	72.05	18.2905	121	114	114	117.5	117.5	114	68	75	84	71.5	76	79.5	90	90	95	66
1149	KM	F	0	LE GERMOIR	14	1	RUASHI	1997-11-01	3500	0	0	0	0		2		0	0	2014-04-03	16	16.8	5	27	54.1	54.1	54.1	173.5	173.5	173.5	69.2	69.1	69.15	17.9721	138	126	128	132	133	127	83	72	69	77.5	76	70.5	100	93	91	77
1150	PN	M	1	LE GERMOIR	14	1	KAMPEMBA	1999-01-05	3800	0	0	0	0		2		0	1	2014-04-03	15	15.1	5	27	59.4	59.4	59.4	161.7	161	161.35	68.5	68.4	68.45	22.8165	138	122	128	130	133	125	72	78	64	75	68	71	98	92	89	72
1151	MK	F	0	LE GERMOIR	14	1	KAMPEMBA	1998-06-23	2300	0	0	0	0		2		0	0	2014-04-03	15	15.9	5	27	49.7	49.7	49.7	157.5	157	157.25	67.1	67	67.05	20.099	146	132	138	139	142	135	82	71	67	76.5	74.5	69	104	96	98	84
1154	AM	M	1	LE GERMOIR	14	1	KAMPEMBA	1997-12-21	#NULL!	0	0	0	0		2		0	0	2014-04-04	16	16.7	5	27	50.1	50	50.05	165.5	165.4	165.45	72.5	72.5	72.5	18.284	121	115	113	118	117	114	71	72	66	71.5	68.5	69	87	86	85	66
1155	IK	M	1	LE GERMOIR	14	1	KAMPEMBA	1997-03-10	#NULL!	0	0	0	0		2		0	0	2014-04-04	17	17	5	27	54.3	54.3	54.3	176.1	176.2	176.15	67.1	67	67.05	17.4999	135	127	137	131	136	132	93	78	75	85.5	84	76.5	105	97	97	73
1159	NM	F	0	LE GERMOIR	14	1	KAMPEMBA	1998-12-17	2850	0	0	0	0		2		0	0	2014-04-03	15	15.7	5	27	45.1	45.1	45.1	153.4	153.5	153.45	60.5	60.4	60.45	19.1533	139	133	130	136	134.5	131.5	81	79	67	80	74	73	101	98	98	86
1160	MM	F	0	LE GERMOIR	14	1	KAMPEMBA	1998-06-01	2800	0	0	0	0		2		1	0	2014-04-03	15	15.9	5	27	58.2	58.1	58.15	176.6	176.5	176.55	81.1	81	81.05	18.6558	146	138	145	142	145.5	141.5	87	68	68	77.5	77.5	68	105	95	100	100
1161	TN	F	0	LE GERMOIR	14	1	LUBUMBASHI	1996-06-15	3150	0	0	0	0		2		0	0	2014-04-03	17	17.9	5	27	50.2	50.2	50.2	174.5	174.5	174.5	65	65	65	16.4859	112	107	104	109.5	108	105.5	74	68	77	71	75.5	72.5	89	87	88	78
1165	MN	M	1	LE GERMOIR	14	1	KAMPEMBA	1998-07-15	3200	0	0	0	0		2		1	0	2014-04-03	15	15.9	5	27	41.4	41.4	41.4	161	161	161	67.2	67	67.1	15.9716	125	119	107	122	116	113	76	67	71	71.5	73.5	69	94	87	87	73
1174	BO	M	1	LE GERMOIR	15	1	KAMPEMBA	1997-11-29	4000	0	0	0	0		2		0	0	2014-04-07	16	16.7	5	27	55	55	55	163.1	163	163.05	74	74.1	74.05	20.6881	117	117	113	117	115	115	70	67	66	68.5	68	66.5	84	85	83	73
1178	NB	M	1	LE GERMOIR	15	1	KAMPEMBA	1996-06-06	3000	0	0	0	0		2		0	0	2014-04-04	17	17.9	5	27	61.1	61	61.05	172.1	172.2	172.15	75.1	75	75.05	20.6002	130	122	119	126	124.5	120.5	77	77	77	77	77	77	100	95	94	66
1182	MR	F	0	LE GERMOIR	15	1	KAMPEMBA	1996-08-02	#NULL!	0	0	0	0		2		0	0	2014-04-04	17	17.9	5	27	69.4	69.4	69.4	176.5	176.4	176.45	82.5	82.5	82.5	22.2903	127	121	116	124	121.5	118.5	71	69	74	70	72.5	71.5	90	92	88	80
1184	MB	F	0	LE GERMOIR	15	1	KAMPEMBA	1996-05-25	3000	0	0	0	0		2		0	0	2014-04-04	17	17.9	5	27	52.4	52.4	52.4	170.1	170	170.05	73.1	73	73.05	18.1208	133	134	128	133.5	130.5	131	79	64	75	71.5	77	69.5	98	88	96	84
1185	KT	F	0	LE GERMOIR	15	1	KAMPEMBA	1998-12-16	2600	0	0	0	0		2		0	0	2014-04-04	15	15.7	5	27	66.5	66.5	66.5	171.5	171.4	171.45	80.5	80.4	80.45	22.6228	146	142	138	144	142	140	88	72	67	80	77.5	69.5	112	98	93	79
1186	KK	F	0	LE GERMOIR	15	1	KAMPEMBA	1997-02-19	2950	0	0	0	0		2		0	0	2014-04-04	17	17	5	27	58.7	58.7	58.7	170.5	170.6	170.55	73.1	73	73.05	20.1806	134	134	124	134	129	129	79	69	72	74	75.5	70.5	97	91	91	91
1189	MK	F	0	LE GERMOIR	15	1	ANNEXE	1997-02-11	3600	0	0	0	0		2		0	0	2014-04-04	17	17	5	27	54.9	54.9	54.9	174.5	174.4	174.45	68.1	68	68.05	18.0397	117	112	114	114.5	115.5	113	73	67	68	70	70.5	67.5	88	81	90	108
1193	BK	F	0	LE GERMOIR	15	1	KAMPEMBA	1996-06-06	3200	0	0	0	0		2		0	0	2014-04-03	17	17.9	5	28	55.8	55.8	55.8	163.2	163.1	163.15	73	73	73	20.9633	141	134	131	137.5	136	132.5	80	92	81	86	80.5	86.5	98	92	97	66
1196	NM	F	0	LE GERMOIR	15	1	KAMPEMBA	1998-02-14	3500	0	0	0	0		2		0	0	2014-04-03	16	16	5	28	51.1	51.1	51.1	170.8	170.8	170.8	71.5	71.5	71.5	17.5164	141	140	135	140.5	138	137.5	72	74	74	73	73	74	95	97	98	81
1197	IM	F	0	LE GERMOIR	15	1	ANNEXE	1996-09-20	3500	0	0	0	0		2		0	0	2014-04-03	17	17.8	5	28	60.7	60.7	60.7	173.5	173.5	173.5	76.5	76.5	76.5	20.1646	133	130	125	131.5	129	127.5	81	90	77	85.5	79	83.5	100	110	101	66
1199	MK	F	0	LE GERMOIR	15	1	ANNEXE	1998-05-15	3000	0	0	0	0		2		0	0	2014-04-03	15	15.9	5	28	49.2	49.2	49.2	162.5	162.5	162.5	71.1	71	71.05	18.632	141	133	127	137	134	130	82	71	65	76.5	73.5	68	101	96	95	81
1205	IK	M	1	LE GERMOIR	15	1	KAMPEMBA	1999-03-02	3700	0	0	0	0		2		0	0	2014-04-03	15	15	5	28	61.3	61.3	61.3	166.5	166.4	166.45	75.1	75	75.05	22.1255	135	144	149	139.5	142	146.5	73	74	77	73.5	75	75.5	95	100	105	68
1211	NK	F	0	EBEN- EZER	12	1	KAMPEMBA	1997-04-25	3500	0	0	0	0		2		0	0	2014-05-06	17	17	5	25	61.9	61.2	61.55	155.1	155	155.05	75.4	75.4	75.4	25.6026	128	135	132	131.5	130	133.5	76	73	69	74.5	72.5	71	97	93	89	70
1212	LM	M	1	EBEN- EZER	10	1	KAMPEMBA	1997-06-26	2800	0	0	0	0		2		0	0	2014-05-07	16	16.9	5	23	52	51.8	51.9	159	159.1	159.05	71.5	71.5	71.5	20.5163	111	102	106	106.5	108.5	104	50	64	57	57	53.5	60.5	71	77	76	62
1213	MS	F	0	EBEN- EZER	13	1	KAMPEMBA	1998-05-12	3200	0	0	0	0		2		0	0	2014-05-07	15	16	5	24	48.2	48	48.1	161	161.1	161.05	68.4	68.4	68.4	18.5449	152	148	131	150	141.5	139.5	77	72	87	74.5	82	79.5	106	100	116	80
1214	KT	F	0	EBEN- EZER	13	1	KAMPEMBA	1996-10-11	2900	0	0	0	0		2		0	0	2014-05-07	17	17.8	5	24	54.4	54.5	54.45	153	153	153	75.9	76	75.95	23.2603	108	114	121	111	114.5	117.5	75	78	84	76.5	79.5	81	89	91	98	86
1215	NK	M	1	EBEN- EZER	14	1	KAMPEMBA	1996-11-17	3000	0	0	0	0		2		0	0	2014-05-07	17	17.8	5	24	47.6	47.6	47.6	160	160.1	160.05	61.3	61.4	61.35	18.5821	118	110	152	114	135	131	78	81	77	79.5	77.5	79	94	97	107	96
1218	DN	M	1	EBEN- EZER	10	1	KAMPEMBA	2001-11-12	3600	0	0	0	0		2		0	1	2014-05-06	12	12.8	4	26	36.6	36.6	36.6	143.5	143.7	143.6	62.9	62.8	62.85	17.7489	109	102	108	105.5	108.5	105	53	63	63	58	58	63	79	77	82	70
1219	IM	F	0	EBEN- EZER	14	1	KAMPEMBA	1998-12-01	3200	0	0	0	0		2		0	0	2014-05-08	15	15.8	5	27	49.9	49.9	49.9	159.2	159.4	159.3	70.1	70.1	70.1	19.6639	135	120	127	127.5	131	123.5	70	78	86	74	78	82	101	103	102	96
1221	KW	F	0	EBEN- EZER	14	1	KAMPEMBA	1997-10-01	3450	0	0	0	0		2		0	0	2014-05-08	16	16.9	5	24	42.9	42.9	42.9	148.2	148.4	148.3	61.6	61.4	61.5	19.5063	127	119	113	123	120	116	62	57	68	59.5	65	62.5	88	84	88	55
1222	KN	M	1	EBEN- EZER	14	1	KAMPEMBA	1997-06-01	2500	0	0	0	0		2		0	1	2014-07-08	17	17	5	24	59.5	59.6	59.55	166.4	166.4	166.4	71.1	71	71.05	21.5068	113	113	108	113	110.5	110.5	73	72	74	72.5	73.5	73	94	88	87	63
1223	MA	F	0	EBEN- EZER	14	1	ANNEXE	1997-10-17	3600	0	0	0	0		2		0	0	2014-05-08	16	16.8	5	22	62	62	62	170	170	170	72	72	72	21.4533	100	117	96	108.5	98	106.5	72	82	52	77	62	67	84	82	74	86
1224	BB	M	1	EBEN- EZER	14	1	KAMPEMBA	1996-12-20	3600	0	0	0	0		2		0	0	2014-05-06	17	17.8	5	27	67.4	67.4	67.4	187	187.1	187.05	73.9	74	73.95	19.2639	142	152	136	147	139	144	78	76	70	77	74	73	104	106	105	57
1229	MM	M	1	EBEN- EZER	15	1	KAMPEMBA	1998-11-15	#NULL!	0	0	0	0		2		0	0	2014-05-12	15	15.8	5	27	74.7	74.6	74.65	184	183.7	183.85	75.4	75.4	75.4	22.0853	124	134	113	129	118.5	123.5	78	74	75	76	76.5	74.5	96	95	95	74
1234	NK	M	1	EBEN- EZER	15	1	ANNEXE	1996-11-16	2800	0	0	0	0		2		0	0	2014-05-12	17	17.8	5	28	63.8	64	63.9	169.1	169.3	169.2	72	71.4	71.7	22.3203	125	126	129	125.5	127	127.5	82	65	70	73.5	76	67.5	97	89	96	73
1236	KM	F	0	EBEN- EZER	15	1	KAMPEMBA	1997-07-24	#NULL!	0	0	0	0		2		0	1	2014-05-12	16	16.9	5	28	48.8	48.6	48.7	159.2	159.2	159.2	68.3	68.6	68.45	19.2151	99	103	115	101	107	109	65	51	54	58	59.5	52.5	78	78	74	83
1238	MM	F	0	EBEN- EZER	12	1	KAMPEMBA	2000-12-16	3200	0	0	0	0		2		0	0	2014-05-12	13	13.8	4	28	50.4	50.3	50.35	152.9	152.3	152.6	66.5	66.5	66.5	21.6217	124	119	117	121.5	120.5	118	88	75	89	81.5	88.5	82	102	95	102	86
1239	MT	M	1	EBEN- EZER	12	1	ANNEXE	1996-07-15	3500	0	0	0	0		2		0	0	2014-05-12	17	17.9	5	28	45.4	45.7	45.55	158.5	158.9	158.7	65.9	66.3	66.1	18.0857	155	130	134	142.5	144.5	132	109	101	101	105	105	101	129	126	110	144
1240	KE	M	1	EBEN- EZER	10	1	KAMPEMBA	1999-08-04	#NULL!	0	0	0	0		2		0	0	2014-05-12	14	14.9	5	28	61.1	61.1	61.1	170.1	170.4	170.25	73.1	73.5	73.3	21.0798	137	135	130	136	133.5	132.5	76	85	80	80.5	78	82.5	95	100	93	88
1245	TK	M	1	EBEN- EZER	13	1	KAMPEMBA	1996-11-25	3500	0	0	0	0		2		0	0	2014-05-12	17	17.8	5	30	59.9	59.8	59.85	170.1	170	170.05	72.5	72.3	72.4	20.6972	128	124	126	126	127	125	68	64	59	66	63.5	61.5	89	88	86	51
1246	MW	F	0	EBEN- EZER	10	1	KAMPEMBA	2000-02-26	3400	0	0	0	0		2		0	1	2014-05-12	14	14.1	5	27	51	51.1	51.05	153	153.2	153.1	73.1	72.9	73	21.7794	128	120	115	124	121.5	117.5	67	70	68	68.5	67.5	69	90	88	87	74
1247	NM	M	1	EBEN- EZER	10	1	KAMPEMBA	2000-11-15	4000	0	0	0	0		2		1	0	2014-05-05	13	13.8	4	24	45.1	45.2	45.15	160.3	160.4	160.35	67.9	67.7	67.8	17.5598	125	128	115	126.5	120	121.5	67	73	55	70	61	64	86	90	84	65
1249	KK	M	1	EBEN- EZER	12	1	KAMPEMBA	1998-03-18	1800	0	0	0	0		2		0	1	2014-05-05	16	16	5	27	55.6	55.8	55.7	171.6	171.5	171.55	72.6	72.7	72.65	18.9266	129	132	124	130.5	126.5	128	70	67	58	68.5	64	62.5	92	89	87	82
1251	MS	M	1	EBEN- EZER	15	1	KAMPEMBA	1997-04-21	4000	0	0	0	0		2		0	0	2014-05-09	17	17	5	23	51.8	51.9	51.85	164.1	164.3	164.2	69	69.4	69.2	19.231	130	117	116	123.5	123	116.5	70	75	59	72.5	64.5	67	89	94	77	69
1257	AK	F	0	EBEN- EZER	14	1	KAMPEMBA	1996-12-28	3800	0	0	0	0		2		0	0	2014-05-09	17	17.7	5	22	64	64	64	167.8	167.5	167.65	81.7	81.7	81.7	22.7705	125	131	119	128	122	125	84	71	73	77.5	78.5	72	102	103	99	61
1258	KK	F	0	EBEN- EZER	13	1	ANNEXE	1997-03-01	4950	0	0	0	0		2		0	0	2014-05-06	17	17.1	5	22	46.3	46.3	46.3	154.3	154.3	154.3	73	73	73	19.4468	127	128	116	127.5	121.5	122	80	81	78	80.5	79	79.5	98	102	97	76
1259	M	M	1	EBEN- EZER	15	1	ANNEXE	1997-03-11	#NULL!	0	0	0	0		2		0	0	2014-05-09	17	17.1	5	27	64.9	64.7	64.8	174.1	174.4	174.25	73	72.8	72.9	21.3417	120	115	116	117.5	118	115.5	83	82	85	82.5	84	83.5	97	100	99	80
1261	MM	M	1	EBEN- EZER	11	1	KAMPEMBA	1999-02-11	3300	0	0	0	0		2		0	0	2014-05-09	15	15.1	5	27	48.1	48.2	48.15	161.5	161.7	161.6	65	65.4	65.2	18.438	131	119	118	125	124.5	118.5	87	88	70	87.5	78.5	79	101	99	88	63
1262	KM	F	0	EBEN- EZER	15	1	ANNEXE	1997-12-10	3500	0	0	0	0		2		0	0	2014-05-09	16	16.8	5	22	66.3	66.5	66.4	170.5	170.6	170.55	79.1	79.4	79.25	22.8278	104	109	115	106.5	109.5	112	68	70	72	69	70	71	84	86	86	84
1265	RN	M	1	EBEN- EZER	11	1	KAMPEMBA	1998-04-18	#NULL!	0	0	0	0		2		0	0	2014-05-07	16	16	5	23	43.2	43.3	43.25	154.4	154.4	154.4	67	67.1	67.05	18.1423	106	111	106	108.5	106	108.5	68	50	52	59	60	51	79	71	71	75
1266	YM	F	0	EBEN- EZER	13	1	KAMPEMBA	1997-02-21	2950	0	0	0	0		2		0	0	2014-05-06	17	17	5	28	60.6	60.5	60.55	154.2	154.3	154.25	77.1	77.1	77.1	25.4486	107	114	105	110.5	106	109.5	71	69	71	70	71	70	85	82	81	71
1267	DW	M	1	EBEN- EZER	13	1	KAMPEMBA	1998-09-30	3800	0	0	0	0		2		0	0	2014-05-09	15	15.8	5	22	60.7	60.7	60.7	167.5	167.7	167.6	72.5	72.5	72.5	21.6093	107	119	113	113	110	116	72	64	67	68	69.5	65.5	86	86	94	55
1268	KY	F	0	EBEN- EZER	11	1	KAMPEMBA	2001-04-24	3500	0	0	0	0		2		0	0	2014-05-05	13	13	4	27	40.2	40.4	40.3	143	143.8	143.4	67.1	67.3	67.2	19.5978	102	100	106	101	104	103	68	59	77	63.5	72.5	68	78	73	88	83
1270	KM	F	0	EBEN- EZER	12	1	KAMPEMBA	1997-05-22	3500	0	0	0	0		2		0	0	2014-05-06	16	17	5	27	47.2	47.1	47.15	154.4	154.5	154.45	66.4	66.5	66.45	19.7654	118	110	109	114	113.5	109.5	65	72	68	68.5	66.5	70	83	84	83	70
1271	KL	M	1	EBEN- EZER	10	1	KAMPEMBA	1998-09-07	#NULL!	0	0	0	0		2		0	0	2014-05-06	15	15.9	5	27	53.3	53.4	53.35	172.1	172.3	172.2	72.3	72.2	72.25	17.9915	122	130	125	126	123.5	127.5	85	71	71	78	78	71	101	94	93	74
1272	BM	M	1	EBEN- EZER	10	1	KAMPEMBA	2001-04-03	#NULL!	0	0	0	0		2		0	0	2014-05-06	13	13	4	24	36.6	36.6	36.6	144.1	144	144.05	62.4	62.2	62.3	17.6382	93	95	99	94	96	97	55	52	58	53.5	56.5	55	67	66	74	58
1273	PM	F	0	EBEN- EZER	10	1	KAMPEMBA	1999-05-26	#NULL!	0	0	0	0		2		0	0	2014-05-06	14	14.9	5	24	41.3	41.2	41.25	152.5	152.6	152.55	64.8	64.6	64.7	17.7255	131	101	104	116	117.5	102.5	70	57	79	63.5	74.5	68	89	72	86	57
1274	MK	F	0	EBEN- EZER	13	1	KAMPEMBA	1998-06-07	#NULL!	0	0	0	0		2		0	0	2014-05-08	15	16	5	27	79.7	79.3	79.5	167	167	167	84.2	84	84.1	28.5059	143	133	125	138	134	129	93	86	80	89.5	86.5	83	105	97	90	93
1275	TG	F	0	EBEN- EZER	12	1	KAMPEMBA	1998-04-03	#NULL!	0	0	0	0		2		0	0	2014-05-08	16	16	5	22	56.2	56.3	56.25	159.1	159.2	159.15	72	72	72	22.208	110	104	104	107	107	104	68	69	65	68.5	66.5	67	82	82	85	80
1277	MM	M	1	EBEN- EZER	10	1	KAMPEMBA	1997-11-16	#NULL!	0	0	0	0		2		0	0	2014-05-08	16	16.8	5	25	60.9	60.9	60.9	174.3	174.5	174.4	73	73	73	20.0228	123	121	124	122	123.5	122.5	71	73	72	72	71.5	72.5	100	87	97	77
1278	MN	F	0	EBEN- EZER	13	1	KAMPEMBA	1997-05-30	3500	0	0	0	0		2		0	0	2014-05-06	16	16.9	5	25	50.4	50.4	50.4	153.9	154	153.95	66	66.1	66.05	21.2653	105	106	109	105.5	107	107.5	62	69	63	65.5	62.5	66	79	82	80	74
1279	BT	F	0	EBEN- EZER	13	1	KAMPEMBA	1998-01-01	3000	0	0	0	0		2		0	0	2014-05-06	16	16.1	5	25	52.2	52.2	52.2	157.3	157.5	157.4	71.3	71.4	71.35	21.0698	103	117	99	110	101	108	76	61	59	68.5	67.5	60	86	77	79	74
1280	MK	M	1	EBEN- EZER	10	1	KAMPEMBA	2000-10-04	3900	0	0	0	0		2		0	0	2014-05-07	13	13.9	4	23	49.7	49.7	49.7	159.7	159.5	159.6	65.5	65.6	65.55	19.5115	114	112	120	113	117	116	61	71	64	66	62.5	67.5	80	88	81	77
1281	MM	F	0	EBEN- EZER	13	1	ANNEXE	1998-12-25	3200	0	0	0	0		2		0	0	2014-05-07	15	15.7	5	24	42.2	42.3	42.25	154.1	154.4	154.25	67.5	67.5	67.5	17.7573	128	133	132	130.5	130	132.5	75	71	69	73	72	70	102	96	98	82
1282	SS	M	1	EBEN- EZER	14	1	KAMPEMBA	1996-08-02	#NULL!	0	0	0	0		2		0	0	2014-05-07	17	17.9	5	24	55.7	55.7	55.7	171.3	171.2	171.25	70	70	70	18.993	134	133	113	133.5	123.5	123	72	74	74	73	73	74	105	92	92	112
1284	BW	F	0	EBEN- EZER	14	1	KAMPEMBA	1997-08-10	#NULL!	0	0	0	0		2		0	1	2014-05-06	16	16.9	5	27	47.9	47.8	47.85	158	158	158	67.8	67.8	67.8	19.1676	117	119	123	118	120	121	74	68	71	71	72.5	69.5	90	89	93	79
1285	MK	F	0	EBEN- EZER	13	1	KAMPEMBA	1997-11-03	5750	0	0	0	0		2		0	0	2014-05-06	16	16.8	5	27	48.6	48.5	48.55	146.5	146.4	146.45	74	74	74	22.6366	110	114	112	112	111	113	77	70	75	73.5	76	72.5	93	88	89	76
1286	MK	F	0	EBEN- EZER	12	1	KAMPEMBA	1997-01-02	3500	0	0	0	0		2		0	1	2014-05-08	17	17.1	5	22	44.2	44.3	44.25	161.4	161.4	161.4	66.1	66	66.05	16.9866	120	124	115	122	117.5	119.5	89	68	77	78.5	83	72.5	103	94	92	73
1288	NM	F	0	EBEN- EZER	11	1	KAMPEMBA	2001-12-15	3700	0	0	0	0		2		0	0	2014-07-08	12	12.8	4	24	46.6	46.5	46.55	147.5	147.2	147.35	67.9	67.8	67.85	21.4397	126	117	114	121.5	120	115.5	60	77	73	68.5	66.5	75	89	79	83	75
1289	MT	F	0	EBEN- EZER	12	1	ANNEXE	1998-06-17	2800	0	0	0	0		2		0	1	2014-05-08	15	15.9	5	22	52.9	52.4	52.65	154.3	154.2	154.25	75	74.9	74.95	22.1283	118	113	116	115.5	117	114.5	72	76	75	74	73.5	75.5	87	93	91	73
1290	BM	F	0	EBEN- EZER	10	1	KAMPEMBA	2000-06-11	2850	0	0	0	0		2		1	0	2014-07-08	14	14	5	24	47.1	47.2	47.15	155.9	155.4	155.65	72.2	72.5	72.35	19.4618	116	104	111	110	113.5	107.5	64	75	62	69.5	63	68.5	88	85	82	74
1293	MS	M	1	EBEN- EZER	15	1	ANNEXE	1996-10-30	4000	0	0	0	0		2		0	0	2014-05-12	17	17.8	5	27	64.2	64.2	64.2	168.4	168.6	168.5	73	73	73	22.6118	112	118	118	115	115	118	69	69	53	69	61	61	83	83	83	94
1294	IN	M	1	EBEN- EZER	15	1	KAMPEMBA	1996-10-12	3800	0	0	0	0		2		0	0	2014-05-12	17	17.9	5	27	60.6	60.9	60.75	165.3	165.6	165.45	71.1	71.5	71.3	22.1928	130	125	123	127.5	126.5	124	78	60	84	69	81	72	100	90	111	64
1295	ML	M	1	EBEN- EZER	15	1	KAMPEMBA	1997-02-17	3100	0	0	0	0		2		0	0	2014-05-12	17	17.1	5	27	70.2	70.6	70.4	174.5	174.5	174.5	76.5	76.3	76.4	23.1197	137	135	104	136	120.5	119.5	100	52	58	76	79	55	110	85	82	70
1297	NM	M	1	EBEN- EZER	15	1	KAMPEMBA	1997-01-01	2900	0	0	0	0		2		0	0	2014-05-09	17	17.1	5	22	53.2	53.2	53.2	167.2	167.5	167.35	67.1	67	67.05	18.9959	134	115	117	124.5	125.5	116	73	70	92	71.5	82.5	81	93	92	99	55
1300	MA	M	1	EBEN- EZER	14	1	ANNEXE	1998-03-04	#NULL!	0	0	0	0		2		0	0	2014-05-12	16	16.1	5	28	65.7	65.6	65.65	170.2	170.2	170.2	71.1	71.4	71.25	22.6629	123	116	123	119.5	123	119.5	70	70	70	70	70	70	87	88	87	71
1303	MN	M	1	EBEN- EZER	11	1	KAMPEMBA	2000-04-15	3100	0	0	0	0		2		0	0	2014-05-12	14	14	5	28	49.6	49.7	49.65	161.5	161.2	161.35	68.9	68.5	68.7	19.0713	133	118	112	125.5	122.5	115	79	78	74	78.5	76.5	76	104	102	91	97
1304	MM	F	0	EBEN- EZER	11	1	KAMPEMBA	1999-02-16	2800	0	0	0	0		2		0	1	2014-05-12	15	15.1	5	28	79.7	79.5	79.6	157	157.2	157.1	99.8	100.1	99.95	32.2523	135	130	125	132.5	130	127.5	86	79	82	82.5	84	80.5	104	98	94	77
1305	KT	M	1	EBEN- EZER	11	1	ANNEXE	1999-09-28	3850	0	0	0	0		2		0	0	2014-05-12	14	14.8	5	28	49.7	49.8	49.75	161.2	161.2	161.2	68.4	68.6	68.5	19.1453	132	110	117	121	124.5	113.5	68	59	65	63.5	66.5	62	102	79	80	78
1306	NK	M	1	EBEN- EZER	15	1	KAMPEMBA	1997-11-24	#NULL!	0	0	0	0		2		0	0	2014-05-12	16	16.8	5	30	52.9	52.7	52.8	164.8	164.4	164.6	70	69.8	69.9	19.4883	141	144	113	142.5	127	128.5	77	72	78	74.5	77.5	75	97	102	94	75
1309	BN	F	0	EBEN- EZER	13	1	KAMPEMBA	1997-04-17	4000	0	0	0	0		2		0	0	2014-05-12	17	17	5	30	50.2	50.5	50.35	151.3	151	151.15	71.5	71.4	71.45	22.0386	135	130	120	132.5	127.5	125	77	71	64	74	70.5	67.5	93	89	88	118
1310	KL	M	1	EBEN- EZER	12	1	KAMPEMBA	1997-03-08	#NULL!	0	0	0	0		2		0	1	2014-05-12	17	17.1	5	30	59.9	59.8	59.85	167	167	167	71.1	71	71.05	21.4601	141	152	131	146.5	136	141.5	73	73	76	73	74.5	74.5	98	105	99	90
1312	KN	M	1	EBEN- EZER	13	1	LUBUMBASHI	1997-10-10	2900	0	0	0	0		2		0	0	2014-05-12	16	16.9	5	30	38.6	38	38.3	155.1	155.1	155.1	62.2	62.8	62.5	15.9212	112	110	108	111	110	109	58	56	53	57	55.5	54.5	82	76	68	83
1313	KM	M	1	EBEN- EZER	11	1	KAMPEMBA	2000-06-18	3200	0	0	0	0		2		0	1	2014-05-05	13	13.9	4	27	47.3	47.2	47.25	156.1	156.1	156.1	67.9	68	67.95	19.3908	119	115	122	117	120.5	118.5	69	74	80	71.5	74.5	77	90	87	94	62
1314	KM	F	0	EBEN- EZER	11	1	KAMPEMBA	1999-11-01	3700	0	0	0	0		2		1	0	2014-05-05	14	14.8	5	25	61.9	61.7	61.8	150.3	149.9	150.1	79.5	80.1	79.8	27.4301	129	128	123	128.5	126	125.5	85	76	67	80.5	76	71.5	101	93	92	90
1317	KM	M	1	EBEN- EZER	13	1	ANNEXE	1998-06-22	5500	0	0	0	0		2		0	0	2014-05-05	15	15.9	5	24	45.3	45.3	45.3	161.3	161.4	161.35	66.5	66.4	66.45	17.4004	128	117	133	122.5	130.5	125	77	63	61	70	69	62	94	83	86	74
1319	KN	M	1	EBEN- EZER	15	1	ANNEXE	1996-07-27	3000	0	0	0	0		2		0	0	2014-05-09	17	17.9	5	24	44.2	44.2	44.2	172.9	172.9	172.9	63.4	63.4	63.4	14.7854	115	111	103	113	109	107	73	69	65	71	69	67	88	83	82	92
1323	MW	M	1	EBEN- EZER	11	1	KAMPEMBA	1999-01-01	2600	0	0	0	0		2		0	1	2014-05-09	15	15.1	5	24	59.1	58.7	58.9	161.1	161	161.05	77	77	77	22.7088	125	120	125	122.5	125	122.5	78	86	104	82	91	95	96	103	113	71
1324	AO	F	0	EBEN- EZER	11	1	KAMPEMBA	1999-04-06	4600	0	0	0	0		2		0	1	2014-05-09	15	15	5	24	53.9	53.9	53.9	151	151.1	151.05	76.4	76.2	76.3	23.6237	130	128	132	129	131	130	81	76	85	78.5	83	80.5	101	99	103	94
1326	KM	F	0	EBEN- EZER	11	1	KAMPEMBA	2001-04-29	3800	0	0	0	0		2		0	0	2014-05-09	13	13	4	22	47	47.1	47.05	162.1	162.1	162.1	69.5	69.4	69.45	17.9058	113	111	103	112	108	107	74	64	64	69	69	64	88	80	79	86
1327	SN	M	1	EBEN- EZER	14	1	KAMPEMBA	1998-03-08	#NULL!	0	0	0	0		2		0	0	2014-05-09	16	16.1	5	22	41.1	41.2	41.15	157.5	157.3	157.4	63	63	63	16.6096	105	99	103	102	104	101	79	73	73	76	76	73	87	88	82	76
1330	AM	M	1	EBEN- EZER	15	1	ANNEXE	1998-04-08	3200	0	0	0	0		2		0	0	2014-05-09	16	16	5	27	58.5	58.5	58.5	169.2	169.1	169.15	71	71.2	71.1	20.4462	110	121	121	115.5	115.5	121	77	76	76	76.5	76.5	76	96	90	100	100
1336	M	F	0	EBEN- EZER	14	1	KAMPEMBA	1996-09-16	2920	0	0	0	0		2		0	0	2014-05-06	17	17.9	5	28	48.5	48.4	48.45	161.1	169.9	165.5	66.5	66.5	66.5	17.6888	124	123	126	123.5	125	124.5	72	68	64	70	68	66	89	89	85	79
1337	KA	F	0	EBEN- EZER	10	1	ANNEXE	2001-02-03	2700	0	0	0	0		2		0	1	2014-05-09	13	13.1	4	22	52.1	52.1	52.1	158.6	158.5	158.55	72.5	72.2	72.35	20.7255	116	109	100	112.5	108	104.5	70	68	67	69	68.5	67.5	88	88	79	81
1338	MT	F	0	EBEN- EZER	14	1	ANNEXE	1998-02-25	#NULL!	0	0	0	0		2		0	1	2014-05-07	16	16	5	24	60.4	60.3	60.35	162	162	162	77.3	77.1	77.2	22.9957	115	107	126	111	120.5	116.5	68	56	65	62	66.5	60.5	84	78	84	68
1339	ND	M	1	EBEN- EZER	14	1	KAMPEMBA	1997-12-25	#NULL!	0	0	0	0		2		0	0	2014-05-07	16	16.7	5	23	64.5	64.7	64.6	171.3	171.2	171.25	73.8	73.8	73.8	22.0278	138	138	132	138	135	135	77	83	76	80	76.5	79.5	101	101	102	78
1340	IN	F	0	EBEN- EZER	12	1	LUBUMBASHI	1997-12-25	4200	0	0	0	0		2		0	0	2014-05-06	16	16.7	5	27	53.1	53	53.05	152.9	153	152.95	75.9	75.7	75.8	22.677	122	133	121	127.5	121.5	127	70	66	67	68	68.5	66.5	92	90	90	88
1342	MM	M	1	EBEN- EZER	14	1	KAMPEMBA	1996-06-18	#NULL!	0	0	0	0		2		0	0	2014-05-08	17	17.9	5	27	56.2	56.3	56.25	176	176	176	72.2	72	72.1	18.1592	139	129	133	134	136	131	75	79	67	77	71	73	103	98	102	57
1343	MK	F	0	EBEN- EZER	14	1	KAMPEMBA	1997-09-07	#NULL!	0	0	0	0		2		1	0	2014-07-08	16	16.9	5	27	47	46.8	46.9	154.8	154.9	154.85	69.9	70.1	70	19.5592	133	137	149	135	141	143	101	80	102	90.5	101.5	91	116	105	114	69
1345	BM	F	0	EBEN- EZER	13	1	KAMPEMBA	1997-09-07	#NULL!	0	0	0	0		2		0	0	2014-05-08	16	16.9	5	23	73.4	73.5	73.45	155.5	155.3	155.4	92.5	92.5	92.5	30.4151	116	122	118	119	117	120	75	65	61	70	68	63	97	86	87	99
1346	KN	F	0	EBEN- EZER	11	1	KAMPEMBA	1999-09-30	#NULL!	0	0	0	0		2		0	1	2014-05-06	14	14.8	5	25	47.2	47.1	47.15	153.6	153.4	153.5	67.6	67.6	67.6	20.0108	131	131	133	131	132	132	91	84	85	87.5	88	84.5	109	104	107	86
1348	NM	M	1	LE ROC	10	1	KAMPEMBA	2000-06-01	3500	0	0	0	0		2		0	0	2014-05-16	13	14	5	22	40.1	40.1	40.1	152.8	152.8	152.8	66	66.1	66.05	17.175	107	109	112	108	109.5	110.5	66	45	55	55.5	60.5	50	77	70	78	77
1349	SM	F	0	LE ROC	10	1	KAMPEMBA	2001-09-15	3200	0	0	0	0		2		0	0	2014-05-16	12	12.9	4	22	29.6	29.7	29.65	135.8	135.8	135.8	54.8	54.9	54.85	16.0777	102	109	111	105.5	106.5	110	71	70	65	70.5	68	67.5	81	85	77	80
1350	NA	M	1	LE ROC	10	1	KAMPEMBA	2000-06-23	3500	0	0	0	0		2		1	1	2014-05-16	13	14	5	22	41.3	41.4	41.35	156	156	156	60.5	60.5	60.5	16.9913	116	122	126	119	121	124	72	75	75	73.5	73.5	75	89	96	88	101
1351	OK	F	0	LE ROC	10	1	KAMPEMBA	2000-06-24	3500	0	0	0	0		2		0	0	2014-05-16	13	13.9	4	21	44.8	44.3	44.55	152	152	152	68.8	68.8	68.8	19.2824	118	119	116	118.5	117	117.5	70	68	59	69	64.5	63.5	95	85	82	106
1352	EN	F	0	LE ROC	10	1	ANNEXE	2002-01-02	#NULL!	0	0	0	0		2		0	0	2014-05-16	12	12.2	4	21	41	41	41	144	144	144	65.5	65.4	65.45	19.7724	144	128	123	136	133.5	125.5	76	79	80	77.5	78	79.5	96	101	96	98
1353	ML	F	0	LE ROC	10	1	KAMPEMBA	1999-03-22	#NULL!	0	0	0	0		2		0	0	2014-05-09	15	15	5	21	47	47	47	156.2	157.2	156.7	64.8	64.8	64.8	19.1408	130	128	117	129	123.5	122.5	86	65	58	75.5	72	61.5	101	87	86	80
1354	KM	F	0	LE ROC	10	1	KAMPEMBA	1999-03-05	4100	0	0	0	0		2		0	0	2014-05-16	15	15.1	5	20	56.6	56.6	56.6	156.6	156.6	156.6	75.2	75.2	75.2	23.0798	134	109	106	121.5	120	107.5	78	66	64	72	71	65	100	82	82	104
1355	KM	M	1	LE ROC	10	1	KAMPEMBA	2001-01-27	4500	0	0	0	0		2		0	0	2014-05-20	13	13.1	4	28	39.3	39.5	39.4	146	146	146	64.4	64.4	64.4	18.4838	105	105	104	105	104.5	104.5	58	65	63	61.5	60.5	64	73	81	81	68
1356	MN	F	0	LE ROC	10	1	KAMPEMBA	2002-06-18	2800	0	0	0	0		2		0	0	2014-05-20	11	12	4	28	30.8	30.6	30.7	138.6	138.6	138.6	59.5	59.5	59.5	15.9813	114	116	120	115	117	118	60	48	53	54	56.5	50.5	78	73	73	53
1357	KW	F	0	LE ROC	10	1	KAMPEMBA	2001-05-12	#NULL!	0	0	0	0		2		0	0	2014-05-20	13	13	4	28	37.7	37.7	37.7	143.3	143.3	143.3	64	64	64	18.359	122	129	114	125.5	118	121.5	78	66	59	72	68.5	62.5	92	87	80	71
1358	NN	M	1	LE ROC	10	1	KAMPEMBA	1998-07-30	3800	0	0	0	0		2		0	0	2014-05-20	15	15.9	5	28	46.9	46.9	46.9	160	160	160	66	66	66	18.3203	119	120	111	119.5	115	115.5	65	57	74	61	69.5	65.5	85	87	88	50
1359	IM	M	1	LE ROC	10	1	KAMPEMBA	2000-09-03	#NULL!	0	0	0	0		2		0	0	2014-05-20	13	13.9	4	28	34	34	34	140	140	140	61.5	61.5	61.5	17.3469	117	114	103	115.5	110	108.5	70	56	64	63	67	60	87	82	86	79
1360	NM	M	1	LE ROC	10	1	KAMPEMBA	2001-01-01	3200	0	0	0	0		2		1	1	2014-05-20	13	13.2	4	28	32	31.9	31.95	141.6	141.6	141.6	58.8	58.8	58.8	15.9347	114	102	110	108	112	106	62	59	52	60.5	57	55.5	80	77	72	71
1361	NW	M	1	LE ROC	10	1	KAMPEMBA	1997-08-16	4000	0	0	0	0		2		0	0	2014-05-20	16	16.9	5	28	54.9	54.9	54.9	159.8	159.9	159.85	73.5	73.5	73.5	21.4856	122	108	107	115	114.5	107.5	66	63	64	64.5	65	63.5	96	88	77	56
1362	NK	M	1	LE ROC	10	1	KAMPEMBA	2000-06-30	4000	0	0	0	0		2		0	0	2014-05-20	13	13.9	4	28	42.4	42.5	42.45	152.4	152.4	152.4	66.2	66.2	66.2	18.2771	90	96	94	93	92	95	57	56	56	56.5	56.5	56	67	70	70	86
1363	NW	F	0	LE ROC	10	1	KAMPEMBA	2001-04-04	#NULL!	0	0	0	0		2		0	0	2014-05-20	13	13.1	4	28	45.3	45.3	45.3	153.8	153.8	153.8	61.4	61.4	61.4	19.1507	124	118	118	121	121	118	61	75	69	68	65	72	94	93	91	111
1364	MM	F	0	LE ROC	10	1	KAMPEMBA	2000-01-12	3500	0	0	0	0		2		1	0	2014-05-20	14	14.1	5	28	50.9	50.9	50.9	162.4	162.4	162.4	71	71	71	19.2995	114	118	122	116	118	120	71	59	76	65	73.5	67.5	95	85	85	90
1365	MG	F	0	LE ROC	11	1	KAMPEMBA	2000-05-08	2000	0	0	0	0		2		0	0	2014-05-20	14	14	5	27	53.1	53.1	53.1	153	153	153	69.6	69.6	69.6	22.6836	131	120	116	125.5	123.5	118	101	66	69	83.5	85	67.5	108	91	89	94
1366	MK	M	1	LE ROC	11	1	KAMPEMBA	1997-08-18	4000	0	0	0	0		2		0	1	2014-05-20	16	16.9	5	27	63	63.1	63.05	176	176	176	72.2	72.2	72.2	20.3545	128	110	109	119	118.5	109.5	75	79	66	77	70.5	72.5	93	89	81	77
1367	KM	F	0	LE ROC	11	1	KAMPEMBA	1998-08-08	3800	0	0	0	0		2		0	0	2014-05-20	15	15.9	5	27	57.4	57.4	57.4	160.5	160.5	160.5	72.6	72.6	72.6	22.2824	130	130	120	130	125	125	73	70	75	71.5	74	72.5	93	96	95	107
1368	SR	M	1	LE ROC	11	1	KAMPEMBA	2001-09-29	5300	0	0	0	0		2		0	0	2014-05-20	12	12.9	4	27	38.5	38.6	38.55	145.1	145.1	145.1	63.1	63.1	63.1	18.3101	116	96	103	106	109.5	99.5	75	77	49	76	62	63	86	90	79	74
1369	MT	M	1	LE ROC	11	1	KAMPEMBA	1998-05-29	3800	0	0	0	0		2		1	0	2014-05-20	15	16	5	27	58.6	58.6	58.6	174.5	174.5	174.5	70.6	70.6	70.6	19.2445	117	111	108	114	112.5	109.5	63	71	58	67	60.5	64.5	83	84	76	58
1372	MF	M	1	LE ROC	12	1	KAMPEMBA	1998-08-01	3800	0	0	0	0		2		0	0	2014-05-20	15	16	5	27	43.3	43.2	43.25	149.8	149.8	149.8	67.4	67.4	67.4	19.2736	103	94	92	98.5	97.5	93	67	52	57	59.5	62	54.5	79	71	69	80
1373	OM	F	0	LE ROC	12	1	KAMPEMBA	1999-12-12	4000	0	0	0	0		2		0	1	2014-05-20	14	14.8	5	27	69.4	69.4	69.4	158.5	158.5	158.5	83	83	83	27.6249	122	121	123	121.5	122.5	122	76	74	70	75	73	72	98	97	92	89
1376	KM	F	0	LE ROC	12	1	KAMPEMBA	1999-02-19	#NULL!	0	0	0	0		2		0	1	2014-05-20	15	15.1	5	27	54	53.9	53.95	154.5	154.5	154.5	72.5	72.5	72.5	22.6014	128	130	129	129	128.5	129.5	58	71	67	64.5	62.5	69	84	94	88	93
1377	MM	M	1	LE ROC	12	1	KAMPEMBA	1997-06-15	3000	0	0	0	0		2		1	0	2014-05-20	16	17	5	26	54.2	54.2	54.2	160.3	160.3	160.3	71.5	71.5	71.5	21.0927	131	121	133	126	132	127	73	68	78	70.5	75.5	73	91	95	99	96
1378	LA	F	0	LE ROC	13	1	KAMPEMBA	1996-10-19	3800	0	0	0	0		2		0	0	2014-05-19	17	17.8	5	26	41.1	41.2	41.15	143.7	143.6	143.65	62.8	62.8	62.8	19.9415	119	113	114	116	116.5	113.5	85	80	78	82.5	81.5	79	101	97	96	88
1379	KB	F	0	LE ROC	13	1	KAMPEMBA	1997-09-27	#NULL!	0	0	0	0		2		0	0	2014-05-19	16	16.9	5	26	58.3	58.3	58.3	169.2	169.2	169.2	72.4	72.4	72.4	20.3642	115	111	110	113	112.5	110.5	60	66	62	63	61	64	78	83	87	67
1381	KC	M	1	LE ROC	13	1	KAMALONDO	1997-03-17	#NULL!	0	0	0	0		2		0	0	2014-05-19	17	17.1	5	23	59.1	59.2	59.15	175.6	175.6	175.6	71.2	71.2	71.2	19.1825	110	109	115	109.5	112.5	112	68	61	58	64.5	63	59.5	84	81	79	58
1382	MK	M	1	LE ROC	12	1	KAMPEMBA	1999-09-05	3500	0	0	0	0		2		0	0	2014-05-19	14	14.9	5	23	46	46.1	46.05	164	164	164	65	65	65	17.1215	136	144	131	140	133.5	137.5	72	53	59	62.5	65.5	56	91	71	87	84
1383	RM	M	1	LE ROC	12	1	LUBUMBASHI	1997-08-15	3000	0	0	0	0		2		0	0	2014-05-19	16	16.9	5	23	56	56	56	165.5	165.5	165.5	70.5	70.5	70.5	20.4452	97	101	101	99	99	101	81	56	54	68.5	67.5	55	87	75	71	67
1384	NM	M	1	LE ROC	12	1	KAMPEMBA	1997-05-01	#NULL!	0	0	0	0		2		0	0	2014-05-19	17	17	5	22	54.1	53.9	54	160.3	160.3	160.3	65.8	65.8	65.8	21.0149	125	125	119	125	122	122	73	66	67	69.5	70	66.5	95	90	85	61
1385	KM	F	0	LE ROC	12	1	KAMPEMBA	1997-10-10	3200	0	0	0	0		2		0	0	2014-05-19	16	16.9	5	22	46.3	46.3	46.3	152	152	152	62.3	62.3	62.3	20.0398	98	107	96	102.5	97	101.5	69	60	61	64.5	65	60.5	79	78	81	67
1386	SB	M	1	LE ROC	12	1	KAMPEMBA	1996-12-27	4000	0	0	0	0		2		0	0	2014-05-19	17	17.8	5	22	64.5	64.6	64.55	153	153	153	75.4	75.4	75.4	27.5749	110	117	115	113.5	112.5	116	76	66	69	71	72.5	67.5	88	85	83	71
1387	KM	F	0	LE ROC	12	1	KAMPEMBA	1997-04-30	3400	0	0	0	0		2		1	1	2014-05-19	17	17	5	22	61.3	61.3	61.3	161.5	161.5	161.5	72.5	72.5	72.5	23.5026	113	111	108	112	110.5	109.5	79	80	78	79.5	78.5	79	90	91	89	87
1388	MW	F	0	LE ROC	12	1	KAMPEMBA	1999-05-01	#NULL!	0	0	0	0		2		0	0	2014-05-19	15	15	5	22	53.7	53.8	53.75	152.8	152.8	152.8	73.2	73.2	73.2	23.0214	110	114	103	112	106.5	108.5	66	76	68	71	67	72	84	90	86	71
1389	IM	F	0	LE ROC	12	1	KAMPEMBA	1997-05-20	3000	0	0	0	0		2		0	1	2014-05-19	16	17	5	22	59.8	59.9	59.85	159.1	159.1	159.1	73	73	73	23.6442	113	120	108	116.5	110.5	114	63	48	58	55.5	60.5	53	83	72	81	61
1390	MK	M	1	LE ROC	12	1	KAMPEMBA	1999-10-29	5300	0	0	0	0		2		0	0	2014-05-19	14	14.8	5	22	53.4	53.4	53.4	166	166	166	66.1	66.1	66.1	19.3787	105	125	118	115	111.5	121.5	73	66	44	69.5	58.5	55	83	84	87	69
1393	KY	M	1	LE ROC	12	1	KAMPEMBA	2000-09-02	3800	0	0	0	0		2		1	1	2014-05-20	13	13.9	4	21	42.1	42	42.05	151.3	151.3	151.3	61	61	61	18.3691	109	103	104	106	106.5	103.5	68	63	62	65.5	65	62.5	84	78	79	60
1395	LN	M	1	LE ROC	12	1	KAMPEMBA	1998-03-01	3700	0	0	0	0		2		0	0	2014-05-19	16	16.1	5	20	52.8	52.7	52.75	161.6	161.6	161.6	70.8	70.8	70.8	20.1995	121	131	121	126	121	126	97	78	79	87.5	88	78.5	103	102	99	53
1396	KW	M	1	LE ROC	12	1	KAMPEMBA	1996-10-10	#NULL!	0	0	0	0		2		0	0	2014-05-19	17	17.9	5	20	56.2	56.2	56.2	172	172	172	73	73	73	18.9968	156	140	130	148	143	135	78	81	75	79.5	76.5	78	106	102	95	58
1397	NZ	F	0	LE ROC	12	1	KAMPEMBA	1998-01-12	3700	0	0	0	0		2		1	0	2014-05-19	16	16.1	5	20	71.6	71.6	71.6	164.3	164.3	164.3	81	81	81	26.5239	116	114	112	115	114	113	72	70	64	71	68	67	87	86	85	73
1398	AJ	F	0	LE ROC	11	1	KAMPEMBA	1997-06-12	#NULL!	0	0	0	0		2		1	1	2014-05-16	16	17	5	28	62.2	62.2	62.2	158	158	158	75	75	75	24.9159	121	114	119	117.5	120	116.5	74	84	71	79	72.5	77.5	94	96	90	63
1399	MM	F	0	LE ROC	13	1	KAMPEMBA	1999-07-08	#NULL!	0	0	0	0		2		0	0	2014-05-16	14	15	5	28	45.1	44.9	45	149.8	149.7	149.75	63.8	63.8	63.8	20.0668	125	113	98	119	111.5	105.5	76	69	65	72.5	70.5	67	96	85	81	96
1400	MB	F	0	LE ROC	11	1	KAMPEMBA	2000-02-22	3000	0	0	0	0		2		0	0	2014-05-16	14	14.1	5	28	43.6	43.6	43.6	156.9	156.9	156.9	58.5	58.4	58.45	17.7109	125	117	126	121	125.5	121.5	77	77	54	77	65.5	65.5	100	84	85	89
1401	KT	M	1	LE ROC	11	1	KAMPEMBA	2001-04-20	3500	0	0	0	0		2		1	0	2014-05-16	13	13	4	27	31.4	31.4	31.4	139.7	139.7	139.7	60.5	60.4	60.45	16.0893	108	105	128	106.5	118	116.5	68	65	52	66.5	60	58.5	82	80	77	86
1402	NM	M	1	LE ROC	11	1	KAMPEMBA	1999-08-27	2500	0	0	0	0		2		0	0	2014-05-16	14	14.9	5	27	35.5	35.5	35.5	143.5	143.5	143.5	61.4	61.4	61.4	17.2395	110	114	113	112	111.5	113.5	66	68	78	67	72	73	84	88	88	72
1403	YR	F	0	LE ROC	11	1	KAMPEMBA	2001-05-03	3900	0	0	0	0		2		0	0	2014-05-16	13	13	4	27	38.3	38.4	38.35	146.7	146.7	146.7	59	59	59	17.8199	127	116	117	121.5	122	116.5	74	66	81	70	77.5	73.5	105	86	96	95
1404	MK	F	0	LE ROC	11	1	KAMPEMBA	2000-02-04	#NULL!	0	0	0	0		2		0	0	2014-05-16	14	14.1	5	27	45.8	45.9	45.85	159	159	159	64.5	64.5	64.5	18.1361	132	123	126	127.5	129	124.5	69	69	70	69	69.5	69.5	97	95	95	101
1405	IS	M	1	LE ROC	11	1	KAMPEMBA	1999-06-01	2900	0	0	0	0		2		1	1	2014-05-16	14	15	5	27	40.5	40.5	40.5	153.5	153.5	153.5	61.5	61.5	61.5	17.1885	116	104	106	110	111	105	71	68	68	69.5	69.5	68	89	85	83	81
1406	KM	F	0	LE ROC	11	1	KAMPEMBA	2001-02-02	3800	0	0	0	0		2		0	0	2014-05-16	13	13.1	4	27	43.2	43.3	43.25	143	143	143	63.8	63.8	63.8	21.1502	120	112	110	116	115	111	69	59	81	64	75	70	85	81	90	80
1407	KN	M	1	LE ROC	11	1	KAMPEMBA	2000-05-21	3000	0	0	0	0		2		0	0	2014-05-16	13	14	5	27	33.3	33.3	33.3	139	139	139	60	60	60	17.2351	102	93	95	97.5	98.5	94	65	51	70	58	67.5	60.5	77	71	80	69
1408	KB	M	1	LE ROC	11	1	KAMPEMBA	1998-10-25	3300	0	0	0	0		2		0	0	2014-05-16	15	15.8	5	27	46.5	46.5	46.5	160.9	161	160.95	67	67	67	17.9503	138	131	129	134.5	133.5	130	70	72	69	71	69.5	70.5	110	104	99	75
1409	MM	M	1	LE ROC	11	1	KAMPEMBA	1998-06-21	4200	0	0	0	0		2		0	0	2014-05-16	15	16	5	27	57.3	57.2	57.25	167.3	167.3	167.3	68.1	68.1	68.1	20.4543	127	120	112	123.5	119.5	116	83	85	67	84	75	76	101	94	88	84
1410	CK	F	0	LE ROC	11	1	KAMPEMBA	1998-12-25	3500	0	0	0	0		2		0	0	2014-05-16	15	15.8	5	27	54.4	54.7	54.55	155.3	155.3	155.3	70.5	70.5	70.5	22.6179	119	106	113	112.5	116	109.5	71	69	67	70	69	68	89	84	86	73
1411	NE	F	0	LE ROC	11	1	KAMPEMBA	2000-05-21	#NULL!	0	0	0	0		2		0	0	2014-05-16	13	14	5	27	50.3	50.3	50.3	155.8	155.8	155.8	64	64	64	20.7221	126	115	113	120.5	119.5	114	68	82	67	75	67.5	74.5	89	105	85	70
1412	AB	M	1	LE ROC	11	1	KAMPEMBA	1997-11-28	3150	0	0	0	0		2		0	0	2014-05-16	16	16.8	5	28	47.1	47.1	47.1	161.2	161.2	161.2	63	63	63	18.1255	104	110	108	107	106	109	63	65	49	64	56	57	80	79	74	60
1413	TS	F	0	LE ROC	11	1	KAMPEMBA	1997-10-01	4200	0	0	0	0		2		0	1	2014-05-16	16	16.9	5	26	53.2	53.3	53.25	156.7	156.6	156.65	65.1	65.1	65.1	21.7	114	117	113	115.5	113.5	115	73	73	68	73	70.5	70.5	92	89	87	69
1414	NM	M	1	LE ROC	11	1	KAMPEMBA	1999-04-06	4200	0	0	0	0		2		0	0	2014-05-16	15	15.1	5	26	47.1	47.2	47.15	164.8	164.8	164.8	65.5	65.4	65.45	17.3607	104	115	111	109.5	107.5	113	69	74	69	71.5	69	71.5	85	92	88	66
1415	BI	F	0	LE ROC	11	1	KAMPEMBA	2000-06-15	3800	0	0	0	0		2		0	0	2014-05-16	13	14	5	24	57.9	58	57.95	162.7	162.7	162.7	70.3	70.3	70.3	21.8916	121	116	128	118.5	124.5	122	77	69	67	73	72	68	92	98	89	80
1416	KN	F	0	LE ROC	11	1	KAMPEMBA	2000-09-24	#NULL!	0	0	0	0		2		0	1	2014-05-16	13	13.9	4	24	49.6	49.4	49.5	149	149	149	67.4	67.4	67.4	22.2963	129	135	141	132	135	138	77	94	81	85.5	79	87.5	94	105	101	81
1417	MA	F	0	LE ROC	10	1	KAMPEMBA	1998-11-20	3000	0	0	0	0		2		0	0	2014-05-16	15	15.8	5	24	46.2	46.3	46.25	157	157	157	61.4	61.4	61.4	18.7634	137	135	137	136	137	136	72	74	65	73	68.5	69.5	100	98	99	86
1418	SK	M	1	LE ROC	10	1	KAMPEMBA	2001-09-19	3500	0	0	0	0		2		0	0	2014-05-16	12	12.9	4	23	38.2	38.2	38.2	143.5	143.5	143.5	61.5	61.4	61.45	18.5507	114	106	114	110	114	110	77	68	67	72.5	72	67.5	89	81	88	73
1419	KI	F	0	LE ROC	10	1	ANNEXE	1999-06-02	3100	0	0	0	0		2		0	0	2014-05-16	14	15	5	23	53.7	53.9	53.8	166.1	166.1	166.1	62.5	62.5	62.5	19.5004	162	147	156	154.5	159	151.5	76	76	83	76	79.5	79.5	106	105	112	90
1420	IB	F	0	LE ROC	10	1	KAMPEMBA	2001-04-01	2001	0	0	0	0		2		1	0	2014-05-16	13	13.1	4	23	37.1	37.2	37.15	153.5	153.5	153.5	56.5	56.5	56.5	15.7667	106	105	107	105.5	106.5	106	56	58	68	57	62	63	79	79	81	77
1421	YW	F	0	LE ROC	10	1	KAMPEMBA	2000-06-26	2500	0	0	0	0		2		0	0	2014-05-16	13	13.9	4	23	42.5	42.5	42.5	146.8	146.8	146.8	65.1	65.1	65.1	19.7214	132	118	111	125	121.5	114.5	69	70	69	69.5	69	69.5	89	91	85	80
1422	SK	F	0	LE ROC	10	1	KAMPEMBA	1999-11-14	4800	0	0	0	0		2		0	0	2014-05-16	14	14.8	5	23	60.9	60.7	60.8	163.9	163.9	163.9	71.2	71.1	71.15	22.6332	130	118	120	124	125	119	77	72	71	74.5	74	71.5	98	89	88	86
1423	MM	M	1	LE ROC	10	1	KAMPEMBA	1999-04-12	3380	0	0	0	0		2		0	1	2014-05-16	15	15	5	23	41.2	41.2	41.2	155.7	155.8	155.75	63.2	63.2	63.2	16.984	116	111	108	113.5	112	109.5	67	67	75	67	71	71	85	88	87	53
1424	LK	F	0	LE ROC	10	1	KAMPEMBA	1999-05-05	4300	0	0	0	0		2		0	0	2014-05-16	15	15	5	22	50.4	50.5	50.45	159.6	159.6	159.6	65.8	65.8	65.8	19.8059	102	107	112	104.5	107	109.5	67	70	70	68.5	68.5	70	81	84	87	78
1425	NN	F	0	LE ROC	10	1	KAMPEMBA	1997-05-30	2600	0	0	0	0		2		1	0	2014-05-16	16	17	5	22	56.6	56.6	56.6	166.7	166.7	166.7	71.4	71.3	71.35	20.3679	136	124	119	130	127.5	121.5	82	69	72	75.5	77	70.5	104	90	94	72
1426	KW	F	0	LE ROC	10	1	KAMPEMBA	1999-04-27	3300	0	0	0	0		2		0	0	2014-05-16	15	15	5	22	46.1	46.1	46.1	155.7	155.7	155.7	62.8	62.9	62.85	19.0162	126	124	117	125	121.5	120.5	76	66	67	71	71.5	66.5	92	82	85	66
1431	KM	M	1	LE ROC	14	1	KAMPEMBA	1997-06-26	2100	0	0	0	0		2		0	1	2014-05-20	16	17	5	24	41.9	42	41.95	155	155	155	64.5	64.5	64.5	17.461	110	100	103	105	106.5	101.5	61	66	69	63.5	65	67.5	78	77	82	73
1440	MK	M	1	LE ROC	14	1	KAMPEMBA	1996-10-03	3200	0	0	0	0		2		0	0	2014-05-20	17	17.9	5	22	57.9	57.9	57.9	175.5	175.5	175.5	72.5	72.5	72.5	18.7985	125	123	119	124	122	121	88	78	92	83	90	85	101	100	99	71
1441	ML	M	1	LE ROC	14	1	KAMPEMBA	1996-09-08	2700	0	0	0	0		2		0	0	2014-05-20	17	17.9	5	22	61	61.1	61.05	165.8	165.8	165.8	80.5	80.5	80.5	22.2084	146	145	122	145.5	134	133.5	73	53	75	63	74	64	98	85	90	46
1451	KN	F	0	LE ROC	14	1	KAMPEMBA	1996-11-28	3000	0	0	0	0		2		1	0	2014-05-20	17	17.8	5	21	61.5	61.6	61.55	172.9	172.9	172.9	76.7	76.7	76.7	20.5891	123	119	115	121	119	117	88	73	73	80.5	80.5	73	100	90	91	68
1454	LR	M	1	LE ROC	13	1	KAMPEMBA	1998-02-01	#NULL!	0	0	0	0		2		0	0	2014-05-20	16	16.1	5	22	59	59	59	174.8	174.8	174.8	69.5	69.5	69.5	19.3094	131	113	98	122	114.5	105.5	73	57	80	65	76.5	68.5	98	82	87	73
1456	KW	M	1	LE ROC	13	1	KAMPEMBA	1996-09-28	2800	0	0	0	0		2		0	0	2014-05-20	17	17.9	5	20	62.6	62.6	62.6	178.9	178.9	178.9	68	68	68	19.5593	117	123	118	120	117.5	120.5	83	86	65	84.5	74	75.5	96	98	88	59
1457	KI	F	0	LE ROC	13	1	KAMPEMBA	1998-10-15	2700	0	0	0	0		2		0	0	2014-05-20	15	15.9	5	20	42.2	42.2	42.2	155.4	155.4	155.4	67	67	67	17.4747	112	110	108	111	110	109	71	61	61	66	66	61	87	82	79	102
1458	MK	F	0	LE ROC	13	1	KAMPEMBA	1997-04-01	3800	0	0	0	0		2		0	0	2014-05-20	17	17.1	5	20	58.9	59	58.95	158	158	158	73.1	73	73.05	23.614	123	114	111	118.5	117	112.5	68	65	70	66.5	69	67.5	86	83	87	57
1460	SB	F	0	LE ROC	13	1	LUBUMBASHI	1997-07-02	3200	0	0	0	0		2		0	0	2014-05-20	16	17	5	19	46	46	46	151.7	151.7	151.7	62	62	62	19.9888	113	109	108	111	110.5	108.5	66	90	90	78	78	90	91	96	91	79
1461	KB	M	1	LE ROC	13	1	KAMPEMBA	1997-08-18	4400	0	0	0	0		2		0	1	2014-05-09	16	16.9	5	21	62.5	62.6	62.55	177.3	177.3	177.3	71	71	71	19.898	116	118	123	117	119.5	120.5	75	70	58	72.5	66.5	64	94	91	86	98
1465	KT	F	0	LE ROC	13	1	KAMPEMBA	2000-09-06	3000	0	0	0	0		2		1	0	2014-05-19	13	13.9	4	27	48.2	48.1	48.15	161.3	161.3	161.3	66	66	66	18.5066	114	120	115	117	114.5	117.5	66	53	70	59.5	68	61.5	78	66	60	71
1466	NS	M	1	LE ROC	13	1	KAMPEMBA	1998-05-09	3200	0	0	0	0		2		0	0	2014-05-19	16	16	5	27	61.6	61.7	61.65	169	169	169	72	72	72	21.5854	123	116	114	119.5	118.5	115	74	64	77	69	75.5	70.5	96	87	90	83
1467	ML	M	1	LE ROC	13	1	KAMPEMBA	1997-01-03	4200	0	0	0	0		2		0	0	2014-05-19	17	17.2	5	27	55.8	55.8	55.8	167.3	167.3	167.3	69.1	69.1	69.1	19.9362	89	101	105	95	97	103	50	61	51	55.5	50.5	56	63	76	78	78
1468	KT	F	0	LE ROC	13	1	KAMPEMBA	1996-12-05	#NULL!	0	0	0	0		2		0	0	2014-05-19	17	17.8	5	27	55.1	55.1	55.1	163.4	163.4	163.4	72	72	72	20.637	121	119	119	120	120	119	65	75	74	70	69.5	74.5	89	93	89	81
1472	TM	F	0	LE ROC	13	1	KAMPEMBA	1998-04-04	3200	0	0	0	0		2		0	0	2014-05-19	16	16.1	5	27	71.2	71.2	71.2	155.2	155.2	155.2	57	57	57	29.5595	129	120	123	124.5	126	121.5	87	77	81	82	84	79	97	86	93	84
1473	IK	F	0	LE ROC	13	1	KAMPEMBA	1998-10-11	3500	0	0	0	0		2		0	0	2014-05-19	15	15.9	5	27	56.1	56.1	56.1	162.7	162.7	162.7	69	69	69	21.1928	113	129	115	121	114	122	59	63	64	61	61.5	63.5	85	83	81	80
1475	OP	F	0	LE ROC	13	1	KAMPEMBA	1998-06-24	3450	0	0	0	0		2		0	0	2014-05-19	15	16	5	26	60.5	60.5	60.5	160.4	160.4	160.4	76.6	76.6	76.6	23.5151	155	120	112	137.5	133.5	116	84	70	68	77	76	69	100	89	89	77
1476	KS	F	0	LE ROC	13	1	KAMPEMBA	1996-10-03	2500	0	0	0	0		2		1	0	2014-05-22	17	17.9	5	26	52.7	52.6	52.65	147.6	147.6	147.6	66.8	66.8	66.8	24.1672	114	107	121	110.5	117.5	114	67	66	69	66.5	68	67.5	83	81	85	96
1477	NW	F	0	LE ROC	13	1	KAMPEMBA	1999-03-21	2800	0	0	0	0		2		0	0	2014-05-22	15	15.1	5	26	47.6	47.6	47.6	145.4	145.4	145.4	70.6	70.8	70.7	22.5153	104	107	112	105.5	108	109.5	67	58	67	62.5	67	62.5	82	81	88	83
1481	NK	F	0	LE ROC	12	1	KAMPEMBA	1999-11-17	#NULL!	0	0	0	0		2		0	0	2014-05-22	14	14.8	5	27	41.7	41.7	41.7	137.2	137	137.1	64.5	64.5	64.5	22.1851	138	143	132	140.5	135	137.5	74	79	73	76.5	73.5	76	104	101	101	105
1482	LM	F	0	LE ROC	10	1	KAMPEMBA	2001-06-06	5500	0	0	0	0		2		0	0	2014-05-22	12	13	4	27	47.3	47.3	47.3	142.4	142.4	142.4	67.4	67.4	67.4	23.326	112	114	118	113	115	116	73	76	71	74.5	72	73.5	88	88	88	83
1483	Jx	M	1	LE ROC	10	1	KAMPEMBA	2001-03-01	#NULL!	0	0	0	0		2		0	0	2014-05-22	13	13.1	4	27	34.5	34.6	34.55	135.5	135.5	135.5	64.2	64.2	64.2	18.8178	111	116	108	113.5	109.5	112	69	56	60	62.5	64.5	58	85	80	79	85
1484	MM	F	0	LE ROC	11	1	KAMPEMBA	2001-02-12	3500	0	0	0	0		2		0	0	2014-05-22	13	13.1	4	27	41	41.1	41.05	136.4	136.4	136.4	63.2	63.2	63.2	22.064	122	125	116	123.5	119	120.5	67	68	71	67.5	69	69.5	88	90	86	112
1485	MA	F	0	LE ROC	11	1	KAMPEMBA	1999-09-29	2500	0	0	0	0		2		0	0	2014-05-22	14	14.9	5	27	44.5	44.5	44.5	134	134	134	44.2	44.4	44.3	24.7828	132	126	135	129	133.5	130.5	67	71	64	69	65.5	67.5	91	89	95	99
1486	AM	M	1	LE ROC	10	1	KAMPEMBA	2000-02-02	4200	0	0	0	0		2		0	1	2014-05-22	14	14.1	5	27	43	43.1	43.05	146.2	146.2	146.2	65.3	65.4	65.35	20.1409	114	121	117	117.5	115.5	119	64	75	73	69.5	68.5	74	85	90	89	87
1487	MJ	M	1	LE ROC	12	1	LUBUMBASHI	1997-05-15	3300	0	0	0	0		2		0	0	2014-05-22	17	17	5	26	50.5	50.5	50.5	151.2	151	151.1	65.8	65.8	65.8	22.1188	117	113	118	115	117.5	115.5	66	63	45	64.5	55.5	54	84	80	79	70
1489	NM	F	0	LE ROC	15	1	KAMPEMBA	1998-03-06	2800	0	0	0	0		2		0	0	2014-05-22	16	16.1	5	21	46.5	46.5	46.5	149.5	149.4	149.45	66.5	66.5	66.5	20.8191	121	125	104	123	112.5	114.5	59	63	66	61	62.5	64.5	76	83	77	88
1501	NM	F	0	LE ROC	13	1	KAMPEMBA	1998-03-04	4000	0	0	0	0		2		0	1	2014-05-22	16	16.1	5	24	53.1	53	53.05	153.5	153.5	153.5	65.4	65.4	65.4	22.5148	133	130	122	131.5	127.5	126	71	65	63	68	67	64	91	94	87	77
1502	FM	F	0	LE ROC	13	1	KAMPEMBA	1997-05-22	4000	0	0	0	0		2		0	0	2014-05-22	17	17	5	23	72	72	72	150.1	150	150.05	81.5	81.4	81.45	31.9787	104	104	110	104	107	107	81	65	72	73	76.5	68.5	90	84	84	91
1503	NM	M	1	LE ROC	13	1	KAMPEMBA	1998-08-01	4200	0	0	0	0		2		0	0	2014-05-22	15	16	5	23	58.5	58.5	58.5	161.6	161.6	161.6	73.5	73.5	73.5	22.4013	127	119	113	123	120	116	74	86	68	80	71	77	98	100	85	60
1504	KM	F	0	LE ROC	15	1	KAMPEMBA	1996-12-28	3350	0	0	0	0		2		0	0	2014-05-22	17	17.8	5	20	55	55.1	55.05	150.5	150.5	150.5	70.5	70.5	70.5	24.3044	129	142	116	135.5	122.5	129	80	74	76	77	78	75	98	98	93	72
1508	SI	M	1	LE ROC	15	1	KAMPEMBA	1996-12-04	3500	0	0	0	0		2		0	0	2014-05-22	17	17.8	5	22	66.7	66.6	66.65	169	169	169	74.2	74.2	74.2	23.336	131	141	126	136	128.5	133.5	73	63	57	68	65	60	97	87	84	66
1509	NN	F	0	LE ROC	12	1	KAMPEMBA	1997-12-13	#NULL!	0	0	0	0		2		0	0	2014-05-23	16	16.8	5	20	54	54	54	140.4	140.4	140.4	73.2	73.2	73.2	27.3943	120	123	116	121.5	118	119.5	76	83	91	79.5	83.5	87	99	100	97	90
1510	MK	F	0	LE ROC	12	1	KAMPEMBA	1999-10-04	3500	0	0	0	0		2		1	1	2014-05-23	14	14.9	5	21	44.3	44.3	44.3	146.2	146.2	146.2	65.3	65.3	65.3	20.7257	119	115	108	117	113.5	111.5	63	68	59	65.5	61	63.5	90	84	81	89
1511	MK	M	1	LE ROC	12	1	KAMPEMBA	1998-10-04	3000	0	0	0	0		2		0	1	2014-05-23	15	15.9	5	21	40.2	40.3	40.25	142.7	142.7	142.7	65.8	65.8	65.8	19.766	120	123	122	121.5	121	122.5	80	71	81	75.5	80.5	76	95	98	98	59
1512	NK	M	1	LE ROC	13	1	KAMPEMBA	1998-02-20	3600	0	0	0	0		2		0	0	2014-05-23	16	16.1	5	20	51.3	51.4	51.35	157.8	157.8	157.8	69.4	69.4	69.4	20.6218	107	110	103	108.5	105	106.5	81	64	75	72.5	78	69.5	92	84	85	68
1513	NG	M	1	LE ROC	13	1	KAMPEMBA	1997-10-15	3500	0	0	0	0		2		0	1	2014-05-23	16	16.9	5	19	51.3	51.2	51.25	153.4	153.4	153.4	68.5	68.6	68.55	21.7793	135	138	126	136.5	130.5	132	78	81	82	79.5	80	81.5	108	98	101	84
1514	BD	M	1	LE ROC	13	1	KAMPEMBA	1996-09-20	3000	0	0	0	0		2		0	0	2014-05-23	17	17.9	5	20	62.9	62.9	62.9	166.4	166.4	166.4	72.6	72.4	72.5	22.7166	107	102	108	104.5	107.5	105	65	67	67	66	66	67	84	87	86	55
1515	NM	M	1	LE ROC	11	1	KAMPEMBA	1999-03-11	3200	0	0	0	0		2		0	0	2014-05-23	15	15.1	5	19	45.8	45.9	45.85	153.6	153.6	153.6	71.5	71.5	71.5	19.4338	133	114	111	123.5	122	112.5	53	68	81	60.5	67	74.5	93	86	92	62
1516	NB	F	0	LE ROC	11	1	KAMPEMBA	1999-01-07	#NULL!	0	0	0	0		2		1	1	2014-05-23	15	15.2	5	20	51.1	51.2	51.15	142.2	142.2	142.2	71.5	71.5	71.5	25.2957	109	118	122	113.5	115.5	120	79	74	66	76.5	72.5	70	91	88	88	65
1517	NM	M	1	LE ROC	12	1	KAMPEMBA	1997-05-17	#NULL!	0	0	0	0		2		0	0	2014-05-13	16	17	5	20	57.6	57.5	57.55	161	161	161	75.4	75.4	75.4	22.2021	125	125	122	125	123.5	123.5	80	82	83	81	81.5	82.5	96	98	99	73
1521	NW	M	1	LE ROC	12	1	KAMPEMBA	1997-06-10	#NULL!	0	0	0	0		2		0	0	2014-05-12	16	17	5	25	47	47	47	156.7	156.7	156.7	67.7	67.7	67.7	19.1408	120	118	102	119	111	110	56	59	58	57.5	57	58.5	76	80	76	83
1523	MW	M	1	LE ROC	12	1	KAMPEMBA	1996-11-19	#NULL!	0	0	0	0		2		1	1	2014-05-23	17	17.8	5	24	68.6	68.6	68.6	167.3	167.3	167.3	75.6	75.6	75.6	24.5094	134	136	117	135	125.5	126.5	60	60	67	60	63.5	63.5	95	96	80	79
1524	MM	M	1	LE ROC	12	1	KAMPEMBA	1998-01-12	#NULL!	0	0	0	0		2		0	0	2014-05-23	16	16.2	5	22	64.2	64.1	64.15	174	174	174	73.7	73.7	73.7	21.1884	129	117	112	123	120.5	114.5	74	78	65	76	69.5	71.5	94	93	88	70
1525	ML	F	0	LE ROC	12	1	KAMPEMBA	1998-11-22	4100	0	0	0	0		2		0	1	2014-05-23	15	15.8	5	23	62.1	62	62.05	143	143	143	82.7	82.7	82.7	30.3438	116	127	143	121.5	129.5	135	67	70	74	68.5	70.5	72	84	89	95	90
1526	IM	F	0	LE ROC	12	1	KAMPEMBA	1998-11-12	3500	0	0	0	0		2		0	0	2014-05-23	15	15.9	5	21	59.8	59.4	59.6	150.2	150.2	150.2	70.2	70.4	70.3	26.4184	144	155	150	149.5	147	152.5	84	83	90	83.5	87	86.5	108	110	108	110
1527	RK	M	1	LE ROC	12	1	KAMPEMBA	1997-09-02	#NULL!	0	0	0	0		2		0	0	2014-05-23	16	16.9	5	20	52.9	53	52.95	157	157	157	68.7	68.7	68.7	21.4816	154	169	150	161.5	152	159.5	95	93	97	94	96	95	118	113	113	69
1528	IK	F	0	LE ROC	12	1	KAMPEMBA	1997-05-01	#NULL!	0	0	0	0		2		0	1	2014-05-23	17	17.1	5	21	53.8	53.8	53.8	142.7	142.7	142.7	75.6	75.6	75.6	26.4201	115	113	113	114	114	113	78	65	63	71.5	70.5	64	94	82	76	78
1529	BK	F	0	LE BERGER	7	1	KAMPEMBA	2004-05-29	2400	0	0	0	0		2		0	0	2014-05-22	9	10	3	24	31	31	31	132.4	132.4	132.4	57.1	57	57.05	17.6842	116	107	111	111.5	113.5	109	78	76	80	77	79	78	88	85	86	79
1530	MK	M	1	LE BERGER	7	1	KAMPEMBA	2004-05-29	2300	0	0	0	0		2		0	0	2014-05-22	9	10	3	23	27.5	27.5	27.5	130	130	130	58.6	58.7	58.65	16.2722	107	100	101	103.5	104	100.5	60	65	61	62.5	60.5	63	80	78	81	100
1531	LP	F	0	LE BERGER	7	1	KAMPEMBA	2004-05-03	#NULL!	0	0	0	0		2		0	0	2014-05-22	10	10.1	3	28	16.7	16.7	16.7	110	110.1	110.05	50.9	51	50.95	13.7891	114	102	105	108	109.5	103.5	68	67	55	67.5	61.5	61	87	78	76	101
1532	MN	M	1	LE BERGER	7	1	KAMPEMBA	2005-07-29	#NULL!	0	0	0	0		2		0	0	2014-05-22	8	8.9	3	22	31.6	31.6	31.6	137.5	137.6	137.55	58.2	58	58.1	16.7019	95	105	99	100	97	102	65	64	56	64.5	60.5	60	73	77	71	79
1533	OL	M	1	LE BERGER	7	1	KAMPEMBA	2005-02-01	#NULL!	0	0	0	0		2		0	0	2014-05-22	9	9.1	3	27	27.9	27.9	27.9	130.4	130.5	130.45	56.1	56.2	56.15	16.3952	109	112	105	110.5	107	108.5	49	65	60	57	54.5	62.5	81	81	80	91
1534	MK	M	1	LE BERGER	7	1	KAMPEMBA	2004-06-12	#NULL!	0	0	0	0		2		1	1	2014-05-22	9	10	3	28	28.5	28.5	28.5	134.6	134.4	134.5	60.5	60.7	60.6	15.7543	102	98	98	100	100	98	60	55	58	57.5	59	56.5	74	73	73	76
1535	KN	F	0	LE BERGER	7	1	KAMPEMBA	2003-07-11	#NULL!	0	0	0	0		2		0	0	2014-04-22	10	10.9	3	28	34.2	34.2	34.2	142.4	142.4	142.4	59.5	59.3	59.4	16.8658	105	113	102	109	103.5	107.5	57	57	52	57	54.5	54.5	75	72	75	74
1536	SN	M	1	LE BERGER	7	1	KAMPEMBA	2004-10-01	#NULL!	0	0	0	0		2		0	0	2014-05-22	9	9.9	3	28	24.8	24.8	24.8	129.9	129.8	129.85	54.5	54.7	54.6	14.7085	113	110	106	111.5	109.5	108	63	68	62	65.5	62.5	65	83	81	81	86
1537	MM	F	0	LE BERGER	7	1	KAMPEMBA	2003-03-02	#NULL!	0	0	0	0		2		0	0	2014-02-22	10	11	4	28	26.5	26.5	26.5	139.1	139.9	139.5	57.1	56.9	57	13.6175	104	107	112	105.5	108	109.5	74	74	76	74	75	75	87	88	91	63
1538	TM	F	0	LE BERGER	7	1	KAMPEMBA	2005-07-22	#NULL!	0	0	0	0		2		0	0	2014-05-22	8	8.9	3	27	30.6	30.6	30.6	140.4	140.2	140.3	61.3	61.4	61.35	15.5455	106	112	97	109	101.5	104.5	67	68	69	67.5	68	68.5	85	85	82	79
1539	MD	F	0	LE BERGER	7	1	KAMPEMBA	2004-02-09	#NULL!	0	0	0	0		2		0	0	2014-05-22	10	10.1	3	27	25.1	25.1	25.1	134	133.9	133.95	55.1	55	55.05	13.9891	112	102	112	107	112	107	61	70	64	65.5	62.5	67	81	81	79	85
1540	NL	F	0	LE BERGER	7	1	KAMPEMBA	2005-10-01	#NULL!	0	0	0	0		2		0	0	2014-05-19	8	8.9	3	28	23	23	23	121.5	121.4	121.45	55	54.8	54.9	15.5931	108	112	108	110	108	110	69	68	65	68.5	67	66.5	84	81	80	68
1541	MM	M	1	LE BERGER	7	1	KAMPEMBA	2004-05-13	#NULL!	0	0	0	0		2		0	0	2014-05-22	10	10	3	27	35.7	35.7	35.7	135.9	135.7	135.8	63.3	63.2	63.25	19.3584	121	113	120	117	120.5	116.5	69	64	56	66.5	62.5	60	90	83	77	95
1542	MK	F	0	LE BERGER	7	1	KAMPEMBA	2005-08-31	3200	0	0	0	0		2		0	0	2014-05-22	8	8.9	3	27	23.1	23.1	23.1	127	126.9	126.95	53	53.2	53.1	14.3333	108	107	97	107.5	102.5	102	56	74	61	65	58.5	67.5	82	85	75	81
1543	ES	M	1	LE BERGER	7	1	KAMPEMBA	2005-06-06	2600	0	0	0	0		2		0	0	2014-05-19	8	9	3	27	30.6	30.6	30.6	135.2	135.1	135.15	61.5	61.3	61.4	16.7529	105	118	98	111.5	101.5	108	71	47	68	59	69.5	57.5	86	81	83	64
1544	TF	M	1	LE BERGER	7	1	KAMPEMBA	2005-12-24	#NULL!	0	0	0	0		2		0	0	2014-05-19	8	8.8	3	27	22.7	22.9	22.8	125.1	125	125.05	53.5	53.6	53.55	14.5803	120	126	124	123	122	125	76	69	65	72.5	70.5	67	96	89	87	98
1545	KG	F	0	LE BERGER	7	1	KAMPEMBA	2004-04-24	3500	0	0	0	0		2		0	0	2014-05-19	10	10	3	28	25.7	25.7	25.7	131.5	131.6	131.55	56	56.1	56.05	14.8509	91	119	93	105	92	106	70	67	51	68.5	60.5	59	76	86	72	86
1546	KN	M	1	LE BERGER	7	1	KAMPEMBA	2003-07-02	#NULL!	0	0	0	0		2		0	0	2014-05-19	10	11	4	28	31.3	31.3	31.3	147.2	147.1	147.15	60.5	60.5	60.5	14.4552	99	95	98	97	98.5	96.5	63	65	66	64	64.5	65.5	74	74	75	83
1547	SK	F	0	LE BERGER	7	1	KAMPEMBA	2004-04-25	#NULL!	0	0	0	0		2		0	0	2014-05-19	10	10	3	28	33.1	33.1	33.1	146.4	146.5	146.45	60.5	60.3	60.4	15.433	103	108	98	105.5	100.5	103	53	60	61	56.5	57	60.5	80	81	80	78
1548	KT	M	1	LE BERGER	7	1	KAMPEMBA	2005-02-11	#NULL!	0	0	0	0		2		0	0	2014-05-19	9	9.1	3	28	25.1	25.1	25.1	131.4	131.3	131.35	55.2	55.4	55.3	14.5483	112	97	101	104.5	106.5	99	53	38	41	45.5	47	39.5	75	64	64	64
1549	LN	F	0	LE BERGER	7	1	KAMPEMBA	2002-05-05	#NULL!	0	0	0	0		2		0	0	2014-05-19	12	12	4	28	35.6	35.6	35.6	149.4	149	149.2	60	60.1	60.05	15.9924	124	119	119	121.5	121.5	119	82	71	75	76.5	78.5	73	98	91	92	80
1550	MD	F	0	LE BERGER	7	1	KAMPEMBA	2004-07-17	#NULL!	0	0	0	0		2		0	0	2014-05-19	9	9.9	3	28	30	30.3	30.15	140.9	140.8	140.85	61.2	61.3	61.25	15.1976	108	105	106	106.5	107	105.5	79	63	63	71	71	63	88	82	82	66
1551	NS	F	0	LE BERGER	7	1	KAMPEMBA	2004-08-04	3500	0	0	0	0		2		0	1	2014-05-19	9	10	3	28	36.4	36.4	36.4	151.5	151.6	151.55	60.5	60.6	60.55	15.8485	98	98	103	98	100.5	100.5	55	45	54	50	54.5	49.5	70	65	74	118
1552	KA	F	0	LE BERGER	8	1	KAMPEMBA	2001-04-03	3000	0	0	0	0		2		0	0	2014-05-16	13	13.1	4	28	60.4	60.4	60.4	157.2	157.2	157.2	78	78	78	24.4417	107	116	117	111.5	112	116.5	88	65	64	76.5	76	64.5	98	87	87	59
1553	MK	M	1	LE BERGER	7	1	KAMPEMBA	2003-10-30	4200	0	0	0	0		2		0	0	2014-05-19	10	10.8	3	28	31.9	31.9	31.9	141.4	141.5	141.45	58.5	58.6	58.55	15.9435	102	106	108	104	105	107	62	67	72	64.5	67	69.5	78	86	92	75
1554	MK	M	1	LE BERGER	7	1	KAMPEMBA	2004-12-26	2300	0	0	0	0		2		0	0	2014-05-21	9	9.8	3	24	22.9	22.9	22.9	129.4	129.4	129.4	55.1	55.5	55.3	13.6762	100	94	97	97	98.5	95.5	61	64	70	62.5	65.5	67	73	80	81	76
1555	KM	F	0	LE BERGER	9	1	KAMPEMBA	2004-08-15	#NULL!	0	0	0	0		2		1	1	2014-05-15	9	9.9	3	24	42.2	42.2	42.2	149.2	149.4	149.3	68.2	68	68.1	18.9318	119	120	116	119.5	117.5	118	72	67	81	69.5	76.5	74	90	98	91	81
1556	IK	M	1	LE BERGER	7	1	KAMPEMBA	2004-01-13	4500	0	0	0	0		2		0	0	2014-05-21	10	10.1	3	24	31.6	31.6	31.6	127.9	127.8	127.85	63.3	63.3	63.3	19.3324	115	112	119	113.5	117	115.5	77	68	75	72.5	76	71.5	94	91	90	60
1557	SN	F	0	LE BERGER	7	1	KAMPEMBA	2004-07-21	#NULL!	0	0	0	0		2		0	0	2014-05-21	9	9.9	3	23	33.2	33.2	33.2	149.1	149	149.05	59.5	59.7	59.6	14.9442	112	110	108	111	110	109	83	74	70	78.5	76.5	72	94	94	88	82
1558	KN	F	0	LE BERGER	7	1	KAMPEMBA	2008-06-06	2500	0	0	0	0		2		0	0	2014-05-21	5	6	2	22	27.2	27.5	27.35	135.1	135.9	135.5	59.5	59.3	59.4	14.8963	112	108	112	110	112	110	71	71	74	71	72.5	72.5	89	85	88	89
1559	LM	F	0	LE BERGER	7	1	KAMPEMBA	2004-09-15	#NULL!	0	0	0	0		2		0	1	2014-05-21	9	9.9	3	23	52.4	52.4	52.4	143.8	144	143.9	75	74.9	74.95	25.3052	115	104	105	109.5	110	104.5	71	64	74	67.5	72.5	69	90	83	80	84
1560	KR	M	1	LE BERGER	7	1	KAMPEMBA	2002-08-15	#NULL!	0	0	0	0		2		0	0	2014-05-21	11	11.9	4	24	33.7	33.7	33.7	138.4	138.7	138.55	61.6	61.7	61.65	17.5556	94	102	100	98	97	101	61	61	59	61	60	60	77	78	75	71
1561	NM	M	1	LE BERGER	7	1	KAMPEMBA	2005-04-18	#NULL!	0	0	0	0		2		0	0	2014-05-21	9	9	3	24	26.2	26.2	26.2	124.2	124.1	124.15	57	57.1	57.05	16.9984	116	116	109	116	112.5	112.5	67	55	68	61	67.5	61.5	87	90	84	90
1562	JA	M	1	LE BERGER	7	1	KAMPEMBA	2006-01-22	3200	0	0	0	0		2		0	0	2014-05-21	8	8.1	3	24	24.4	24.4	24.4	131.9	131.8	131.85	54	54.3	54.15	14.0356	115	112	116	113.5	115.5	114	65	67	65	66	65	66	85	82	85	71
1563	KK	M	1	LE BERGER	7	1	KAMPEMBA	2004-04-11	2300	0	0	0	0		2		0	0	2014-05-22	10	10.1	3	27	24.7	24.7	24.7	135.4	135.2	135.3	55.6	55.8	55.7	13.4928	120	122	115	121	117.5	118.5	86	87	64	86.5	75	75.5	98	100	79	68
1564	MM	M	1	LE BERGER	7	1	KAMPEMBA	2004-03-29	3400	0	0	0	0		2		0	0	2014-05-22	10	10	3	27	25.2	25.2	25.2	130.9	130.9	130.9	54	54	54	14.7069	104	102	102	103	103	102	71	57	51	64	61	54	80	70	72	70
1565	ZM	F	0	LE BERGER	7	1	KAMPEMBA	2001-05-01	#NULL!	0	0	0	0		2		0	0	2014-05-22	13	13.1	4	27	32.3	32.3	32.3	141.4	141.4	141.4	61.2	61.8	61.5	16.1549	117	112	124	114.5	120.5	118	65	56	60	60.5	62.5	58	97	78	80	94
1566	BL	F	0	LE BERGER	7	1	KAMPEMBA	2004-09-28	#NULL!	0	0	0	0		2		0	0	2014-05-22	9	9.9	3	26	31.5	31.5	31.5	135.7	135.6	135.65	61.8	61.5	61.65	17.1187	120	112	118	116	119	115	68	68	56	68	62	62	89	84	79	86
1567	NK	M	1	LE BERGER	7	1	KAMPEMBA	2004-10-24	#NULL!	0	0	0	0		2		0	0	2014-05-22	9	9.8	3	29	32.5	32.5	32.5	133.2	133.2	133.2	59	59.1	59.05	18.3179	104	96	104	100	104	100	48	62	59	55	53.5	60.5	76	73	74	71
1568	KN	F	0	LE BERGER	7	1	KAMPEMBA	2004-03-13	#NULL!	0	0	0	0		2		0	0	2014-05-22	10	10.1	3	28	34	34	34	137.1	136.9	137	61.8	61.6	61.7	18.115	108	122	104	115	106	113	58	64	48	61	53	56	75	83	70	63
1569	NC	F	0	LE BERGER	7	1	KAMPEMBA	2004-06-06	#NULL!	0	0	0	0		2		0	0	2014-05-22	9	10	3	28	34	34	34	142.9	142.8	142.85	61	61.4	61.2	16.6617	117	105	99	111	108	102	72	69	61	70.5	66.5	65	87	80	82	82
1570	MR	F	0	LE BERGER	7	1	KAMPEMBA	2003-07-01	#NULL!	0	0	0	0		2		0	0	2014-05-22	10	11	4	27	32.1	32.1	32.1	133	132.8	132.9	62.7	62.6	62.65	18.1742	129	139	119	134	124	129	86	67	76	76.5	81	71.5	101	98	97	92
1571	LY	M	1	LE BERGER	7	1	KAMPEMBA	2003-11-30	#NULL!	0	0	0	0		2		0	0	2014-05-22	10	10.8	3	28	32.2	32.2	32.2	133.3	132.2	132.75	63	62	62.5	18.272	117	105	103	111	110	104	69	67	63	68	66	65	86	80	76	69
1572	KK	F	0	LE BERGER	6	1	KAMPEMBA	2006-04-01	3000	0	0	0	0		2		0	0	2014-05-14	8	8.1	3	27	23.7	23.7	23.7	122.5	122.4	122.45	52.4	52.4	52.4	15.8063	120	117	104	118.5	112	110.5	72	78	63	75	67.5	70.5	90	88	78	80
1573	KM	M	1	LE BERGER	6	1	KAMPEMBA	2006-11-24	3500	0	0	0	0		2		0	0	2014-05-14	7	7.8	3	27	23.2	23.2	23.2	121.7	121.6	121.65	56	56	56	15.677	110	117	122	113.5	116	119.5	66	62	61	64	63.5	61.5	90	88	85	96
1574	MM	F	0	LE BERGER	6	1	KAMPEMBA	2005-01-04	#NULL!	0	0	0	0		2		0	0	2014-05-14	9	9.1	3	27	26.6	26.6	26.6	127	126.9	126.95	57.5	57.5	57.5	16.505	103	117	111	110	107	114	67	67	71	67	69	69	87	84	91	92
1575	BM	M	1	LE BERGER	6	1	KAMPEMBA	2005-05-24	#NULL!	0	0	0	0		2		0	0	2014-05-16	8	9	3	29	28.1	28.1	28.1	131.7	131.6	131.65	59	58.9	58.95	16.213	102	110	102	106	102	106	59	56	59	57.5	59	57.5	76	80	78	86
1576	MM	M	1	LE BERGER	6	1	KAMPEMBA	2006-07-10	#NULL!	0	0	0	0		2		0	0	2014-05-14	7	8	3	27	22.3	22.3	22.3	123.1	123.1	123.1	52.6	52.6	52.6	14.716	98	100	96	99	97	98	59	59	63	59	61	61	81	82	77	78
1577	KK	M	1	LE BERGER	6	1	KAMPEMBA	2006-06-16	3500	0	0	0	0		2		0	0	2014-05-14	7	8	3	27	27	27	27	129.8	129.8	129.8	57.1	57.1	57.1	16.0256	100	107	113	103.5	106.5	110	64	61	62	62.5	63	61.5	78	81	77	82
1578	MM	M	1	LE BERGER	6	1	KAMPEMBA	2006-03-13	3500	0	0	0	0		2		0	0	2014-05-16	8	8.1	3	28	35	35	35	128.2	128	128.1	68.7	68.5	68.6	21.329	105	105	109	105	107	107	60	60	57	60	58.5	58.5	71	78	77	76
1579	KM	M	1	LE BERGER	6	1	KAMPEMBA	2005-07-30	3800	0	0	0	0		2		0	0	2014-05-14	8	8.9	3	27	23.3	23.3	23.3	125	124.9	124.95	54.1	54.2	54.15	14.9239	112	105	102	108.5	107	103.5	69	67	64	68	66.5	65.5	86	78	79	79
1580	KM	M	1	LE BERGER	6	1	KAMPEMBA	2005-01-01	#NULL!	0	0	0	0		2		0	0	2014-05-16	9	9.2	3	29	22.5	22.5	22.5	118.6	118.5	118.55	56	56	56	16.0096	92	89	89	90.5	90.5	89	48	55	48	51.5	48	51.5	69	66	72	85
1581	KS	F	0	LE BERGER	3	1	KAMPEMBA	2005-05-03	4000	0	0	0	0		2		0	0	2014-05-14	9	9	3	27	33.3	33.3	33.3	131.9	131.9	131.9	63.3	63.2	63.25	19.1406	106	112	114	109	110	113	69	78	71	73.5	70	74.5	83	89	84	87
1582	KC	F	0	LE BERGER	6	1	KAMPEMBA	2003-12-26	3500	0	0	0	0		2		0	0	2014-05-14	10	10.8	3	27	32.4	32.4	32.4	135.2	135.1	135.15	62	62	62	17.7383	137	126	122	131.5	129.5	124	84	87	92	85.5	88	89.5	105	93	99	106
1583	KE	M	1	LE BERGER	6	1	KAMPEMBA	2004-10-10	#NULL!	0	0	0	0		2		0	0	2014-05-14	9	9.9	3	26	23.6	23.6	23.6	124.4	124.4	124.4	55.5	55.5	55.5	15.25	112	118	114	115	113	116	84	70	79	77	81.5	74.5	93	90	94	79
1584	MN	F	0	LE BERGER	6	1	KAMPEMBA	2005-01-23	2500	0	0	0	0		2		0	0	2014-05-14	9	9.1	3	28	24.1	24.1	24.1	134	133.9	133.95	52.3	53	52.65	13.4317	97	104	111	100.5	104	107.5	61	66	51	63.5	56	58.5	77	79	73	93
1585	JZ	F	0	LE BERGER	6	1	KAMPEMBA	2006-02-12	#NULL!	0	0	0	0		2		0	0	2014-05-16	8	8.1	3	29	32	32	32	144.5	144.2	144.35	57.9	57.9	57.9	15.3574	135	119	124	127	129.5	121.5	79	87	87	83	83	87	103	98	93	97
1586	NE	F	0	LE BERGER	3	1	KAMPEMBA	2008-05-15	#NULL!	0	0	0	0		2		0	0	2014-05-14	5	6	2	28	19.7	19.7	19.7	125.7	125.7	125.7	51.3	51.3	51.3	12.468	103	96	121	99.5	112	108.5	66	52	73	59	69.5	62.5	80	68	94	93
1587	TM	M	1	LE BERGER	6	1	KAMPEMBA	2005-05-21	3500	0	0	0	0		2		0	0	2014-05-14	8	9	3	28	21	21	21	122	122	122	53	53	53	14.1091	107	111	100	109	103.5	105.5	67	68	59	67.5	63	63.5	81	84	74	90
1588	ZB	M	1	LE BERGER	6	1	KAMPEMBA	2006-11-29	3050	0	0	0	0		2		0	1	2014-05-14	7	7.8	3	28	24.7	24.7	24.7	126.5	126.4	126.45	57	57.1	57.05	15.4475	114	100	98	107	106	99	63	63	52	63	57.5	57.5	83	81	68	88
1589	TN	M	1	LE BERGER	6	1	KAMPEMBA	2004-05-10	#NULL!	0	0	0	0		2		0	0	2014-05-14	10	10	3	28	25.1	25.1	25.1	127.3	127.2	127.25	56.6	56.5	56.55	15.5009	86	98	94	92	90	96	43	44	40	43.5	41.5	42	71	68	61	105
1590	NL	F	0	LE BERGER	6	1	KAMPEMBA	2003-09-19	#NULL!	0	0	0	0		2		0	1	2014-05-14	10	10.9	3	28	27.8	27.8	27.8	135.2	135.1	135.15	55.5	55.5	55.5	15.2199	107	109	113	108	110	111	73	60	60	66.5	66.5	60	84	84	77	103
1591	TM	M	1	LE BERGER	6	1	KAMPEMBA	2005-10-10	#NULL!	0	0	0	0		2		0	0	2014-05-15	8	8.9	3	29	31.2	31.2	31.2	138.8	139	138.9	60	60	60	16.1715	106	105	106	105.5	106	105.5	67	67	68	67	67.5	67.5	82	86	80	89
1592	MT	M	1	LE BERGER	6	1	KAMPEMBA	2003-06-30	3200	0	0	0	0		2		0	0	2014-05-15	10	10.9	3	28	24.3	24.3	24.3	129.4	129.2	129.3	56.5	56.6	56.55	14.5348	111	104	106	107.5	108.5	105	72	63	68	67.5	70	65.5	90	78	83	90
1593	MM	M	1	LE BERGER	6	1	KAMPEMBA	2003-10-15	#NULL!	0	0	0	0		2		0	0	2014-05-15	10	10.9	3	29	25	25	25	133.5	133.4	133.45	56.9	56.7	56.8	14.0379	97	107	92	102	94.5	99.5	55	57	54	56	54.5	55.5	67	75	68	86
1594	KK	M	1	LE BERGER	6	1	KAMPEMBA	2006-04-01	#NULL!	0	0	0	0		2		0	0	2014-05-19	8	8.1	3	27	22.8	22.8	22.8	120.4	120.3	120.35	54.1	54.2	54.15	15.7414	102	101	97	101.5	99.5	99	71	69	68	70	69.5	68.5	83	78	80	95
1595	NK	F	0	LE BERGER	6	1	KAMPEMBA	2002-05-21	#NULL!	0	0	0	0		2		0	0	2014-05-19	11	12	4	27	32	32	32	145	145	145	58.5	58.5	58.5	15.22	96	94	92	95	94	93	57	62	58	59.5	57.5	60	74	76	73	70
1596	KM	F	0	LE BERGER	6	1	KAMPEMBA	2006-09-10	3600	0	0	0	0		2		0	0	2014-05-19	7	7.9	3	27	18	18	18	113.7	113.8	113.75	51	50.8	50.9	13.9114	114	107	104	110.5	109	105.5	72	66	61	69	66.5	63.5	87	80	81	91
1597	MF	F	0	LE BERGER	6	1	KAMPEMBA	2005-11-21	#NULL!	0	0	0	0		2		0	0	2014-05-19	8	8.8	3	27	23.2	23.2	23.2	123.8	123.7	123.75	55.2	55	55.1	15.1495	110	107	109	108.5	109.5	108	79	68	63	73.5	71	65.5	87	83	83	81
1598	MW	M	1	LE BERGER	6	1	KAMPEMBA	2004-08-11	3000	0	0	0	0		2		0	1	2014-05-19	9	9.9	3	27	31.7	31.7	31.7	140.5	140.4	140.45	61.1	61	61.05	16.07	117	114	116	115.5	116.5	115	73	80	74	76.5	73.5	77	90	95	89	77
1599	MM	F	0	LE BERGER	6	1	KAMPEMBA	2005-11-17	2600	0	0	0	0		2		0	0	2014-05-14	8	8.8	3	27	21.6	21.6	21.6	121.5	121.5	121.5	53.6	53.4	53.5	14.6319	98	104	109	101	103.5	106.5	60	73	77	66.5	68.5	75	78	87	88	79
1600	AK	F	0	LE BERGER	6	1	KAMPEMBA	2005-12-16	3500	0	0	0	0		2		0	0	2014-05-22	8	8.8	3	29	32.6	32.6	32.6	138.4	138.7	138.55	60.5	60.6	60.55	16.9826	94	102	100	98	97	101	60	62	60	61	60	61	79	80	79	72
1601	NB	M	1	LE BERGER	6	1	KAMPEMBA	2005-04-23	3200	0	0	0	0		2		0	1	2014-05-16	9	9	3	28	26.5	26.5	26.5	137.7	137.6	137.65	54.3	54.4	54.35	13.986	105	103	107	104	106	105	80	66	57	73	68.5	61.5	90	78	74	85
1602	MK	F	0	LE BERGER	6	1	KAMPEMBA	2005-05-28	3900	0	0	0	0		2		0	0	2014-05-22	8	9	3	29	20.1	20.1	20.1	123	123	123	50.1	50.3	50.2	13.2857	103	95	97	99	100	96	65	67	64	66	64.5	65.5	81	84	75	91
1603	MM	M	1	LE BERGER	6	1	KAMPEMBA	2005-04-11	3210	0	0	0	0		2		0	0	2014-05-22	9	9.1	3	28	24.4	24.4	24.4	123.5	123.4	123.45	56.7	56.6	56.65	16.0106	103	96	91	99.5	97	93.5	62	63	58	62.5	60	60.5	77	75	69	80
1604	MM	F	0	LE BERGER	5	1	KAMPEMBA	2005-12-14	#NULL!	0	0	0	0		2		0	0	2014-05-22	8	8.8	3	29	22.4	22.4	22.4	122.5	122.4	122.45	57.7	57.8	57.75	14.9393	113	111	113	112	113	112	78	79	75	78.5	76.5	77	94	93	88	101
1605	FM	F	0	LE BERGER	5	1	KAMPEMBA	2005-04-01	#NULL!	0	0	0	0		2		0	0	2014-05-22	9	9.1	3	29	17.3	17.3	17.3	112.6	112.5	112.55	50	50.1	50.05	13.657	115	102	106	108.5	110.5	104	67	65	60	66	63.5	62.5	89	80	79	79
1606	NB	M	1	LE BERGER	5	1	KAMPEMBA	2007-02-02	#NULL!	0	0	0	0		2		0	0	2014-05-22	7	7.1	3	29	21.8	21.8	21.8	117.5	117.4	117.45	54.6	54.7	54.65	15.8034	113	108	112	110.5	112.5	110	71	61	76	66	73.5	68.5	89	82	87	85
1607	SL	M	1	LE BERGER	5	1	KAMPEMBA	2007-06-14	#NULL!	0	0	0	0		2		0	0	2014-05-22	6	7	3	28	21	21	21	115	115	115	55	55.9	55.45	15.879	110	100	102	105	106	101	63	71	60	67	61.5	65.5	86	82	76	86
1608	NM	M	1	LE BERGER	5	1	KAMPEMBA	2007-02-03	#NULL!	0	0	0	0		2		0	0	2014-05-22	7	7.1	3	28	22.5	22.5	22.5	125.7	125.9	125.8	52.5	52.6	52.55	14.2174	116	110	113	113	114.5	111.5	61	71	58	66	59.5	64.5	87	83	82	89
1609	NK	F	0	LE BERGER	5	1	KAMPEMBA	2005-03-29	#NULL!	0	0	0	0		2		0	0	2014-05-22	9	9	3	28	23.6	23.6	23.6	122.6	122.5	122.55	54	54.2	54.1	15.714	115	111	109	113	112	110	80	60	61	70	70.5	60.5	91	78	81	106
1610	EL	M	1	LE BERGER	5	1	KAMPEMBA	2008-12-08	#NULL!	0	0	0	0		2		0	0	2014-05-22	5	5.8	2	29	23.1	23.1	23.1	122	121.9	121.95	56.5	56.8	56.65	15.5328	105	103	104	104	104.5	103.5	58	67	62	62.5	60	64.5	80	81	79	99
1611	LM	M	1	LE BERGER	5	1	KAMPEMBA	2007-07-15	2100	0	0	0	0		2		0	0	2014-05-22	6	7	3	29	21	21	21	120.3	120.2	120.25	52.3	52.4	52.35	14.5228	107	102	99	104.5	103	100.5	69	68	61	68.5	65	64.5	83	80	78	73
1612	AM	F	0	LE BERGER	5	1	KAMPEMBA	2007-02-07	3750	0	0	0	0		2		0	0	2014-05-13	7	7.1	3	27	21.9	21.9	21.9	123.5	123.5	123.5	55.4	55.2	55.3	14.3585	103	105	92	104	97.5	98.5	54	53	43	53.5	48.5	48	78	71	71	78
1613	OA	F	0	LE BERGER	5	1	KAMPEMBA	2004-02-17	2300	0	0	0	0		2		0	0	2014-05-14	10	10.1	3	27	24.5	24.5	24.5	130.2	130.1	130.15	54	54.9	54.45	14.4636	120	126	114	123	117	120	83	74	62	78.5	72.5	68	97	90	77	89
1614	KK	M	1	LE BERGER	5	1	KAMPEMBA	2006-05-05	#NULL!	0	0	0	0		2		0	0	2014-05-16	8	8	3	28	21.7	21.7	21.7	116.8	116.9	116.85	53	53.9	53.45	15.8929	109	111	102	110	105.5	106.5	66	66	55	66	60.5	60.5	82	81	73	93
1615	KJ	M	1	LE BERGER	5	1	KAMPEMBA	2007-07-26	3100	0	0	0	0		2		0	0	2014-05-16	6	6.9	2	28	20.4	20.4	20.4	114.5	114.3	114.4	54	54.1	54.05	15.5876	97	98	98	97.5	97.5	98	56	57	56	56.5	56	56.5	73	76	73	89
1616	KM	M	1	LE BERGER	5	1	KAMPEMBA	2005-12-25	#NULL!	0	0	0	0		2		0	0	2014-05-16	8	8.8	3	28	21.9	21.9	21.9	121.7	121.6	121.65	55	55	55	14.7986	100	91	96	95.5	98	93.5	51	54	61	52.5	56	57.5	68	73	76	78
1617	BF	M	1	LE BERGER	5	1	KAMPEMBA	2006-02-01	3800	0	0	0	0		2		0	0	2014-05-19	8	8.1	3	27	21.5	21.5	21.5	121.7	121.8	121.75	51.5	51.4	51.45	14.5044	116	119	110	117.5	113	114.5	72	68	79	70	75.5	73.5	87	99	86	72
1618	MB	F	0	LE BERGER	5	1	KAMPEMBA	2007-10-07	3500	0	0	0	0		2		0	0	2014-05-19	6	6.9	2	27	19.7	19.9	19.8	123.2	122.9	123.05	51.9	51.8	51.85	13.0768	109	103	102	106	105.5	102.5	78	70	64	74	71	67	88	85	75	89
1619	KN	F	0	LE BERGER	5	1	KAMPEMBA	2005-05-08	#NULL!	0	0	0	0		2		0	0	2014-05-13	9	9	3	28	18.9	18.9	18.9	113.3	113.3	113.3	54.5	54.5	54.5	14.7232	98	109	115	103.5	106.5	112	68	69	60	68.5	64	64.5	80	88	80	103
1620	SD	M	1	LE BERGER	5	1	KAMPEMBA	2006-01-12	#NULL!	0	0	0	0		2		0	0	2014-05-19	8	8.1	3	28	25.5	25.5	25.5	125.6	125.6	125.6	56.8	56.7	56.75	16.1644	94	107	102	100.5	98	104.5	57	68	61	62.5	59	64.5	81	82	79	86
1621	KK	M	1	LE BERGER	5	1	KAMPEMBA	2006-06-16	3800	0	0	0	0		2		0	0	2014-05-19	7	8	3	27	24	24	24	123.4	123.4	123.4	54.5	54.4	54.45	15.7609	110	111	110	110.5	110	110.5	65	67	70	66	67.5	68.5	89	85	82	77
1622	TL	M	1	LE BERGER	5	1	KAMPEMBA	2004-09-30	#NULL!	0	0	0	0		2		0	0	2014-05-19	9	9.8	3	28	23	23	23	122.3	122.2	122.25	59	59	59	15.3897	121	131	121	126	121	126	76	80	71	78	73.5	75.5	95	94	86	82
1623	IT	M	1	LE BERGER	5	1	KAMPEMBA	2006-07-23	3500	0	0	0	0		2		0	1	2014-05-13	7	7.9	3	23	24.8	24.8	24.8	123.3	123.5	123.4	57	57.2	57.1	16.2863	121	120	115	120.5	118	117.5	76	79	76	77.5	76	77.5	95	90	92	86
1624	KV	M	1	LE BERGER	5	1	KAMPEMBA	2006-03-02	#NULL!	0	0	0	0		2		0	0	2014-05-13	8	8.1	3	27	20.3	20.3	20.3	118.3	118.4	118.35	55	55	55	14.493	100	96	102	98	101	99	63	64	62	63.5	62.5	63	76	75	75	87
1625	IN	F	0	LE BERGER	5	1	KAMPEMBA	2007-07-04	3800	0	0	0	0		2		0	0	2014-05-13	6	7	3	27	18.9	18.9	18.9	114.2	144.1	129.15	50	50.2	50.1	11.3311	101	107	105	104	103	106	74	72	65	73	69.5	68.5	82	88	85	87
1626	SM	F	0	LE BERGER	5	1	KAMPEMBA	2006-10-09	5300	0	0	0	0		2		0	0	2014-05-13	7	7.9	3	28	20.5	20.5	20.5	115.1	115	115.05	53.5	53.5	53.5	15.4875	118	114	109	116	113.5	111.5	67	71	64	69	65.5	67.5	88	90	80	96
1627	AD	M	1	LE BERGER	5	1	KAMPEMBA	2005-11-11	#NULL!	0	0	0	0		2		0	1	2014-05-13	8	8.8	3	26	23.5	23.5	23.5	127.9	127.8	127.85	57.5	57.4	57.45	14.3769	104	105	106	104.5	105	105.5	72	75	67	73.5	69.5	71	82	83	80	68
1628	KE	M	1	LE BERGER	5	1	KAMPEMBA	2006-07-18	#NULL!	0	0	0	0		2		0	0	2014-05-13	7	7.9	3	28	21.9	21.9	21.9	126.4	126.3	126.35	53.5	53.5	53.5	13.7181	91	100	99	95.5	95	99.5	53	55	59	54	56	57	70	73	74	67
1629	KP	M	1	LE BERGER	5	1	KAMPEMBA	2006-05-25	3500	0	0	0	0		2		0	0	2014-05-13	7	8	3	27	21.2	21.2	21.2	120.3	120.3	120.3	57.2	57.4	57.3	14.6489	107	109	104	108	105.5	106.5	72	67	67	69.5	69.5	67	83	86	81	96
1630	AA	M	1	LE BERGER	5	1	KAMPEMBA	2004-06-02	#NULL!	0	0	0	0		2		0	0	2014-05-12	9	10	3	28	22.7	22.7	22.7	127.6	127.4	127.5	53.7	53.5	53.6	13.9639	113	114	102	113.5	107.5	108	78	77	69	77.5	73.5	73	94	90	78	81
1631	MM	M	1	LE BERGER	5	1	KAMPEMBA	2007-01-01	2900	0	0	0	0		2		0	0	2014-05-14	7	7.2	3	27	21	21	21	116.4	116.4	116.4	56.2	56.2	56.2	15.4993	120	119	102	119.5	111	110.5	80	67	52	73.5	66	59.5	97	94	77	129
1632	BL	F	0	LE BERGER	5	1	KAMPEMBA	2006-08-20	#NULL!	0	0	0	0		2		0	0	2014-05-14	7	7.9	3	27	28	28	28	130	130.1	130.05	59.1	59	59.05	16.5553	109	117	109	113	109	113	70	62	60	66	65	61	83	85	90	69
1633	AR	F	0	LE BERGER	5	1	KAMPEMBA	2005-03-20	3200	0	0	0	0		2		0	0	2014-05-14	9	9	3	27	29.4	30.1	29.75	132.3	132.2	132.25	60	60.1	60.05	17.0097	118	118	120	118	119	119	71	86	71	78.5	71	78.5	95	101	89	88
1634	KD	F	0	LE BERGER	5	1	KAMPEMBA	2006-11-27	3000	0	0	0	0		2		0	0	2014-04-19	7	7.8	3	27	25.1	25.1	25.1	122.9	122.8	122.85	64.3	64	64.15	16.6312	102	95	100	98.5	101	97.5	65	63	64	64	64.5	63.5	76	72	77	89
1635	SM	F	0	LE BERGER	5	1	KAMPEMBA	2007-10-04	#NULL!	0	0	0	0		2		0	0	2014-05-19	6	6.9	2	27	18.8	18.8	18.8	115	115	115	51.5	51.1	51.3	14.2155	115	106	107	110.5	111	106.5	63	60	71	61.5	67	65.5	82	79	82	96
1636	KK	M	1	LE BERGER	5	1	KAMPEMBA	2003-06-17	3100	0	0	0	0		2		0	0	2014-04-19	10	10.9	3	23	28.5	28.5	28.5	137	137	137	58	57.5	57.75	15.1846	127	127	124	127	125.5	125.5	67	68	63	67.5	65	65.5	93	84	84	104
1637	YM	M	1	LE BERGER	5	1	KAMPEMBA	2007-08-26	3200	0	0	0	0		2		0	0	2014-05-19	6	6.9	2	23	22.4	22.4	22.4	123.5	123.6	123.55	54.7	54.6	54.65	14.6745	96	101	102	98.5	99	101.5	63	76	75	69.5	69	75.5	77	85	82	82
1638	KM	F	0	LE BERGER	5	1	KAMPEMBA	2005-03-06	#NULL!	0	0	0	0		2		0	0	2014-05-19	9	9.1	3	27	26.9	26.9	26.9	127.3	127.8	127.55	57.9	58.3	58.1	16.5345	98	111	97	104.5	97.5	104	58	57	51	57.5	54.5	54	72	76	73	88
1639	ND	M	1	LE BERGER	5	1	KAMPEMBA	2007-03-13	4000	0	0	0	0		2		0	0	2014-05-13	7	7.1	3	27	22.7	22.7	22.7	121	121	121	58.2	58.3	58.25	15.5044	107	109	111	108	109	110	61	61	63	61	62	62	82	78	80	68
1640	AP	F	0	LE BERGER	5	1	KAMPEMBA	2006-05-18	#NULL!	0	0	0	0		2		0	0	2014-05-13	7	8	3	27	26.9	26.9	26.9	127.9	127.9	127.9	58.8	58.9	58.85	16.4441	112	108	103	110	107.5	105.5	73	71	69	72	71	70	90	88	82	84
1641	KK	M	1	LE BERGER	5	1	KAMPEMBA	2006-06-21	#NULL!	0	0	0	0		2		0	0	2014-05-10	7	7.9	3	30	19.9	19.9	19.9	120.6	120.6	120.6	51.5	51.6	51.55	13.6823	116	109	106	112.5	111	107.5	67	65	71	66	69	68	86	83	85	93
1642	NM	M	1	LE BERGER	5	1	KAMPEMBA	2006-08-02	#NULL!	0	0	0	0		2		0	0	2014-05-19	7	8	3	24	27.4	27.4	27.4	132.3	132.2	132.25	56.4	56.5	56.45	15.666	120	117	120	118.5	120	118.5	84	76	78	80	81	77	99	94	92	65
1643	NW	M	1	LE BERGER	5	1	KAMPEMBA	2007-07-06	3600	0	0	0	0		2		0	1	2014-05-19	6	7	3	26	23.1	23.1	23.1	132.7	132.5	132.6	57.1	57.3	57.2	13.1379	124	122	120	123	122	121	75	76	79	75.5	77	77.5	98	96	95	97
1644	AA	M	1	LE BERGER	5	1	KAMPEMBA	2007-01-25	#NULL!	0	0	0	0		2		0	1	2014-05-19	7	7.1	3	26	26.9	26.9	26.9	129.1	129.2	129.15	59.5	59.7	59.6	16.1274	105	105	103	105	104	104	63	57	56	60	59.5	56.5	79	75	76	91
1645	KK	M	1	LE BERGER	5	1	KAMPEMBA	2007-01-06	3800	0	0	0	0		2		0	0	2014-05-12	7	7.1	3	29	21.6	21.6	21.6	118.3	118.2	118.25	52	52.3	52.15	15.4473	96	104	105	100	100.5	104.5	60	53	69	56.5	64.5	61	73	73	77	72
1646	NK	M	1	LE BERGER	5	1	KAMPEMBA	2008-02-13	3000	0	0	0	0		2		0	0	2014-05-12	6	6.1	2	28	20.7	20.7	20.7	118.1	118.2	118.15	55	55	55	14.8287	102	107	107	104.5	104.5	107	60	64	63	62	61.5	63.5	79	80	83	86
1647	KM	M	1	LE BERGER	5	1	KAMPEMBA	2007-04-01	2900	0	0	0	0		2		0	0	2014-05-12	7	7.1	3	28	21.2	21.5	21.35	115	114.5	114.75	54	54.2	54.1	16.2141	119	121	110	120	114.5	115.5	68	69	68	68.5	68	68.5	93	89	83	85
1648	KN	F	0	LE BERGER	5	1	KAMPEMBA	2007-01-04	#NULL!	0	0	0	0		2		0	0	2014-05-13	7	7.1	3	27	21.9	21.9	21.9	121.3	121.2	121.25	53.5	53.4	53.45	14.8964	109	119	119	114	114	119	69	66	76	67.5	72.5	71	85	85	89	103
1649	NN	M	1	LE BERGER	5	1	KAMPEMBA	2004-09-08	#NULL!	0	0	0	0		2		0	0	2014-05-13	9	9.9	3	27	18.4	18.4	18.4	112.9	112.9	112.9	52.4	52.2	52.3	14.4354	100	100	99	100	99.5	99.5	55	61	59	58	57	60	77	75	76	84
1650	MM	M	1	LE BERGER	5	1	KAMPEMBA	2005-11-21	#NULL!	0	0	0	0		2		0	0	2014-05-13	8	8.8	3	28	18.4	18.4	18.4	119	119	119	49.5	49.6	49.55	12.9934	88	95	90	91.5	89	92.5	60	68	63	64	61.5	65.5	79	77	70	91
1651	MS	F	0	LE BERGER	5	1	KAMPEMBA	2007-06-10	4500	0	0	0	0		2		0	0	2014-05-13	6	7	3	28	22.7	22.7	22.7	121.1	121	121.05	54	54	54	15.4916	117	104	107	110.5	112	105.5	71	52	67	61.5	69	59.5	86	74	77	98
1652	KK	F	0	LE BERGER	5	1	KAMPEMBA	2007-05-29	#NULL!	0	0	0	0		2		0	0	2014-05-13	6	7	3	28	20.3	20.3	20.3	116.8	116.8	116.8	52.7	52.6	52.65	14.8803	126	121	119	123.5	122.5	120	89	71	70	80	79.5	70.5	102	91	88	84
1653	KT	F	0	LE BERGER	5	1	KAMPEMBA	2007-11-20	3800	0	0	0	0		2		0	0	2014-05-13	6	6.8	2	28	19.3	19.3	19.3	114	113.9	113.95	49	49.2	49.1	14.8638	117	123	112	120	114.5	117.5	79	73	62	76	70.5	67.5	92	95	76	117
1654	KK	F	0	LE BERGER	5	1	KAMPEMBA	2007-10-07	3200	0	0	0	0		2		1	0	2014-05-13	6	6.9	2	28	19.5	19.5	19.5	112.5	112.3	112.4	54.5	54.6	54.55	15.4348	98	92	94	95	96	93	62	59	78	60.5	70	68.5	75	73	82	86
1655	NK	M	1	LE BERGER	5	1	KAMPEMBA	2007-05-13	#NULL!	0	0	0	0		2		0	0	2014-05-12	6	7	3	28	22	22	22	119.4	119.1	119.25	54.8	55	54.9	15.4706	96	95	96	95.5	96	95.5	69	50	50	59.5	59.5	50	80	71	67	84
1656	MB	F	0	LE BERGER	5	1	KAMPEMBA	2004-02-24	#NULL!	0	0	0	0		2		0	0	2014-05-14	10	10.1	3	28	27.5	27.5	27.5	130.7	130.7	130.7	57	57	57	16.0984	116	120	120	118	118	120	91	63	69	77	80	66	98	84	86	100
1657	KV	M	1	LE BERGER	5	1	KAMPEMBA	2005-07-26	#NULL!	0	0	0	0		2		0	0	2014-05-14	8	8.9	3	28	17.6	17.6	17.6	111.2	111.3	111.25	52.5	52.6	52.55	14.2204	106	95	92	100.5	99	93.5	61	64	59	62.5	60	61.5	87	73	76	101
1658	MO	M	1	LE BERGER	5	1	KAMPEMBA	2006-02-12	#NULL!	0	0	0	0		2		0	0	2014-05-15	8	8.1	3	31	19.6	19.6	19.6	112.4	112.4	112.4	52.5	52.4	52.45	15.514	94	87	87	90.5	90.5	87	49	64	63	56.5	56	63.5	68	72	82	95
1659	KM	F	0	LE BERGER	5	1	KAMPEMBA	2005-10-30	3800	0	0	0	0		2		1	1	2014-05-19	8	8.8	3	23	19.8	19.8	19.8	123	122.8	122.9	52.1	52.8	52.45	13.1088	105	98	103	101.5	104	100.5	61	70	50	65.5	55.5	60	83	79	74	80
1660	KS	F	0	LE BERGER	5	1	KAMPEMBA	2004-05-20	3100	0	0	0	0		2		0	0	2014-05-22	10	10	3	28	21.9	21.9	21.9	122.4	122.3	122.35	51.2	51.2	51.2	14.6297	93	100	99	96.5	96	99.5	61	54	67	57.5	64	60.5	75	74	82	75
1661	TM	M	1	LE BERGER	5	1	KAMPEMBA	2005-04-03	#NULL!	0	0	0	0		2		1	0	2014-05-22	9	9.1	3	28	34.2	34.2	34.2	141.4	141.6	141.5	63.6	63.8	63.7	17.081	116	122	124	119	120	123	78	73	75	75.5	76.5	74	97	89	90	87
1662	MK	M	1	LE BERGER	5	1	KAMPEMBA	2006-01-09	3100	0	0	0	0		2		0	1	2014-05-22	8	8.2	3	28	25	25	25	131.6	131.4	131.5	58.5	58.3	58.4	14.4573	113	106	101	109.5	107	103.5	67	68	55	67.5	61	61.5	90	78	73	116
1663	MM	F	0	LE BERGER	5	1	KAMPEMBA	2005-07-01	2800	0	0	0	0		2		0	0	2014-05-22	8	9	3	28	21.7	21.7	21.7	119.6	119.5	119.55	56.5	56.4	56.45	15.1831	117	107	116	112	116.5	111.5	67	65	88	66	77.5	76.5	91	83	95	79
1664	KU	M	1	LE BERGER	5	1	KAMPEMBA	2007-03-19	#NULL!	0	0	0	0		2		0	0	2014-05-21	7	7.1	3	20	20.8	20.8	20.8	121.7	121.6	121.65	53.4	53.5	53.45	14.0553	103	100	100	101.5	101.5	100	55	45	36	50	45.5	40.5	75	66	65	73
1665	TT	F	0	LE BERGER	5	1	KAMPEMBA	2006-01-01	2800	0	0	0	0		2		0	0	2014-05-21	8	8.2	3	20	24.9	24.9	24.9	125.7	125.6	125.65	56.5	56.2	56.35	15.7715	104	96	102	100	103	99	64	59	69	61.5	66.5	64	76	79	80	85
1666	MK	F	0	LE BERGER	5	1	KAMPEMBA	2005-12-04	#NULL!	0	0	0	0		2		0	0	2014-05-22	8	8.8	3	28	19.5	19.5	19.5	119.4	119.2	119.3	49.2	49.3	49.25	13.701	89	83	86	86	87.5	84.5	65	57	48	61	56.5	52.5	74	67	63	90
1667	NK	F	0	LE BERGER	5	1	KAMPEMBA	2006-12-24	3650	0	0	0	0		2		0	0	2014-05-22	7	7.8	3	28	18	18	18	114.1	114.3	114.2	49.6	49.7	49.65	13.8019	124	102	97	113	110.5	99.5	69	68	69	68.5	69	68.5	86	80	82	93
1668	MM	F	0	LE BERGER	5	1	KAMPEMBA	2006-04-19	#NULL!	0	0	0	0		2		0	0	2014-05-22	8	8	3	30	21.9	21.9	21.9	122	122.4	122.2	53	53.1	53.05	14.6657	112	101	109	106.5	110.5	105	59	71	71	65	65	71	78	83	84	108
1669	MI	F	0	LE BERGER	5	1	KAMPEMBA	2007-09-03	#NULL!	0	0	0	0		2		0	0	2014-05-21	6	6.9	2	26	19.1	19.1	19.1	112.4	122	117.2	53.2	53.4	53.3	13.9052	100	103	99	101.5	99.5	101	63	66	58	64.5	60.5	62	78	78	75	94
1670	SM	M	1	LE BERGER	5	1	KAMPEMBA	2008-11-20	3200	0	0	0	0		2		0	0	2014-05-22	5	5.8	2	28	20	20	20	116.9	116.8	116.85	54	54.9	54.45	14.6478	98	98	95	98	96.5	96.5	55	58	71	56.5	63	64.5	73	75	80	80
1671	NK	M	1	LE BERGER	5	1	KAMPEMBA	2005-05-17	#NULL!	0	0	0	0		2		0	0	2014-05-22	9	9	3	28	20.7	20.7	20.7	118.6	118.7	118.65	53.4	53.6	53.5	14.704	95	91	98	93	96.5	94.5	71	61	68	66	69.5	64.5	80	74	80	81
1672	LN	F	0	LE BERGER	5	1	KAMPEMBA	2004-06-16	3000	0	0	0	0		2		0	0	2014-05-21	9	10	3	27	22.3	22.3	22.3	122.8	122.7	122.75	54.8	54.6	54.7	14.8	119	108	105	113.5	112	106.5	72	67	81	69.5	76.5	74	87	85	88	96
1673	KJ	M	1	LE BERGER	5	1	KAMPEMBA	2005-09-09	3500	0	0	0	0		2		0	0	2014-05-21	8	8.9	3	27	24.8	24.8	24.8	128.9	128.8	128.85	53.9	53.2	53.55	14.9377	109	105	114	107	111.5	109.5	59	72	63	65.5	61	67.5	79	88	80	112
1674	MA	M	1	LE BERGER	5	1	KAMPEMBA	2005-07-13	2800	0	0	0	0		2		0	0	2014-05-21	8	9	3	27	21.4	21.4	21.4	120.2	120.1	120.15	53.2	53.6	53.4	14.824	98	93	99	95.5	98.5	96	59	60	68	59.5	63.5	64	77	70	78	83
1675	AP	F	0	LE BERGER	5	1	KAMPEMBA	2007-10-27	3800	0	0	0	0		2		0	0	2014-05-21	6	6.8	2	27	23.3	23.3	23.3	125	124.9	124.95	55.8	56	55.9	14.9239	105	103	92	104	98.5	97.5	53	64	62	58.5	57.5	63	70	75	74	94
1676	RM	F	0	LE BERGER	5	1	KAMPEMBA	2007-08-01	#NULL!	0	0	0	0		2		0	0	2014-05-21	6	7	3	27	23.4	23.4	23.4	130.6	130.7	130.65	53.8	53.6	53.7	13.7087	101	103	100	102	100.5	101.5	63	55	61	59	62	58	76	77	77	113
1677	AM	F	0	LE BERGER	8	1	KAMPEMBA	2003-04-16	3000	0	0	0	0		2		0	0	2014-05-16	11	11	4	27	34.5	34.4	34.45	146.3	146.2	146.25	63.5	63	63.25	16.1064	116	108	108	112	112	108	75	73	69	74	72	71	88	85	86	76
1678	KK	F	0	LE BERGER	8	1	KAMPEMBA	2002-12-01	#NULL!	0	0	0	0		2		0	0	2014-05-15	11	11.8	4	29	29.9	29.9	29.9	137.4	137.3	137.35	59	59.1	59.05	15.8494	100	95	97	97.5	98.5	96	49	58	73	53.5	61	65.5	69	70	79	82
1679	MK	M	1	LE BERGER	8	1	KAMPEMBA	2003-09-20	#NULL!	0	0	0	0		2		0	0	2014-05-16	10	10.9	3	27	36.7	36.7	36.7	133.2	133.1	133.15	65.9	65.3	65.6	20.7006	102	100	103	101	102.5	101.5	73	56	50	64.5	61.5	53	80	82	71	78
1680	MM	M	1	LE BERGER	8	1	KAMPEMBA	2001-01-08	#NULL!	0	0	0	0		2		0	0	2014-05-22	13	13.2	4	28	26.6	26.6	26.6	130.5	130.4	130.45	57.5	57.7	57.6	15.6312	95	99	103	97	99	101	54	62	58	58	56	60	69	75	73	89
1681	KK	M	1	LE BERGER	8	1	KAMPEMBA	2005-02-26	#NULL!	0	0	0	0		2		0	0	2014-05-15	9	9.1	3	28	24.6	24.6	24.6	133.8	133.7	133.75	52	51.8	51.9	13.7514	103	107	111	105	107	109	63	70	63	66.5	63	66.5	77	84	83	82
1682	NM	F	0	LE BERGER	8	1	KAMPEMBA	2003-11-18	3000	0	0	0	0		2		1	0	2014-04-16	10	10.8	3	26	29.7	29.7	29.7	141.2	141.1	141.15	59	59.2	59.1	14.9072	101	104	99	102.5	100	101.5	73	70	74	71.5	73.5	72	85	83	82	91
1683	KK	F	0	LE BERGER	8	1	KAMPEMBA	2004-02-09	3500	0	0	0	0		2		0	0	2014-05-21	10	10.1	3	24	25.6	25.6	25.6	133.9	133.9	133.9	55.8	55.9	55.85	14.2784	101	106	108	103.5	104.5	107	62	63	50	62.5	56	56.5	77	75	68	69
1684	NB	M	1	LE BERGER	8	1	KAMPEMBA	2002-12-12	3500	0	0	0	0		2		1	1	2014-05-16	11	11.8	4	28	32.1	32.1	32.1	145	145	145	59	58.9	58.95	15.2675	92	91	87	91.5	89.5	89	52	53	55	52.5	53.5	54	65	66	67	72
1685	KS	M	1	LE BERGER	8	1	KAMPEMBA	1998-07-13	#NULL!	0	0	0	0		2		0	0	2014-05-13	15	15.9	5	28	42.3	42.3	42.3	153.7	153.6	153.65	63.9	64.2	64.05	17.9174	121	115	111	118	116	113	72	60	63	66	67.5	61.5	91	79	83	66
1686	BM	M	1	LE BERGER	8	1	KAMPEMBA	2004-11-01	#NULL!	0	0	0	0		2		1	1	2014-05-16	9	9.9	3	28	31.9	32.1	32	146.8	146.7	146.75	60.9	60.6	60.75	14.8591	111	106	105	108.5	108	105.5	69	73	71	71	70	72	87	85	84	91
1687	MK	F	0	LE BERGER	8	1	KAMPEMBA	2004-07-06	3500	0	0	0	0		2		0	0	2014-05-15	9	10	3	28	35.3	35.3	35.3	139.4	139.4	139.4	63.2	63.4	63.3	18.1656	118	107	105	112.5	111.5	106	73	63	71	68	72	67	99	85	83	91
1688	IK	M	1	LE BERGER	8	1	KAMPEMBA	2004-04-27	2150	0	0	0	0		2		0	0	2014-05-16	10	10	3	27	44	44	44	141.3	141.2	141.25	76.9	76.9	76.9	22.0534	127	133	127	130	127	130	77	75	76	76	76.5	75.5	97	96	95	86
1689	KM	F	0	LE BERGER	8	1	KAMPEMBA	2003-04-28	2950	0	0	0	0		2		0	1	2014-05-15	11	11	4	28	36.9	36.9	36.9	143.6	143.5	143.55	65	65.2	65.1	17.9069	112	117	112	114.5	112	114.5	51	63	55	57	53	59	84	85	77	96
1690	KM	M	1	LE BERGER	8	1	KAMPEMBA	2005-05-17	3200	0	0	0	0		2		0	0	2014-05-16	8	9	3	28	25.2	25.2	25.2	125.3	126.1	125.7	55.3	55.6	55.45	15.9489	115	111	112	113	113.5	111.5	60	63	58	61.5	59	60.5	80	79	80	66
1691	TM	F	0	LE BERGER	8	1	KAMPEMBA	2000-11-06	2700	0	0	0	0		2		0	1	2014-05-15	13	13.8	4	28	35.8	35.8	35.8	153.1	153.1	153.1	60.8	60.9	60.85	15.2733	117	102	106	109.5	111.5	104	53	60	56	56.5	54.5	58	74	80	74	105
1692	KM	F	0	LE BERGER	8	1	KAMPEMBA	2003-03-12	#NULL!	0	0	0	0		2		1	1	2014-05-16	11	11.1	4	28	24.5	24.5	24.5	129	128.9	128.95	52	52.3	52.15	14.7341	110	114	106	112	108	110	70	62	53	66	61.5	57.5	84	83	73	83
1693	NL	M	1	LE BERGER	8	1	KAMPEMBA	2004-05-05	3000	0	0	0	0		2		0	0	2014-05-16	10	10	3	27	32	32	32	135.7	135.5	135.6	59.8	60	59.9	17.4033	104	111	114	107.5	109	112.5	72	83	72	77.5	72	77.5	84	95	85	88
1694	NM	F	0	LE BERGER	8	1	KAMPEMBA	2001-06-12	#NULL!	0	0	0	0		2		0	0	2014-05-13	12	13	4	28	47.1	47.1	47.1	155	154.9	154.95	68.9	69	68.95	19.6172	110	111	107	110.5	108.5	109	55	69	54	62	54.5	61.5	80	81	76	64
1695	BE	F	0	LE BERGER	8	1	KAMPEMBA	2003-08-01	2850	0	0	0	0		2		0	0	2014-05-16	10	11	4	27	34.6	34.6	34.6	144.4	144.5	144.45	62.2	62	62.1	16.5822	123	116	118	119.5	120.5	117	62	73	80	67.5	71	76.5	94	92	87	89
1696	KS	F	0	LE BERGER	8	1	KAMPEMBA	2003-02-08	#NULL!	0	0	0	0		2		0	0	2014-05-16	11	11.1	4	27	34.2	34.2	34.2	146.4	146.3	146.35	60.5	60.7	60.6	15.9676	154	137	130	145.5	142	133.5	71	84	71	77.5	71	77.5	99	100	92	127
1697	KM	M	1	LE BERGER	8	1	KAMPEMBA	2003-12-15	#NULL!	0	0	0	0		2		0	0	2014-05-16	10	10.8	3	28	35.1	35.1	35.1	146.2	146.1	146.15	64	64.4	64.2	16.4327	112	104	109	108	110.5	106.5	72	71	65	71.5	68.5	68	86	90	87	89
1698	KT	F	0	LE BERGER	8	1	KAMPEMBA	2003-05-09	3200	0	0	0	0		2		0	0	2014-05-16	11	11	4	27	30.7	30.7	30.7	143.2	143.2	143.2	63	62.8	62.9	14.9711	99	100	99	99.5	99	99.5	64	60	69	62	66.5	64.5	78	76	79	84
1699	TK	M	1	LE BERGER	8	1	KAMPEMBA	2001-01-12	#NULL!	0	0	0	0		2		1	1	2014-05-15	13	13.1	4	28	32.1	32.1	32.1	143.5	143.3	143.4	62	62.4	62.2	15.6101	109	95	99	102	104	97	62	64	70	63	66	67	79	77	83	79
1700	KW	M	1	LE BERGER	8	1	KAMPEMBA	2001-08-27	3700	0	0	0	0		2		0	0	2014-05-15	12	12.9	4	28	33.5	33.5	33.5	144	143.9	143.95	62	61.8	61.9	16.1667	103	99	98	101	100.5	98.5	68	55	58	61.5	63	56.5	80	72	75	69
1701	YB	M	1	LE BERGER	8	1	KAMPEMBA	2004-04-14	#NULL!	0	0	0	0		2		0	0	2014-05-22	10	10.1	3	29	45.8	45.8	45.8	159	158.9	158.95	67	67.2	67.1	18.1278	144	139	113	141.5	128.5	126	102	89	77	95.5	89.5	83	118	107	104	78
1702	MN	F	0	LE BERGER	8	1	KAMPEMBA	2003-06-11	#NULL!	0	0	0	0		2		0	0	2014-05-21	10	11	4	27	35.1	35.1	35.1	148.3	148.3	148.3	59.2	58.9	59.05	15.9597	100	108	105	104	102.5	106.5	61	67	59	64	60	63	74	78	80	77
1703	NN	M	1	LE BERGER	8	1	KAMPEMBA	2001-10-18	2000	0	0	0	0		2		0	0	2014-05-15	12	12.8	4	28	44.5	44.5	44.5	158.6	158.7	158.65	66.6	66.6	66.6	17.6799	112	115	108	113.5	110	111.5	65	54	64	59.5	64.5	59	80	72	78	74
1704	NU	F	0	LE BERGER	8	1	KAMPEMBA	2001-06-26	3200	0	0	0	0		2		1	0	2014-05-16	12	12.9	4	28	49.5	49.5	49.5	161.4	161.3	161.35	64	64.2	64.1	19.0137	111	110	109	110.5	110	109.5	66	76	74	71	70	75	85	86	85	61
1705	NM	M	1	LE BERGER	8	1	KAMPEMBA	2003-09-21	3200	0	0	0	0		2		1	0	2014-05-16	10	10.9	3	27	28.5	28.5	28.5	137.3	137.3	137.3	57.5	57.3	57.4	15.1183	98	98	96	98	97	97	63	58	59	60.5	61	58.5	74	77	74	58
1706	MM	F	0	LE BERGER	8	1	KAMPEMBA	2004-09-22	3300	0	0	0	0		2		1	0	2014-05-15	9	9.9	3	30	23.1	23.1	23.1	132.2	132.3	132.25	62.8	62.4	62.6	13.2075	102	102	108	102	105	105	65	49	61	57	63	55	80	70	83	73
1707	TK	M	1	LE BERGER	8	1	KAMPEMBA	2002-05-29	#NULL!	0	0	0	0		2		1	0	2014-05-16	11	12	4	27	32.3	32.3	32.3	137.7	137.6	137.65	60.4	61	60.7	17.0471	116	111	104	113.5	110	107.5	71	72	69	71.5	70	70.5	88	94	87	76
1708	KM	M	1	LE BERGER	8	1	KAMPEMBA	2000-12-10	#NULL!	0	0	0	0		2		0	0	2014-05-16	13	13.8	4	27	27.8	27.8	27.8	138.6	138.4	138.5	55.7	55.9	55.8	14.4926	117	111	111	114	114	111	62	68	75	65	68.5	71.5	88	88	87	65
1709	TM	M	1	LE BERGER	8	1	KAMPEMBA	2001-08-01	2800	0	0	0	0		2		0	0	2014-05-15	12	12.9	4	28	31.2	31.2	31.2	140	140.2	140.1	61	61.3	61.15	15.8957	105	99	106	102	105.5	102.5	71	71	68	71	69.5	69.5	87	82	80	71
1710	TC	M	1	LE BERGER	8	1	KAMPEMBA	2004-11-22	#NULL!	0	0	0	0		2		0	0	2014-05-21	9	9.8	3	27	30.5	30.5	30.5	133.9	133.8	133.85	57.8	57.9	57.85	17.0241	108	98	93	103	100.5	95.5	70	57	59	63.5	64.5	58	90	77	73	74
1711	MI	F	0	LE BERGER	8	1	KAMPEMBA	2003-10-30	3800	0	0	0	0		2		0	0	2014-05-21	10	10.8	3	26	26	26	26	131.8	131.6	131.7	54.2	54	54.1	14.99	107	104	99	105.5	103	101.5	73	76	60	74.5	66.5	68	84	86	78	80
1712	OP	M	1	LE BERGER	4	1	KAMPEMBA	2008-03-16	#NULL!	0	0	0	0		2		0	0	2014-05-22	6	6.1	2	25	18.5	18.5	18.5	119.9	119.6	119.75	51.3	51.4	51.35	12.9009	92	96	94	94	93	95	50	69	45	59.5	47.5	57	72	78	70	100
1713	NM	M	1	LE BERGER	4	1	KAMPEMBA	2007-10-20	#NULL!	0	0	0	0		2		0	0	2014-05-19	6	6.8	2	27	16.4	16.4	16.4	109.9	109.7	109.8	49	49	49	13.6031	109	107	98	108	103.5	102.5	76	65	65	70.5	70.5	65	92	79	75	92
1714	MK	F	0	LE BERGER	4	1	KAMPEMBA	2007-03-18	3800	0	0	0	0		2		0	0	2014-05-13	7	7	3	30	19.3	19.3	19.3	116.7	166.7	141.7	51.1	51	51.05	9.61209	107	103	98	105	102.5	100.5	65	59	69	62	67	64	79	79	77	100
1715	AM	F	0	LE BERGER	4	1	KAMPEMBA	2007-08-27	3070	0	0	0	0		2		1	0	2014-05-14	6	6.9	2	30	22.6	22.6	22.6	102.2	102.1	102.15	53.6	54.3	53.95	21.6587	102	105	112	103.5	107	108.5	79	69	71	74	75	70	85	76	82	92
1776	MB	M	1	LE BERGER	4	1	KAMPEMBA	2008-11-25	#NULL!	0	0	0	0		2		0	0	2014-05-14	5	5.8	2	30	18.6	18.6	18.6	115.4	115.3	115.35	49.8	49.5	49.65	13.9791	96	94	94	95	95	94	62	52	63	57	62.5	57.5	71	76	72	87
1717	NA	M	1	LE BERGER	4	1	KAMPEMBA	2008-12-24	2800	0	0	0	0		2		0	0	2014-05-13	5	5.8	2	29	16.6	16.6	16.6	104.1	103.9	104	52.4	52.5	52.45	15.3476	119	122	127	120.5	123	124.5	81	69	70	75	75.5	69.5	96	90	90	91
1718	NT	F	0	LE BERGER	4	1	KAMPEMBA	2008-08-09	#NULL!	0	0	0	0		2		0	0	2014-05-16	5	5.9	2	28	15.5	15.5	15.5	101.9	101.8	101.85	48.7	48.5	48.6	14.942	118	110	108	114	113	109	71	67	57	69	64	62	87	82	78	104
1719	NK	M	1	LE BERGER	4	1	KAMPEMBA	2007-07-24	2600	0	0	0	0		2		0	0	2014-05-13	7	6.9	2	30	23.1	23.1	23.1	122.4	122.3	122.35	54.2	54.3	54.25	15.4314	107	108	101	107.5	104	104.5	66	62	63	64	64.5	62.5	81	82	77	89
1720	KM	M	1	LE BERGER	4	1	KAMPEMBA	2008-02-03	3500	0	0	0	0		2		0	0	2014-05-19	6	6.1	2	27	21.4	21.4	21.4	114.1	114.7	114.4	57	56.7	56.85	16.3517	112	103	105	107.5	108.5	104	50	73	58	61.5	54	65.5	75	85	76	86
1721	KK	F	0	LE BERGER	4	1	KAMPEMBA	2010-04-06	3800	0	0	0	0		2		1	1	2014-05-13	4	4	2	30	19	19	19	104.9	104.9	104.9	54.8	54.8	54.8	17.2664	126	125	122	125.5	124	123.5	97	69	61	83	79	65	108	90	83	117
1722	KM	F	0	LE BERGER	4	1	KAMPEMBA	2008-04-30	3400	0	0	0	0		2		0	0	2014-05-19	6	6	2	27	18.1	18.1	18.1	110.2	110.2	110.2	51.9	51.8	51.85	14.9044	115	106	102	110.5	108.5	104	59	54	66	56.5	62.5	60	77	75	77	99
1723	KL	M	1	LE BERGER	4	1	KAMPEMBA	2007-11-10	#NULL!	0	0	0	0		2		0	0	2014-05-13	6	6.8	2	30	19.3	19.3	19.3	110.3	110.3	110.3	54.1	54	54.05	15.8638	102	129	88	115.5	95	108.5	55	68	54	61.5	54.5	61	70	89	66	81
1724	BM	F	0	LE BERGER	4	1	KAMPEMBA	2006-09-04	#NULL!	0	0	0	0		2		0	0	2014-05-22	7	7.9	3	22	21.7	21.7	21.7	122.4	122.4	122.4	55.2	55.3	55.25	14.4843	116	118	134	117	125	126	86	94	100	90	93	97	98	105	118	68
1725	MA	F	0	LE BERGER	4	1	KAMPEMBA	2006-04-28	#NULL!	0	0	0	0		2		0	0	2014-05-22	8	8	3	29	28.1	28.2	28.15	131.4	131.2	131.3	56.8	56.9	56.85	16.3286	140	130	117	135	128.5	123.5	85	78	72	81.5	78.5	75	108	100	88	107
1726	MG	F	0	LE BERGER	9	1	KAMPEMBA	2003-06-03	#NULL!	0	0	0	0		2		0	0	2014-05-19	10	11	4	31	33.8	33.8	33.8	138.9	138.7	138.8	56.5	56.5	56.5	17.5444	141	132	119	136.5	130	125.5	85	78	73	81.5	79	75.5	109	102	88	109
1727	AO	M	1	LE BERGER	4	1	KAMPEMBA	2008-09-18	#NULL!	0	0	0	0		2		0	0	2014-05-22	5	5.9	2	29	20.1	20.1	20.1	155.2	115	135.1	51.5	51.7	51.6	11.0125	115	111	113	113	114	112	94	89	92	91.5	93	90.5	75	78	80	82
1728	KF	M	1	LE BERGER	4	1	KAMPEMBA	2007-07-01	3200	0	0	0	0		2		0	0	2014-05-13	6	7	3	30	22	22	22	121.7	121.7	121.7	54.5	54.5	54.5	14.8539	98	98	100	98	99	99	61	58	60	59.5	60.5	59	77	79	77	97
1729	ME	M	1	LE BERGER	4	1	KAMPEMBA	2006-12-22	3200	0	0	0	0		2		0	0	2014-05-14	7	7.8	3	29	22.5	22.5	22.5	120	120	120	51.7	51.5	51.6	15.625	122	121	121	121.5	121.5	121	95	74	68	84.5	81.5	71	97	90	87	107
1730	NT	M	1	LE BERGER	4	1	KAMPEMBA	2007-05-09	2900	0	0	0	0		2		0	0	2014-05-19	7	7	3	27	20.9	20.9	20.9	120	119.9	119.95	54.2	54.1	54.15	14.526	112	103	106	107.5	109	104.5	68	67	69	67.5	68.5	68	85	81	80	80
1732	BD	M	1	LE BERGER	4	1	KAMPEMBA	2009-01-16	3000	0	0	0	0		2		0	0	2014-05-14	5	5.1	2	28	19.6	19.6	19.6	115.7	115.5	115.6	54	54.1	54.05	14.667	108	105	115	106.5	111.5	110	70	75	69	72.5	69.5	72	84	84	84	98
1733	TM	M	1	LE BERGER	4	1	KAMPEMBA	2008-10-22	4000	0	0	0	0		2		0	0	2014-05-14	5	5.8	2	30	19.9	19.6	19.75	113.2	113.5	113.35	56.2	55.8	56	15.3718	115	103	92	109	103.5	97.5	63	57	69	60	66	63	87	75	78	70
1734	TZ	M	1	LE BERGER	4	1	KAMPEMBA	2007-09-16	3990	0	0	0	0		2		0	1	2014-05-13	6	6.9	2	30	19	19	19	113	112.9	112.95	54	54	54	14.893	104	109	100	106.5	102	104.5	69	70	56	69.5	62.5	63	81	70	73	78
1735	MK	M	1	LE BERGER	4	1	KAMPEMBA	2007-09-04	#NULL!	0	0	0	0		2		0	0	2014-05-22	6	6.9	2	30	20.1	20.1	20.1	114.8	114.7	114.75	51.5	51.7	51.6	15.2648	116	106	110	111	113	108	96	57	95	76.5	95.5	76	98	94	96	90
1736	MP	M	1	LE BERGER	9	1	KAMPEMBA	2002-09-01	3400	0	0	0	0		2		0	0	2014-05-15	11	11.9	4	22	52.1	51.9	52	147.7	147.6	147.65	82.9	83	82.95	23.8526	107	113	102	110	104.5	107.5	59	72	49	65.5	54	60.5	81	89	78	82
1737	LK	M	1	LE BERGER	9	1	KAMPEMBA	2002-01-16	3000	0	0	0	0		2		0	0	2014-05-16	12	12.1	4	28	44.2	44.2	44.2	150.3	150.4	150.35	68	67.9	67.95	19.5531	117	127	116	122	116.5	121.5	73	69	64	71	68.5	66.5	89	86	84	85
1738	NW	M	1	LE BERGER	9	1	KAMPEMBA	2001-10-23	3500	0	0	0	0		2		0	0	2014-05-15	12	12.8	4	26	38.3	38.3	38.3	152.6	152.5	152.55	63	62.7	62.85	16.4579	92	89	89	90.5	90.5	89	55	52	54	53.5	54.5	53	72	70	65	65
1739	NS	M	1	LE BERGER	8	1	KAMPEMBA	2006-05-15	#NULL!	0	0	0	0		2		0	0	2014-05-16	8	8	3	28	26.7	26.7	26.7	135	135	135	57.6	57.4	57.5	14.6502	101	93	91	97	96	92	59	47	52	53	55.5	49.5	71	67	67	70
1740	MT	F	0	LE BERGER	9	1	KAMPEMBA	2003-03-03	3000	0	0	0	0		2		0	0	2014-05-16	11	11.1	4	28	34.6	34.6	34.6	144.5	144.2	144.35	61.4	61.1	61.25	16.6051	103	98	91	100.5	97	94.5	52	54	51	53	51.5	52.5	80	70	67	70
1741	IM	M	1	LE BERGER	9	1	KAMPEMBA	2003-06-15	3200	0	0	0	0		2		0	0	2014-05-15	10	11	4	26	33.8	33.8	33.8	140.7	140.6	140.65	62.2	62.4	62.3	17.0859	117	101	93	109	105	97	62	68	76	65	69	72	79	79	84	67
1742	MN	F	0	LE BERGER	9	1	KAMPEMBA	2003-03-17	#NULL!	0	0	0	0		2		0	0	2014-05-16	11	11.1	4	28	40.7	40.7	40.7	157.2	157	157.1	58.5	58.6	58.55	16.4908	108	107	102	107.5	105	104.5	63	72	64	67.5	63.5	68	78	84	76	81
1743	KH	F	0	LE BERGER	9	1	KAMPEMBA	2003-05-08	3800	0	0	0	0		2		0	0	2014-05-16	11	11	4	28	49.3	49.3	49.3	151.7	151.8	151.75	72.1	72.2	72.15	21.4087	116	105	103	110.5	109.5	104	62	66	57	64	59.5	61.5	82	77	71	80
1744	MF	F	0	LE BERGER	9	1	KAMPEMBA	1998-08-08	#NULL!	0	0	0	0		2		0	0	2014-05-16	15	15.9	5	28	54.2	54.2	54.2	161	161.1	161.05	67.5	67.3	67.4	20.8967	98	98	92	98	95	95	62	55	56	58.5	59	55.5	77	69	71	82
1745	KK	M	1	LE BERGER	9	1	KAMPEMBA	2003-09-20	4100	0	0	0	0		2		0	0	2014-05-16	10	10.9	3	28	29.2	29.2	29.2	133.7	133.5	133.6	58.8	58.9	58.85	16.3595	112	113	105	112.5	108.5	109	84	74	70	79	77	72	94	87	84	85
1746	YN	F	0	LE BERGER	9	1	KAMPEMBA	2001-01-09	#NULL!	0	0	0	0		2		0	0	2014-05-16	13	13.1	4	28	51.9	51.9	51.9	166.9	166.7	166.8	73	73	73	18.6541	166	108	112	137	139	110	71	64	61	67.5	66	62.5	86	84	80	83
1747	NS	F	0	LE BERGER	9	1	KAMPEMBA	2003-01-12	2800	0	0	0	0		2		0	0	2014-05-15	11	11.1	4	24	34.8	34.8	34.8	142.4	142.3	142.35	62	62	62	17.1737	101	112	96	106.5	98.5	104	68	73	69	70.5	68.5	71	78	88	83	81
1748	TM	F	0	LE BERGER	9	1	KAMPEMBA	2002-05-06	#NULL!	0	0	0	0		2		0	0	2014-05-15	12	12	4	26	39.6	39.6	39.6	141.4	141.3	141.35	56.5	56.7	56.6	19.82	114	115	110	114.5	112	112.5	71	75	65	73	68	70	87	90	81	63
1749	KM	M	1	LE BERGER	9	1	KAMPEMBA	2000-05-01	#NULL!	0	0	0	0		2		0	0	2014-05-16	14	14	5	28	31.3	31.3	31.3	137.6	137.4	137.5	58	58	58	16.5554	104	103	109	103.5	106.5	106	70	61	69	65.5	69.5	65	83	76	78	67
1750	BI	F	0	LE BERGER	9	1	KAMPEMBA	2004-04-25	3500	0	0	0	0		2		0	0	2014-05-16	10	10	3	28	38.2	38.2	38.2	145.4	145.3	145.35	63.2	62.9	63.05	18.0815	115	110	123	112.5	119	116.5	72	73	72	72.5	72	72.5	87	88	89	81
1751	KD	F	0	LE BERGER	9	1	KAMPEMBA	2004-05-17	#NULL!	0	0	0	0		2		0	0	2014-05-15	9	10	3	27	32.4	32.4	32.4	134.2	134.1	134.15	59.8	60	59.9	18.0038	114	105	113	109.5	113.5	109	76	68	80	72	78	74	94	87	91	83
1752	LM	F	0	LE BERGER	9	1	KAMPEMBA	2002-11-09	#NULL!	0	0	0	0		2		0	0	2014-05-15	11	11.8	4	27	34.6	34.6	34.6	152	152	152	59	59.4	59.2	14.9758	131	119	124	125	127.5	121.5	71	69	89	70	80	79	97	92	99	115
1753	NK	F	0	LE BERGER	9	1	KAMPEMBA	2003-12-28	#NULL!	0	0	0	0		2		0	0	2014-05-15	10	10.8	3	24	40.9	40.9	40.9	149.2	149	149.1	63	63.2	63.1	18.3979	106	125	110	115.5	108	117.5	72	75	61	73.5	66.5	68	84	97	83	83
1754	MW	F	0	LE BERGER	9	1	KAMPEMBA	2001-01-01	#NULL!	0	0	0	0		2		0	0	2014-05-15	13	13.2	4	23	38.7	38.7	38.7	149	149	149	68	68.2	68.1	17.4316	108	104	104	106	106	104	59	59	51	59	55	55	81	78	73	72
1755	NM	M	1	LE BERGER	9	1	KAMPEMBA	2003-03-27	#NULL!	0	0	0	0		2		0	0	2014-05-15	11	11	4	23	34	34	34	140.6	140.7	140.65	63.3	63.5	63.4	17.187	107	102	114	104.5	110.5	108	71	69	67	70	69	68	90	82	86	84
1756	LM	F	0	LE BERGER	9	1	KAMPEMBA	2004-07-15	2800	0	0	0	0		2		0	0	2014-05-15	9	9.9	3	24	31.8	31.8	31.8	142	142.2	142.1	57.7	57.5	57.6	15.7485	101	98	93	99.5	97	95.5	64	66	59	65	61.5	62.5	77	79	74	71
1757	CM	F	0	LE BERGER	9	1	KAMPEMBA	2001-11-08	2800	0	0	0	0		2		0	0	2014-05-15	12	12.8	4	23	54.8	54.8	54.8	157.3	157.3	157.3	77.5	77.5	77.5	22.1474	122	126	127	124	124.5	126.5	47	67	60	57	53.5	63.5	83	86	84	59
1758	BK	F	0	LE BERGER	9	1	KAMPEMBA	2002-01-01	#NULL!	0	0	0	0		2		0	0	2014-05-15	12	12.2	4	23	44.7	44.7	44.7	157.5	157.5	157.5	62.6	62.5	62.55	18.0197	116	117	111	116.5	113.5	114	69	70	60	69.5	64.5	65	91	84	80	95
1759	KK	M	1	LE BERGER	9	1	KAMPEMBA	2002-03-07	3000	0	0	0	0		2		0	0	2014-05-15	12	12.1	4	27	35	35	35	147.2	147.1	147.15	61.4	61.4	61.4	16.164	103	94	104	98.5	103.5	99	59	65	56	62	57.5	60.5	75	80	77	77
1760	MM	M	1	LE BERGER	9	1	KAMPEMBA	2004-03-06	4800	0	0	0	0		2		1	0	2014-05-15	10	10.1	3	27	33.3	33.3	33.3	135.2	135.1	135.15	60.6	60.8	60.7	18.2311	102	97	100	99.5	101	98.5	57	71	51	64	54	61	74	81	76	69
1761	KM	M	1	LE BERGER	9	1	KAMPEMBA	2001-05-16	3000	0	0	0	0		2		0	0	2014-05-15	12	13	4	27	37.7	37.7	37.7	149.7	149.7	149.7	62.8	62.5	62.65	16.8228	105	101	97	103	101	99	76	53	51	64.5	63.5	52	84	73	69	73
1762	MS	M	1	LE BERGER	9	1	KAMPEMBA	2004-12-31	3000	0	0	0	0		2		0	0	2014-05-15	9	9.7	3	27	30.8	30.8	30.8	137.5	137.6	137.55	61.7	61.5	61.6	16.2791	101	105	98	103	99.5	101.5	77	70	57	73.5	67	63.5	83	83	72	73
1763	KM	M	1	LE BERGER	9	1	KAMPEMBA	2002-09-21	#NULL!	0	0	0	0		2		0	0	2014-05-15	11	11.9	4	27	36	36	36	142.5	142.3	142.4	64.5	64.5	64.5	17.7534	105	120	110	112.5	107.5	115	68	78	85	73	76.5	81.5	86	90	91	83
1764	MS	M	1	LE BERGER	9	1	KAMPEMBA	2001-09-01	2800	0	0	0	0		2		0	0	2014-05-15	12	12.9	4	27	28.2	28.2	28.2	137	137	137	56	56	56	15.0248	112	107	110	109.5	111	108.5	75	65	72	70	73.5	68.5	90	84	84	86
1765	KK	M	1	LE BERGER	9	1	KAMPEMBA	2001-03-05	#NULL!	0	0	0	0		2		0	0	2014-05-15	13	13.1	4	26	31.6	31.6	31.6	135.2	135	135.1	64	64	64	17.3132	103	93	92	98	97.5	92.5	66	54	54	60	60	54	77	77	70	77
1766	KJ	F	0	LE BERGER	9	1	KAMPEMBA	2002-01-07	3200	0	0	0	0		2		0	0	2014-05-15	12	12.1	4	26	40.5	40.5	40.5	152	152	152	63	62.8	62.9	17.5294	119	126	124	122.5	121.5	125	70	69	58	69.5	64	63.5	98	90	83	101
1767	BB	M	1	LE BERGER	9	1	KAMPEMBA	2002-10-11	2000	0	0	0	0		2		0	1	2014-05-15	11	11.9	4	26	30.3	30.3	30.3	149.5	149.3	149.4	57.9	58	57.95	13.575	116	103	103	109.5	109.5	103	64	64	59	64	61.5	61.5	88	84	76	65
1768	KB	M	1	LE BERGER	9	1	KAMPEMBA	2002-10-15	3000	0	0	0	0		2		0	0	2014-05-19	11	11.9	4	27	34.6	34.6	34.6	145.2	145.1	145.15	62.8	63	62.9	16.4226	95	101	92	98	93.5	96.5	62	61	62	61.5	62	61.5	73	74	73	68
1769	KK	F	0	LE BERGER	9	1	KAMPEMBA	2000-08-08	3000	0	0	0	0		2		0	0	2014-05-15	13	13.9	4	23	30.2	30.2	30.2	142.1	142	142.05	56.5	56.4	56.45	14.9666	121	134	108	127.5	114.5	121	94	84	68	89	81	76	105	95	82	108
1770	KS	M	1	LE BERGER	9	1	KAMPEMBA	2002-07-01	3000	0	0	0	0		2		0	0	2014-05-19	11	12	4	27	33.2	32.8	33	143.9	143.9	143.9	61.9	62	61.95	15.9365	129	106	99	117.5	114	102.5	81	58	76	69.5	78.5	67	100	83	86	77
1771	MM	M	1	LE BERGER	9	1	KAMPEMBA	2001-11-09	3300	0	0	0	0		2		1	0	2014-05-21	12	12.9	4	22	46.5	46.5	46.5	149.2	149.1	149.15	68.8	69	68.9	20.9029	106	104	117	105	111.5	110.5	73	72	76	72.5	74.5	74	91	88	93	86
1772	KO	F	0	LE BERGER	9	1	KAMPEMBA	2003-04-26	#NULL!	0	0	0	0		2		0	0	2014-05-21	11	11	4	23	31.8	31.8	31.8	136.8	137	136.9	58.4	58.5	58.45	16.9676	105	101	105	103	105	103	71	76	58	73.5	64.5	67	83	87	76	57
1782	MM	F	0	BAHAI ANIS	13	1	KAMPEMBA	1999-10-31	2800	0	0	0	0		2		0	0	2014-10-11	14	14.9	5	31	41.1	41.1	41.1	146.9	146.9	146.9	60	60	60	19.0458	113	110	106	111.5	109.5	108	75	66	61	70.5	68	63.5	88	86	78	66
1784	KB	M	1	BAHAI ANIS	13	1	KAMPEMBA	1997-04-16	2550	0	0	0	0		2		0	0	2014-10-11	17	17.2	5	31	61.1	61.1	61.1	169.5	169.6	169.55	70.6	70.6	70.6	21.2542	116	111	120	113.5	118	115.5	68	62	56	65	62	59	88	81	78	71
1785	KK	M	1	BAHAI ANIS	13	1	KAMPEMBA	2000-04-26	3500	0	0	0	0		2		0	0	2014-10-11	14	14.1	5	31	33.8	33.8	33.8	138.9	138.9	138.9	58	58	58	17.5191	108	112	102	110	105	107	57	62	69	59.5	63	65.5	76	83	85	67
1787	MR	F	0	BAHAI ANIS	13	1	KAMPEMBA	1999-10-25	2800	0	0	0	0		2		0	0	2014-10-11	14	15	5	31	47.1	47.1	47.1	152.3	152	152.15	64.5	64.5	64.5	20.3459	111	103	105	107	108	104	75	65	66	70	70.5	65.5	85	81	80	84
1788	MK	F	0	BAHAI ANIS	13	1	KAMPEMBA	1998-08-16	4300	0	0	0	0		2		0	0	2014-10-11	16	16	5	31	53.4	53.4	53.4	164	164	164	68.9	68.9	68.9	19.8543	105	110	104	107.5	104.5	107	73	59	62	66	67.5	60.5	83	80	78	87
1789	MM	M	1	BAHAI ANIS	12	1	KAMPEMBA	2001-06-13	2800	0	0	0	0		2		0	1	2014-10-11	13	13.1	4	31	35.8	35.8	35.8	145	145	145	64	64	64	17.0273	97	104	101	100.5	99	102.5	60	62	55	61	57.5	58.5	78	80	74	85
1790	NT	M	1	BAHAI ANIS	12	1	KAMPEMBA	1999-10-11	3500	0	0	0	0		2		0	0	2014-10-11	15	15	5	35	50.1	50.1	50.1	167	167	167	66	66	66	17.9641	121	128	121	124.5	121	124.5	76	66	71	71	73.5	68.5	90	88	88	66
1791	NN	F	0	BAHAI ANIS	12	1	KAMPEMBA	2002-01-01	4500	0	0	0	0		2		0	0	2014-10-11	12	12.3	4	32	44.2	44.2	44.2	154.1	154.1	154.1	69.1	69.1	69.1	18.613	122	121	121	121.5	121.5	121	76	65	56	70.5	66	60.5	92	89	86	86
1792	KY	M	1	BAHAI ANIS	12	1	KAMPEMBA	1997-09-09	3000	0	0	0	0		2		0	0	2014-10-11	17	17	5	33	62.1	62.1	62.1	169.8	169.8	169.8	75	75	75	21.5385	119	115	114	117	116.5	114.5	67	79	72	73	69.5	75.5	88	85	90	80
1793	MU	F	0	BAHAI ANIS	13	1	KAMPEMBA	1997-07-31	3000	0	0	0	0		2		0	0	2014-10-11	17	17	5	33	59.2	59.2	59.2	161	161.2	161.1	74.9	74.9	74.9	22.8103	116	123	114	119.5	115	118.5	70	65	62	67.5	66	63.5	86	81	79	83
1794	BN	F	0	BAHAI ANIS	12	1	KAMPEMBA	1998-08-28	2480	0	0	0	0		2		0	0	2014-10-11	16	16	5	33	54.4	54.4	54.4	163.4	163	163.2	68	68	68	20.4248	115	123	111	119	113	117	64	63	56	63.5	60	59.5	83	84	81	72
1795	BM	F	0	BAHAI ANIS	12	1	KAMPEMBA	2001-07-27	2900	0	0	0	0		2		0	0	2014-10-11	13	13	4	34	41.1	41.1	41.1	159.6	159.6	159.6	60.7	60.7	60.7	16.1353	106	106	98	106	102	102	58	53	51	55.5	54.5	52	82	73	64	76
1796	KK	M	1	BAHAI ANIS	12	1	KAMPEMBA	1998-03-23	3500	0	0	0	0		2		0	0	2014-10-11	16	16.2	5	34	54.2	54.2	54.2	171.3	171.3	171.3	68	68	68	18.4708	120	118	127	119	123.5	122.5	69	71	63	70	66	67	87	93	88	81
1797	KM	M	1	BAHAI ANIS	12	1	KAMPEMBA	1998-02-14	3300	0	0	0	0		2		0	0	2014-10-11	16	16.2	5	34	51.6	51.6	51.6	165.8	165.8	165.8	70.8	70.8	70.8	18.7707	141	138	137	139.5	139	137.5	68	74	57	71	62.5	65.5	95	94	93	89
1799	KM	M	1	BAHAI ANIS	13	1	KAMPEMBA	1998-06-30	3500	0	0	0	0		2		0	0	2014-10-11	16	16.1	5	34	57.8	57.8	57.8	171.6	171.5	171.55	68.5	68.5	68.5	19.6402	115	122	124	118.5	119.5	123	69	70	67	69.5	68	68.5	95	85	88	63
1800	NM	F	0	BAHAI ANIS	13	1	KAMPEMBA	1999-10-12	3190	0	0	0	0		2		0	0	2014-10-11	14	15	5	34	44.9	44.9	44.9	159.5	159.5	159.5	63	63	63	17.6492	118	112	115	115	116.5	113.5	61	56	61	58.5	61	58.5	78	75	81	71
1801	BM	F	0	BAHAI ANIS	13	1	KAMPEMBA	1998-06-08	4900	0	0	0	0		2		0	0	2014-10-11	16	16.1	5	34	54.9	54.9	54.9	168.5	168.5	168.5	65.3	65.3	65.3	19.3363	100	102	102	101	101	102	56	57	59	56.5	57.5	58	70	75	74	73
1802	MM	F	0	BAHAI ANIS	13	1	KAMPEMBA	1997-08-24	2690	0	0	0	0		2		0	0	2014-10-11	17	17	5	34	54.7	54.7	54.7	168.2	168.2	168.2	64.5	64.5	64.5	19.3346	127	144	124	135.5	125.5	134	78	80	75	79	76.5	77.5	99	97	91	92
1803	KK	M	1	BAHAI ANIS	13	1	KAMPEMBA	2000-04-11	3500	0	0	0	0		2		0	0	2014-10-11	14	14.2	5	34	38.2	38.2	38.2	154.1	154.1	154.1	62.7	62.7	62.7	16.0864	105	109	107	107	106	108	62	68	61	65	61.5	64.5	79	80	77	72
1804	NM	M	1	BAHAI ANIS	13	1	KAMPEMBA	1999-11-27	4500	0	0	0	0		2		0	0	2014-10-11	14	14.9	5	34	48.1	48.1	48.1	161.1	161.1	161.1	66.2	66.2	66.2	18.5334	124	123	111	123.5	117.5	117	75	74	68	74.5	71.5	71	96	90	83	69
1805	TB	F	0	BAHAI ANIS	12	1	KAMPEMBA	1998-11-16	3700	0	0	0	0		2		0	0	2014-10-11	15	16	5	35	45.6	45.6	45.6	160.5	160.5	160.5	64	64	64	17.7017	118	120	123	119	120.5	121.5	68	66	60	67	64	63	93	89	88	74
1806	MK	M	1	BAHAI ANIS	12	1	KAMPEMBA	2000-01-23	2600	0	0	0	0		2		0	0	2014-10-11	14	14.2	5	35	36.3	36.3	36.3	150	150	150	59	59	59	16.1333	101	101	100	101	100.5	100.5	68	56	61	62	64.5	58.5	78	74	76	72
1807	MM	M	1	BAHAI ANIS	12	1	KAMPEMBA	1999-06-04	2520	0	0	0	0		2		0	0	2014-10-11	15	15.1	5	35	51.5	51.5	51.5	165	165	165	67	67	67	18.9164	128	144	140	136	134	142	91	75	70	83	80.5	72.5	109	104	96	88
1808	KJ	M	1	BAHAI ANIS	12	1	KAMPEMBA	2000-04-29	3280	0	0	0	0		2		0	0	2014-10-11	14	14.1	5	34	45.8	45.8	45.8	162	162	162	61.2	61.2	61.2	17.4516	111	111	112	111	111.5	111.5	58	64	62	61	60	63	77	78	81	65
1809	MK	M	1	BAHAI ANIS	12	1	KAMPEMBA	1999-01-01	#NULL!	0	0	0	0		2		0	0	2014-10-11	15	15.3	5	35	52.7	52.7	52.7	170.6	170.6	170.6	69	69	69	18.1073	114	116	109	115	111.5	112.5	68	60	66	64	67	63	88	87	86	67
1810	SK	F	0	BAHAI ANIS	13	1	KAMPEMBA	1997-12-16	4100	0	0	0	0		2		0	0	2014-10-11	16	16.9	5	35	47.7	47.7	47.7	159	159	159	65	65	65	18.8679	108	109	119	108.5	113.5	114	73	71	77	72	75	74	90	89	93	78
1830	MI	F	0	BAHAI ANIS	15	1	KAMPEMBA	1997-01-18	2500	0	0	0	0		2		0	0	2014-10-14	17	17.3	5	34	61.3	61.3	61.3	166.3	166.3	166.3	74.3	74.3	74.3	22.1654	115	108	108	111.5	111.5	108	69	70	63	69.5	66	66.5	83	80	79	84
1832	MM	F	0	BAHAI ANIS	15	1	KAMPEMBA	1997-03-18	4150	0	0	0	0		2		0	0	2014-10-14	17	17.2	5	34	65	65	65	163.3	163.3	163.3	68.5	68.5	68.5	24.3748	125	126	128	125.5	126.5	127	62	66	67	64	64.5	66.5	88	89	82	79
1837	MS	F	0	BAHAI ANIS	15	1	KAMPEMBA	1997-01-30	#NULL!	0	0	0	0		2		0	0	2014-10-14	17	17.2	5	34	55.1	55.1	55.1	163.9	163.9	163.9	70.4	70.4	70.4	20.5113	103	106	106	104.5	104.5	106	61	49	55	55	58	52	74	72	71	70
1840	KK	M	1	BAHAI ANIS	13	1	KAMPEMBA	1998-10-17	2800	0	0	0	0		2		0	0	2014-10-14	15	16	5	34	58.7	58.5	58.6	169.9	169.9	169.9	70.1	70.1	70.1	20.3007	105	98	107	101.5	106	102.5	59	54	57	56.5	58	55.5	77	77	73	88
1841	SM	F	0	BAHAI ANIS	13	1	KAMPEMBA	1999-12-12	3500	0	0	0	0		2		0	0	2014-10-14	14	14.9	5	35	54.6	54.6	54.6	163	163	163	74.2	74.2	74.2	20.5503	112	106	111	109	111.5	108.5	59	73	69	66	64	71	83	86	84	87
1842	OO	F	0	BAHAI ANIS	13	1	KAMPEMBA	1999-02-02	3500	0	0	0	0		2		0	0	2014-10-14	15	15.3	5	35	51.2	51.1	51.15	163.6	163.6	163.6	72.7	72.6	72.65	19.1108	120	121	132	120.5	126	126.5	75	79	77	77	76	78	95	96	96	87
1845	SK	M	1	BAHAI ANIS	11	1	KAMPEMBA	2001-11-07	2750	0	0	0	0		2		0	0	2014-10-18	12	13	4	28	35.9	35.9	35.9	145.2	145.2	145.2	61.1	61.1	61.1	17.0279	118	108	108	113	113	108	71	68	70	69.5	70.5	69	82	84	83	107
1846	AA	F	0	BAHAI ANIS	11	1	KAMPEMBA	2000-06-06	3200	0	0	0	0		2		0	0	2014-10-18	14	14.2	5	28	51.9	51.9	51.9	160.1	160.1	160.1	73.6	73.3	73.45	20.2481	101	107	98	104	99.5	102.5	57	56	59	56.5	58	57.5	76	75	77	77
1847	SE	F	0	BAHAI ANIS	11	1	KAMPEMBA	2001-12-12	3500	0	0	0	0		2		0	0	2014-10-18	12	13	4	27	45.5	45.5	45.5	147.2	147.2	147.2	67.3	67.1	67.2	20.9989	118	109	104	113.5	111	106.5	68	62	57	65	62.5	59.5	85	80	74	89
1848	BE	F	0	BAHAI ANIS	12	1	KAMPEMBA	1997-12-25	#NULL!	0	0	0	0		2		0	0	2014-10-18	16	16.9	5	27	67.8	67.8	67.8	157.1	157.1	157.1	79	79	79	27.4712	113	124	121	118.5	117	122.5	59	66	54	62.5	56.5	60	79	84	80	86
1849	BI	F	0	BAHAI ANIS	13	1	KAMPEMBA	1997-08-06	#NULL!	0	0	0	0		2		0	0	2014-10-14	17	17.1	5	34	49.2	49.2	49.2	156.9	156.9	156.9	69.3	69.3	69.3	19.9857	108	117	113	112.5	110.5	115	66	62	51	64	58.5	56.5	81	81	73	78
1850	SB	F	0	BAHAI ANIS	13	1	KAMPEMBA	1998-01-28	4000	0	0	0	0		2		0	0	2014-10-14	16	16.2	5	35	46.1	46.1	46.1	163.3	163.3	163.3	63.2	63.2	63.2	17.2874	119	119	118	119	118.5	118.5	67	61	61	64	64	61	91	85	81	59
1851	MS	F	0	BAHAI ANIS	13	1	KAMPEMBA	2000-12-16	1900	0	0	0	0		2		0	0	2014-10-14	13	13.9	4	35	42.7	42.7	42.7	153.2	153.2	153.2	64.9	64.9	64.9	18.1933	123	118	122	120.5	122.5	120	73	62	63	67.5	68	62.5	91	82	82	83
1853	MM	F	0	BAHAI ANIS	13	1	KAMPEMBA	1997-11-28	#NULL!	0	0	0	0		2		0	0	2014-10-14	16	16.9	5	35	51.2	51.2	51.2	162.4	162.4	162.4	70.2	70.2	70.2	19.4132	117	113	111	115	114	112	73	71	64	72	68.5	67.5	89	88	85	93
1854	KM	F	0	BAHAI ANIS	12	1	KAMPEMBA	1998-11-10	2580	0	0	0	0		2		0	0	2014-10-14	15	16	5	35	48.7	48.7	48.7	159.2	159.2	159.2	67.6	67.6	67.6	19.2151	106	110	112	108	109	111	60	65	59	62.5	59.5	62	81	82	86	88
1855	NB	F	0	BAHAI ANIS	12	1	KAMPEMBA	1999-01-06	3200	0	0	0	0		2		0	0	2014-10-14	15	15.3	5	35	55.5	55.5	55.5	166	166	166	74.2	74.2	74.2	20.1408	131	125	121	128	126	123	78	66	71	72	74.5	68.5	93	85	91	112
1856	FB	F	0	BAHAI ANIS	14	1	KAMPEMBA	1998-08-05	2800	0	0	0	0		2		0	0	2014-10-14	16	16.1	5	35	45.8	45.8	45.8	152.3	152.3	152.3	65	65	65	19.7454	116	110	113	113	114.5	111.5	61	60	56	60.5	58.5	58	84	80	86	94
1857	FM	F	0	BAHAI ANIS	14	1	KAMPEMBA	1997-08-30	3000	0	0	0	0		2		0	0	2014-10-14	17	17	5	34	47.3	47.3	47.3	164	164	164	64.3	64.3	64.3	17.5863	116	118	110	117	113	114	68	58	64	63	66	61	87	80	82	81
1859	MB	F	0	BAHAI ANIS	14	1	KAMPEMBA	1997-11-16	3400	0	0	0	0		2		0	0	2014-10-14	16	17	5	34	58.8	58.6	58.7	161.6	161.6	161.6	72.6	72.6	72.6	22.4779	103	97	97	100	100	97	61	58	63	59.5	62	60.5	79	76	76	83
1860	BM	M	1	BAHAI ANIS	12	1	KAMPEMBA	1997-10-28	3500	0	0	0	0		2		0	0	2014-10-14	16	17	5	34	59.5	59.5	59.5	162.7	162.7	162.7	73.2	73.2	73.2	22.4772	122	134	133	128	127.5	133.5	69	71	80	70	74.5	75.5	90	95	99	73
1861	SJ	M	1	BAHAI ANIS	14	1	KAMPEMBA	1998-09-30	2700	0	0	0	0		2		0	0	2014-10-14	16	16	5	34	49.6	49.6	49.6	156.3	156.3	156.3	69.2	69.2	69.2	20.3032	110	103	113	106.5	111.5	108	71	54	55	62.5	63	54.5	84	77	77	69
1862	MS	M	1	BAHAI ANIS	14	1	KAMPEMBA	1998-04-24	3260	0	0	0	0		2		0	0	2014-10-14	16	16.2	5	34	60.3	60.3	60.3	176.6	176.6	176.6	80	80	80	19.3346	122	120	118	121	120	119	83	70	76	76.5	79.5	73	103	85	94	77
1863	MP	M	1	BAHAI ANIS	13	1	KAMPEMBA	2000-05-07	2800	0	0	0	0		2		0	0	2014-10-14	14	14.2	5	34	53.6	53.6	53.6	165.5	165.5	165.5	69.7	69.7	69.7	19.569	116	115	114	115.5	115	114.5	72	71	68	71.5	70	69.5	92	87	87	91
1864	KM	M	1	BAHAI ANIS	14	1	KAMPEMBA	1997-03-11	3400	0	0	0	0		2		1	0	2014-10-14	17	17.2	5	34	70.5	70.5	70.5	178.2	178.2	178.2	81.7	81.7	81.7	22.2011	120	117	116	118.5	118	116.5	64	61	56	62.5	60	58.5	89	81	78	52
1865	KT	M	1	BAHAI ANIS	14	1	KAMPEMBA	1997-03-28	3500	0	0	0	0		2		1	0	2014-10-14	17	17.2	5	33	81	81	81	176.1	176.1	176.1	84.1	84.2	84.15	26.1196	119	125	115	122	117	120	69	77	82	73	75.5	79.5	83	101	100	74
1866	NM	M	1	BAHAI ANIS	14	1	KAMPEMBA	1998-01-05	2900	0	0	0	0		2		0	0	2014-10-14	16	16.3	5	33	51.8	51.8	51.8	170	170	170	74.5	74.5	74.5	17.9239	121	119	122	120	121.5	120.5	70	69	65	69.5	67.5	67	86	89	89	106
1868	KM	M	1	BAHAI ANIS	14	1	KAMPEMBA	1997-08-14	3400	0	0	0	0		2		0	0	2014-10-15	17	17.1	5	34	58.6	58.6	58.6	172.8	172.8	172.8	71.6	71.6	71.6	19.625	99	106	117	102.5	108	111.5	63	52	52	57.5	57.5	52	81	72	72	78
1869	MK	M	1	BAHAI ANIS	15	1	RUASHI	1998-07-06	2700	0	0	0	0		2		0	0	2014-10-15	16	16.1	5	34	61.5	61.5	61.5	167.1	167	167.05	72	72	72	22.0385	112	110	112	111	112	111	72	67	71	69.5	71.5	69	85	87	87	63
1871	NN	F	0	BAHAI ANIS	14	1	KAMPEMBA	1997-09-10	#NULL!	0	0	0	0		2		0	0	2014-10-15	17	17	5	34	50.1	50.1	50.1	161.9	161.9	161.9	71.8	71.8	71.8	19.1137	122	115	115	118.5	118.5	115	72	68	66	70	69	67	85	87	83	90
1872	YK	F	0	BAHAI ANIS	14	1	KAMPEMBA	1997-09-03	#NULL!	0	0	0	0		2		0	0	2014-10-15	17	17.1	5	34	48.5	48.5	48.5	163.5	163.5	163.5	65.2	65.2	65.2	18.1429	128	127	119	127.5	123.5	123	75	71	68	73	71.5	69.5	98	89	86	88
1874	KM	M	1	BAHAI ANIS	14	1	KAMPEMBA	1997-01-09	3700	0	0	0	0		2		1	1	2014-10-15	17	17.3	5	34	60.3	60.3	60.3	180.2	180.2	180.2	76.6	76.6	76.6	18.5698	129	129	119	129	124	124	78	67	68	72.5	73	67.5	96	93	86	81
1880	BM	F	0	BAHAI ANIS	14	1	KAMPEMBA	1998-04-25	2700	0	0	0	0		2		0	0	2014-10-15	16	16.2	5	35	48.5	48.5	48.5	155.5	155.5	155.5	61.9	61.8	61.85	20.0577	115	116	106	115.5	110.5	111	70	70	62	70	66	66	89	88	81	73
1882	KY	F	0	BAHAI ANIS	11	1	KAMPEMBA	1999-08-03	3800	0	0	0	0		2		0	0	2014-10-17	15	15.1	5	26	50.4	50.4	50.4	159.5	159.5	159.5	67.3	67.3	67.3	19.8111	129	110	119	119.5	124	114.5	78	71	69	74.5	73.5	70	93	90	89	87
1883	KM	M	1	BAHAI ANIS	10	1	KAMPEMBA	2002-04-16	3900	0	0	0	0		2		0	0	2014-10-16	12	12.2	4	35	35.9	35.9	35.9	153.5	153.5	153.5	64.5	64.5	64.5	15.2362	102	105	107	103.5	104.5	106	62	60	65	61	63.5	62.5	81	75	83	79
1884	EO	F	0	BAHAI ANIS	10	1	KAMPEMBA	2001-08-14	4500	0	0	0	0		2		0	0	2014-10-16	13	13.1	4	35	47	47	47	150	150	150	66.3	66.3	66.3	20.8889	110	107	107	108.5	108.5	107	59	60	53	59.5	56	56.5	74	78	72	98
1885	MM	F	0	BAHAI ANIS	10	1	KAMPEMBA	2002-09-12	3600	0	0	0	0		2		0	0	2014-10-15	12	12	4	35	52.6	52.6	52.6	162.7	162.7	162.7	69	69	69	19.8706	112	115	121	113.5	116.5	118	68	72	78	70	73	75	85	86	85	75
1886	SL	M	1	BAHAI ANIS	10	1	KAMPEMBA	2002-08-27	3800	0	0	0	0		2		0	0	2014-10-15	12	12	4	35	39.4	39.4	39.4	149.8	149.8	149.8	64	64	64	17.5579	107	108	109	107.5	108	108.5	69	61	67	65	68	64	85	83	83	75
1887	MK	F	0	BAHAI ANIS	10	1	KAMPEMBA	2003-04-14	2500	0	0	0	0		2		0	0	2014-10-15	11	11.2	4	34	45.8	45.8	45.8	148.7	148.7	148.7	71	71	71	20.713	113	104	103	108.5	108	103.5	61	57	61	59	61	59	81	77	77	90
1888	KK	F	0	BAHAI ANIS	10	1	KAMPEMBA	2002-05-12	3300	0	0	0	0		2		0	0	2014-10-15	12	12.2	4	34	35.8	35.8	35.8	147.1	147.1	147.1	61.7	61.7	61.7	16.5447	119	115	117	117	118	116	49	71	47	60	48	59	74	89	81	69
1889	KM	F	0	BAHAI ANIS	10	1	KAMPEMBA	2002-08-24	3800	0	0	0	0		2		0	0	2014-10-15	12	12	4	34	35.4	35.4	35.4	156.6	156.6	156.6	65	65	65	14.4351	113	106	111	109.5	112	108.5	70	66	64	68	67	65	84	82	81	94
1890	MN	M	1	BAHAI ANIS	10	1	KAMPEMBA	2003-08-15	3750	0	0	0	0		2		0	0	2014-10-15	11	11.1	4	34	39	39	39	147.4	147.4	147.4	66	66	66	17.9502	117	109	107	113	112	108	67	63	55	65	61	59	85	79	76	83
1891	BK	F	0	BAHAI ANIS	10	1	KAMPEMBA	2000-02-25	3200	0	0	0	0		2		0	0	2014-10-15	14	14.2	5	34	49.6	49.6	49.6	150	150.1	150.05	75.1	75.1	75.1	22.0298	106	102	100	104	103	101	68	58	55	63	61.5	56.5	81	75	72	67
1892	TK	M	1	BAHAI ANIS	10	1	KAMPEMBA	2001-05-15	2800	0	0	0	0		2		0	0	2014-10-15	13	13.1	4	34	33.3	33.3	33.3	138.5	138.5	138.5	61	61.1	61.05	17.3598	105	119	106	112	105.5	112.5	68	59	68	63.5	68	63.5	84	81	80	71
1893	BK	F	0	BAHAI ANIS	10	1	KAMPEMBA	2003-06-11	3000	0	0	0	0		2		0	0	2014-10-15	11	11.1	4	34	41.6	41.6	41.6	154.4	154.4	154.4	62.8	62.8	62.8	17.4501	118	113	131	115.5	124.5	122	65	72	66	68.5	65.5	69	84	86	90	81
1894	KA	F	0	BAHAI ANIS	10	1	KAMPEMBA	2002-03-12	3000	0	0	0	0		2		0	0	2014-10-15	12	12.2	4	34	32.9	32.9	32.9	144.1	144.1	144.1	64.5	64.5	64.5	15.8441	109	103	107	106	108	105	62	67	59	64.5	60.5	63	80	81	80	89
1895	NN	F	0	BAHAI ANIS	10	1	KAMPEMBA	2002-09-27	3180	0	0	0	0		2		0	0	2014-10-15	12	12	4	34	40.2	40.2	40.2	140.2	140.2	140.2	73.1	73	73.05	20.4517	104	107	114	105.5	109	110.5	60	63	74	61.5	67	68.5	76	78	86	89
1896	KN	F	0	BAHAI ANIS	10	1	KAMPEMBA	2001-07-12	2300	0	0	0	0		2		0	0	2014-10-15	13	13.1	4	34	42.9	42.9	42.9	150	150	150	68.1	68.1	68.1	19.0667	118	129	123	123.5	120.5	126	78	78	75	78	76.5	76.5	102	97	90	102
1897	NM	F	0	BAHAI ANIS	10	1	KAMPEMBA	2001-08-17	3700	0	0	0	0		2		0	0	2014-10-15	13	13.1	4	34	46.8	46.8	46.8	157.6	157.6	157.6	69.2	69.2	69.2	18.8423	123	112	113	117.5	118	112.5	74	63	65	68.5	69.5	64	94	84	88	89
1898	KL	F	0	BAHAI ANIS	10	1	KAMPEMBA	2003-01-01	3500	0	0	0	0		2		0	0	2014-10-15	11	11.3	4	34	28	28	28	137.6	137.6	137.6	55.1	55.1	55.1	14.7884	122	106	128	114	125	117	66	77	55	71.5	60.5	66	83	87	83	95
1899	TP	M	1	BAHAI ANIS	10	1	KAMPEMBA	2002-03-26	3500	0	0	0	0		2		0	0	2014-10-15	12	12.2	4	35	37.8	37.8	37.8	152.6	152.6	152.6	67.5	67.5	67.5	16.2324	111	112	115	111.5	113	113.5	66	67	67	66.5	66.5	67	86	84	84	83
1900	KL	F	0	BAHAI ANIS	10	1	KAMPEMBA	1999-09-17	4800	0	0	0	0		2		0	0	2014-10-15	15	15	5	35	48.1	48.1	48.1	162	162	162	67.5	67.5	67.5	18.328	128	113	118	120.5	123	115.5	71	68	79	69.5	75	73.5	90	83	93	71
1901	AL	F	0	BAHAI ANIS	10	1	KAMPEMBA	2001-08-24	2300	0	0	0	0		2		0	0	2014-10-15	13	13	4	35	52.6	52.6	52.6	164.5	164.5	164.5	70.5	70.5	70.5	19.4381	121	124	124	122.5	122.5	124	87	75	81	81	84	78	103	106	108	94
1902	KG	M	1	BAHAI ANIS	10	1	KAMPEMBA	2003-01-13	3770	0	0	0	0		2		0	0	2014-10-16	11	11.3	4	34	42.3	42.3	42.3	152.2	152.2	152.2	70.9	70.9	70.9	18.2604	115	109	105	112	110	107	51	51	61	51	56	56	75	73	75	74
1903	KK	M	1	BAHAI ANIS	10	1	KAMPEMBA	2000-02-22	1920	0	0	0	0		2		0	0	2014-10-16	14	14.2	5	34	43.2	43.2	43.2	160.2	160.2	160.2	69.9	69.9	69.9	16.8329	99	97	92	98	95.5	94.5	65	63	59	64	62	61	83	77	71	88
1904	IN	F	0	BAHAI ANIS	10	1	KAMPEMBA	2001-09-03	3600	0	0	0	0		2		0	0	2014-10-16	13	13.1	4	34	54.6	54.6	54.6	163.5	163.5	163.5	73.6	73.6	73.6	20.4248	111	101	109	106	110	105	64	64	64	64	64	64	86	81	80	96
1905	MK	M	1	BAHAI ANIS	10	1	KAMPEMBA	2003-10-22	4400	0	0	0	0		2		0	1	2014-10-16	10	11	4	34	35.9	35.9	35.9	145.7	145.7	145.7	63	63	63	16.9112	101	105	111	103	106	108	65	75	61	70	63	68	75	90	82	91
1906	DK	M	1	BAHAI ANIS	10	1	KAMPEMBA	2002-03-22	3140	0	0	0	0		2		0	0	2014-10-16	12	12.2	4	34	38.3	38.3	38.3	145.7	145.7	145.7	62.4	62.4	62.4	18.0418	115	115	109	115	112	112	75	64	67	69.5	71	65.5	90	90	87	72
1907	EN	F	0	BAHAI ANIS	10	1	KAMPEMBA	2001-01-17	3000	0	0	0	0		2		0	0	2014-10-16	13	13.3	4	34	55.4	55.4	55.4	159.6	159.6	159.6	76	76	76	21.7492	96	107	117	101.5	106.5	112	58	63	63	60.5	60.5	63	78	80	72	92
1908	KY	F	0	BAHAI ANIS	10	1	KAMPEMBA	2001-04-17	2800	0	0	0	0		2		0	0	2014-10-16	13	13.2	4	34	44.1	44.1	44.1	158.5	158.5	158.5	68.4	68.5	68.45	17.5542	124	124	124	124	124	124	74	78	67	76	70.5	72.5	94	97	93	96
1909	NK	F	0	BAHAI ANIS	10	1	KAMPEMBA	1997-06-01	3000	0	0	0	0		2		0	0	2014-10-13	17	17.2	5	34	52.7	52.7	52.7	155.2	155.2	155.2	74.2	74.2	74.2	21.879	115	117	117	116	116	117	76	72	64	74	70	68	91	88	89	91
1910	MM	M	1	BAHAI ANIS	10	1	KAMPEMBA	2001-01-11	4000	0	0	0	0		2		0	0	2014-10-16	13	13.3	4	35	45.7	45.7	45.7	163	163	163	67.7	67.5	67.6	17.2005	116	108	100	112	108	104	62	57	55	59.5	58.5	56	76	75	71	76
1911	TM	M	1	BAHAI ANIS	10	1	KAMPEMBA	2000-06-28	2500	0	0	0	0		2		0	0	2014-10-16	14	14.1	5	35	30.4	30.4	30.4	141.1	141.1	141.1	63	63	63	15.2693	100	103	101	101.5	100.5	102	62	52	50	57	56	51	72	73	72	76
1912	MT	F	0	BAHAI ANIS	10	1	KAMPEMBA	2000-04-24	3500	0	0	0	0		2		0	0	2014-10-16	14	14.2	5	35	42.3	42.3	42.3	153.1	153.1	153.1	68.2	68.2	68.2	18.0464	121	117	116	119	118.5	116.5	86	71	69	78.5	77.5	70	102	88	86	100
1913	NF	F	0	BAHAI ANIS	10	1	KAMPEMBA	1999-03-27	3080	0	0	0	0		2		0	0	2014-10-16	15	15.2	5	35	43.3	43.3	43.3	146.1	146.1	146.1	70.6	70.6	70.6	20.2856	126	129	124	127.5	125	126.5	86	75	71	80.5	78.5	73	106	100	90	94
1914	MN	M	1	BAHAI ANIS	11	1	KAMPEMBA	2000-08-07	5500	0	0	0	0		2		0	0	2014-10-16	14	14.1	5	35	33.9	33.9	33.9	142.2	142.2	142.2	65.7	65.5	65.6	16.7649	117	119	117	118	117	118	72	66	68	69	70	67	91	81	83	93
1915	YM	M	1	BAHAI ANIS	10	1	KAMPEMBA	2003-03-24	4200	0	0	0	0		2		0	0	2014-10-16	11	11.2	4	35	36.7	36.4	36.55	148.5	148.5	148.5	60.9	60.9	60.9	16.5743	114	116	115	115	114.5	115.5	65	66	65	65.5	65	65.5	87	85	83	88
1916	KK	F	0	BAHAI ANIS	10	1	KAMPEMBA	2001-08-14	2700	0	0	0	0		2		0	0	2014-10-16	13	13.1	4	35	39	39	39	150.9	150.9	150.9	64	64	64	17.1272	109	105	105	107	107	105	55	55	54	55	54.5	54.5	80	74	77	83
1917	BN	F	0	BAHAI ANIS	10	1	KAMPEMBA	2002-10-30	2800	0	0	0	0		2		0	0	2014-10-16	11	12	4	35	38.4	38.4	38.4	148.2	148.2	148.2	68.6	68.6	68.6	17.4838	133	122	125	127.5	129	123.5	91	80	63	85.5	77	71.5	107	98	96	74
1918	ML	M	1	BAHAI ANIS	10	1	KAMPEMBA	2000-03-03	4900	0	0	0	0		2		0	0	2014-10-16	14	14.2	5	35	59	59	59	165.7	165.7	165.7	75.9	75.9	75.9	21.4885	103	115	121	109	112	118	67	70	68	68.5	67.5	69	85	90	87	78
1919	KK	F	0	BAHAI ANIS	10	1	KAMPEMBA	2000-11-27	3900	0	0	0	0		2		0	0	2014-10-16	13	13.9	4	35	52.6	52.6	52.6	158	158	158	74.9	74.9	74.9	21.0703	103	106	105	104.5	104	105.5	51	57	51	54	51	54	75	79	72	69
1920	MM	F	0	BAHAI ANIS	10	1	KAMPEMBA	2003-05-20	3500	0	0	0	0		2		0	0	2014-10-16	11	11.1	4	36	33.1	33.1	33.1	151	151	151	54.5	54.5	54.5	14.5169	112	104	107	108	109.5	105.5	71	61	68	66	69.5	64.5	85	76	83	98
1921	LM	M	1	BAHAI ANIS	10	1	KAMPEMBA	2002-12-12	3900	0	0	0	0		2		0	0	2014-10-16	11	12	4	36	31.9	31.9	31.9	136.5	136.5	136.5	54.9	54.8	54.85	17.1209	116	109	107	112.5	111.5	108	67	58	60	62.5	63.5	59	85	79	82	88
1922	TL	F	0	BAHAI ANIS	10	1	KAMPEMBA	2002-08-17	4670	0	0	0	0		2		0	0	2014-10-16	12	12.1	4	34	64.3	64.3	64.3	162.5	162.5	162.5	81	81	81	24.3503	111	123	122	117	116.5	122.5	64	70	73	67	68.5	71.5	90	89	94	85
1923	MM	M	1	BAHAI ANIS	10	1	KAMPEMBA	2001-10-12	3400	0	0	0	0		2		0	0	2014-10-16	13	13	4	36	41.1	41.1	41.1	153.3	153.3	153.3	63	63	63	17.4887	114	109	107	111.5	110.5	108	63	57	64	60	63.5	60.5	81	77	87	77
1924	MB	F	0	BAHAI ANIS	10	1	KAMPEMBA	2001-09-18	4200	0	0	0	0		2		0	0	2014-10-16	13	13	4	36	39	39	39	152.3	152.3	152.3	67.6	67.6	67.6	16.8138	110	118	117	114	113.5	117.5	62	64	59	63	60.5	61.5	91	86	84	101
1925	KM	F	0	BAHAI ANIS	10	1	KAMPEMBA	2002-12-17	2670	0	0	0	0		2		0	0	2014-10-16	11	11.9	4	36	47.8	47.8	47.8	160	160	160	75.9	75.9	75.9	18.6719	106	112	119	109	112.5	115.5	65	71	62	68	63.5	66.5	82	86	83	92
1926	SN	M	1	BAHAI ANIS	10	1	KAMPEMBA	2000-09-05	3000	0	0	0	0		2		0	0	2014-10-16	14	14.1	5	36	44.7	44.7	44.7	153.3	153.3	153.3	68.1	68.3	68.2	19.0206	105	117	106	111	105.5	111.5	78	57	50	67.5	64	53.5	88	79	70	92
1927	KV	M	1	BAHAI ANIS	10	1	KAMPEMBA	2001-07-04	5000	0	0	0	0		2		0	0	2014-10-16	13	13.1	4	36	49.1	49	49.05	163.9	163.9	163.9	70	70	70	18.2592	106	115	108	110.5	107	111.5	72	69	62	70.5	67	65.5	87	85	83	81
1928	KK	M	1	BAHAI ANIS	10	1	KAMPEMBA	2000-09-09	2970	0	0	0	0		2		0	0	2014-10-16	14	14	5	36	47.2	47.2	47.2	163.5	163.5	163.5	69.7	69.9	69.8	17.6566	112	119	111	115.5	111.5	115	72	66	60	69	66	63	90	86	87	82
1929	KK	F	0	BAHAI ANIS	11	1	KAMPEMBA	2001-02-22	2700	0	0	0	0		2		0	0	2014-10-16	13	13.2	4	35	53.8	53.8	53.8	156	156	156	75.9	75.9	75.9	22.1072	107	131	131	119	119	131	80	77	77	78.5	78.5	77	93	96	104	95
1930	MV	F	0	BAHAI ANIS	11	1	KAMPEMBA	1999-09-28	3500	0	0	0	0		2		0	0	2014-10-16	15	15	5	35	57.4	57.4	57.4	161.1	161.1	161.1	78	78.1	78.05	22.1167	110	114	120	112	115	117	65	50	92	57.5	78.5	71	78	68	97	80
1931	LN	F	0	BAHAI ANIS	11	1	KAMPEMBA	1999-12-27	2950	0	0	0	0		2		0	1	2014-10-16	14	14.9	5	35	64.5	64.5	64.5	164	164	164	84.7	84.7	84.7	23.9813	110	113	110	111.5	110	111.5	69	75	63	72	66	69	83	89	78	79
1932	TK	M	1	BAHAI ANIS	11	1	KAMPEMBA	1999-10-11	2490	0	0	0	0		2		0	0	2014-10-16	15	15	5	35	47.1	47.1	47.1	159.1	159.1	159.1	68	68	68	18.6072	113	113	113	113	113	113	54	60	59	57	56.5	59.5	76	77	76	78
1933	MN	M	1	BAHAI ANIS	11	1	KAMPEMBA	2001-07-07	4000	0	0	0	0		2		0	0	2014-10-16	13	13.1	4	35	38.88	38.8	38.84	151.3	151.3	151.3	63	63	63	16.9669	107	105	114	106	110.5	109.5	65	71	58	68	61.5	64.5	82	84	80	83
1934	NI	M	1	BAHAI ANIS	11	1	KAMPEMBA	1999-02-16	3500	0	0	0	0		2		0	0	2014-10-16	15	15.2	5	35	47.1	47.1	47.1	164.4	164.4	164.4	67.2	67.2	67.2	17.4268	109	111	107	110	108	109	65	58	53	61.5	59	55.5	83	77	72	80
1935	MK	F	0	BAHAI ANIS	11	1	KAMPEMBA	2001-11-17	2800	0	0	0	0		2		0	0	2014-10-16	12	13	4	34	47.2	47.2	47.2	160.5	160.5	160.5	74.6	74.8	74.7	18.3228	119	113	106	116	112.5	109.5	70	64	61	67	65.5	62.5	87	81	78	97
1936	LK	F	0	BAHAI ANIS	10	1	KAMPEMBA	2002-10-31	3300	0	0	0	0		2		0	0	2014-10-16	11	12	4	36	35.7	35.7	35.7	151.2	151.2	151.2	61.7	61.7	61.7	15.6158	115	115	125	115	120	120	62	62	70	62	66	66	80	81	89	78
1937	TT	M	1	BAHAI ANIS	10	1	KAMPEMBA	2000-07-07	4500	0	0	0	0		2		0	0	2014-10-16	14	14.1	5	34	50.8	50.8	50.8	157.2	157.2	157.2	71.6	71.6	71.6	20.5569	121	128	130	124.5	125.5	129	59	75	61	67	60	68	90	97	84	61
1938	MS	M	1	BAHAI ANIS	10	1	KAMPEMBA	2002-09-16	1900	0	0	0	0		2		0	0	2014-10-16	12	12	4	34	35.9	35.9	35.9	145.6	145.6	145.6	63.7	63.6	63.65	16.9345	109	100	98	104.5	103.5	99	56	57	61	56.5	58.5	59	79	76	72	96
1939	MK	M	1	BAHAI ANIS	10	1	KAMPEMBA	2001-04-13	2001	0	0	0	0		2		0	0	2014-10-16	13	13.2	4	34	45.9	45.9	45.9	157.5	157.5	157.5	68.5	68.5	68.5	18.5034	127	137	134	132	130.5	135.5	85	72	69	78.5	77	70.5	103	95	92	91
1940	YM	F	0	BAHAI ANIS	11	1	KAMPEMBA	2001-07-24	4000	0	0	0	0		2		0	0	2014-10-16	13	13.1	4	35	49	49	49	158.5	158.5	158.5	74.7	74.7	74.7	19.5046	145	128	132	136.5	138.5	130	69	71	61	70	65	66	95	93	91	85
1941	KT	F	0	BAHAI ANIS	11	1	KAMPEMBA	2000-06-08	2800	0	0	0	0		2		0	0	2014-10-16	14	14.1	5	35	54.8	54.8	54.8	161.4	161.4	161.4	76.5	76.5	76.5	21.0365	124	102	116	113	120	109	83	59	62	71	72.5	60.5	108	78	83	97
1942	KK	M	1	BAHAI ANIS	10	1	KAMPEMBA	2001-02-05	3690	0	0	0	0		2		0	0	2014-10-16	13	13.3	4	33	40.7	40.7	40.7	157.6	157.6	157.6	67	66.8	66.9	16.3863	112	110	108	111	110	109	64	65	74	64.5	69	69.5	84	80	91	79
1943	ML	M	1	BAHAI ANIS	10	1	KAMPEMBA	2001-04-30	3600	0	0	0	0		2		0	0	2014-10-16	13	13.1	4	33	39.6	39.6	39.6	146.7	146.7	146.7	68.1	68.1	68.1	18.4007	108	112	110	110	109	111	73	65	69	69	71	67	91	86	85	58
1944	MK	F	0	BAHAI ANIS	10	1	KAMPEMBA	2002-06-20	2800	0	0	0	0		2		0	0	2014-10-16	12	12.1	4	33	41.3	41	41.15	153.4	153.4	153.4	68.5	68.5	68.5	17.4872	117	117	115	117	116	116	91	62	81	76.5	86	71.5	99	85	90	94
1945	FM	F	0	BAHAI ANIS	10	1	KAMPEMBA	2001-07-27	3800	0	0	0	0		2		0	0	2014-10-16	13	13.1	4	34	47.9	47.9	47.9	150	150	150	73.4	73.4	73.4	21.2889	126	122	125	124	125.5	123.5	86	83	91	84.5	88.5	87	100	97	99	93
1947	KF	F	0	BAHAI ANIS	10	1	KAMPEMBA	2001-01-13	4000	0	0	0	0		2		0	0	2014-10-16	13	13.3	4	33	40.8	40.8	40.8	152.8	152.8	152.8	67	67	67	17.4748	102	100	108	101	105	104	52	63	59	57.5	55.5	61	78	76	77	78
1948	FA	M	1	BAHAI ANIS	10	1	KAMPEMBA	2000-07-10	3600	0	0	0	0		2		0	0	2014-10-16	14	14.1	5	33	39	39	39	160.7	160.5	160.6	65.7	65.7	65.7	15.1208	109	102	110	105.5	109.5	106	63	60	67	61.5	65	63.5	85	75	82	67
1949	KT	F	0	BAHAI ANIS	10	1	KAMPEMBA	2002-04-16	3300	0	0	0	0		2		0	0	2014-10-16	12	12.2	4	33	49.9	49.9	49.9	152.6	152.6	152.6	76.6	76.6	76.6	21.4285	104	101	98	102.5	101	99.5	54	42	53	48	53.5	47.5	73	66	69	66
1950	KN	M	1	BAHAI ANIS	10	1	KAMPEMBA	2000-12-06	2420	0	0	0	0		2		0	0	2014-10-16	13	14	5	33	56	56	56	162.6	162.6	162.6	72.6	72.5	72.55	21.181	127	126	125	126.5	126	125.5	79	68	68	73.5	73.5	68	97	89	94	74
1951	MM	M	1	BAHAI ANIS	10	1	KAMPEMBA	2001-04-02	4600	0	0	0	0		2		0	0	2014-10-16	13	13.2	4	33	40.3	40.3	40.3	146.1	146.1	146.1	65.6	65.6	65.6	18.8801	114	114	115	114	114.5	114.5	61	60	67	60.5	64	63.5	79	79	82	73
1952	MK	F	0	BAHAI ANIS	10	1	KAMPEMBA	2003-11-24	2850	0	0	0	0		2		0	0	2014-10-16	10	10.9	3	33	27.4	27.4	27.4	136.8	136.8	136.8	57	57	57	14.6413	111	135	122	123	116.5	128.5	69	71	71	70	70	71	89	93	89	124
1953	MK	F	0	BAHAI ANIS	12	1	KAMPEMBA	1999-07-01	4000	0	0	0	0		2		0	0	2014-10-16	15	15.1	5	33	57	57	57	160	160	160	74.5	74.5	74.5	22.2656	108	110	107	109	107.5	108.5	60	57	52	58.5	56	54.5	80	74	74	92
1954	MT	F	0	BAHAI ANIS	10	1	KAMPEMBA	2002-05-16	2850	0	0	0	0		2		0	0	2014-10-16	12	12.2	4	34	46	46	46	161.8	161.8	161.8	68	68	68	17.5712	117	113	114	115	115.5	113.5	63	65	58	64	60.5	61.5	85	88	78	86
1955	MB	F	0	BAHAI ANIS	10	1	KAMPEMBA	2000-04-15	3800	0	0	0	0		2		0	0	2014-10-17	14	14.2	5	25	42.7	42.7	42.7	153.6	153.6	153.6	65.1	65.1	65.1	18.0986	105	101	97	103	101	99	70	69	65	69.5	67.5	67	83	80	77	77
1956	LW	M	1	BAHAI ANIS	11	1	KAMPEMBA	1999-10-01	3000	0	0	0	0		2		0	0	2014-10-17	15	15	5	25	49.3	49.3	49.3	157.1	157.1	157.1	69.6	69.6	69.6	19.9754	116	116	110	116	113	113	66	63	49	64.5	57.5	56	82	84	81	77
1957	NM	F	0	BAHAI ANIS	11	1	KAMPEMBA	1999-07-17	3850	0	0	0	0		2		0	0	2014-10-17	15	15.1	5	25	65.3	65.3	65.3	163.1	163.1	163.1	80	80	80	24.5474	129	118	118	123.5	123.5	118	71	73	71	72	71	72	92	87	89	90
1958	SP	F	0	BAHAI ANIS	11	1	KAMPEMBA	2000-03-11	3200	0	0	0	0		2		0	0	2014-10-17	14	14.2	5	25	59.9	59.9	59.9	165.4	165.4	165.4	77	77.2	77.1	21.8955	106	104	102	105	104	103	51	60	58	55.5	54.5	59	76	80	75	90
1959	KM	M	1	BAHAI ANIS	11	1	KAMPEMBA	2001-07-05	4000	0	0	0	0		2		0	0	2014-10-17	13	13.1	4	25	38.5	38.5	38.5	149.8	149.8	149.8	66	66	66	17.1568	117	111	110	114	113.5	110.5	67	68	69	67.5	68	68.5	83	81	83	73
1960	SK	F	0	BAHAI ANIS	11	1	KAMPEMBA	1999-11-03	3800	0	0	0	0		2		0	0	2014-10-17	14	15	5	25	63.2	63.2	63.2	168.1	168.1	168.1	78.3	78.3	78.3	22.3657	110	116	112	113	111	114	70	72	55	71	62.5	63.5	81	91	80	77
1961	KI	F	0	BAHAI ANIS	11	1	KAMPEMBA	2001-10-12	3000	0	0	0	0		2		0	0	2014-10-17	13	13	4	25	34.6	34.6	34.6	159.6	159.6	159.6	62	62.1	62.05	13.5835	106	124	112	115	109	118	68	88	62	78	65	75	84	97	85	86
1963	NK	F	0	BAHAI ANIS	11	1	KAMPEMBA	2000-08-27	3000	0	0	0	0		2		0	0	2014-10-17	14	14	5	26	46	46	46	143.7	134.7	139.2	74.6	74.6	74.6	23.7399	121	122	127	121.5	124	124.5	71	78	70	74.5	70.5	74	99	94	91	79
1964	NI	F	0	BAHAI ANIS	11	1	KAMPEMBA	1999-02-07	3000	0	0	0	0		2		0	0	2014-10-17	15	15.3	5	26	53.8	53.8	53.8	159.9	159.9	159.9	71.9	71.9	71.9	21.0419	111	116	115	113.5	113	115.5	64	62	58	63	61	60	85	82	79	87
1965	UM	M	1	BAHAI ANIS	11	1	KAMPEMBA	1999-11-09	2000	0	0	0	0		2		0	0	2014-10-17	14	15	5	26	59.5	59.5	59.5	169	169	169	76	76	76	20.8326	107	108	110	107.5	108.5	109	75	67	58	71	66.5	62.5	87	84	82	68
1966	MT	M	1	BAHAI ANIS	10	1	KAMPEMBA	2003-09-12	2900	0	0	0	0		2		0	0	2014-10-17	11	11	4	26	44.8	44.8	44.8	149.1	149.1	149.1	69.2	69	69.1	20.1522	120	108	110	114	115	109	66	79	62	72.5	64	70.5	87	87	82	84
1967	LB	F	0	BAHAI ANIS	11	1	KAMPEMBA	1997-06-26	3850	0	0	0	0		2		0	0	2014-10-17	17	17.1	5	26	48.9	48.9	48.9	153.3	153.3	153.3	71.6	71.6	71.6	20.8077	118	121	119	119.5	118.5	120	70	74	67	72	68.5	70.5	94	88	85	86
1968	MM	M	1	BAHAI ANIS	10	1	KAMPEMBA	2002-12-08	4000	0	0	0	0		2		0	0	2014-10-17	11	12	4	26	54.9	54.9	54.9	159.3	159.3	159.3	72.5	72.5	72.5	21.6342	123	121	120	122	121.5	120.5	66	72	67	69	66.5	69.5	94	91	83	73
1969	NM	M	1	BAHAI ANIS	11	1	KAMPEMBA	2000-08-09	3000	0	0	0	0		2		0	0	2014-10-17	14	14.1	5	26	50.6	50.6	50.6	169.2	169.2	169.2	74.9	74.9	74.9	17.6746	112	115	118	113.5	115	116.5	70	61	61	65.5	65.5	61	86	82	82	67
1970	BI	F	0	BAHAI ANIS	11	1	KAMPEMBA	2000-09-03	3000	0	0	0	0		2		0	0	2014-10-17	14	14.1	5	26	46.4	46.4	46.4	156.1	156.1	156.1	68	68	68	19.042	118	115	113	116.5	115.5	114	75	80	74	77.5	74.5	77	90	95	92	76
1971	KN	M	1	BAHAI ANIS	11	1	KAMPEMBA	2002-05-13	3200	0	0	0	0		2		0	0	2014-10-17	12	12.2	4	26	33.4	33.4	33.4	136.2	136.2	136.2	65.3	65.3	65.3	18.005	121	114	111	117.5	116	112.5	72	75	69	73.5	70.5	72	89	85	84	93
1972	KM	M	1	BAHAI ANIS	11	1	KAMPEMBA	2001-11-13	3500	0	0	0	0		2		0	0	2014-10-17	12	13	4	26	48.4	48.4	48.4	150.3	150.3	150.3	69.8	69.8	69.8	21.4253	114	114	111	114	112.5	112.5	66	71	71	68.5	68.5	71	87	85	84	70
1973	MM	F	0	BAHAI ANIS	11	1	KAMPEMBA	2000-12-23	2300	0	0	0	0		2		0	0	2014-10-17	13	13.9	4	26	43	43	43	158.3	158.3	158.3	68.2	68.2	68.2	17.1596	111	123	104	117	107.5	113.5	54	64	50	59	52	57	78	106	71	63
1974	ZA	F	0	BAHAI ANIS	11	1	KAMPEMBA	1999-04-17	2800	0	0	0	0		2		0	0	2014-10-17	15	15.2	5	26	52.2	52.2	52.2	155.3	155.3	155.3	77	77	77	21.6435	109	104	101	106.5	105	102.5	71	54	62	62.5	66.5	58	84	78	74	82
1975	MB	F	0	BAHAI ANIS	11	1	KAMPEMBA	2002-01-13	3300	0	0	0	0		2		0	0	2014-10-17	12	12.3	4	26	36.7	36.7	36.7	147.4	147.4	147.4	66.1	66.1	66.1	16.8916	100	106	106	103	103	106	57	67	61	62	59	64	73	83	78	97
1976	KK	M	1	BAHAI ANIS	11	1	KAMPEMBA	1998-03-19	2000	0	0	0	0		2		0	0	2014-10-17	16	16.2	5	27	49.1	49.1	49.1	162.6	162.6	162.6	70	70	70	18.5712	114	111	105	112.5	109.5	108	67	61	48	64	57.5	54.5	82	84	71	86
1977	MM	F	0	BAHAI ANIS	11	1	KAMPEMBA	1999-06-19	3300	0	0	0	0		2		0	0	2014-10-17	15	15.1	5	27	48.4	48.4	48.4	151.5	151.5	151.5	70.7	70.7	70.7	21.0873	110	117	114	113.5	112	115.5	68	73	64	70.5	66	68.5	86	87	82	90
1978	EM	M	1	BAHAI ANIS	11	1	KAMPEMBA	1998-04-26	2000	0	0	0	0		2		0	0	2014-10-17	16	16.2	5	27	62.9	62.3	62.6	170.4	170.4	170.4	74.3	74.3	74.3	21.5593	108	118	118	113	113	118	72	80	69	76	70.5	74.5	90	90	87	64
1979	IM	M	1	BAHAI ANIS	11	1	KAMPEMBA	1998-04-19	3000	0	0	0	0		2		0	0	2014-10-17	16	16.2	5	27	54.3	54.3	54.3	160.7	160.7	160.7	73	73	73	21.0266	119	118	126	118.5	122.5	122	70	70	61	70	65.5	65.5	83	90	83	78
1980	KK	F	0	BAHAI ANIS	11	1	KAMPEMBA	2000-06-27	2800	0	0	0	0		2		0	0	2014-10-17	14	14.1	5	27	64.3	64.3	64.3	169	169	169	78.4	78.4	78.4	22.5132	112	108	116	110	114	112	69	61	65	65	67	63	86	79	85	86
1981	MM	F	0	BAHAI ANIS	11	1	KAMPEMBA	1998-11-19	3120	0	0	0	0		2		0	0	2014-10-17	15	16	5	26	60.9	60.9	60.9	155.7	155.7	155.7	82.1	82.1	82.1	25.1212	130	126	120	128	125	123	61	77	58	69	59.5	67.5	83	88	80	84
1982	MV	F	0	BAHAI ANIS	11	1	KAMPEMBA	2002-05-25	3000	0	0	0	0		2		0	0	2014-10-17	12	12.1	4	26	40.8	40.6	40.7	148.4	148.4	148.4	68.3	68.3	68.3	18.481	107	101	97	104	102	99	61	63	57	62	59	60	77	79	75	86
1983	SA	F	0	BAHAI ANIS	11	1	KAMPEMBA	2002-05-01	3400	0	0	0	0		2		0	0	2014-10-17	12	12.2	4	26	41.9	41.9	41.9	148.1	148.1	148.1	73.1	73.1	73.1	19.1031	119	114	106	116.5	112.5	110	68	63	63	65.5	65.5	63	91	82	78	97
1984	IM	M	1	BAHAI ANIS	11	1	KAMPEMBA	2002-02-15	3200	0	0	0	0		2		0	0	2014-10-17	12	12.2	4	26	35.7	35.6	35.65	142.9	142.9	142.9	67.9	67.9	67.9	17.458	112	102	114	107	113	108	70	68	61	69	65.5	64.5	87	80	76	91
1985	KM	F	0	BAHAI ANIS	11	1	KAMPEMBA	2000-02-25	3460	0	0	0	0		2		0	0	2014-10-17	14	14.2	5	26	61.2	61.2	61.2	166.6	166.6	166.6	79.4	79.4	79.4	22.0496	111	117	118	114	114.5	117.5	70	69	74	69.5	72	71.5	88	91	89	65
1986	MJ	M	1	BAHAI ANIS	11	1	KAMPEMBA	2002-01-01	2400	0	0	0	0		2		0	0	2014-10-17	12	12.3	4	26	40.1	40.1	40.1	148.2	148.2	148.2	65.1	65.1	65.1	18.2578	107	104	103	105.5	105	103.5	65	56	62	60.5	63.5	59	80	76	79	79
1987	TT	M	1	BAHAI ANIS	11	1	KAMPEMBA	1999-06-01	3500	0	0	0	0		2		1	0	2014-10-17	15	15.2	5	26	64.7	64.7	64.7	162.1	162.1	162.1	78.1	78.1	78.1	24.6228	120	136	118	128	119	127	93	77	76	85	84.5	76.5	106	102	91	82
1988	MK	F	0	BAHAI ANIS	11	1	KAMPEMBA	2000-09-10	2800	0	0	0	0		2		0	0	2014-10-17	14	14	5	26	55.6	55.6	55.6	163.3	163.3	163.3	73.1	73.1	73.1	20.8498	118	116	114	117	116	115	68	66	57	67	62.5	61.5	85	80	80	76
1989	KT	F	0	BAHAI ANIS	11	1	KAMPEMBA	2000-12-13	4000	0	0	0	0		2		0	0	2014-10-17	13	14	5	26	74	74.1	74.05	169.6	169.6	169.6	84.8	84.8	84.8	25.7438	117	133	124	125	120.5	128.5	77	57	52	67	64.5	54.5	90	82	75	77
1990	KN	M	1	BAHAI ANIS	11	1	KAMPEMBA	2000-05-12	3850	0	0	0	0		2		0	0	2014-10-17	14	14.2	5	26	55.7	55.7	55.7	160.3	160.3	160.3	73.1	73.1	73.1	21.6764	110	105	112	107.5	111	108.5	75	74	65	74.5	70	69.5	93	91	90	86
1991	TT	M	1	BAHAI ANIS	11	1	KAMPEMBA	2000-08-03	2950	0	0	0	0		2		0	0	2014-10-17	14	14.1	5	26	44.2	44.2	44.2	159.8	159.8	159.8	67.4	67.4	67.4	17.3089	126	125	127	125.5	126.5	126	71	69	75	70	73	72	103	98	98	102
1992	KK	M	1	BAHAI ANIS	11	1	KAMPEMBA	1999-07-13	3000	0	0	0	0		2		0	0	2014-10-17	15	15.1	5	26	55.3	55.3	55.3	177.1	177.1	177.1	81.9	81.9	81.9	17.6314	115	119	119	117	117	119	43	55	58	49	50.5	56.5	79	80	76	77
1993	MK	M	1	BAHAI ANIS	11	1	KAMPEMBA	2001-01-17	3950	0	0	0	0		2		0	0	2014-10-17	13	13.3	4	26	50.5	50.5	50.5	160.9	160.9	160.9	73.4	73.4	73.4	19.5065	121	139	132	130	126.5	135.5	74	83	70	78.5	72	76.5	104	105	91	86
1994	MM	M	1	BAHAI ANIS	11	1	KAMPEMBA	2001-01-10	4460	0	0	0	0		2		0	1	2014-10-17	13	13.3	4	26	54	54	54	163.5	163.5	163.5	72.6	72.6	72.6	20.2003	126	134	128	130	127	131	80	76	80	78	80	78	100	101	104	96
1995	SA	F	0	BAHAI ANIS	10	1	KAMPEMBA	2002-04-09	2300	0	0	0	0		2		0	0	2014-10-17	12	12.2	4	26	28.1	28.1	28.1	136.8	136.8	136.8	56.4	56.4	56.4	15.0153	111	110	118	110.5	114.5	114	62	64	58	63	60	61	82	83	78	71
1996	NK	F	0	BAHAI ANIS	11	1	KAMPEMBA	2001-06-22	2650	0	0	0	0		2		0	0	2014-10-17	13	13.1	4	26	51.4	51.4	51.4	158.3	158.3	158.3	75.9	75.9	75.9	20.5117	133	130	112	131.5	122.5	121	91	78	75	84.5	83	76.5	107	96	85	113
1997	KK	M	1	BAHAI ANIS	11	1	KAMPEMBA	2002-05-26	3600	0	0	0	0		2		1	1	2014-10-17	12	12.1	4	26	33.5	33.5	33.5	137.9	137.9	137.9	63.1	63.1	63.1	17.6164	93	91	97	92	95	94	57	51	59	54	58	55	72	68	74	55
1998	MS	F	0	BAHAI ANIS	11	1	KAMPEMBA	2001-06-01	3000	0	0	0	0		2		0	0	2014-10-17	13	13.2	4	26	51.4	51.4	51.4	156.9	156.9	156.9	79.1	79.1	79.1	20.8794	104	103	101	103.5	102.5	102	73	66	65	69.5	69	65.5	82	80	80	80
1999	ED	M	1	BAHAI ANIS	11	1	KAMPEMBA	2000-10-29	#NULL!	0	0	0	0		2		0	0	2014-10-17	13	14	5	26	33.4	33.4	33.4	145.6	145.6	145.6	62.7	62.7	62.7	15.7552	89	105	101	97	95	103	56	53	70	54.5	63	61.5	68	73	79	85
2000	SK	F	0	BAHAI ANIS	11	1	KAMPEMBA	2000-05-14	2750	0	0	0	0		2		0	0	2014-10-17	14	14.2	5	25	44.7	44.7	44.7	155.6	155.6	155.6	69.5	69.5	69.5	18.4624	122	125	118	123.5	120	121.5	63	61	55	62	59	58	81	86	80	81
2001	AM	M	1	LA RACINE IWE	4	1	KAMPEMBA	2008-12-28	2000	0	0	0	0		2		0	0	2014-11-04	5	5.9	2	32	20.5	20.5	20.5	120	120	120	57	57	57	14.2361	89	94	94	91.5	91.5	94	64	58	55	61	59.5	56.5	71	73	71	86
2002	MJ	F	0	LA RACINE IWE	7	1	KAMPEMBA	2005-01-01	#NULL!	0	0	0	0		2		0	0	2014-11-04	9	9.3	3	28	25.8	25.8	25.8	143	143	143	58.1	58.1	58.1	12.6168	103	114	131	108.5	117	122.5	73	69	69	71	71	69	89	87	84	100
2003	FM	M	1	LA RACINE IWE	9	1	KAMPEMBA	2002-04-27	#NULL!	0	0	0	0		2		0	0	2014-11-04	12	12.1	4	30	32.8	32.8	32.8	153.2	153.2	153.2	63.1	63.1	63.1	13.9751	95	114	107	104.5	101	110.5	72	52	54	62	63	53	81	71	80	81
2004	MM	M	1	LA RACINE IWE	4	1	KAMPEMBA	2008-06-08	2800	0	0	0	0		2		0	0	2014-10-31	6	6.2	2	32	20.5	20.5	20.5	123.9	123.9	123.9	55	55	55	13.354	120	112	108	116	114	110	80	70	61	75	70.5	65.5	90	82	81	106
2005	KM	M	1	LA RACINE IWE	5	1	KAMPEMBA	2008-10-23	2000	0	0	0	0		2		0	0	2014-10-31	6	6	2	30	16.9	16.9	16.9	109	109	109	54.1	54.1	54.1	14.2244	96	90	94	93	95	92	44	54	55	49	49.5	54.5	63	72	73	88
2006	MM	M	1	LA RACINE IWE	4	1	KAMPEMBA	2008-04-06	3000	0	0	0	0		2		0	0	2014-10-31	6	6.2	2	32	16.3	16.3	16.3	112.2	112.2	112.2	57.1	57.1	57.1	12.948	88	91	100	89.5	94	95.5	55	57	51	56	53	54	71	71	70	62
2007	MY	M	1	LA RACINE IWE	4	1	KAMPEMBA	2006-11-05	3800	0	0	0	0		2		0	0	2014-10-31	7	8	3	32	26.4	26.4	26.4	119.2	119.2	119.2	57.3	57.3	57.3	18.5802	101	97	97	99	99	97	69	52	53	60.5	61	52.5	79	74	68	92
2008	KN	M	1	LA RACINE IWE	4	1	KAMPEMBA	2008-10-17	4300	0	0	0	0		2		0	0	2014-11-03	6	6	2	32	16.3	16.3	16.3	100	100	100	58	58	58	16.3	104	103	89	103.5	96.5	96	76	62	57	69	66.5	59.5	87	78	70	110
2009	JT	M	1	LA RACINE IWE	4	1	KAMPEMBA	2009-10-01	4500	0	0	0	0		2		0	1	2014-10-31	5	5.1	2	32	19.3	19.3	19.3	107.2	107.2	107.2	57	57	57	16.7945	103	95	90	99	96.5	92.5	48	60	53	54	50.5	56.5	71	72	67	92
2010	ZM	M	1	LA RACINE IWE	8	1	KAMPEMBA	2005-07-06	2500	0	0	0	0		2		0	0	2014-10-29	9	9.2	3	30	25.2	25.3	25.25	124.3	124.3	124.3	53.1	53.1	53.1	16.3425	102	97	98	99.5	100	97.5	63	66	58	64.5	60.5	62	82	79	71	94
2011	NK	F	0	LA RACINE IWE	8	1	KAMPEMBA	2005-02-15	2970	0	0	0	0		2		0	0	2014-10-29	9	9.3	3	30	27.6	27.6	27.6	134.2	134.2	134.2	64.3	64.3	64.3	15.3251	123	131	126	127	124.5	128.5	77	61	52	69	64.5	56.5	93	82	87	92
2012	KK	F	0	LA RACINE IWE	8	1	KAMPEMBA	2005-12-10	3000	0	0	0	0		2		0	0	2014-10-29	8	9	3	30	31.8	31.8	31.8	139	139	139	59	59	59	16.4588	111	116	104	113.5	107.5	110	66	70	64	68	65	67	86	84	83	83
2013	MM	F	0	LA RACINE IWE	8	1	KAMPEMBA	2004-12-01	3000	0	0	0	0		2		0	0	2014-10-29	9	10	3	30	38.4	38.4	38.4	143	143	143	66	66	66	18.7784	94	99	93	96.5	93.5	96	46	41	53	43.5	49.5	47	74	73	77	56
2014	KT	F	0	LA RACINE IWE	8	1	KAMPEMBA	2002-10-25	2500	0	0	0	0		2		0	0	2014-10-29	12	12	4	30	44.9	44.9	44.9	156	156	156	66	66	66	18.45	93	103	98	98	95.5	100.5	63	61	54	62	58.5	57.5	73	75	72	74
2015	AV	F	0	LA RACINE IWE	7	1	KAMPEMBA	2006-10-02	2500	0	0	0	0		2		0	0	2014-10-30	8	8.1	3	30	24.7	24.7	24.7	122.3	122.3	122.3	60	60	60	16.5137	97	92	91	94.5	94	91.5	58	67	46	62.5	52	56.5	76	75	67	71
2016	NK	M	1	LA RACINE IWE	7	1	KAMPEMBA	2003-10-05	2500	0	0	0	0		2		0	0	2014-10-30	11	11.1	4	30	27.3	27.3	27.3	126.4	126.4	126.4	58	58	58	17.0871	105	104	101	104.5	103	102.5	68	55	69	61.5	68.5	62	83	84	80	77
2017	FT	F	0	LA RACINE IWE	7	1	KAMPEMBA	2004-08-16	2500	0	0	0	0		2		0	0	2014-10-30	10	10.1	3	30	27.7	27.7	27.7	129.9	129.9	129.9	61	61	61	16.4158	101	108	101	104.5	101	104.5	65	72	66	68.5	65.5	69	76	83	83	75
2018	TM	M	1	LA RACINE IWE	7	1	KAMPEMBA	2004-09-01	3950	0	0	0	0		2		0	1	2014-10-30	10	10.1	3	30	27.1	27.1	27.1	133	133	133	61	61	61	15.3203	114	116	111	115	112.5	113.5	59	67	62	63	60.5	64.5	96	87	81	110
2019	KM	F	0	LA RACINE IWE	7	1	KAMPEMBA	2003-08-17	#NULL!	0	0	0	0		2		0	0	2014-10-30	11	11.1	4	30	32	32	32	132.3	132.3	132.3	68	68	68	18.2823	121	96	102	108.5	111.5	99	68	63	69	65.5	68.5	66	87	77	82	94
2020	NB	F	0	LA RACINE IWE	4	1	KAMPEMBA	2008-07-10	3100	0	0	0	0		2		0	0	2014-11-03	6	6.1	2	30	19.4	19.4	19.4	116	116	116	58	58	58	14.4174	86	87	84	86.5	85	85.5	56	55	52	55.5	54	53.5	67	68	65	91
2021	KL	M	1	LA RACINE IWE	4	1	KAMPEMBA	2007-06-04	3700	0	0	0	0		2		0	0	2014-11-03	7	7.1	3	32	18	18	18	113.9	113.9	113.9	55	55	55	13.8747	111	112	105	111.5	108	108.5	71	69	54	70	62.5	61.5	82	92	74	102
2022	NK	M	1	LA RACINE IWE	5	1	KAMPEMBA	2007-09-03	3500	0	0	0	0		2		0	1	2014-10-31	7	7.1	3	30	20.2	20.2	20.2	117	117	117	59	59	59	14.7564	110	93	97	101.5	103.5	95	67	65	59	66	63	62	87	80	76	90
2023	SK	F	0	LA RACINE IWE	5	1	KAMPEMBA	2008-03-09	3200	0	0	0	0		2		0	0	2014-10-31	6	6.3	2	30	21	21	21	118.2	118.2	118.2	57	57	57	15.0309	99	101	100	100	99.5	100.5	53	63	51	58	52	57	75	77	70	91
2024	YD	M	1	LA RACINE IWE	5	1	KAMPEMBA	2008-10-07	1650	0	0	0	0		2		0	0	2014-10-31	6	6.1	2	30	20.4	20.4	20.4	114.2	114.2	114.2	56	56	56	15.6422	106	101	101	103.5	103.5	101	52	59	64	55.5	58	61.5	77	75	75	74
2025	KQ	M	1	LA RACINE IWE	5	1	KAMPEMBA	2005-03-03	3800	0	0	0	0		2		0	0	2014-10-31	9	9.3	3	30	22.9	22.9	22.9	117.2	117.2	117.2	57	57	57	16.6717	99	98	89	98.5	94	93.5	64	58	60	61	62	59	81	73	73	85
2026	ZM	F	0	LA RACINE IWE	5	1	KAMPEMBA	2008-05-06	2500	0	0	0	0		2		0	0	2014-10-31	6	6.2	2	30	19.8	19.8	19.8	115.4	115.4	115.4	54	54	54	14.868	96	93	102	94.5	99	97.5	40	66	57	53	48.5	61.5	65	83	74	73
2027	MM	M	1	LA RACINE IWE	5	1	KAMPEMBA	2006-04-17	2500	0	0	0	0		2		0	0	2014-10-31	8	8.2	3	30	21.2	21.2	21.2	121.2	121.2	121.2	55	55	55	14.4321	118	102	99	110	108.5	100.5	72	66	62	69	67	64	88	81	79	95
2028	KJ	M	1	LA RACINE IWE	5	1	KAMPEMBA	2007-06-01	3500	0	0	0	0		2		0	0	2014-10-31	7	7.2	3	30	27.8	27.8	27.8	126.4	126.4	126.4	62.1	62.1	62.1	17.4001	117	96	98	106.5	107.5	97	71	63	69	67	70	66	82	78	77	90
2029	KI	F	0	LA RACINE IWE	5	1	KAMPEMBA	2008-03-02	2500	0	0	0	0		2		0	0	2014-10-31	6	6.3	2	30	24.5	24.5	24.5	113.8	113.8	113.8	60	60	60	18.9183	90	122	125	106	107.5	123.5	70	63	69	66.5	69.5	66	81	87	93	126
2030	DN	M	1	LA RACINE IWE	5	1	KAMPEMBA	2007-07-01	2700	0	0	0	0		2		0	0	2014-10-31	7	7.2	3	30	24.4	24.4	24.4	122.1	122.1	122.1	61	61	61	16.3666	112	113	105	112.5	108.5	109	75	71	72	73	73.5	71.5	87	87	85	110
2031	DC	M	1	LA RACINE IWE	6	1	KAMPEMBA	2006-07-23	3300	0	0	0	0		2		0	0	2014-10-31	8	8.1	3	30	24.5	24.5	24.5	126.7	126.7	126.7	57	57	57	15.262	118	101	97	109.5	107.5	99	72	63	58	67.5	65	60.5	94	77	72	81
2032	LF	F	0	LA RACINE IWE	6	1	KAMPEMBA	2007-07-25	#NULL!	0	0	0	0		2		0	0	2014-10-31	7	7.1	3	30	22.6	22.6	22.6	122.2	122.2	122.2	55	55	55	15.1344	92	94	94	93	93	94	59	58	55	58.5	57	56.5	76	70	74	95
2033	IB	F	0	LA RACINE IWE	5	1	KAMPEMBA	2006-02-18	2000	0	0	0	0		2		0	0	2014-10-31	8	8.3	3	30	23.3	23.3	23.3	119.5	119.5	119.5	58	58	58	16.3162	121	122	119	121.5	120	120.5	73	70	71	71.5	72	70.5	96	89	87	111
2034	NM	F	0	LA RACINE IWE	6	1	KAMPEMBA	2006-05-01	#NULL!	0	0	0	0		2		0	0	2014-10-31	8	8.2	3	30	24.7	24.7	24.7	126.5	126.5	126.5	57	57	57	15.4353	88	92	98	90	93	95	50	53	63	51.5	56.5	58	67	69	77	111
2035	MN	F	0	LA RACINE IWE	6	1	KAMPEMBA	2007-01-13	2800	0	0	0	0		2		0	0	2014-10-31	7	7.3	3	30	22.4	22.4	22.4	124.3	124.3	124.3	55	55	55	14.4979	111	101	98	106	104.5	99.5	69	63	77	66	73	70	85	77	83	84
2036	KK	M	1	LA RACINE IWE	6	1	KAMPEMBA	2006-09-22	3500	0	0	0	0		2		0	0	2014-10-31	8	8.1	3	30	23.9	23.9	23.9	127	127	127	56	56	56	14.818	99	95	97	97	98	96	66	61	63	63.5	64.5	62	79	75	75	86
2037	RM	F	0	LA RACINE IWE	9	1	KAMPEMBA	2003-08-30	#NULL!	0	0	0	0		2		0	0	2014-11-04	11	11	4	30	31.7	31.7	31.7	153.1	153.1	153.1	60	60	60	13.5241	115	117	111	116	113	114	56	72	61	64	58.5	66.5	79	90	76	99
2038	NM	M	1	LA RACINE IWE	6	1	KAMPEMBA	2003-11-01	3000	0	0	0	0		2		0	0	2014-10-31	10	11.1	4	30	28.7	28.7	28.7	138.5	138.5	138.5	58	58	58	14.9617	113	112	117	112.5	115	114.5	77	70	68	73.5	72.5	69	97	85	89	72
2039	BE	F	0	LA RACINE IWE	6	1	KAMPEMBA	2002-09-01	2300	0	0	0	0		2		0	0	2014-10-31	12	12.1	4	30	34.6	34.6	34.6	132	132	132	62	62	62	19.8577	120	114	115	117	117.5	114.5	66	65	60	65.5	63	62.5	87	82	81	86
2040	DM	M	1	LA RACINE IWE	6	1	KAMPEMBA	2007-06-23	4000	0	0	0	0		2		0	0	2014-10-31	7	7.1	3	30	21.7	21.7	21.7	118.5	118.5	118.5	54	54	54	15.4534	93	85	96	89	94.5	90.5	60	48	48	54	54	48	74	65	67	90
2041	KM	F	0	LA RACINE IWE	8	1	KAMPEMBA	2004-12-30	3600	0	0	0	0		2		0	0	2014-10-29	9	9.9	3	30	30	30	30	137.5	137.5	137.5	58	58	58	15.8678	112	112	119	112	115.5	115.5	80	70	63	75	71.5	66.5	89	86	84	76
2042	MM	F	0	LA RACINE IWE	8	1	KAMPEMBA	2002-05-01	#NULL!	0	0	0	0		2		0	0	2014-11-04	12	12.2	4	28	40.9	40.9	40.9	153.8	153.8	153.8	67	67	67	17.2906	117	118	132	117.5	124.5	125	65	66	85	65.5	75	75.5	90	85	97	92
2043	OL	M	1	LA RACINE IWE	6	1	KAMPEMBA	2007-12-01	3000	0	0	0	0		2		0	0	2014-10-31	6	7	3	30	19.2	19.2	19.2	117.7	117.7	117.7	50	50	50	13.8595	91	91	91	91	91	91	46	53	48	49.5	47	50.5	65	65	65	84
2044	NK	F	0	LA RACINE IWE	6	1	KAMPEMBA	2003-12-07	1900	0	0	0	0		2		0	0	2014-10-31	10	11	4	30	29.2	29.2	29.2	135.4	135.4	135.4	58	58	58	15.9274	116	111	105	113.5	110.5	108	70	70	58	70	64	64	90	87	79	91
2045	MM	M	1	LA RACINE IWE	6	1	KAMPEMBA	2006-01-01	4200	0	0	0	0		2		0	1	2014-10-31	8	8.4	3	30	23.5	23.5	23.5	125	125	125	56	56	56	15.04	113	111	113	112	113	112	58	68	61	63	59.5	64.5	82	82	82	112
2046	ZS	F	0	LA RACINE IWE	6	1	KAMPEMBA	2005-06-02	3500	0	0	0	0		2		0	0	2014-10-31	9	9.2	3	30	24.2	24.2	24.2	131.5	131.5	131.5	54	54	54	13.9947	103	91	97	97	100	94	71	60	61	65.5	66	60.5	81	79	78	86
2047	NL	M	1	LA RACINE IWE	6	1	KAMPEMBA	2007-11-26	3800	0	0	0	0		2		0	0	2014-10-31	6	7	3	30	23.8	23.8	23.8	125.8	125.8	125.8	54	54	54	15.0389	98	93	95	95.5	96.5	94	47	56	52	51.5	49.5	54	66	68	68	102
2048	LF	M	1	LA RACINE IWE	5	1	KAMPEMBA	2007-11-27	3500	0	0	0	0		2		0	0	2014-10-31	6	7	3	30	25	25	25	124.2	124.2	124.2	58	58	58	16.2068	97	104	101	100.5	99	102.5	65	70	60	67.5	62.5	65	81	83	76	99
2049	IL	M	1	LA RACINE IWE	7	1	KAMPEMBA	2004-06-12	#NULL!	0	0	0	0		2		0	0	2014-10-30	10	10.2	3	30	25.9	25.9	25.9	125.7	125.7	125.7	56	56	56	16.3919	107	104	114	105.5	110.5	109	64	60	57	62	60.5	58.5	83	78	81	90
2050	MA	M	1	LA RACINE IWE	7	1	KAMPEMBA	2002-07-17	3000	0	0	0	0		2		0	0	2014-10-30	12	12.1	4	30	28	28	28	137	137	137	60	60	60	14.9182	102	105	100	103.5	101	102.5	66	62	57	64	61.5	59.5	80	78	76	81
2051	KO	M	1	LA RACINE IWE	7	1	KAMPEMBA	2005-02-01	#NULL!	0	0	0	0		2		0	0	2014-10-30	9	9.3	3	30	23.7	23.7	23.7	124.9	124.9	124.9	57	57	57	15.1923	118	109	109	113.5	113.5	109	63	68	59	65.5	61	63.5	94	83	80	92
2052	IN	F	0	LA RACINE IWE	8	1	KAMPEMBA	2003-12-25	2500	0	0	0	0		2		0	0	2014-10-29	10	11	4	30	40.4	40.4	40.4	153.3	153.3	153.3	61.1	61.1	61.1	17.1908	105	107	115	106	110	111	67	80	60	73.5	63.5	70	80	86	80	67
2053	KB	F	0	LA RACINE IWE	8	1	KAMPEMBA	2004-12-24	2500	0	0	0	0		2		0	0	2014-10-29	9	10	3	30	30.2	30.1	30.15	131	131	131	64	64	64	17.5689	113	106	109	109.5	111	107.5	65	67	66	66	65.5	66.5	83	79	81	92
2054	MN	M	1	LA RACINE IWE	8	1	KAMPEMBA	2004-05-05	3000	0	0	0	1	HERNIE	2		0	0	2014-10-29	10	10.2	3	30	33.1	33.1	33.1	138.2	138.2	138.2	62	62	62	17.3305	116	119	112	117.5	114	115.5	72	71	73	71.5	72.5	72	96	89	88	90
2055	TN	F	0	LA RACINE IWE	7	1	KAMPEMBA	2006-10-22	3900	0	0	0	0		2		0	0	2014-10-30	8	8	3	30	29.1	29.1	29.1	132.4	132.4	132.4	64	64	64	16.6003	104	104	102	104	103	103	64	52	58	58	61	55	81	72	74	73
2056	NN	M	1	LA RACINE IWE	4	1	KAMPEMBA	2008-05-23	3000	0	0	0	0		2		0	0	2014-10-31	6	6.2	2	32	17.6	17.6	17.6	110	110	110	53	53	53	14.5455	109	107	97	108	103	102	59	58	63	58.5	61	60.5	72	80	77	96
2057	TY	M	1	LA RACINE IWE	4	1	KAMPEMBA	2008-12-25	4100	0	0	0	0		2		0	0	2014-10-31	5	6	2	32	19.8	19.8	19.8	111.7	111.7	111.7	55.2	55.2	55.2	15.8693	102	117	97	109.5	99.5	107	73	61	62	67	67.5	61.5	79	76	78	94
2058	ES	M	1	LA RACINE IWE	4	1	KAMPEMBA	2008-03-15	3500	0	0	0	0		2		0	0	2014-10-31	6	6.3	2	32	16.8	16.8	16.8	118.2	118.2	118.2	53	53	53	12.0247	118	126	125	122	121.5	125.5	77	69	77	73	77	73	104	97	90	100
2059	MM	M	1	LA RACINE IWE	4	1	KAMPEMBA	2008-07-30	3500	0	0	0	0		2		1	0	2014-11-03	6	6	2	32	16.8	16.8	16.8	108.3	108.3	108.3	57	57	57	14.3236	99	87	89	93	94	88	55	59	63	57	59	61	74	71	73	105
2060	NB	M	1	LA RACINE IWE	4	1	KAMPEMBA	2008-09-11	4300	0	0	0	0		2		0	0	2014-10-31	6	6.1	2	32	16.3	16.3	16.3	107.1	107.1	107.1	53.2	53.2	53.2	14.2105	80	78	86	79	83	82	50	53	48	51.5	49	50.5	61	60	60	80
2061	SA	M	1	LA RACINE IWE	4	1	KAMPEMBA	2008-04-20	2800	0	0	0	0		2		0	0	2014-11-03	6	6.2	2	32	18.4	18.4	18.4	114	114	114	53	53	53	14.1582	81	106	89	93.5	85	97.5	60	59	56	59.5	58	57.5	68	73	67	78
2062	LK	M	1	LA RACINE IWE	5	1	KAMPEMBA	2007-03-02	3000	0	0	0	0		2		0	0	2014-10-31	7	7.3	3	30	18.1	18.1	18.1	116.2	116.2	116.2	57	57	57	13.405	88	82	83	85	85.5	82.5	54	52	51	53	52.5	51.5	64	60	61	88
2063	MK	F	0	LA RACINE IWE	4	1	KAMPEMBA	2008-03-29	2900	0	0	0	0		2		0	0	2014-10-31	6	6.2	2	32	22	22	22	123.9	123.9	123.9	59	59	59	14.3311	112	113	106	112.5	109	109.5	72	69	62	70.5	67	65.5	83	91	74	103
2064	NB	F	0	LA RACINE IWE	4	1	KAMPEMBA	2006-08-16	3700	0	0	0	0		2		0	0	2014-11-03	8	8.1	3	30	21	21	21	120	120	120	59	59	59	14.5833	104	100	92	102	98	96	70	71	58	70.5	64	64.5	85	80	67	70
2065	NA	F	0	LA RACINE IWE	8	1	KAMPEMBA	2005-10-11	3600	0	0	0	0		2		0	0	2014-10-29	9	9	3	30	31.9	31.9	31.9	139.6	139.6	139.6	63	63	63	16.3689	112	118	118	115	115	118	69	89	76	79	72.5	82.5	83	99	91	105
2066	YK	F	0	LA RACINE IWE	8	1	KAMPEMBA	2004-10-23	3100	0	0	0	0		2		0	0	2014-10-29	10	10	3	30	34.5	34.5	34.5	141.8	141.8	141.8	66	66	66	17.158	113	107	109	110	111	108	74	68	59	71	66.5	63.5	93	76	75	95
2067	LN	F	0	LA RACINE IWE	7	1	KAMPEMBA	2005-08-01	3200	0	0	0	0		2		0	0	2014-10-30	9	9.1	3	30	29.4	29.4	29.4	136	136	136	62	62	62	15.8953	108	101	102	104.5	105	101.5	71	69	61	70	66	65	90	85	79	77
2068	SM	F	0	LA RACINE IWE	9	1	KAMPEMBA	2003-03-14	#NULL!	0	0	0	0		2		0	0	2014-10-29	11	11.3	4	27	38.2	38.2	38.2	153.3	153.3	153.3	61	61	61	16.2547	104	103	106	103.5	105	104.5	63	61	67	62	65	64	81	77	78	75
2069	NK	M	1	LA RACINE IWE	8	1	KAMPEMBA	2003-06-21	2000	0	0	0	0		2		0	0	2014-10-29	11	11.1	4	30	39.7	39.7	39.7	154.3	154.3	154.3	63.2	63.2	63.2	16.6747	104	100	106	102	105	103	71	64	59	67.5	65	61.5	90	79	76	84
2070	YM	M	1	LA RACINE IWE	9	1	KAMPEMBA	2002-02-28	3100	0	0	0	0		2		0	0	2014-10-29	12	12.2	4	27	36.5	36.5	36.5	143.1	143.1	143.1	64	64	64	17.8243	102	95	95	98.5	98.5	95	59	50	68	54.5	63.5	59	76	70	74	83
2071	AN	F	0	LA RACINE IWE	9	1	KAMPEMBA	2002-01-06	3542	0	0	0	0		2		0	0	2014-10-22	12	12.3	4	27	49.7	49.7	49.7	154	154	154	70	70	70	20.9563	122	114	114	118	118	114	75	73	69	74	72	71	94	90	87	102
2072	BK	F	0	LA RACINE IWE	9	1	KAMPEMBA	2003-06-01	3500	0	0	0	0		2		0	0	2014-10-29	11	11.2	4	27	28.8	28.8	28.8	132.2	132.2	132.2	60.1	60.1	60.1	16.479	111	101	106	106	108.5	103.5	69	66	66	67.5	67.5	66	82	80	83	82
2073	MD	F	0	LA RACINE IWE	9	1	KAMPEMBA	2002-08-11	2300	0	0	0	0		2		0	0	2014-10-29	12	12.1	4	27	38.9	38.9	38.9	150.4	150.4	150.4	63	63	63	17.197	108	104	114	106	111	109	75	77	67	76	71	72	90	86	81	86
2074	KL	M	1	LA RACINE IWE	9	1	KAMPEMBA	2002-05-17	3500	0	0	0	0		2		1	0	2014-10-29	12	12.2	4	27	33.8	33.8	33.8	144	144	144	67	67	67	16.3002	98	103	99	100.5	98.5	101	57	61	52	59	54.5	56.5	72	79	73	66
2075	TT	F	0	LA RACINE IWE	4	1	KAMPEMBA	2007-10-03	3000	0	0	0	0		2		0	0	2014-11-04	7	7	3	32	22.4	22.4	22.4	121	121	121	61	61	61	15.2995	106	101	100	103.5	103	100.5	65	54	64	59.5	64.5	59	79	79	79	110
2077	KM	M	1	LA RACINE IWE	6	1	KAMPEMBA	2006-08-01	3700	0	0	0	0		2		0	0	2014-10-31	8	8.1	3	30	27.2	27.2	27.2	130	130	130	58	58	58	16.0947	120	94	91	107	105.5	92.5	61	63	57	62	59	60	84	72	70	106
2078	KN	F	0	LA RACINE IWE	5	1	KAMPEMBA	2007-09-08	2750	0	0	0	0		2		0	0	2014-10-31	7	7.1	3	30	22.4	22.4	22.4	124	124	124	58	58	58	14.5682	117	115	103	116	110	109	76	65	73	70.5	74.5	69	91	84	80	77
2079	NF	F	0	LA RACINE IWE	4	1	KAMPEMBA	2008-12-28	2200	0	0	0	0		2		0	0	2014-10-31	5	5.9	2	32	20.9	20.9	20.9	120.2	120.2	120.2	55	55	55	14.4656	86	87	103	86.5	94.5	95	61	54	69	57.5	65	61.5	69	66	79	79
2080	IM	F	0	LA RACINE IWE	5	1	KAMPEMBA	2007-08-11	1900	0	0	0	0		2		0	0	2014-10-31	7	7.1	3	30	20.4	20.4	20.4	112	112	112	62	62	62	16.2628	114	102	99	108	106.5	100.5	60	60	59	60	59.5	59.5	85	74	72	95
2081	KN	M	1	LA RACINE IWE	4	1	KAMPEMBA	2008-11-10	3000	0	0	0	0		2		0	0	2014-11-04	5	6	2	32	22.4	22.4	22.4	124	124	124	55	55	55	14.5682	106	102	105	104	105.5	103.5	67	72	58	69.5	62.5	65	83	84	74	107
2082	VK	M	1	LA RACINE IWE	4	1	KAMPEMBA	2009-01-03	3000	0	0	0	0		2		0	0	2014-10-31	5	5.3	2	32	17.9	17.9	17.9	114	114	114	54	54	54	13.7735	82	108	89	95	85.5	98.5	64	46	48	55	56	47	73	61	60	89
2083	NK	M	1	LA RACINE IWE	4	1	KAMPEMBA	2008-04-01	4400	0	0	0	0		2		0	0	2014-10-31	6	6.3	2	32	20.5	20.5	20.5	113.7	113.7	113.7	56	56	56	15.8574	99	96	89	97.5	94	92.5	70	67	64	68.5	67	65.5	83	78	72	94
2084	NI	M	1	LA RACINE IWE	6	1	KAMPEMBA	2005-08-01	3000	0	0	0	0		2		0	0	2014-10-31	9	9.1	3	30	34.4	34.4	34.4	143.4	143.4	143.4	65	65	65	16.7286	102	102	103	102	102.5	102.5	65	65	67	65	66	66	77	79	80	75
2085	SN	M	1	LA RACINE IWE	4	1	KAMPEMBA	2008-12-14	3050	0	0	0	0		2		0	0	2014-10-31	5	6	2	32	15.7	15.7	15.7	100	100	100	56	56	56	15.7	89	86	87	87.5	88	86.5	47	50	50	48.5	48.5	50	66	64	64	85
2086	KM	F	0	LA RACINE IWE	6	1	KAMPEMBA	2006-01-20	3000	0	0	0	0		2		0	0	2014-10-31	8	8.3	3	30	24.4	24.4	24.4	127.8	127.8	127.8	60	60	60	14.9392	94	89	88	91.5	91	88.5	58	52	48	55	53	50	76	67	63	76
2087	GM	F	0	LA RACINE IWE	4	1	KAMPEMBA	2008-09-20	#NULL!	0	0	0	0		2		0	0	2014-11-03	6	6	2	32	16.9	16.9	16.9	113.1	113.1	113.1	53.1	53.1	53.1	13.2118	100	90	93	95	96.5	91.5	57	53	63	55	60	58	74	68	72	96
2088	KK	M	1	LA RACINE IWE	4	1	KAMPEMBA	2008-09-01	3000	0	0	0	0		2		0	0	2014-10-31	6	6.1	2	32	15.8	15.8	15.8	107	107	107	53.6	53.6	53.6	13.8003	113	110	103	111.5	108	106.5	76	82	62	79	69	72	92	91	77	89
2089	KK	M	1	LA RACINE IWE	6	1	KAMPEMBA	2006-08-25	2000	0	0	0	0		2		0	0	2014-10-31	8	8.1	3	30	28.8	28.8	28.8	133	133	133	66	66	66	16.2813	100	105	112	102.5	106	108.5	66	56	57	61	61.5	56.5	84	75	82	67
2090	KM	M	1	LA RACINE IWE	4	1	KAMPEMBA	2008-12-06	2000	0	0	0	0		2		0	0	2014-10-31	5	6	2	32	21.4	21.4	21.4	123.1	123.1	123.1	58	58	58	14.122	84	89	87	86.5	85.5	88	44	53	44	48.5	44	48.5	62	65	60	58
2091	LY	F	0	LA RACINE IWE	6	1	KAMPEMBA	2003-07-27	#NULL!	0	0	0	0		2		0	0	2014-11-04	11	11.1	4	28	31	31	31	144.2	144.2	144.2	65	65	65	14.9084	119	131	129	125	124	130	89	71	74	80	81.5	72.5	99	94	93	97
2092	KZ	M	1	LA RACINE IWE	5	1	KAMPEMBA	2007-12-06	#NULL!	0	0	0	0		2		0	0	2014-11-04	6	7	3	28	23.8	23.8	23.8	139.2	139.2	139.2	61	61	61	12.2828	126	132	134	129	130	133	71	72	79	71.5	75	75.5	96	101	98	127
2093	KZ	F	0	LA RACINE IWE	6	1	KAMPEMBA	2004-01-02	#NULL!	0	0	0	0		2		0	0	2014-11-04	10	10.3	3	28	30.2	30.2	30.2	144.6	144.6	144.6	63	63	63	14.4434	149	147	140	148	144.5	143.5	78	83	88	80.5	83	85.5	106	108	106	129
2094	MK	F	0	LA RACINE IWE	7	1	KAMPEMBA	2006-04-16	3500	0	0	0	0		2		0	0	2014-10-30	8	8.2	3	30	21	21	21	116.2	116.2	116.2	57	57	57	15.5527	95	92	94	93.5	94.5	93	51	52	49	51.5	50	50.5	68	68	67	80
2095	MI	F	0	LA RACINE IWE	7	1	KAMPEMBA	2005-03-19	2750	0	0	0	0		2		0	0	2014-10-30	9	9.2	3	30	28.9	28.9	28.9	130	130	130	59	59	59	17.1006	107	110	99	108.5	103	104.5	62	67	54	64.5	58	60.5	77	83	71	83
2096	HB	M	1	LA RACINE IWE	9	1	KAMPEMBA	2005-04-17	4500	0	0	0	0		2		0	0	2014-10-29	9	9.2	3	27	36.9	36.9	36.9	142.8	142.8	142.8	63	63	63	18.0955	85	85	91	85	88	88	61	59	53	60	57	56	71	69	67	77
2097	KA	F	0	LA RACINE IWE	9	1	KAMPEMBA	2004-05-24	3200	0	0	0	0		2		0	0	2014-10-29	10	10.2	3	27	33.2	33.2	33.2	134	134	134	61	61	61	18.4896	120	118	104	119	112	111	73	62	60	67.5	66.5	61	90	86	78	102
2098	NR	F	0	LA RACINE IWE	9	1	KAMPEMBA	2002-09-10	3420	0	0	0	0		2		0	0	2014-10-29	12	12.1	4	27	40.4	40.4	40.4	158.6	158.6	158.6	64	64	64	16.0611	100	105	98	102.5	99	101.5	65	58	53	61.5	59	55.5	76	76	73	61
2099	BM	M	1	LA RACINE IWE	9	1	KAMPEMBA	2002-09-01	3350	0	0	0	0		2		0	1	2014-10-29	12	12.1	4	27	54.6	54.6	54.6	159.7	159.7	159.7	71	71	71	21.4083	143	135	127	139	135	131	65	60	61	62.5	63	60.5	97	97	97	100
2100	MS	F	0	LA RACINE IWE	4	1	KAMPEMBA	2007-11-04	#NULL!	0	0	0	0		2		0	0	2014-11-04	7	7	3	32	15.7	15.7	15.7	100.8	100.8	100.8	53	53	53	15.4518	99	104	104	101.5	101.5	104	75	60	64	67.5	69.5	62	84	75	80	95
2101	KA	M	1	LA RACINE IWE	8	1	KAMPEMBA	2005-02-11	1500	0	0	0	0		2		0	1	2014-10-29	9	9.3	3	30	27.4	27.4	27.4	131.7	131.7	131.7	60.4	60.4	60.4	15.7972	102	93	102	97.5	102	97.5	69	61	58	65	63.5	59.5	85	77	75	71
2102	NK	F	0	LA RACINE IWE	8	1	KAMPEMBA	2002-03-01	3500	0	0	0	0		2		0	0	2014-10-29	12	12.3	4	30	43.2	43.3	43.25	147.2	147.2	147.2	65	65	65	19.9605	125	116	110	120.5	117.5	113	67	67	64	67	65.5	65.5	93	90	84	123
2103	TL	M	1	LA RACINE IWE	8	1	KAMPEMBA	2004-04-29	4000	0	0	0	0		2		0	0	2014-10-29	10	10.2	3	30	33.1	33.1	33.1	134.1	134.1	134.1	62	62	62	18.4065	113	107	109	110	111	108	74	68	54	71	64	61	93	76	79	95
2104	KM	M	1	NURU BONGONGA	7	1	KAMPEMBA	2006-03-15	3000	0	0	0	0		2		0	1	2014-10-28	8	8.2	3	27	24.2	24.2	24.2	123	123	123	56	56.5	56.25	15.9958	117	119	112	118	114.5	115.5	76	75	71	75.5	73.5	73	94	94	89	97
2105	MT	M	1	NURU BONGONGA	7	1	KAMPEMBA	2001-06-30	3450	0	0	0	0		2		0	1	2014-10-28	13	13.1	4	27	29.1	29.1	29.1	135	134	134.5	57	57	57	16.086	100	101	98	100.5	99	99.5	68	68	70	68	69	69	86	76	82	89
2106	AK	F	0	NURU BONGONGA	7	1	KAMPEMBA	2006-09-21	3400	0	0	0	0		2		1	0	2014-10-28	8	8	3	27	24.7	24.7	24.7	125	129.6	127.3	56	56.2	56.1	15.2419	105	106	102	105.5	103.5	104	67	61	65	64	66	63	84	78	79	89
2107	FB	F	0	NURU BONGONGA	7	1	KAMPEMBA	2004-09-10	2800	0	0	0	0		2		0	0	2014-10-28	10	10.1	3	27	23.8	23.8	23.8	126.1	125	125.55	54	54.1	54.05	15.0988	110	114	111	112	110.5	112.5	57	58	58	57.5	57.5	58	81	73	79	84
3700	NF	F	0	KAMALONDO 3	9	1	KAMALONDO	2001-04-26	3500	0	0	0	0		2		0	0	2014-12-11	13	13.2	4	30	43.3	43.3	43.3	150.2	150.2	150.2	65.1	65.1	65.1	19.1932	120	121	120	120.5	120	120.5	71	68	66	69.5	68.5	67	95	88	86	106
3701	BW	M	1	KAMALONDO 3	9	1	KAMALONDO	2000-04-20	#NULL!	0	0	0	0		2		0	0	2014-12-11	14	14.2	5	30	49.1	49.2	49.15	161.7	161.7	161.7	70.3	70.3	70.3	18.7976	115	133	129	124	122	131	80	83	80	81.5	80	81.5	96	101	101	62
3702	KN	M	1	KAMALONDO 3	9	1	ANNEXE	2003-03-10	3000	0	0	0	0		2		1	1	2014-12-11	11	11.3	4	30	34.1	33.9	34	143	143	143	62.4	62.4	62.4	16.6267	127	120	116	123.5	121.5	118	80	68	70	74	75	69	100	91	90	66
3703	SK	M	1	KAMALONDO 3	9	1	KAMPEMBA	2004-09-24	3700	0	0	0	0		2		0	0	2014-12-11	10	10.1	3	30	26.3	26.3	26.3	131.5	131.5	131.5	61.7	61.7	61.7	15.2091	109	105	108	107	108.5	106.5	58	65	61	61.5	59.5	63	85	80	71	79
3704	BL	M	1	KAMALONDO 3	9	1	KAMALONDO	2004-01-21	3800	0	0	0	0		2		0	0	2014-12-11	10	10.3	3	30	25.6	25.1	25.35	133.9	133.9	133.9	55.1	55.2	55.15	14.1389	98	101	99	99.5	98.5	100	61	57	62	59	61.5	59.5	75	83	76	54
3705	NM	F	0	KAMALONDO 3	9	1	KAMALONDO	2001-05-25	3200	0	0	0	0		2		0	0	2014-12-11	13	13.2	4	30	49.6	49.5	49.55	154.8	154.1	154.45	71.4	71.4	71.4	20.7715	128	126	126	127	127	126	75	80	80	77.5	77.5	80	91	95	95	80
3706	MY	M	1	KAMALONDO 3	9	1	KAMALONDO	2003-01-31	2500	0	0	0	0		2		0	0	2014-12-11	11	11.3	4	30	36.3	36.5	36.4	143.9	143.8	143.85	66.5	66.5	66.5	17.5906	109	119	111	114	110	115	58	68	58	63	58	63	81	88	78	62
3707	KN	F	0	KAMALONDO 3	9	1	KAMALONDO	2001-06-29	3200	0	0	0	0		2		0	0	2014-12-11	13	13.1	4	30	49.8	49.8	49.8	160.2	160.1	160.15	70.8	70.6	70.7	19.4167	126	127	128	126.5	127	127.5	69	61	71	65	70	66	90	85	90	79
3708	KM	F	0	KAMALONDO 3	9	1	KAMALONDO	2002-03-03	2000	0	0	0	0		2		0	0	2014-12-11	12	12.3	4	30	37.6	37.6	37.6	150	150.1	150.05	64.2	64.2	64.2	16.7	123	129	124	126	123.5	126.5	68	72	70	70	69	71	96	96	89	81
3709	KO	F	0	KAMALONDO 3	9	1	KAMALONDO	2000-05-24	2800	0	0	0	0		2		0	0	2014-12-11	14	14.2	5	30	45.5	45.6	45.55	161.2	161.2	161.2	66.2	66.1	66.15	17.529	110	108	116	109	113	112	69	62	63	65.5	66	62.5	83	85	86	69
3710	KY	F	0	KAMALONDO 3	9	1	KAMALONDO	2000-12-27	3800	0	0	0	0		2		0	0	2014-12-11	13	14	5	30	44.7	44.7	44.7	161.8	161.8	161.8	64.1	64.1	64.1	17.0746	111	108	101	109.5	106	104.5	68	67	59	67.5	63.5	63	88	86	80	64
2108	TB	M	1	NURU BONGONGA	7	1	KAMPEMBA	2005-05-19	3375	0	0	0	0		2		0	0	2014-10-28	9	9.2	3	29	25.5	25.5	25.5	131.8	131.8	131.8	57.3	57.3	57.3	14.6794	106	106	105	106	105.5	105.5	75	60	64	67.5	69.5	62	88	79	82	76
2109	NM	M	1	NURU BONGONGA	7	1	KAMPEMBA	2006-06-15	3100	0	0	0	0		2		0	0	2014-10-28	8	8.2	3	28	25.1	25	25.05	127.6	127.6	127.6	56	56	56	15.3853	98	103	98	100.5	98	100.5	64	55	50	59.5	57	52.5	77	72	71	84
2110	FN	F	0	NURU BONGONGA	7	1	KAMPEMBA	2004-11-24	3800	0	0	0	0		2		0	0	2014-10-28	9	10	3	28	28.6	28.6	28.6	134.8	134.8	134.8	59.6	59.5	59.55	15.7393	123	114	104	118.5	113.5	109	69	70	75	69.5	72	72.5	97	88	82	80
2111	TM	M	1	NURU BONGONGA	7	1	KAMPEMBA	2004-05-14	3200	0	0	0	0		2		0	0	2014-10-28	10	10.2	3	27	29.7	30.2	29.95	136.2	136.2	136.2	60	60	60	16.1452	97	104	96	100.5	96.5	100	58	52	45	55	51.5	48.5	71	74	64	78
2112	KT	F	0	NURU BONGONGA	7	1	KAMPEMBA	2005-04-23	3200	0	0	0	0		2		1	0	2014-10-28	9	9.2	3	27	29.5	20.5	25	138	138	138	58.3	58.2	58.25	13.1275	101	105	102	103	101.5	103.5	62	78	76	70	69	77	78	85	86	65
2113	NK	F	0	NURU BONGONGA	7	1	KAMPEMBA	2005-10-29	#NULL!	0	0	0	0		2		1	1	2014-10-28	8	9	3	28	27.7	27.7	27.7	133	133	133	55.9	55.9	55.9	15.6594	96	98	96	97	96	97	54	53	61	53.5	57.5	57	72	69	79	67
2114	MK	M	1	NURU BONGONGA	7	1	KAMPEMBA	2005-06-06	1650	0	0	0	0		2		0	0	2014-10-28	9	9.2	3	28	28.2	28.2	28.2	125	125	125	62	62	62	18.048	104	105	111	104.5	107.5	108	69	71	69	70	69	70	85	83	83	65
2115	MM	F	0	NURU BONGONGA	7	1	KAMPEMBA	2003-02-14	2500	0	0	0	0		2		0	0	2014-10-28	11	11.3	4	29	30.8	30.8	30.8	147	147	147	61	61	61	14.2533	118	115	124	116.5	121	119.5	63	74	65	68.5	64	69.5	89	89	95	111
2116	MK	M	1	NURU BONGONGA	7	1	KAMPEMBA	2004-10-09	3700	0	0	0	0		2		0	0	2014-10-28	10	10.1	3	30	17.5	17.5	17.5	129.5	129.5	129.5	56.8	56.8	56.8	10.4351	98	99	97	98.5	97.5	98	60	64	54	62	57	59	75	74	72	75
2117	EK	M	1	NURU BONGONGA	7	1	KAMPEMBA	2004-08-08	2007	0	0	0	0		2		0	0	2014-10-28	10	10.1	3	30	24.3	24.3	24.3	120	120	120	55.9	55.9	55.9	16.875	99	90	110	94.5	104.5	100	65	60	58	62.5	61.5	59	80	73	72	73
2118	LM	M	1	NURU BONGONGA	7	1	KAMPEMBA	2005-10-24	3600	0	0	0	0		2		0	0	2014-10-28	9	9	3	30	26.5	26.5	26.5	123.3	123.3	123.3	56	56	56	17.4309	105	105	108	105	106.5	106.5	67	59	66	63	66.5	62.5	85	79	84	66
2119	MG	F	0	NURU BONGONGA	7	1	KAMPEMBA	2001-10-25	2800	0	0	0	0		2		1	0	2014-10-28	13	13	4	30	42.9	42.9	42.9	155.5	155.5	155.5	67	67	67	17.7418	123	121	124	122	123.5	122.5	75	80	68	77.5	71.5	74	100	89	90	61
2120	DD	M	1	NURU BONGONGA	7	1	KAMPEMBA	2004-07-07	2800	0	0	0	0		2		0	0	2014-10-28	10	10.1	3	30	28.2	28	28.1	132	132	132	56.7	56.7	56.7	16.1272	113	108	119	110.5	116	113.5	73	74	66	73.5	69.5	70	89	87	85	96
2121	CM	F	0	NURU BONGONGA	7	1	KAMPEMBA	2004-12-26	3500	0	0	0	0		2		0	0	2014-10-28	9	9.9	3	30	29.08	29.08	29.08	136	136	136	63.5	63.5	63.5	15.7223	104	102	95	103	99.5	98.5	50	58	54	54	52	56	76	73	73	83
2122	AO	F	0	NURU BONGONGA	7	1	KAMPEMBA	2005-10-05	3350	0	0	0	0		2		0	0	2014-10-28	9	9.1	3	31	23.2	23.2	23.2	124.1	124.1	124.1	57	57	57	15.0641	115	103	104	109	109.5	103.5	60	61	65	60.5	62.5	63	87	78	77	65
2123	TB	M	1	NURU BONGONGA	7	1	KAMPEMBA	2005-06-25	2005	0	0	0	0		2		0	0	2014-10-28	9	9.1	3	31	23.9	23.9	23.9	124	124	124	56.8	56.8	56.8	15.5437	113	115	111	114	112	113	69	66	59	67.5	64	62.5	86	85	85	99
2124	LL	M	1	NURU BONGONGA	7	1	KAMPEMBA	2004-08-06	3500	0	0	0	0		2		1	0	2014-10-28	10	10.1	3	31	23.3	23.3	23.3	124	124	124	55.6	55.6	55.6	15.1535	90	95	91	92.5	90.5	93	50	54	52	52	51	53	68	67	67	99
2125	MN	M	1	NURU BONGONGA	7	1	KAMPEMBA	2005-07-12	3800	0	0	0	0		2		0	0	2014-10-28	9	9.1	3	31	24.4	24.4	24.4	120.5	120.2	120.35	60.5	61	60.75	16.846	96	96	96	96	96	96	54	58	53	56	53.5	55.5	71	72	71	77
2126	BZ	F	0	NURU BONGONGA	7	1	KAMPEMBA	2005-08-30	3500	0	0	0	0		2		0	0	2014-10-28	9	9.1	3	31	28.01	28.01	28.01	138	138	138	55	55	55	14.708	113	107	107	110	110	107	56	56	52	56	54	54	81	76	74	78
2127	MB	M	1	NURU BONGONGA	7	1	KAMPEMBA	2006-01-09	3200	0	0	0	0		2		0	0	2014-10-28	8	8.3	3	31	25	25	25	128.8	129	128.9	54.5	55	54.75	15.0465	97	98	94	97.5	95.5	96	60	52	53	56	56.5	52.5	75	73	69	81
2128	SK	M	1	NURU BONGONGA	7	1	KAMPEMBA	2005-08-08	3500	0	0	0	0		2		0	1	2014-10-28	9	9.1	3	31	29.1	29.1	29.1	131.1	131.1	131.1	60.8	61.8	61.3	16.9312	104	105	100	104.5	102	102.5	64	59	53	61.5	58.5	56	82	75	74	90
2129	MN	F	0	NURU BONGONGA	7	1	KAMPEMBA	2004-09-29	2004	0	0	0	0		2		0	0	2014-10-28	10	10	3	24	27	26.9	26.95	131.5	131.4	131.45	58.5	58.6	58.55	15.5969	139	132	120	135.5	129.5	126	78	78	73	78	75.5	75.5	102	96	93	101
2130	OO	M	1	NURU BONGONGA	7	1	KAMPEMBA	2006-01-13	3800	0	0	0	0		2		0	0	2014-10-28	8	8.3	3	25	26.2	26.2	26.2	126.8	126.9	126.85	55	55	55	16.2825	110	115	119	112.5	114.5	117	71	67	63	69	67	65	87	87	77	83
2131	AT	F	0	NURU BONGONGA	7	1	KAMPEMBA	2006-05-14	3000	0	0	0	0		2		0	1	2014-10-28	8	8.2	3	25	28.1	27.9	28	131	131	131	58	58.1	58.05	16.3161	107	113	112	110	109.5	112.5	73	73	69	73	71	71	88	87	85	89
2132	TT	F	0	NURU BONGONGA	7	1	KAMPEMBA	2004-10-10	3300	0	0	0	0		2		0	0	2014-10-28	10	10	3	25	27.7	27.7	27.7	130	130	130	60.5	60.5	60.5	16.3905	129	127	122	128	125.5	124.5	67	76	77	71.5	72	76.5	93	96	94	108
2133	MN	F	0	NURU BONGONGA	7	1	KAMPEMBA	2005-08-15	#NULL!	0	0	0	0		2		0	0	2014-10-28	9	9.1	3	25	29	29	29	126	126.1	126.05	60	60.1	60.05	18.2521	112	129	117	120.5	114.5	123	69	80	74	74.5	71.5	77	98	95	88	71
2134	MB	F	0	NURU BONGONGA	7	1	KAMPEMBA	2003-08-07	#NULL!	0	0	0	0		2		0	0	2014-10-28	11	11.1	4	26	27.7	27.7	27.7	128.2	128.1	128.15	58.4	58.5	58.45	16.8672	107	90	111	98.5	109	100.5	63	59	81	61	72	70	79	73	89	104
2135	KM	F	0	NURU BONGONGA	7	1	KAMPEMBA	2004-11-15	#NULL!	0	0	0	0		2		0	0	2014-10-28	9	10	3	26	24.1	24.1	24.1	132.5	132.6	132.55	54	54.1	54.05	13.717	137	112	115	124.5	126	113.5	84	77	72	80.5	78	74.5	93	91	86	101
2136	AS	M	1	NURU BONGONGA	7	1	KAMPEMBA	2003-06-30	#NULL!	0	0	0	0		2		0	0	2014-10-28	11	11.1	4	26	27.5	27.5	27.5	129.5	129.5	129.5	59	59	59	16.3981	100	87	90	93.5	95	88.5	53	63	57	58	55	60	69	73	71	69
2137	MM	F	0	NURU BONGONGA	7	1	KAMPEMBA	2004-10-08	3000	0	0	0	0		2		0	0	2014-10-28	10	10.1	3	25	25	25.1	25.05	120.6	120.6	120.6	58	58.1	58.05	17.2232	110	125	124	117.5	117	124.5	77	61	77	69	77	69	94	91	96	83
2138	KK	M	1	NURU BONGONGA	7	1	KAMPEMBA	2004-02-12	2012	0	0	0	0		2		0	0	2014-10-28	10	10.3	3	26	26.3	26.4	26.35	125.6	125.5	125.55	56.5	56.5	56.5	16.7166	105	99	104	102	104.5	101.5	43	70	61	56.5	52	65.5	62	84	75	79
2139	MA	M	1	NURU BONGONGA	7	1	KAMPEMBA	2004-08-21	4800	0	0	0	0		2		1	1	2014-10-28	10	10.1	3	26	30.9	31	30.95	140.3	140.4	140.35	59.6	59.6	59.6	15.7122	116	115	80	115.5	98	97.5	64	69	52	66.5	58	60.5	76	94	65	98
2140	UM	M	1	NURU BONGONGA	6	1	KAMPEMBA	2007-10-09	2900	0	0	0	0		2		0	0	2014-10-29	7	7.1	3	26	19.2	19.3	19.25	114.5	114.4	114.45	51.5	51.5	51.5	14.696	103	104	98	103.5	100.5	101	71	66	63	68.5	67	64.5	81	82	81	83
2141	KM	F	0	NURU BONGONGA	6	1	KAMPEMBA	2006-07-01	2800	0	0	0	0		2		0	1	2014-10-29	14	8.2	3	25	24	24.1	24.05	129.3	129.3	129.3	54	54.1	54.05	14.3853	111	101	110	106	110.5	105.5	69	78	64	73.5	66.5	71	88	87	86	94
2142	LM	F	0	NURU BONGONGA	6	1	KAMPEMBA	2005-10-28	4000	0	0	0	0		2		0	0	2014-10-29	9	9	3	27	25.6	25.6	25.6	120	120.1	120.05	55.4	55.5	55.45	17.763	104	105	109	104.5	106.5	107	79	58	65	68.5	72	61.5	89	81	79	85
2143	MB	F	0	NURU BONGONGA	6	1	KAMPEMBA	2007-05-12	3180	0	0	0	0		2		0	0	2014-10-29	7	7.2	3	27	25.3	25.4	25.35	125.3	125.2	125.25	58	58	58	16.1593	137	139	132	138	134.5	135.5	83	74	85	78.5	84	79.5	101	104	102	88
2144	SA	F	0	NURU BONGONGA	6	1	KAMPEMBA	2006-04-04	#NULL!	0	0	0	0		2		0	0	2014-10-29	8	8.2	3	27	30.4	30.4	30.4	124.9	124.9	124.9	65	65	65	19.4872	104	106	105	105	104.5	105.5	61	79	70	70	65.5	74.5	80	87	81	98
2145	MY	M	1	NURU BONGONGA	6	1	KAMPEMBA	2006-02-07	3000	0	0	0	0		2		0	0	2014-10-29	8	8.3	3	27	26.9	26.8	26.85	123	123.1	123.05	57.4	57.4	57.4	17.733	109	105	102	107	105.5	103.5	68	53	56	60.5	62	54.5	84	77	78	69
2146	MK	F	0	NURU BONGONGA	6	1	KAMPEMBA	2006-06-14	3800	0	0	0	0		2		1	1	2014-10-29	8	8.2	3	27	26.6	26.6	26.6	123	123	123	58.3	58.3	58.3	17.5821	97	101	107	99	102	104	70	80	61	75	65.5	70.5	82	86	78	76
2147	MK	F	0	NURU BONGONGA	6	1	KAMPEMBA	2005-05-17	3500	0	0	0	0		2		0	0	2014-10-29	9	9.2	3	27	25.8	26	25.9	126	126.1	126.05	56	56	56	16.301	111	104	101	107.5	106	102.5	73	65	58	69	65.5	61.5	83	77	73	86
2148	HN	M	1	NURU BONGONGA	6	1	KAMPEMBA	2004-06-10	2800	0	0	0	0		2		0	0	2014-10-26	10	10.2	3	27	25.9	26	25.95	119	119	119	59	59	59	18.325	96	128	102	112	99	115	58	46	62	52	60	54	76	82	76	82
2149	AK	F	0	NURU BONGONGA	6	1	KAMPEMBA	2006-06-20	3500	0	0	0	0		2		0	0	2014-10-29	8	8.1	3	26	20.9	21	20.95	118.3	118.3	118.3	49	49	49	14.9697	93	97	93	95	93	95	52	66	57	59	54.5	61.5	72	76	74	80
2150	PM	M	1	NURU BONGONGA	6	1	KAMPEMBA	2006-08-18	3250	0	0	0	0		2		0	0	2014-10-29	8	8.1	3	27	18.9	19	18.95	119.8	119.8	119.8	51	51	51	13.2037	95	98	93	96.5	94	95.5	64	65	51	64.5	57.5	58	74	75	71	75
2151	PM	M	1	NURU BONGONGA	6	1	KAMPEMBA	2005-06-10	#NULL!	0	0	0	0		2		0	0	2014-10-29	9	9.2	3	27	20.3	20.3	20.3	115.3	115.4	115.35	48	48.1	48.05	15.2567	104	106	103	105	103.5	104.5	73	62	63	67.5	68	62.5	83	78	85	86
2152	BM	M	1	NURU BONGONGA	6	1	KAMPEMBA	2006-02-25	#NULL!	0	0	0	0		2		0	0	2014-10-29	8	8.3	3	27	28	28	28	128	128	128	59.5	59.5	59.5	17.0898	104	102	105	103	104.5	103.5	78	45	56	61.5	67	50.5	84	79	73	69
2153	MJ	M	1	NURU BONGONGA	6	1	KAMPEMBA	2004-12-16	4200	0	0	0	0		2		0	0	2014-10-29	10	10	3	26	23.5	23.7	23.6	121.7	121.6	121.65	57	57	57	15.9473	97	98	97	97.5	97	97.5	56	61	58	58.5	57	59.5	75	74	76	67
2154	SM	F	0	NURU BONGONGA	6	1	KAMPEMBA	2005-08-01	2500	0	0	0	0		2		0	0	2014-10-29	9	9.1	3	26	28.5	28.6	28.55	124.1	124.1	124.1	64	64	64	18.538	102	106	95	104	98.5	100.5	65	54	52	59.5	58.5	53	80	78	73	110
2155	TB	M	1	NURU BONGONGA	6	1	KAMPEMBA	2007-06-13	2700	0	0	0	0		2		0	0	2014-10-29	7	7.2	3	27	26.7	26.7	26.7	125.1	125.1	125.1	57	57	57	17.0607	103	111	106	107	104.5	108.5	75	68	66	71.5	70.5	67	89	80	76	74
2156	IK	M	1	NURU BONGONGA	6	1	KAMPEMBA	2004-05-25	3500	0	0	0	0		2		0	0	2014-10-29	10	10.2	3	27	27.3	27.3	27.3	133.1	133.1	133.1	55.2	55.3	55.25	15.4101	101	99	98	100	99.5	98.5	56	59	55	57.5	55.5	57	71	76	78	68
2157	RN	F	0	NURU BONGONGA	6	1	KAMPEMBA	2007-09-03	3400	0	0	0	0		2		0	0	2014-10-29	7	7.1	3	27	21.8	21.8	21.8	118.7	118.8	118.75	56	56.2	56.1	15.4593	102	100	99	101	100.5	99.5	57	59	59	58	58	59	77	76	77	92
2158	MP	F	0	NURU BONGONGA	6	1	KAMPEMBA	2004-09-21	#NULL!	0	0	0	0		2		0	0	2014-10-29	10	10.1	3	27	30.2	30.4	30.3	135.7	135.6	135.65	60.5	60.5	60.5	16.4666	129	119	123	124	126	121	80	75	78	77.5	79	76.5	99	94	95	106
2159	MK	M	1	NURU BONGONGA	6	1	KAMPEMBA	2005-04-20	3760	0	0	0	0		2		0	0	2014-10-29	9	9.2	3	27	24.9	24.9	24.9	131.3	131.3	131.3	52.2	52.3	52.25	14.4434	129	116	124	122.5	126.5	120	74	75	63	74.5	68.5	69	93	89	88	132
2160	KM	F	0	NURU BONGONGA	6	1	KAMPEMBA	2007-06-20	3700	0	0	0	0		2		1	0	2014-10-30	7	7.1	3	25	19	19.2	19.1	111.9	112	111.95	52	52	52	15.24	109	107	104	108	106.5	105.5	82	72	75	77	78.5	73.5	95	88	86	95
2161	NK	F	0	NURU BONGONGA	6	1	KAMPEMBA	2007-11-27	3300	0	0	0	0		2		0	1	2014-10-30	6	7	3	25	24.5	24.4	24.45	126.3	126.3	126.3	57.4	57.4	57.4	15.3275	109	102	99	105.5	104	100.5	67	65	64	66	65.5	64.5	85	83	78	87
2162	YK	F	0	NURU BONGONGA	6	1	KAMPEMBA	2007-09-05	2500	0	0	0	0		2		0	0	2014-10-30	7	7.1	3	26	25.6	25.5	25.55	120.7	120.7	120.7	60.9	60.9	60.9	17.5379	101	102	100	101.5	100.5	101	54	60	69	57	61.5	64.5	73	77	81	86
2163	II	M	1	NURU BONGONGA	6	1	KAMPEMBA	2004-09-09	#NULL!	0	0	0	0		2		0	0	2014-10-30	10	10.1	3	25	29.2	29.1	29.15	128.1	128.1	128.1	58.3	58.3	58.3	17.764	109	107	102	108	105.5	104.5	61	74	60	67.5	60.5	67	78	84	81	98
2164	LK	F	0	NURU BONGONGA	6	1	KAMPEMBA	2007-04-29	3750	0	0	0	0		2		0	0	2014-10-30	8	7.2	3	26	25.1	25.1	25.1	131	131	131	53.2	53.1	53.15	14.6262	108	108	114	108	111	111	78	71	68	74.5	73	69.5	91	90	85	99
2165	RM	F	0	NURU BONGONGA	6	1	KAMPEMBA	2006-12-07	4500	0	0	0	0		2		0	0	2014-10-30	7	8	3	26	32.9	33	32.95	135.9	135.8	135.85	63.5	63.5	63.5	17.854	111	109	102	110	106.5	105.5	67	68	65	67.5	66	66.5	82	79	79	75
2166	KK	F	0	NURU BONGONGA	6	1	KAMPEMBA	2006-07-17	#NULL!	0	0	0	0		2		0	0	2014-10-30	8	8.1	3	25	21.3	21.3	21.3	116.7	116.6	116.65	55.3	55.3	55.3	15.6535	110	107	102	108.5	106	104.5	71	84	76	77.5	73.5	80	83	91	84	119
2167	ME	M	1	NURU BONGONGA	6	1	KAMPEMBA	2005-09-10	#NULL!	0	0	0	0		2		1	1	2014-10-30	9	9.1	3	27	31.3	31.3	31.3	133.8	133.7	133.75	58	58	58	17.4967	99	108	97	103.5	98	102.5	67	65	60	66	63.5	62.5	79	82	76	84
2168	LM	M	1	NURU BONGONGA	6	1	KAMPEMBA	2007-08-08	#NULL!	0	0	0	0		2		0	0	2014-10-30	7	7.1	3	25	33.5	33.5	33.5	137.1	137.2	137.15	63	63.1	63.05	17.8096	116	117	119	116.5	117.5	118	84	60	60	72	72	60	88	80	80	84
2169	EM	M	1	NURU BONGONGA	5	1	KAMPEMBA	2008-02-13	3200	0	0	0	0		2		0	0	2014-10-30	6	6.3	2	30	20.4	20.4	20.4	111.2	112.2	111.7	54.2	54.2	54.2	16.3502	105	105	107	105	106	106	60	64	59	62	59.5	61.5	81	78	93	111
2170	MK	F	0	NURU BONGONGA	5	1	KAMPEMBA	2008-10-01	3700	0	0	0	0		2		1	1	2014-10-30	6	6.1	2	30	21.2	21.2	21.2	116.2	116.2	116.2	54.2	54.2	54.2	15.7009	94	97	103	95.5	98.5	100	55	51	53	53	54	52	70	71	69	95
2171	MM	F	0	NURU BONGONGA	5	1	KAMPEMBA	2007-04-22	2700	0	0	0	0		2		0	0	2014-10-30	7	7.2	3	29	18.2	18.2	18.2	106.2	106.3	106.25	51	51	51	16.1218	94	97	87	95.5	90.5	92	61	54	62	57.5	61.5	58	71	77	70	75
2172	KD	F	0	NURU BONGONGA	5	1	KAMPEMBA	2006-04-05	3200	0	0	0	0		2		0	1	2014-10-31	8	8.3	3	29	19.9	20	19.95	114.5	114.5	114.5	53.2	53.2	53.2	15.2171	96	94	100	95	98	97	57	64	57	60.5	57	60.5	75	75	72	90
2173	JK	M	1	NURU BONGONGA	5	1	KAMPEMBA	2006-08-04	3300	0	0	0	0		2		0	0	2014-10-30	8	8.1	3	29	25.3	25.3	25.3	123	123.1	123.05	53.5	53.5	53.5	16.7093	101	100	100	100.5	100.5	100	59	60	65	59.5	62	62.5	79	75	76	77
2174	NM	M	1	NURU BONGONGA	5	1	KAMPEMBA	2007-09-01	2900	0	0	0	0		2		0	0	2014-10-30	7	7.1	3	29	19.5	19.6	19.55	112.7	112.7	112.7	49.9	50	49.95	15.3921	98	92	100	95	99	96	65	65	65	65	65	65	82	83	77	93
2175	KK	F	0	NURU BONGONGA	5	1	KAMPEMBA	2008-02-16	2800	0	0	0	0		2		0	0	2014-10-30	6	6.3	2	29	18.4	18.4	18.4	109.3	109.3	109.3	51.2	51.2	51.2	15.402	102	93	100	97.5	101	96.5	67	63	66	65	66.5	64.5	80	74	79	103
2176	KM	M	1	NURU BONGONGA	5	1	KAMPEMBA	2004-03-24	3200	0	0	0	0		2		0	0	2014-10-30	10	10.2	3	29	24.6	24.6	24.6	112.7	112.7	112.7	53.2	53.2	53.2	19.3681	108	120	109	114	108.5	114.5	72	57	61	64.5	66.5	59	88	85	90	97
2177	KK	M	1	NURU BONGONGA	5	1	KAMPEMBA	2007-08-14	3500	0	0	0	0		2		0	0	2014-10-30	7	7.1	3	29	18.5	18.5	18.5	111.3	111.3	111.3	52	52	52	14.9342	124	115	120	119.5	122	117.5	70	70	79	70	74.5	74.5	93	88	92	139
2178	TM	F	0	NURU BONGONGA	5	1	KAMPEMBA	2007-11-09	3200	0	0	0	0		2		0	1	2014-10-30	6	7	3	29	21.8	21.8	21.8	110.1	110.1	110.1	57.1	57.1	57.1	17.9838	98	105	101	101.5	99.5	103	63	72	68	67.5	65.5	70	80	85	82	78
2179	TC	M	1	NURU BONGONGA	5	1	KAMPEMBA	2008-08-30	3000	0	0	0	0		2		0	0	2014-10-30	6	6.1	2	29	20.7	20.8	20.75	116.2	116.2	116.2	52.2	52.1	52.15	15.3676	112	108	95	110	103.5	101.5	77	76	77	76.5	77	76.5	89	85	83	99
2180	KJ	M	1	NURU BONGONGA	5	1	KAMPEMBA	2008-09-28	3500	0	0	0	0		2		0	0	2014-10-30	6	6	2	28	16.3	16.3	16.3	104	104.1	104.05	49.5	49.5	49.5	15.0558	100	102	96	101	98	99	66	64	61	65	63.5	62.5	82	77	75	103
2181	LD	F	0	NURU BONGONGA	5	1	KAMPEMBA	2008-12-14	#NULL!	0	0	0	0		2		0	0	2014-10-30	5	6	2	28	21.1	21.1	21.1	114	114	114	54	54	54	16.2358	91	92	91	91.5	91	91.5	50	55	55	52.5	52.5	55	72	73	67	82
2182	KJ	M	1	NURU BONGONGA	5	1	KAMPEMBA	2008-08-07	2850	0	0	0	0		2		0	0	2014-10-30	6	6.1	2	28	19.5	19.5	19.5	113.2	113.1	113.15	52	52	52	15.2309	89	82	97	85.5	93	89.5	61	50	53	55.5	57	51.5	70	64	74	94
2183	NL	F	0	NURU BONGONGA	5	1	KAMPEMBA	2008-08-12	3900	0	0	0	0		2		0	0	2014-10-30	6	6.1	2	28	24.5	24.5	24.5	117	117	117	57.2	57.3	57.25	17.8976	100	99	103	99.5	101.5	101	72	80	67	76	69.5	73.5	82	82	78	79
2184	DL	M	1	NURU BONGONGA	5	1	KAMPEMBA	2009-04-24	3700	0	0	0	0		2		0	0	2014-10-30	5	5.2	2	28	25.6	25.6	25.6	119.8	119.7	119.75	55.2	55.2	55.2	17.8521	105	99	96	102	100.5	97.5	60	49	54	54.5	57	51.5	78	76	66	73
2185	AB	M	1	NURU BONGONGA	5	1	KAMPEMBA	2006-10-28	#NULL!	0	0	0	0		2		0	1	2014-10-30	8	8	3	28	23.6	23.6	23.6	119.7	119.8	119.75	55	55	55	16.4574	107	100	102	103.5	104.5	101	62	74	74	68	68	74	85	81	83	90
2186	KK	M	1	NURU BONGONGA	5	1	KAMPEMBA	2006-10-24	3500	0	0	0	0		2		0	0	2014-10-30	8	8	3	28	20.4	20.4	20.4	113	113	113	56.1	56.1	56.1	15.9762	87	95	95	91	91	95	55	59	53	57	54	56	73	68	72	85
2187	AB	M	1	NURU BONGONGA	5	1	KAMPEMBA	2007-08-11	4000	0	0	0	0		2		0	0	2014-10-30	7	7.1	3	27	22.7	22.7	22.7	123	123	123	52	52	52	15.0043	110	112	103	111	106.5	107.5	58	65	49	61.5	53.5	57	80	79	64	97
2188	AM	F	0	NURU BONGONGA	5	1	KAMPEMBA	2007-06-05	3200	0	0	0	0		2		0	0	2014-10-30	7	7.2	3	27	24.8	25	24.9	121.5	121.5	121.5	57	57	57	16.8673	112	81	89	96.5	100.5	85	73	56	40	64.5	56.5	48	82	66	67	99
2189	AM	F	0	NURU BONGONGA	5	1	KAMPEMBA	2006-07-15	3200	0	0	0	0		2		0	1	2014-10-30	8	8.1	3	27	23.4	23.4	23.4	116.7	116.7	116.7	56	56	56	17.182	104	105	97	104.5	100.5	101	69	66	63	67.5	66	64.5	85	78	70	80
2190	KK	F	0	NURU BONGONGA	5	1	KAMPEMBA	2008-02-10	4000	0	0	0	0		2		0	0	2014-10-30	6	6.3	2	27	19.1	19.1	19.1	113.5	113.5	113.5	50	50	50	14.8266	102	106	103	104	102.5	104.5	49	60	54	54.5	51.5	57	74	83	75	88
2191	LM	F	0	NURU BONGONGA	5	1	KAMPEMBA	2007-03-12	2600	0	0	0	0		2		0	0	2014-10-30	7	7.3	3	28	22.7	22.6	22.65	119.5	119.5	119.5	54	54	54	15.8611	117	120	112	118.5	114.5	116	72	82	75	77	73.5	78.5	96	96	95	112
2192	MB	M	1	NURU BONGONGA	5	1	KAMPEMBA	2007-07-09	3900	0	0	0	0		2		0	0	2014-10-30	7	7.1	3	27	20.9	21	20.95	120.5	120.5	120.5	55	55	55	14.4281	128	131	124	129.5	126	127.5	91	78	80	84.5	85.5	79	101	102	100	103
2193	KS	M	1	NURU BONGONGA	5	1	KAMPEMBA	2006-04-14	3100	0	0	0	0		2		0	0	2014-10-30	8	8.2	3	27	18.1	18.1	18.1	109.6	109.5	109.55	51	51	51	15.0818	110	110	105	110	107.5	107.5	74	70	64	72	69	67	90	84	83	115
2194	MG	F	0	NURU BONGONGA	5	1	KAMPEMBA	2007-08-27	3800	0	0	0	0		2		0	0	2014-10-30	7	7.1	3	28	22.8	22.8	22.8	114.7	114.6	114.65	58.1	58.1	58.1	17.3455	92	94	99	93	95.5	96.5	54	52	59	53	56.5	55.5	76	75	76	102
2195	MK	F	0	NURU BONGONGA	5	1	KAMPEMBA	2008-06-18	3200	0	0	0	0		2		0	0	2014-10-30	6	6.2	2	26	21	21	21	112	112	112	55.6	55.6	55.6	16.7411	120	110	110	115	115	110	71	76	64	73.5	67.5	70	94	91	85	125
2196	EE	F	0	NURU BONGONGA	5	1	KAMPEMBA	2007-09-06	3200	0	0	0	0		2		1	0	2014-10-30	7	7.1	3	28	22.8	22.8	22.8	119.1	119.1	119.1	55.3	55.3	55.3	16.0735	105	99	101	102	103	100	60	59	68	59.5	64	63.5	81	78	84	87
2197	NN	M	1	NURU BONGONGA	5	1	KAMPEMBA	2006-12-01	3800	0	0	0	0		2		0	0	2014-10-30	7	8	3	27	25.7	25.7	25.7	119	119	119	55	55	55	18.1484	100	94	109	97	104.5	101.5	43	60	65	51.5	54	62.5	62	77	81	81
2198	MB	F	0	NURU BONGONGA	5	1	KAMPEMBA	2008-02-08	3050	0	0	0	0		2		0	0	2014-10-30	6	6.3	2	25	24.7	24.7	24.7	127	127	127	52.1	52.1	52.1	15.314	110	107	117	108.5	113.5	112	70	63	66	66.5	68	64.5	82	80	83	76
2199	MC	F	0	NURU BONGONGA	5	1	KAMPEMBA	2006-09-27	3800	0	0	0	0		2		0	0	2014-10-30	8	8	3	27	24.4	24.4	24.4	119	119	119	59	59	59	17.2304	92	103	94	97.5	93	98.5	64	55	52	59.5	58	53.5	77	72	71	77
2200	JL	M	1	NURU BONGONGA	5	1	KAMPEMBA	2006-04-23	4000	0	0	0	0		2		1	1	2014-10-30	8	8.2	3	29	25.6	25.6	25.6	124.7	124.7	124.7	56	56	56	16.4629	124	111	103	117.5	113.5	107	55	63	71	59	63	67	95	84	83	86
2201	KL	M	1	NURU BONGONGA	5	1	KAMPEMBA	2006-06-03	4000	0	0	0	0		2		0	0	2014-10-31	8	8.2	3	26	26.4	26.4	26.4	133.2	133.2	133.2	59	59	59	14.8797	92	87	94	89.5	93	90.5	56	57	60	56.5	58	58.5	71	68	71	78
2202	AM	M	1	NURU BONGONGA	5	1	KAMPEMBA	2006-03-12	3500	0	0	0	0		2		0	0	2014-10-31	8	8.3	3	26	18.9	19	18.95	113.5	113.5	113.5	53	53	53	14.7102	103	104	101	103.5	102	102.5	61	60	60	60.5	60.5	60	77	76	75	94
2203	MT	M	1	NURU BONGONGA	5	1	KAMPEMBA	2008-03-24	3950	0	0	0	0		2		0	0	2014-10-31	7	6.2	2	29	24.1	24.1	24.1	125.1	125.1	125.1	54.7	54.7	54.7	15.3994	99	89	95	94	97	92	55	57	56	56	55.5	56.5	76	68	73	78
2204	MV	F	0	NURU BONGONGA	4	1	KAMPEMBA	2008-10-28	3200	0	0	0	0		2		0	0	2014-10-31	6	6	2	25	18.1	18.1	18.1	114.3	114.3	114.3	51	51	51	13.8543	108	100	104	104	106	102	79	61	72	70	75.5	66.5	96	72	88	108
2205	BT	F	0	NURU BONGONGA	4	1	KAMPEMBA	2007-07-12	3500	0	0	0	0		2		0	0	2014-10-31	7	7.1	3	26	20.5	20.5	20.5	114	114	114	53	53	53	15.7741	104	106	106	105	105	106	61	71	68	66	64.5	69.5	81	83	85	101
2206	MG	M	1	NURU BONGONGA	4	1	KAMPEMBA	2009-07-31	4050	0	0	0	0		2		0	0	2014-10-31	5	5.1	2	26	17.8	17.8	17.8	109.1	109.2	109.15	47.2	47.2	47.2	14.9408	105	96	105	100.5	105	100.5	70	61	66	65.5	68	63.5	80	74	83	105
2207	IM	F	0	NURU BONGONGA	4	1	KAMPEMBA	2009-10-12	3800	0	0	0	0		2		0	0	2014-10-31	5	5.1	2	25	18.1	18.1	18.1	106.1	106.1	106.1	51	51	51	16.0786	109	109	109	109	109	109	75	76	76	75.5	75.5	76	87	89	90	110
2208	PM	F	0	NURU BONGONGA	4	1	KAMPEMBA	2009-11-25	3020	0	0	0	0		2		0	0	2014-10-31	4	5	2	25	19.2	19.1	19.15	113.1	113.1	113.1	53	53	53	14.9708	98	87	85	92.5	91.5	86	54	48	54	51	54	51	69	68	63	88
2209	SE	M	1	NURU BONGONGA	4	1	KAMPEMBA	2009-10-19	3300	0	0	0	0		2		1	0	2014-10-31	5	5	2	27	13.2	13.3	13.25	100.2	100.2	100.2	45.2	45.2	45.2	13.1972	102	100	96	101	99	98	54	66	48	60	51	57	76	77	67	127
2210	MK	F	0	NURU BONGONGA	4	1	KAMPEMBA	2008-07-15	#NULL!	0	0	0	0		2		0	0	2014-10-31	6	6.1	2	27	14.2	14.2	14.2	102.5	102.4	102.45	46.2	46.2	46.2	13.529	109	101	99	105	104	100	80	54	85	67	82.5	69.5	87	75	75	101
2211	OW	F	0	NURU BONGONGA	4	1	KAMPEMBA	2009-12-27	#NULL!	0	0	0	0		2		0	1	2014-10-31	4	5	2	27	17.4	17.5	17.45	113.2	113.1	113.15	49.2	49.2	49.2	13.6297	109	112	106	110.5	107.5	109	80	77	72	78.5	76	74.5	92	90	93	119
2212	VK	M	1	NURU BONGONGA	4	1	KAMPEMBA	2008-03-31	3500	0	0	0	0		2		0	0	2014-10-31	6	6.2	2	27	17.1	17.1	17.1	108.2	108.2	108.2	50.2	50.2	50.2	14.6063	117	110	106	113.5	111.5	108	77	83	70	80	73.5	76.5	99	96	82	111
2213	MM	M	1	NURU BONGONGA	4	1	KAMPEMBA	2009-03-05	3400	0	0	0	0		2		0	0	2014-10-31	5	5.3	2	27	16.1	16.1	16.1	107.2	107.2	107.2	49	49	49	14.0099	103	99	107	101	105	103	52	70	64	61	58	67	85	84	80	90
2214	KK	M	1	NURU BONGONGA	4	1	KAMPEMBA	2006-04-20	3200	0	0	0	0		2		0	0	2014-10-31	8	8.2	3	27	20.1	20.1	20.1	112.9	112.8	112.85	51.2	51.2	51.2	15.7831	98	97	98	97.5	98	97.5	55	65	62	60	58.5	63.5	74	77	73	83
2215	LL	M	1	NURU BONGONGA	4	1	KAMPEMBA	2010-02-17	#NULL!	0	0	0	0		2		0	0	2014-10-31	4	4.3	2	27	17.1	17.1	17.1	105.2	105.2	105.2	53	53	53	15.4513	111	102	71	106.5	91	86.5	54	75	59	64.5	56.5	67	83	82	64	105
2216	KM	M	1	NURU BONGONGA	4	1	KAMPEMBA	2009-06-17	2900	0	0	0	0		2		0	0	2014-10-31	5	5.2	2	27	20.8	20.9	20.85	113.2	113.2	113.2	57.2	57.2	57.2	16.271	102	114	97	108	99.5	105.5	66	53	53	59.5	59.5	53	79	77	74	94
2217	KK	M	1	NURU BONGONGA	4	1	KAMPEMBA	2009-11-22	3800	0	0	0	0		2		0	1	2014-10-31	4	5	2	27	16.2	16.2	16.2	107.8	107.7	107.75	49.8	49.8	49.8	13.9534	111	101	101	106	106	101	56	50	53	53	54.5	51.5	82	73	71	92
2218	SB	F	0	NURU BONGONGA	4	1	KAMPEMBA	2009-03-24	3150	0	0	0	0		2		0	1	2014-10-31	5	5.2	2	27	18.2	18.2	18.2	106.2	106.2	106.2	55.2	55.1	55.15	16.137	137	109	96	123	116.5	102.5	64	62	57	63	60.5	59.5	82	86	72	99
2219	BP	F	0	NURU BONGONGA	4	1	KAMPEMBA	2010-10-22	3450	0	0	0	0		2		0	0	2014-10-31	4	4	2	27	18.2	18.2	18.2	110.2	110.3	110.25	49.2	49.2	49.2	14.9732	97	96	94	96.5	95.5	95	50	49	50	49.5	50	49.5	69	69	68	106
2220	KT	M	1	NURU BONGONGA	4	1	KAMPEMBA	2006-12-01	3500	0	0	0	0		2		0	0	2014-10-31	7	8	3	27	16.5	16.5	16.5	106.2	106.2	106.2	50.1	50.1	50.1	14.6297	96	100	100	98	98	100	58	61	58	59.5	58	59.5	75	79	70	96
2221	TK	F	0	NURU BONGONGA	4	1	KAMPEMBA	2009-09-20	#NULL!	0	0	0	0		2		0	0	2014-10-31	5	5.1	2	27	16.6	16.6	16.6	103.5	103.5	103.5	51.2	51.2	51.2	15.4963	90	89	87	89.5	88.5	88	45	52	46	48.5	45.5	49	65	63	63	99
2222	MN	F	0	NURU BONGONGA	4	1	KAMPEMBA	2010-04-26	3520	0	0	0	0		2		0	0	2014-10-31	4	4.2	2	27	20.5	20.5	20.5	116	116	116	54.2	54.2	54.2	15.2348	95	104	104	99.5	99.5	104	63	67	59	65	61	63	77	85	77	96
2223	KL	F	0	NURU BONGONGA	4	1	KAMPEMBA	2008-01-24	3200	0	0	0	0		2		0	0	2014-10-31	6	6.3	2	27	23.4	23.4	23.4	114.3	114.3	114.3	56.8	56.8	56.8	17.9111	106	106	96	106	101	101	58	62	56	60	57	59	83	78	76	87
2224	MB	F	0	NURU BONGONGA	4	1	KAMPEMBA	2009-10-25	3200	0	0	0	0		2		0	0	2014-10-31	5	5	2	27	17.3	17.3	17.3	107.3	107.3	107.3	51.2	51.1	51.15	15.0261	100	98	92	99	96	95	73	56	62	64.5	67.5	59	82	76	75	90
2225	BD	M	1	NURU BONGONGA	4	1	KAMPEMBA	2009-08-30	3600	0	0	0	0		2		0	0	2014-10-31	5	5.1	2	27	15.3	15.3	15.3	105.2	105.3	105.25	42.3	42.3	42.3	13.8117	97	93	92	95	94.5	92.5	51	56	49	53.5	50	52.5	71	68	68	75
2226	DO	M	1	NURU BONGONGA	4	1	KAMPEMBA	2009-05-20	2250	0	0	0	0		2		0	0	2014-10-31	5	5.2	2	27	20.1	20.1	20.1	107.2	107.2	107.2	52	52	52	17.4907	100	100	84	100	92	92	56	53	37	54.5	46.5	45	72	72	54	96
2227	SJ	F	0	NURU BONGONGA	4	1	KAMPEMBA	2009-04-23	3000	0	0	0	0		2		0	0	2014-10-31	5	5.2	2	27	19.9	20	19.95	105.2	105.2	105.2	53.2	53.1	53.15	18.0265	99	96	92	97.5	95.5	94	59	59	58	59	58.5	58.5	73	74	71	124
2228	KD	F	0	NURU BONGONGA	4	1	KAMPEMBA	2007-12-22	4200	0	0	0	0		2		0	0	2014-10-31	6	7	3	27	18.5	18.5	18.5	105.7	105.7	105.7	52.5	52.5	52.5	16.5585	98	96	95	97	96.5	95.5	60	62	59	61	59.5	60.5	77	77	73	86
2229	GM	F	0	NURU BONGONGA	4	1	KAMPEMBA	2009-03-03	2700	0	0	0	0		2		0	0	2014-10-31	5	5.3	2	29	21.5	21.6	21.55	121.5	121.5	121.5	54.5	54.5	54.5	14.598	105	99	101	102	103	100	74	73	81	73.5	77.5	77	86	89	90	88
2230	BK	F	0	NURU BONGONGA	4	1	KAMPEMBA	2008-08-24	3000	0	0	0	0		2		0	0	2014-10-31	6	6.1	2	29	22.5	22.5	22.5	118.7	118.6	118.65	57.2	57.2	57.2	15.9826	103	100	99	101.5	101	99.5	54	53	59	53.5	56.5	56	75	72	77	71
2231	MO	F	0	NURU BONGONGA	4	1	KAMPEMBA	2007-04-14	3400	0	0	0	0		2		0	0	2014-10-31	7	7.2	3	29	20.1	20.1	20.1	113.4	113.4	113.4	54.2	54.2	54.2	15.6304	110	106	107	108	108.5	106.5	84	80	71	82	77.5	75.5	97	90	87	110
2232	KM	M	1	NURU BONGONGA	8	1	KAMPEMBA	2005-01-01	3000	0	0	0	0		2		0	0	2014-11-01	9	9.3	3	25	22.1	22	22.05	125.7	125.7	125.7	52.2	52.5	52.35	13.9553	101	100	106	100.5	103.5	103	87	57	57	72	72	57	91	76	76	100
2233	AG	M	1	NURU BONGONGA	8	1	KAMPEMBA	2002-05-01	4500	0	0	0	0		2		0	0	2014-11-01	12	12.2	4	25	39.1	39.1	39.1	143.5	143.5	143.5	61.5	61.5	61.5	18.9877	122	122	120	122	121	121	69	81	72	75	70.5	76.5	89	96	91	90
2234	BL	F	0	NURU BONGONGA	8	1	KAMPEMBA	2004-09-28	3500	0	0	0	0		2		0	0	2014-11-01	10	10	3	27	34.1	34.1	34.1	136.6	136.7	136.65	62.5	62.5	62.5	18.2614	124	129	130	126.5	127	129.5	89	70	74	79.5	81.5	72	102	91	92	112
2235	EM	M	1	NURU BONGONGA	8	1	KAMPEMBA	2005-10-23	3150	0	0	0	0		2		0	0	2014-11-01	9	9	3	27	26.7	26.7	26.7	128.6	128.6	128.6	55.2	55.3	55.25	16.1447	97	98	97	97.5	97	97.5	65	59	49	62	57	54	78	74	75	106
2236	KN	M	1	NURU BONGONGA	8	1	KAMPEMBA	2002-04-17	#NULL!	0	0	0	0		2		0	0	2014-11-01	12	12.2	4	27	35.9	35.8	35.85	145.2	145.3	145.25	60	60	60	16.9925	125	112	112	118.5	118.5	112	74	73	64	73.5	69	68.5	84	84	82	79
2237	SM	F	0	NURU BONGONGA	8	1	KAMPEMBA	2002-07-12	3800	0	0	0	0		2		0	0	2014-11-01	12	12.1	4	28	41.6	41.7	41.65	154.1	154.2	154.15	65.2	65.2	65.2	17.5278	128	127	114	127.5	121	120.5	82	81	75	81.5	78.5	78	97	100	99	73
2238	AN	M	1	NURU BONGONGA	8	1	KAMPEMBA	2005-02-25	2900	0	0	0	0		2		0	1	2014-11-01	9	9.2	3	28	31.6	31.5	31.55	136	136	136	62.5	62.5	62.5	17.0577	96	108	119	102	107.5	113.5	67	72	74	69.5	70.5	73	76	85	87	86
2239	KM	F	0	NURU BONGONGA	8	1	KAMPEMBA	2004-12-28	2900	0	0	0	0		2		0	0	2014-11-01	9	9.9	3	28	22.1	22.1	22.1	125	125	125	51.3	51.3	51.3	14.144	139	129	123	134	131	126	88	85	71	86.5	79.5	78	109	102	98	103
2240	NN	F	0	NURU BONGONGA	8	1	KAMPEMBA	2004-10-11	#NULL!	0	0	0	0		2		0	0	2014-11-01	10	10	3	28	37.9	40	38.95	150.2	150.2	150.2	61	61	61	17.265	106	104	102	105	104	103	60	67	76	63.5	68	71.5	79	83	85	72
2241	ZN	F	0	NURU BONGONGA	8	1	KAMPEMBA	2003-06-03	3000	0	0	0	0		2		0	0	2014-11-01	11	11.1	4	28	35.7	35.8	35.75	146.7	146.7	146.7	63	63	63	16.6118	112	107	106	109.5	109	106.5	71	68	64	69.5	67.5	66	87	84	83	112
2242	MK	F	0	NURU BONGONGA	8	1	KAMPEMBA	2004-10-26	#NULL!	0	0	0	0		2		0	0	2014-11-01	10	10	3	28	27.3	27.4	27.35	135.7	135.7	135.7	55.8	55.7	55.75	14.8524	125	130	120	127.5	122.5	125	68	64	71	66	69.5	67.5	90	91	86	98
2243	KM	M	1	NURU BONGONGA	8	1	KAMPEMBA	2004-03-15	#NULL!	0	0	0	0		2		0	0	2014-11-01	10	10.2	3	28	25.7	25.8	25.75	122.3	122.3	122.3	58.2	58.2	58.2	17.2157	111	108	99	109.5	105	103.5	75	80	65	77.5	70	72.5	89	91	81	90
2244	KK	M	1	NURU BONGONGA	8	1	KAMPEMBA	2004-07-12	2800	0	0	0	0		2		0	0	2014-11-01	10	10.1	3	28	55.2	55.2	55.2	158.6	158.6	158.6	71	71	71	21.9449	142	121	129	131.5	135.5	125	82	76	77	79	79.5	76.5	104	96	91	85
2245	KE	M	1	NURU BONGONGA	8	1	KAMPEMBA	2001-01-01	4500	0	0	0	0		2		0	0	2014-11-01	13	13.3	4	28	43.7	43.6	43.65	148.3	148.3	148.3	62	62	62	19.8473	101	114	102	107.5	101.5	108	46	50	79	48	62.5	64.5	75	81	85	70
2246	AO	F	0	NURU BONGONGA	8	1	KAMPEMBA	2003-04-09	3450	0	0	0	0		#NULL!		0	0	2014-11-01	11	11.2	4	28	39.8	39.7	39.75	144.8	144.7	144.75	63	63	63	18.9714	144	121	112	132.5	128	116.5	68	66	56	67	62	61	102	85	78	102
2247	MO	M	1	NURU BONGONGA	8	1	KAMPEMBA	2003-01-01	2900	0	0	0	0		#NULL!		0	0	2014-11-01	11	11.3	4	28	30.6	30.6	30.6	136.2	136.2	136.2	55.1	55.2	55.15	16.4956	102	103	101	102.5	101.5	102	73	55	62	64	67.5	58.5	82	75	79	84
2248	Mx	M	1	NURU BONGONGA	9	1	KAMPEMBA	2002-07-25	5800	0	0	0	0		2		0	0	2014-11-01	12	12.1	4	28	39.5	39.5	39.5	146.2	146.3	146.25	63.5	63.5	63.5	18.4674	137	133	139	135	138	136	68	63	79	65.5	73.5	71	98	89	96	74
2249	Mx	F	0	NURU BONGONGA	9	1	KAMPEMBA	2003-02-15	3500	0	0	0	0		2		1	0	2014-11-01	11	11.2	4	28	38.9	38.9	38.9	152.7	152.7	152.7	65	65	65	16.6829	125	126	104	125.5	114.5	115	81	70	66	75.5	73.5	68	97	89	84	84
2250	MM	F	0	NURU BONGONGA	9	1	KAMPEMBA	2003-10-24	3600	0	0	0	0		2		0	0	2014-11-01	11	11	4	28	39.4	39.4	39.4	138.7	138.7	138.7	65.7	65.7	65.7	20.4806	110	106	128	108	119	117	55	61	58	58	56.5	59.5	70	80	79	57
2251	BK	M	1	NURU BONGONGA	9	1	KAMPEMBA	2001-11-16	3500	0	0	0	0		2		0	0	2014-11-01	12	13	4	28	38.1	38.2	38.15	136.2	136.2	136.2	62.5	62.5	62.5	20.5655	109	106	105	107.5	107	105.5	61	59	67	60	64	63	79	80	81	79
2252	KM	F	0	NURU BONGONGA	9	1	KAMPEMBA	2003-03-01	3000	0	0	0	0		2		0	0	2014-11-01	11	11.2	4	28	42.2	42.1	42.15	145.9	145.8	145.85	62	62	62	19.8146	102	101	104	101.5	103	102.5	82	55	60	68.5	71	57.5	88	75	77	86
2253	IM	M	1	NURU BONGONGA	9	1	KAMPEMBA	2002-08-10	#NULL!	0	0	0	0		2		0	0	2014-11-01	12	12.1	4	28	43.5	43.5	43.5	160.8	160.7	160.75	63.5	63.5	63.5	16.834	120	126	110	123	115	118	80	69	66	74.5	73	67.5	93	90	90	87
2254	BY	F	0	NURU BONGONGA	9	1	KAMPEMBA	2003-11-23	3500	0	0	0	0		2		0	1	2014-11-01	10	10.9	3	28	33.2	33.2	33.2	137.7	137.7	137.7	56.5	56.5	56.5	17.5094	95	97	93	96	94	95	48	61	48	54.5	48	54.5	67	75	63	73
2255	AE	F	0	NURU BONGONGA	9	1	KAMPEMBA	2003-06-16	#NULL!	0	0	0	0		2		1	0	2014-11-01	11	11.1	4	28	33.3	33.3	33.3	141	141	141	61.5	61.5	61.5	16.7497	137	119	111	128	124	115	87	68	69	77.5	78	68.5	113	89	85	76
2256	MM	F	0	NURU BONGONGA	9	1	KAMPEMBA	2000-06-01	#NULL!	0	0	0	0		2		0	0	2014-11-01	14	14.2	5	28	42.8	42.7	42.75	151.7	151.7	151.7	61.5	61.5	61.5	18.5765	121	113	126	117	123.5	119.5	89	56	58	72.5	73.5	57	102	76	78	79
2257	LM	M	1	NURU BONGONGA	9	1	KAMPEMBA	2004-08-12	#NULL!	0	0	0	0		#NULL!		0	0	2014-11-01	10	10.1	3	28	31.8	31.7	31.75	132.5	132.5	132.5	58.1	58.1	58.1	18.0847	105	114	90	109.5	97.5	102	62	57	59	59.5	60.5	58	78	78	72	72
2258	TN	M	1	NURU BONGONGA	9	1	KAMPEMBA	1999-03-23	#NULL!	0	0	0	0		2		0	0	2014-11-01	15	15.2	5	28	34.9	35	34.95	141	141	141	58.2	58.2	58.2	17.5796	113	100	96	106.5	104.5	98	66	68	64	67	65	66	82	89	73	74
2259	KM	M	1	NURU BONGONGA	9	1	KAMPEMBA	2003-12-16	3700	0	0	0	0		2		0	0	2014-11-01	10	10.9	3	28	26.1	26.2	26.15	128.5	128.5	128.5	53.7	53.7	53.7	15.8367	107	102	104	104.5	105.5	103	77	59	60	68	68.5	59.5	90	75	78	93
2260	TI	F	0	NURU BONGONGA	9	1	KAMPEMBA	2002-07-24	#NULL!	0	0	0	0		2		0	0	2014-11-01	12	12.1	4	29	33.2	33.2	33.2	142	142	142	59.9	59.8	59.85	16.465	115	110	101	112.5	108	105.5	76	64	59	70	67.5	61.5	88	79	78	99
2261	IN	F	0	NURU BONGONGA	9	1	KAMPEMBA	2002-06-12	2500	0	0	0	0		2		0	0	2014-11-01	12	12.1	4	29	38.2	38.1	38.15	146.9	146.8	146.85	62	62	62	17.6908	141	142	134	141.5	137.5	138	74	67	71	70.5	72.5	69	104	97	97	101
2262	NN	F	0	NURU BONGONGA	9	1	KAMPEMBA	2001-03-23	#NULL!	0	0	0	0		2		0	0	2014-11-01	13	13.2	4	29	41.6	41.7	41.65	147.5	147.5	147.5	66.7	66.8	66.75	19.1439	141	132	82	136.5	111.5	107	72	55	54	63.5	63	54.5	100	87	67	90
2263	ME	F	0	NURU BONGONGA	9	1	KAMPEMBA	2003-02-02	#NULL!	0	0	0	0		2		0	0	2014-11-01	11	11.3	4	29	36.2	36.3	36.25	147.8	147.7	147.75	61.8	61.8	61.8	16.6055	142	130	128	136	135	129	71	69	73	70	72	71	96	91	90	72
2264	KK	M	1	NURU BONGONGA	9	1	KAMPEMBA	2002-04-09	3900	0	0	0	0		2		0	0	2014-11-01	12	12.2	4	29	35.8	35.9	35.85	141.5	141.5	141.5	57.2	57.2	57.2	17.9051	131	120	101	125.5	116	110.5	71	73	78	72	74.5	75.5	90	94	87	93
2265	WV	F	0	NURU BONGONGA	9	1	KAMPEMBA	2000-06-28	3800	0	0	0	0		2		0	0	2014-11-01	14	14.1	5	29	34.6	34.5	34.55	135.6	135.7	135.65	63.2	63.2	63.2	18.7762	97	100	107	98.5	102	103.5	51	66	60	58.5	55.5	63	71	77	75	63
2266	WM	F	0	NURU BONGONGA	9	1	KAMPEMBA	2003-01-23	3000	0	0	0	0		#NULL!		0	0	2014-11-01	11	11.2	4	29	40	40.1	40.05	149.2	149.2	149.2	63.2	63.2	63.2	17.9914	107	104	106	105.5	106.5	105	69	56	70	62.5	69.5	63	84	65	79	77
2267	KB	M	1	NURU BONGONGA	9	1	KAMPEMBA	1999-03-23	3100	0	0	0	0		2		0	0	2014-11-01	15	15.2	5	29	30.6	30.6	30.6	141.9	141.9	141.9	59.2	59.2	59.2	15.197	105	105	114	105	109.5	109.5	68	68	49	68	58.5	58.5	82	83	90	80
2268	SA	M	1	MARAMBA I	6	1	KAMPEMBA	2005-05-19	3250	0	0	0	0		2		0	0	2014-10-08	9	9.1	3	31	26.2	26.2	26.2	129	129	129	56	56	56	15.7442	111	111	107	111	109	109	77	75	70	76	73.5	72.5	93	86	82	100
2269	SB	F	0	MARAMBA I	6	1	KAMPEMBA	2005-12-27	#NULL!	0	0	0	0		2		0	0	2014-10-08	8	8.9	3	31	26.1	26.1	26.1	128	128	128	55	55	55	15.9302	84	91	93	87.5	88.5	92	51	48	48	49.5	49.5	48	62	64	62	76
2270	US	M	1	MARAMBA I	8	1	KAMPEMBA	2001-11-30	3450	0	0	0	0		2		0	0	2014-11-08	12	12.9	4	31	36.2	36.2	36.2	150	150	150	63.6	63.6	63.6	16.0889	104	103	104	103.5	104	103.5	71	59	58	65	64.5	58.5	85	78	78	78
[truncated: 5,581 more rows]
[truncated: 7 more columns]
